# Supplementary material for: ASAR lncRNAs control DNA replication timing through interactions with multiple hnRNP/RNA binding proteins
Source: eLife. 2024 Jun 18;13:RP95898. doi: 10.7554/eLife.95898 (PMC11186638; doi:10.7554/eLife.95898)
Supplement: Figure 1—source data 1. [file elife-95898-fig1-data1.xlsx]

## Sheet: ASAR1-187
Figure 1-table supplement 1
CHR	Start	Stop	RBP_Cell line_exp	Fold Enrichment	log10(pvalue)
chr1	187121486	187121617	QKI_K562_rep02	6.25665	18.378
chr1	187192681	187192753	PTBP1_K562_rep01	4.47134	15.2365
chr1	187192673	187192755	PTBP1_K562_rep02	4.20235	14.7995
chr1	187236063	187236166	AGGF1_K562_rep02	4.76537	13.8341
chr1	187121495	187121600	QKI_K562_rep01	6.3417	13.8052
chr1	187235906	187236019	HNRNPL_K562_rep02	4.44638	12.6731
chr1	187236013	187236036	AGGF1_K562_rep02	3.93714	10.4235
chr1	187236036	187236051	AGGF1_K562_rep02	4.22932	9.12932
chr1	187123354	187123411	ZRANB2_K562_rep02	5.40357	8.88993
chr1	187276122	187276147	UTP3_K562_rep02	7.75973	8.5828
chr1	187182451	187182505	PTBP1_K562_rep02	5.14095	8.11407
chr1	187235967	187236013	AGGF1_K562_rep02	4.03667	7.78827
chr1	187272947	187273015	PTBP1_K562_rep02	4.20235	7.59321
chr1	187122659	187122809	HNRNPM_K562_rep01	4.76639	7.39818
chr1	187236061	187236179	HNRNPL_K562_rep02	3.34462	7.26179
chr1	187183237	187183282	SF3B1_K562_rep02	7.34534	6.85953
chr1	187272952	187273015	PTBP1_K562_rep01	4.26189	6.59655
chr1	187129529	187129598	PTBP1_K562_rep02	4.70485	5.81225
chr1	187112712	187112766	FMR1_K562_rep02	4.51369	5.67784
chr1	187115956	187116052	PTBP1_K562_rep02	4.61739	5.43236
chr1	187103047	187103057	SF3B1_K562_rep02	7.02341	5.41292
chr1	187103057	187103088	SF3B1_K562_rep02	7.02341	5.41292
chr1	187218563	187218572	SF3B1_K562_rep02	7.02341	5.41292
chr1	187218572	187218602	SF3B1_K562_rep02	7.02341	5.41292
chr1	187115996	187116089	PTBP1_K562_rep01	4.84685	5.39854
chr1	187221659	187221668	SF3B1_K562_rep01	6.62864	4.95703
chr1	187221668	187221698	SF3B1_K562_rep01	6.62864	4.95703
chr1	187099893	187100053	SAFB2_K562_rep01	3.22511	4.55496
chr1	187062749	187062852	QKI_K562_rep02	3.57858	4.46257
chr1	187128141	187128220	PTBP1_K562_rep02	3.11989	4.41421
chr1	187129526	187129602	PTBP1_K562_rep01	4.58382	4.40618
chr1	187182451	187182501	PTBP1_K562_rep01	4.58382	4.40618
chr1	187062774	187062835	QKI_K562_rep01	3.98807	4.3536
chr1	187235903	187236005	HNRNPL_K562_rep01	3.23609	4.2566
chr1	187178859	187178926	TARDBP_K562_rep01	4.07714	4.13641
chr1	187173067	187173075	SF3B1_K562_rep02	6.60837	3.98381
chr1	187173075	187173102	SF3B1_K562_rep02	6.60837	3.98381
chr1	187413901	187413977	PTBP1_K562_rep02	4.20235	3.92866
chr1	187235947	187236002	AGGF1_K562_rep01	4.26643	3.88008
chr1	187235909	187235950	AGGF1_K562_rep02	3.99485	3.78713
chr1	187116841	187116891	QKI_K562_rep01	4.6255	3.78039
chr1	187123358	187123408	ZRANB2_K562_rep01	4.75643	3.67287
chr1	187085143	187085182	SF3B1_K562_rep01	6.2136	3.6425
chr1	187157924	187157965	SF3B1_K562_rep01	6.2136	3.6425
chr1	187183726	187183757	SF3B1_K562_rep01	6.2136	3.6425
chr1	187236018	187236034	HNRNPL_HepG2_rep01	3.07337	3.54232
chr1	187236034	187236057	HNRNPL_HepG2_rep01	3.07337	3.54232
chr1	187129945	187130024	HNRNPM_K562_rep01	3.84885	3.54147
chr1	187077118	187077164	WRN_K562_rep02	4.31975	3.53047
chr1	187156932	187157011	TARDBP_K562_rep02	3.7692	3.46495
chr1	187113904	187113914	AARS_K562_rep01	5.26531	3.43877
chr1	187113914	187113945	AARS_K562_rep01	5.26531	3.43877
chr1	187109084	187109146	PTBP1_K562_rep01	4.26189	3.42734
chr1	187129524	187129593	MATR3_K562_rep01	3.8394	3.33944
chr1	187122830	187122893	HNRNPM_K562_rep01	3.76639	3.29197
chr1	187104801	187104849	LARP4_K562_rep02	4.30653	3.28952
chr1	187179397	187179494	PTBP1_K562_rep02	3.20235	3.27944
chr1	187126635	187126703	TARDBP_K562_rep01	3.75521	3.08314
chr1	187115989	187116167	ILF3_K562_rep01	3.69403	3.08243
chr1	187107101	187107140	WDR3_K562_rep01	4.85858	3.01176
chr1	187123297	187123339	WDR3_K562_rep01	4.85858	3.01176
chr1	187192676	187192749	MATR3_K562_rep02	3.63217	2.99451
chr1	187063193	187063203	TBRG4_HepG2_rep02	4.69845	2.84825
chr1	187063203	187063235	TBRG4_HepG2_rep02	4.69845	2.84825
chr1	187069947	187069985	AGGF1_K562_rep01	4.68147	2.83107
chr1	187103748	187103834	SAFB2_K562_rep01	2.70574	2.7805
chr1	187236020	187236055	TROVE2_HepG2_rep02	3.90055	2.71129
chr1	187158003	187158031	NPM1_K562_rep01	4.49244	2.64225
chr1	187236051	187236105	AKAP8L_K562_rep02	3.01913	2.62177
chr1	187195817	187195862	GPKOW_K562_rep02	4.14342	2.59268
chr1	187088309	187088358	QKI_K562_rep01	4.14007	2.58892
chr1	187174755	187174874	SAFB2_K562_rep02	3.42871	2.55766
chr1	187236014	187236053	AGGF1_HepG2_rep01	2.68166	2.50784
chr1	187105306	187105343	AARS_K562_rep01	4.85027	2.50754
chr1	187424848	187424887	AARS_K562_rep01	4.85027	2.50754
chr1	187062776	187062827	PTBP1_K562_rep01	3.84685	2.46855
chr1	187191694	187191733	PTBP1_K562_rep01	3.84685	2.46855
chr1	187278805	187278815	PUM2_K562_rep01	4.71537	2.40061
chr1	187101709	187101753	NIPBL_K562_rep01	3.14852	2.34769
chr1	187136814	187136824	AARS_K562_rep02	4.63786	2.33974
chr1	187136824	187136856	AARS_K562_rep02	4.63786	2.33974
chr1	187236046	187236130	HNRNPL_K562_rep01	2.1917	2.32464
chr1	187103448	187103485	NIPBL_K562_rep01	3.88549	2.31077
chr1	187321424	187321478	NIPBL_K562_rep01	3.88549	2.31077
chr1	187141192	187141197	WRN_K562_rep02	4.58279	2.29676
chr1	187141197	187141214	WRN_K562_rep02	4.58279	2.29676
chr1	187124880	187124931	HNRNPM_K562_rep01	3.37936	2.28931
chr1	187125062	187125139	MATR3_K562_rep01	3.35397	2.23358
chr1	187192669	187192753	MATR3_K562_rep01	3.35397	2.23358
chr1	187236054	187236117	GTF2F1_K562_rep02	3.49473	2.19111
chr1	187072822	187072832	WDR3_K562_rep01	4.44354	2.18916
chr1	187072832	187072863	WDR3_K562_rep01	4.44354	2.18916
chr1	187099388	187099423	WDR3_K562_rep01	4.44354	2.18916
chr1	187222896	187222906	WDR3_K562_rep01	4.44354	2.18916
chr1	187222906	187222937	WDR3_K562_rep01	4.44354	2.18916
chr1	187236018	187236053	XPO5_HepG2_rep02	3.74889	2.16748
chr1	187103744	187103792	SAFB2_K562_rep02	3.2172	2.15692
chr1	187163191	187163201	SLBP_K562_rep01	4.39691	2.15347
chr1	187163201	187163235	SLBP_K562_rep01	4.39691	2.15347
chr1	187228467	187228475	AARS_K562_rep01	3.85027	2.14126
chr1	187228475	187228501	AARS_K562_rep01	3.85027	2.14126
chr1	187156930	187156981	TARDBP_K562_rep01	3.21464	2.07123
chr1	187278815	187278847	PUM2_K562_rep01	3.71537	2.0372
chr1	187308067	187308077	DROSHA_K562_rep01	4.23976	2.03458
chr1	187308077	187308111	DROSHA_K562_rep01	4.23976	2.03458
chr1	187432861	187432869	WRN_K562_rep01	4.23168	2.02852
chr1	187432869	187432897	WRN_K562_rep01	4.23168	2.02852
chr1	187129528	187129609	MATR3_K562_rep02	3.21713	2.02346
chr1	187062908	187062956	QKI_K562_rep01	3.81814	2.00846
chr1	187287655	187287699	QKI_K562_rep01	3.81814	2.00846
chr1	187413959	187413996	PTBP1_K562_rep01	3.58382	2.00021
chr1	187211052	187211107	PTBP1_K562_rep01	2.84685	1.9917
chr1	187100722	187100783	UCHL5_K562_rep01	3.32103	1.98736
chr1	187196988	187196998	DHX30_K562_rep02	4.1598	1.97494
chr1	187196998	187197030	DHX30_K562_rep02	4.1598	1.97494
chr1	187236020	187236052	XPO5_HepG2_rep01	3.5487	1.96549
chr1	187120473	187120525	MATR3_K562_rep01	3.20197	1.96282
chr1	187149813	187149887	ILF3_K562_rep01	3.14654	1.93129
chr1	187084361	187084403	PUM2_K562_rep02	3.18028	1.93072
chr1	187445562	187445571	NPM1_K562_rep01	4.0774	1.91411
chr1	187445571	187445600	NPM1_K562_rep01	4.0774	1.91411
chr1	187429673	187429682	FASTKD2_K562_rep01	4.06236	1.90307
chr1	187429682	187429711	FASTKD2_K562_rep01	4.06236	1.90307
chr1	187104467	187104521	SAFB2_K562_rep01	3.04677	1.89561
chr1	187231953	187232007	DDX55_K562_rep01	3.44641	1.8661
chr1	187178862	187178922	TARDBP_K562_rep02	3.11712	1.86167
chr1	187118714	187118757	EXOSC5_K562_rep02	3.26097	1.85143
chr1	187093757	187093767	NIPBL_K562_rep02	3.96171	1.82984
chr1	187093767	187093799	NIPBL_K562_rep02	3.96171	1.82984
chr1	187104760	187104792	NIPBL_K562_rep02	3.96171	1.82984
chr1	187102714	187102782	LARP4_K562_rep02	2.8211	1.80433
chr1	187149809	187149846	NIPBL_K562_rep01	3.56356	1.7881
chr1	187423849	187423893	NIPBL_K562_rep01	3.56356	1.7881
chr1	187071006	187071142	KHDRBS1_K562_rep02	1.9494	1.78642
chr1	187164293	187164361	KHSRP_K562_rep01	2.95618	1.77783
chr1	187236016	187236088	GTF2F1_K562_rep01	3.12553	1.76886
chr1	187414350	187414386	PTBP1_K562_rep02	3.20235	1.75714
chr1	187115581	187115725	KHSRP_K562_rep02	2.99899	1.75323
chr1	187102290	187102339	SAFB2_K562_rep02	2.96928	1.75045
chr1	187105280	187105336	SAFB2_K562_rep02	2.96928	1.75045
chr1	187096366	187096394	LARP4_K562_rep02	3.49917	1.73423
chr1	187100988	187101029	LARP4_K562_rep02	3.49917	1.73423
chr1	187251935	187251973	LARP4_K562_rep02	3.49917	1.73423
chr1	187167359	187167436	HNRNPL_K562_rep02	2.90722	1.73171
chr1	187101551	187101591	SAFB2_K562_rep01	2.88631	1.70131
chr1	187065053	187065082	GEMIN5_K562_rep01	3.77663	1.69794
chr1	187099890	187099955	SAFB2_K562_rep02	2.2912	1.68483
chr1	187156208	187156215	ZRANB2_K562_rep01	3.75643	1.68378
chr1	187156215	187156236	ZRANB2_K562_rep01	3.75643	1.68378
chr1	187097407	187097446	DROSHA_K562_rep01	3.23976	1.68336
chr1	187097424	187097497	UCHL5_K562_rep01	3.09864	1.6552
chr1	187126629	187126696	TARDBP_K562_rep02	2.89473	1.64745
chr1	187107081	187107091	TBRG4_K562_rep01	3.39114	1.6456
chr1	187107091	187107123	TBRG4_K562_rep01	3.39114	1.6456
chr1	187193678	187193711	TBRG4_K562_rep01	3.39114	1.6456
chr1	187245317	187245357	TBRG4_K562_rep01	3.39114	1.6456
chr1	187139907	187139972	RBFOX2_K562_rep02	2.3852	1.63797
chr1	187219446	187219456	CPEB4_K562_rep02	3.68385	1.63326
chr1	187219456	187219484	CPEB4_K562_rep02	3.68385	1.63326
chr1	187278550	187278556	CPEB4_K562_rep02	3.68385	1.63326
chr1	187278556	187278575	CPEB4_K562_rep02	3.68385	1.63326
chr1	187305500	187305539	CPEB4_K562_rep02	3.68385	1.63326
chr1	187198661	187198733	CSTF2T_K562_rep01	3.01251	1.63222
chr1	187106906	187106916	QKI_K562_rep01	2.81814	1.61497
chr1	187106916	187106949	QKI_K562_rep01	2.81814	1.61497
chr1	187200994	187201034	GPKOW_K562_rep01	3.62987	1.59609
chr1	187209721	187209767	PTBP1_K562_rep01	2.58382	1.57703
chr1	187105402	187105426	WDR43_K562_rep02	3.59672	1.57343
chr1	187073066	187073103	WDR3_K562_rep01	2.85858	1.57207
chr1	187135241	187135371	KHSRP_K562_rep01	2.85664	1.56882
chr1	187121640	187121703	KHSRP_K562_rep01	2.85664	1.56882
chr1	187099928	187099951	DHX30_K562_rep01	3.57771	1.5605
chr1	187130238	187130333	QKI_K562_rep02	2.08673	1.55495
chr1	187164308	187164360	KHSRP_K562_rep02	2.80634	1.55377
chr1	187102759	187102814	NIPBL_K562_rep01	2.30052	1.54351
chr1	187155629	187155667	PTBP1_K562_rep01	3.26189	1.54255
chr1	187179415	187179456	PTBP1_K562_rep01	3.26189	1.54255
chr1	187210833	187210869	PTBP1_K562_rep01	3.26189	1.54255
chr1	187273034	187273053	PTBP1_K562_rep01	3.26189	1.54255
chr1	187119425	187119519	HNRNPM_K562_rep01	3.00085	1.54206
chr1	187130041	187130083	HNRNPM_K562_rep01	3.00085	1.54206
chr1	187104180	187104216	SAFB2_K562_rep02	2.77663	1.541
chr1	187101060	187101104	SAFB2_K562_rep02	2.87617	1.53192
chr1	187101924	187101972	SAFB2_K562_rep02	2.87617	1.53192
chr1	187104796	187104835	SAFB2_K562_rep02	2.87617	1.53192
chr1	187129098	187129205	KHSRP_K562_rep02	2.90588	1.5282
chr1	187155388	187155465	KHSRP_K562_rep02	2.90588	1.5282
chr1	187299502	187299604	KHSRP_K562_rep02	2.90588	1.5282
chr1	187121639	187121734	KHSRP_K562_rep02	2.90588	1.5282
chr1	187097573	187097580	SUB1_HepG2_rep01	3.20535	1.49853
chr1	187097580	187097604	SUB1_HepG2_rep01	3.20535	1.49853
chr1	187140237	187140271	CPEB4_K562_rep01	3.47361	1.49048
chr1	187194620	187194656	CPEB4_K562_rep01	3.47361	1.49048
chr1	187236014	187236050	LARP4_HepG2_rep02	2.91192	1.48002
chr1	187084016	187084049	FASTKD2_K562_rep02	3.42945	1.46119
chr1	187104799	187104831	FASTKD2_K562_rep02	3.42945	1.46119
chr1	187443718	187443724	FASTKD2_K562_rep02	3.42945	1.46119
chr1	187443724	187443745	FASTKD2_K562_rep02	3.42945	1.46119
chr1	187300184	187300248	QKI_K562_rep02	2.99362	1.45919
chr1	187095000	187095081	ILF3_K562_rep01	2.90553	1.45875
chr1	187144625	187144695	ILF3_K562_rep01	2.90553	1.45875
chr1	187096362	187096397	GPKOW_K562_rep02	3.40646	1.44604
chr1	187445554	187445593	GPKOW_K562_rep02	3.40646	1.44604
chr1	187069011	187069039	QKI_K562_rep01	3.4031	1.44384
chr1	187155394	187155400	QKI_K562_rep01	3.4031	1.44384
chr1	187155400	187155421	QKI_K562_rep01	3.4031	1.44384
chr1	187426644	187426671	DDX52_K562_rep02	3.40035	1.44203
chr1	187107726	187107803	TARDBP_K562_rep02	2.7692	1.43342
chr1	187439710	187439763	TARDBP_K562_rep02	2.7692	1.43342
chr1	187126368	187126451	MATR3_K562_rep01	2.8394	1.43109
chr1	187210815	187210861	MATR3_K562_rep01	2.8394	1.43109
chr1	187186376	187186412	ZC3H11A_K562_rep01	3.38045	1.42899
chr1	187115807	187115833	PCBP1_K562_rep02	3.36837	1.4211
chr1	187109073	187109111	PTBP1_K562_rep02	2.93932	1.41414
chr1	187216157	187216202	PTBP1_K562_rep02	2.93932	1.41414
chr1	187081135	187081176	NIPBL_K562_rep01	2.56356	1.40794
chr1	187101461	187101502	NIPBL_K562_rep01	2.56356	1.40794
chr1	187104987	187105030	NIPBL_K562_rep01	2.56356	1.40794
chr1	187149526	187149569	NIPBL_K562_rep01	2.56356	1.40794
chr1	187155590	187155634	NIPBL_K562_rep01	2.56356	1.40794
chr1	187139754	187139797	RBFOX2_K562_rep02	2.92577	1.40207
chr1	187134479	187134509	TROVE2_K562_rep02	3.07445	1.39914
chr1	187252656	187252666	EFTUD2_K562_rep01	3.32252	1.39133
chr1	187252666	187252700	EFTUD2_K562_rep01	3.32252	1.39133
chr1	187101404	187101448	LARP4_K562_rep02	2.49917	1.3577
chr1	187212540	187212556	PUM2_K562_rep02	2.76525	1.35457
chr1	187085067	187085180	KHSRP_K562_rep01	2.74973	1.35256
chr1	187162924	187163066	KHSRP_K562_rep01	2.74973	1.35256
chr1	187123821	187123828	ZRANB2_K562_rep01	2.75643	1.34873
chr1	187123828	187123850	ZRANB2_K562_rep01	2.75643	1.34873
chr1	187121734	187121838	KHSRP_K562_rep02	2.69943	1.3482
chr1	187135189	187135238	KHSRP_K562_rep02	2.69943	1.3482
chr1	187161037	187161109	KHSRP_K562_rep02	2.69943	1.3482
chr1	187236014	187236052	AGGF1_HepG2_rep02	2.18403	1.32708
chr1	187116139	187116196	ILF3_K562_rep02	2.7057	1.31981
chr1	187168891	187168939	ILF3_K562_rep02	2.7057	1.31981
chr1	187064143	187064216	KHDRBS1_K562_rep01	2.60205	1.31972
chr1	187102549	187102614	KHDRBS1_K562_rep01	2.60205	1.31972
chr1	187152882	187152940	KHDRBS1_K562_rep01	2.60205	1.31972
chr1	187102664	187102729	KHDRBS1_K562_rep01	2.70896	1.31623
chr1	187151123	187151169	KHDRBS1_K562_rep01	2.70896	1.31623
chr1	187104525	187104569	LARP4_K562_rep01	2.9464	1.30541
chr1	187110356	187110394	LARP4_K562_rep01	2.9464	1.30541
chr1	187126522	187126575	HNRNPM_K562_rep01	2.67892	1.30477
chr1	187104809	187104843	SAFB2_K562_rep01	2.6062	1.30303
chr1	187126359	187126415	MATR3_K562_rep02	2.80209	1.29627
chr1	187211006	187211079	MATR3_K562_rep02	2.80209	1.29627
chr1	187071375	187071461	AGGF1_K562_rep02	1.60783	1.29253
chr1	187095621	187095730	KHDRBS1_K562_rep01	2.07153	1.29103
chr1	187097466	187097515	SAFB2_K562_rep01	1.96877	1.28503
chr1	187100753	187100797	SAFB2_K562_rep01	2.70574	1.28333
chr1	187119215	187119264	EXOSC5_K562_rep01	2.84618	1.2829
chr1	187119418	187119462	EXOSC5_K562_rep01	2.84618	1.2829
chr1	187119509	187119547	EXOSC5_K562_rep02	2.84593	1.2828
chr1	187244309	187244356	EXOSC5_K562_rep02	2.84593	1.2828
chr1	187099879	187099918	NIPBL_K562_rep01	3.14852	1.28095
chr1	187129388	187129398	NIPBL_K562_rep01	3.14852	1.28095
chr1	187129398	187129429	NIPBL_K562_rep01	3.14852	1.28095
chr1	187150926	187150942	NIPBL_K562_rep01	3.14852	1.28095
chr1	187151313	187151345	NIPBL_K562_rep01	3.14852	1.28095
chr1	187151954	187151985	NIPBL_K562_rep01	3.14852	1.28095
chr1	187228354	187228392	NIPBL_K562_rep01	3.14852	1.28095
chr1	187219135	187219174	EFTUD2_K562_rep02	3.14166	1.27668
chr1	187087150	187087192	LARP4_K562_rep02	3.08414	1.24119
chr1	187102285	187102310	LARP4_K562_rep02	3.08414	1.24119
chr1	187103444	187103482	LARP4_K562_rep02	3.08414	1.24119
chr1	187104342	187104361	LARP4_K562_rep02	3.08414	1.24119
chr1	187197140	187197146	LARP4_K562_rep02	3.08414	1.24119
chr1	187197146	187197167	LARP4_K562_rep02	3.08414	1.24119
chr1	187260793	187260835	LARP4_K562_rep02	3.08414	1.24119
chr1	187298341	187298383	LARP4_K562_rep02	3.08414	1.24119
chr1	187236135	187236167	AKAP8L_K562_rep02	2.84921	1.23663
chr1	187103083	187103117	GNL3_K562_rep02	2.56431	1.22401
chr1	187236204	187236243	GTF2F1_K562_rep01	2.71049	1.22219
chr1	187084001	187084010	TBRG4_K562_rep01	2.9761	1.17583
chr1	187084010	187084039	TBRG4_K562_rep01	2.9761	1.17583
chr1	187236858	187236868	TBRG4_K562_rep01	2.9761	1.17583
chr1	187236868	187236899	TBRG4_K562_rep01	2.9761	1.17583
chr1	187114239	187114330	HNRNPL_K562_rep01	2.65113	1.17414
chr1	187062545	187062598	MATR3_K562_rep01	2.61701	1.17149
chr1	187068316	187068371	MATR3_K562_rep01	2.61701	1.17149
chr1	187115306	187115341	DROSHA_K562_rep02	2.96822	1.17113
chr1	187119431	187119466	AQR_K562_rep02	2.96708	1.17045
chr1	187170729	187170761	AQR_K562_rep02	2.96708	1.17045
chr1	187223688	187223718	AQR_K562_rep02	2.96708	1.17045
chr1	187240078	187240115	AQR_K562_rep02	2.96708	1.17045
chr1	187189928	187189961	CPEB4_K562_rep01	2.47361	1.16695
chr1	187155382	187155455	KHSRP_K562_rep01	2.50872	1.15468
chr1	187298192	187298279	KHSRP_K562_rep01	2.50872	1.15468
chr1	187125226	187125300	KHSRP_K562_rep02	2.45842	1.13803
chr1	187125300	187125368	KHSRP_K562_rep02	2.45842	1.13803
chr1	187129961	187130007	KHSRP_K562_rep02	2.45842	1.13803
chr1	187140039	187140118	KHSRP_K562_rep02	2.45842	1.13803
chr1	187161910	187161996	KHSRP_K562_rep02	2.58395	1.13556
chr1	187164360	187164415	KHSRP_K562_rep02	2.58395	1.13556
chr1	187105410	187105454	SAFB2_K562_rep02	2.55424	1.13498
chr1	187107743	187107811	SAFB2_K562_rep02	2.55424	1.13498
chr1	187261201	187261207	DDX52_K562_rep01	2.4185	1.13287
chr1	187261207	187261228	DDX52_K562_rep01	2.4185	1.13287
chr1	187115616	187115719	KHSRP_K562_rep01	2.63425	1.13186
chr1	187129357	187129422	KHSRP_K562_rep01	2.63425	1.13186
chr1	187235913	187235958	GTF2F1_K562_rep02	2.68737	1.12676
chr1	187135054	187135091	AKAP1_K562_rep01	2.40828	1.12661
chr1	187103739	187103798	KHDRBS1_K562_rep01	2.48657	1.12625
chr1	187240476	187240484	ZC3H11A_K562_rep02	2.66411	1.11145
chr1	187240484	187240513	ZC3H11A_K562_rep02	2.66411	1.11145
chr1	187445959	187445969	ZC3H11A_K562_rep02	2.66411	1.11145
chr1	187445969	187446000	ZC3H11A_K562_rep02	2.66411	1.11145
chr1	187079378	187079408	ZC3H11A_K562_rep01	2.38045	1.10961
chr1	187439707	187439761	TARDBP_K562_rep01	2.56256	1.10693
chr1	187101926	187101967	SAFB2_K562_rep01	2.49929	1.10452
chr1	187444940	187444985	SF3B4_K562_rep01	2.84747	1.10031
chr1	187184797	187184814	PTBP1_K562_rep01	2.84685	1.09995
chr1	187414526	187414557	PTBP1_K562_rep01	2.84685	1.09995
chr1	187079543	187079631	KHDRBS1_K562_rep02	2.42745	1.09433
chr1	187282013	187282158	KHDRBS1_K562_rep02	2.42745	1.09433
chr1	187116043	187116100	ILF3_K562_rep02	2.51305	1.08794
chr1	187154268	187154344	ILF3_K562_rep02	2.51305	1.08794
chr1	187129642	187129658	PTBP1_K562_rep02	2.61739	1.08107
chr1	187153670	187153705	PTBP1_K562_rep02	2.61739	1.08107
chr1	187191878	187191916	PTBP1_K562_rep02	2.61739	1.08107
chr1	187210527	187210567	PTBP1_K562_rep02	2.61739	1.08107
chr1	187146093	187146119	NPM1_K562_rep02	2.80767	1.07745
chr1	187168428	187168479	HNRNPM_K562_rep01	2.48628	1.07662
chr1	187253850	187253885	SUB1_HepG2_rep01	2.79032	1.06757
chr1	187062528	187062592	MATR3_K562_rep02	2.63217	1.05831
chr1	187124889	187124952	MATR3_K562_rep02	2.63217	1.05831
chr1	187129398	187129454	MATR3_K562_rep02	2.63217	1.05831
chr1	187105505	187105561	UCHL5_K562_rep01	2.8356	1.05505
chr1	187162259	187162294	DDX55_K562_rep02	2.75553	1.04789
chr1	187236202	187236245	HNRNPL_K562_rep01	1.60674	1.03564
chr1	187149608	187149670	ILF3_K562_rep01	2.4461	1.02926
chr1	187087522	187087550	XRCC6_K562_rep01	2.72221	1.02923
chr1	187158712	187158749	XRCC6_K562_rep01	2.72221	1.02923
chr1	187152905	187152940	NCBP2_K562_rep01	2.6878	1.01015
chr1	187168011	187168041	EXOSC5_K562_rep01	2.58315	1.0053
chr1	187167357	187167446	HNRNPL_K562_rep01	1.77666	0.997122
chr1	187139981	187140013	TROVE2_K562_rep02	2.65942	0.994543
chr1	187147810	187147838	TROVE2_K562_rep02	2.65942	0.994543
chr1	187083377	187083409	PUS1_K562_rep02	2.65733	0.993403
chr1	187124042	187124062	PUS1_K562_rep02	2.65733	0.993403
chr1	187253261	187253299	PUS1_K562_rep02	2.65733	0.993403
chr1	187101928	187101965	XRCC6_K562_rep02	2.16819	0.983999
chr1	187282852	187282878	XRCC6_K562_rep02	2.16819	0.983999
chr1	187077302	187077349	SND1_K562_rep01	2.49908	0.97662
chr1	187089315	187089364	SND1_K562_rep01	2.49908	0.97662
chr1	187088372	187088400	NIPBL_K562_rep01	2.14852	0.972723
chr1	187096942	187096978	NIPBL_K562_rep01	2.14852	0.972723
chr1	187097405	187097429	NIPBL_K562_rep01	2.14852	0.972723
chr1	187101810	187101837	NIPBL_K562_rep01	2.14852	0.972723
chr1	187129722	187129768	KHSRP_K562_rep01	1.74973	0.97252
chr1	187298186	187298276	KHSRP_K562_rep02	1.80634	0.961205
chr1	187120835	187120953	KHSRP_K562_rep01	1.85664	0.959546
chr1	187087001	187087066	SAFB2_K562_rep02	1.77663	0.959351
chr1	187098966	187099022	SAFB2_K562_rep02	1.77663	0.959351
chr1	187125067	187125087	DDX3X_K562_rep02	2.58239	0.952867
chr1	187114934	187115047	KHSRP_K562_rep01	2.37122	0.951631
chr1	187129846	187129881	KHSRP_K562_rep02	2.32092	0.943756
chr1	187164162	187164211	KHSRP_K562_rep02	2.32092	0.943756
chr1	187084757	187084816	SAFB2_K562_rep02	2.2912	0.937354
chr1	187097421	187097465	SAFB2_K562_rep02	2.2912	0.937354
chr1	187097554	187097596	SAFB2_K562_rep02	2.2912	0.937354
chr1	187083909	187083917	LARP4_K562_rep02	2.08414	0.936266
chr1	187105048	187105077	LARP4_K562_rep02	2.08414	0.936266
chr1	187225061	187225115	QKI_K562_rep02	1.99362	0.935305
chr1	187078765	187078787	LARP4_K562_rep01	2.53136	0.925795
chr1	187084806	187084843	LARP4_K562_rep01	2.53136	0.925795
chr1	187101500	187101528	LARP4_K562_rep01	2.53136	0.925795
chr1	187197121	187197157	LARP4_K562_rep01	2.53136	0.925795
chr1	187107762	187107811	HNRNPL_K562_rep02	2.36665	0.924407
chr1	187170775	187170902	HNRNPL_K562_rep02	2.36665	0.924407
chr1	187070918	187070968	KHDRBS1_K562_rep01	2.36104	0.924246
chr1	187105808	187105862	KHDRBS1_K562_rep01	2.36104	0.924246
chr1	187151256	187151296	KHDRBS1_K562_rep01	2.36104	0.924246
chr1	187320876	187320961	KHDRBS1_K562_rep01	2.36104	0.924246
chr1	187097131	187097159	SAFB2_K562_rep02	2.42871	0.922654
chr1	187103384	187103397	SAFB2_K562_rep02	2.42871	0.922654
chr1	187210740	187210780	PTBP1_K562_rep02	1.93932	0.917429
chr1	187062783	187062832	MATR3_K562_rep01	2.35397	0.91739
chr1	187122707	187122737	MATR3_K562_rep01	2.35397	0.91739
chr1	187129620	187129651	MATR3_K562_rep01	2.35397	0.91739
chr1	187139918	187139969	MATR3_K562_rep01	2.35397	0.91739
chr1	187211012	187211051	MATR3_K562_rep01	2.35397	0.91739
chr1	187121634	187121677	MATR3_K562_rep01	2.35397	0.91739
chr1	187083402	187083473	SAFB2_K562_rep01	2.25828	0.912346
chr1	187102936	187102971	SAFB2_K562_rep01	2.25828	0.912346
chr1	187087238	187087267	FTO_K562_rep01	2.49876	0.908728
chr1	187130364	187130398	FTO_K562_rep01	2.49876	0.908728
chr1	187172108	187172138	GPKOW_K562_rep02	1.8215	0.900667
chr1	187325538	187325584	KHDRBS1_K562_rep02	2.31197	0.899963
chr1	187073387	187073440	AGGF1_K562_rep02	2.49235	0.898421
chr1	187087004	187087050	AGGF1_K562_rep02	2.49235	0.898421
chr1	187174791	187174855	SAFB2_K562_rep01	2.38381	0.897973
chr1	187225307	187225463	SAFB2_K562_rep01	2.38381	0.897973
chr1	187253248	187253276	TROVE2_K562_rep01	2.46373	0.890585
chr1	187268235	187268261	TROVE2_K562_rep01	2.46373	0.890585
chr1	187079369	187079378	ZC3H11A_K562_rep01	1.79548	0.885927
chr1	187066109	187066118	AKAP8L_K562_rep02	2.43417	0.875434
chr1	187066118	187066147	AKAP8L_K562_rep02	2.43417	0.875434
chr1	187088044	187088052	AKAP8L_K562_rep02	2.43417	0.875434
chr1	187099667	187099692	AKAP8L_K562_rep02	2.43417	0.875434
chr1	187102090	187102128	AKAP8L_K562_rep02	2.43417	0.875434
chr1	187319868	187319893	AKAP8L_K562_rep02	2.43417	0.875434
chr1	187086325	187086369	DROSHA_K562_rep02	1.96822	0.87239
chr1	187119492	187119514	DROSHA_K562_rep02	1.96822	0.87239
chr1	187170719	187170729	AQR_K562_rep02	1.96708	0.871774
chr1	187178741	187178782	TARDBP_K562_rep01	2.34017	0.871597
chr1	187066175	187066205	EIF4G2_K562_rep02	2.40088	0.858553
chr1	187131906	187131938	EIF4G2_K562_rep02	2.40088	0.858553
chr1	187144622	187144674	ILF3_K562_rep02	2.29066	0.858362
chr1	187140686	187140717	AKAP1_K562_rep02	2.39151	0.853837
chr1	187118307	187118354	HNRNPM_K562_rep01	2.26389	0.850419
chr1	187121821	187121880	HNRNPM_K562_rep01	2.26389	0.850419
chr1	187140362	187140416	HNRNPM_K562_rep01	2.26389	0.850419
chr1	187168255	187168294	HNRNPM_K562_rep01	2.26389	0.850419
chr1	187190170	187190219	HNRNPM_K562_rep01	2.26389	0.850419
chr1	187126431	187126473	MATR3_K562_rep02	2.21713	0.835353
chr1	187130261	187130316	MATR3_K562_rep02	2.21713	0.835353
chr1	187077045	187077150	MATR3_K562_rep02	2.43952	0.82508
chr1	187190558	187190640	MATR3_K562_rep02	2.43952	0.82508
chr1	187089911	187089952	ZC3H8_K562_rep01	2.32825	0.822373
chr1	187123349	187123410	HNRNPK_K562_rep02	2.28724	0.817124
chr1	187138473	187138507	TBRG4_K562_rep02	2.31202	0.814415
chr1	187139750	187139786	TBRG4_K562_rep02	2.31202	0.814415
chr1	187260561	187260602	TBRG4_K562_rep02	2.31202	0.814415
chr1	187431386	187431427	TBRG4_K562_rep02	2.31202	0.814415
chr1	187444984	187444994	TBRG4_K562_rep02	2.31202	0.814415
chr1	187444994	187445025	TBRG4_K562_rep02	2.31202	0.814415
chr1	187099929	187099954	SLTM_K562_rep01	2.30477	0.810872
chr1	187110428	187110457	SLTM_K562_rep01	2.30477	0.810872
chr1	187115256	187115282	PTBP1_K562_rep01	1.84685	0.807994
chr1	187155389	187155405	PTBP1_K562_rep01	1.84685	0.807994
chr1	187086389	187086421	GTF2F1_K562_rep02	2.27234	0.79514
chr1	187120084	187120147	KHSRP_K562_rep02	1.58395	0.787763
chr1	187160298	187160368	KHSRP_K562_rep02	1.58395	0.787763
chr1	187412886	187412963	KHSRP_K562_rep02	1.58395	0.787763
chr1	187079186	187079206	QKI_K562_rep02	2.25665	0.787599
chr1	187199873	187199897	QKI_K562_rep02	2.25665	0.787599
chr1	187231429	187231437	QKI_K562_rep02	2.25665	0.787599
chr1	187073041	187073131	SAFB2_K562_rep02	1.55424	0.781701
chr1	187097471	187097520	SAFB2_K562_rep02	1.55424	0.781701
chr1	187102968	187102987	SAFB2_K562_rep02	1.55424	0.781701
chr1	187139740	187139791	DDX6_K562_rep02	2.55665	0.781297
chr1	187129970	187130013	TARDBP_K562_rep02	2.11712	0.780868
chr1	187178742	187178791	TARDBP_K562_rep02	2.11712	0.780868
chr1	187101831	187101871	UCHL5_K562_rep01	2.51367	0.777671
chr1	187105244	187105297	UCHL5_K562_rep01	2.51367	0.777671
chr1	187086939	187087001	SAFB2_K562_rep02	1.66972	0.777486
chr1	187071367	187071438	HNRNPL_K562_rep02	1.60766	0.775943
chr1	187311079	187311224	HNRNPL_K562_rep02	1.60766	0.775943
chr1	187129732	187129785	KHSRP_K562_rep02	1.69943	0.775839
chr1	187155609	187155670	KHSRP_K562_rep02	1.69943	0.775839
chr1	187170849	187170899	HNRNPL_K562_rep01	2.1917	0.771242
chr1	187236137	187236173	HNRNPL_K562_rep01	2.1917	0.771242
chr1	187147821	187147850	DDX55_K562_rep02	1.75553	0.76126
chr1	187099794	187099839	SAFB2_K562_rep01	1.6062	0.761073
chr1	187069342	187069372	NIPBL_K562_rep01	1.56356	0.759762
chr1	187101925	187101968	RBFOX2_K562_rep01	2.05511	0.746277
chr1	187129205	187129248	KHSRP_K562_rep01	2.04929	0.744843
chr1	187153844	187153892	KHSRP_K562_rep01	2.04929	0.744843
chr1	187163129	187163215	KHSRP_K562_rep01	2.04929	0.744843
chr1	187165009	187165079	KHSRP_K562_rep01	2.04929	0.744843
chr1	187270397	187270472	KHSRP_K562_rep01	2.04929	0.744843
chr1	187085127	187085185	KHSRP_K562_rep02	2.16891	0.743197
chr1	187114938	187115043	KHSRP_K562_rep02	2.16891	0.743197
chr1	187129328	187129358	KHSRP_K562_rep02	2.16891	0.743197
chr1	187149772	187149842	KHSRP_K562_rep02	2.16891	0.743197
chr1	187164982	187165059	KHSRP_K562_rep02	2.16891	0.743197
chr1	187082164	187082251	SAFB2_K562_rep02	2.1392	0.741069
chr1	187098741	187098781	SAFB2_K562_rep02	2.1392	0.741069
chr1	187156638	187156732	SAFB2_K562_rep02	2.1392	0.741069
chr1	187276147	187276209	SAFB2_K562_rep02	2.1392	0.741069
chr1	187326818	187326910	SAFB2_K562_rep02	2.1392	0.741069
chr1	187068310	187068355	EXOSC5_K562_rep01	2.26122	0.734495
chr1	187068519	187068565	EXOSC5_K562_rep01	2.26122	0.734495
chr1	187117957	187117989	EXOSC5_K562_rep01	2.26122	0.734495
chr1	187118313	187118343	EXOSC5_K562_rep01	2.26122	0.734495
chr1	187118816	187118855	EXOSC5_K562_rep01	2.26122	0.734495
chr1	187125069	187125112	EXOSC5_K562_rep01	2.26122	0.734495
chr1	187126197	187126225	EXOSC5_K562_rep01	2.26122	0.734495
chr1	187243815	187243838	EXOSC5_K562_rep01	2.26122	0.734495
chr1	187119437	187119467	EXOSC5_K562_rep02	2.26097	0.734436
chr1	187119727	187119764	EXOSC5_K562_rep02	2.26097	0.734436
chr1	187125221	187125263	EXOSC5_K562_rep02	2.26097	0.734436
chr1	187125933	187125952	EXOSC5_K562_rep02	2.26097	0.734436
chr1	187168260	187168294	EXOSC5_K562_rep02	2.26097	0.734436
chr1	187114252	187114319	HNRNPL_K562_rep02	2.07714	0.733603
chr1	187116835	187116909	HNRNPL_K562_rep02	2.07714	0.733603
chr1	187262689	187262766	HNRNPL_K562_rep02	2.07714	0.733603
chr1	187072497	187072549	HNRNPL_K562_rep02	2.07714	0.733603
chr1	187079542	187079615	KHDRBS1_K562_rep01	2.07153	0.732736
chr1	187095800	187095857	KHDRBS1_K562_rep01	2.07153	0.732736
chr1	187183233	187183275	KHDRBS1_K562_rep01	2.07153	0.732736
chr1	187321635	187321691	KHDRBS1_K562_rep01	2.07153	0.732736
chr1	187083917	187083944	LARP4_K562_rep02	1.49917	0.726467
chr1	187097074	187097111	SAFB2_K562_rep01	2.12077	0.71963
chr1	187097153	187097184	SAFB2_K562_rep01	2.12077	0.71963
chr1	187145751	187145797	DROSHA_K562_rep02	1.12022	0.719005
chr1	187321896	187321954	KHDRBS1_K562_rep01	2.22354	0.717954
chr1	187325337	187325383	KHDRBS1_K562_rep01	2.22354	0.717954
chr1	187070577	187070644	HNRNPL_K562_rep02	2.22914	0.717512
chr1	187108024	187108072	HNRNPL_K562_rep02	2.22914	0.717512
chr1	187131904	187131987	HNRNPL_K562_rep02	2.22914	0.717512
chr1	187210526	187210611	HNRNPL_K562_rep02	2.22914	0.717512
chr1	187234952	187235011	KHDRBS1_K562_rep02	2.04894	0.713757
chr1	187286310	187286374	KHDRBS1_K562_rep02	2.04894	0.713757
chr1	187108058	187108104	SND1_K562_rep01	2.17715	0.71309
chr1	187178115	187178156	SND1_K562_rep01	2.17715	0.71309
chr1	187192315	187192362	SND1_K562_rep01	2.17715	0.71309
chr1	187097058	187097102	AKAP8L_K562_rep02	1.84921	0.708121
chr1	187149531	187149636	ILF3_K562_rep02	1.51305	0.699139
chr1	187073567	187073625	KHDRBS1_K562_rep02	2.18644	0.698665
chr1	187128011	187128047	KHDRBS1_K562_rep02	2.18644	0.698665
chr1	187152873	187152943	KHDRBS1_K562_rep02	2.18644	0.698665
chr1	187116058	187116101	GTF2F1_K562_rep01	2.12553	0.698607
chr1	187146735	187146780	HNRNPK_K562_rep01	2.03599	0.67152
chr1	187062905	187062945	MATR3_K562_rep01	2.03204	0.670276
chr1	187119608	187119658	MATR3_K562_rep01	2.03204	0.670276
chr1	187120259	187120287	MATR3_K562_rep01	2.03204	0.670276
chr1	187189590	187189628	MATR3_K562_rep01	2.03204	0.670276
chr1	187190905	187190949	MATR3_K562_rep01	2.03204	0.670276
chr1	187191879	187191924	MATR3_K562_rep01	2.03204	0.670276
chr1	187086374	187086409	UCHL5_K562_rep02	2.0206	0.666651
chr1	187104819	187104863	UCHL5_K562_rep02	2.0206	0.666651
chr1	187137916	187137959	UCHL5_K562_rep02	2.0206	0.666651
chr1	187062401	187062445	TAF15_K562_rep01	2.00608	0.66201
chr1	187194214	187194264	MTPAP_K562_rep01	2.25681	0.658633
chr1	187322489	187322530	NOLC1_K562_rep01	2.23136	0.657313
chr1	187234993	187235035	AGGF1_K562_rep02	2.22932	0.657189
chr1	187115991	187116036	CSTF2T_K562_rep01	2.16451	0.651845
chr1	187143773	187143822	ILF3_K562_rep02	2.02763	0.632218
chr1	187149798	187149856	ILF3_K562_rep02	2.02763	0.632218
chr1	187126444	187126480	HNRNPM_K562_rep01	2.00085	0.627182
chr1	187168023	187168055	HNRNPM_K562_rep01	2.00085	0.627182
chr1	187168379	187168406	HNRNPM_K562_rep01	2.00085	0.627182
chr1	187190441	187190485	HNRNPM_K562_rep01	2.00085	0.627182
chr1	187191574	187191621	HNRNPM_K562_rep01	2.00085	0.627182
chr1	187124886	187124925	HNRNPM_K562_rep02	1.99502	0.626038
chr1	187098482	187098521	UCHL5_K562_rep01	1.51367	0.62444
chr1	187156942	187156986	IGF2BP1_K562_rep02	1.97201	0.621366
chr1	187109063	187109111	MATR3_K562_rep02	1.95409	0.617557
chr1	187120473	187120519	MATR3_K562_rep02	1.95409	0.617557
chr1	187122839	187122868	MATR3_K562_rep02	1.95409	0.617557
chr1	187168414	187168463	MATR3_K562_rep02	1.95409	0.617557
chr1	187135052	187135105	TIA1_K562_rep01	1.93765	0.613936
chr1	187104065	187104084	SAFB2_K562_rep02	1.42871	0.6134
chr1	187091198	187091258	KHDRBS1_K562_rep01	1.48657	0.601618
chr1	187208541	187208648	KHDRBS1_K562_rep02	1.42745	0.589258
chr1	187106465	187106523	TARDBP_K562_rep02	1.89473	0.58021
chr1	187078952	187079003	HNRNPL_K562_rep01	1.99905	0.564782
chr1	187082137	187082200	HNRNPL_K562_rep01	1.99905	0.564782
chr1	187131928	187131979	HNRNPL_K562_rep01	1.99905	0.564782
chr1	187321619	187321679	CSTF2T_K562_rep02	1.99606	0.564707
chr1	187210999	187211049	PTBP1_K562_rep02	1.35435	0.556636
chr1	187136681	187136739	KHSRP_K562_rep01	1.85664	0.554623
chr1	187161899	187161987	KHSRP_K562_rep01	1.85664	0.554623
chr1	187164254	187164293	KHSRP_K562_rep01	1.85664	0.554623
chr1	187062401	187062454	KHSRP_K562_rep02	1.80634	0.548011
chr1	187064774	187064831	KHSRP_K562_rep02	1.80634	0.548011
chr1	187089325	187089421	KHSRP_K562_rep02	1.80634	0.548011
chr1	187160614	187160642	KHSRP_K562_rep02	1.80634	0.548011
chr1	187162970	187163049	KHSRP_K562_rep02	1.80634	0.548011
chr1	187179027	187179094	KHSRP_K562_rep02	1.80634	0.548011
chr1	187215493	187215555	KHSRP_K562_rep02	1.80634	0.548011
chr1	187264640	187264717	KHSRP_K562_rep02	1.80634	0.548011
chr1	187329149	187329192	KHSRP_K562_rep02	1.80634	0.548011
chr1	187445827	187445904	KHSRP_K562_rep02	1.80634	0.548011
chr1	187085134	187085171	SAFB2_K562_rep02	1.77663	0.543438
chr1	187094405	187094473	SAFB2_K562_rep02	1.77663	0.543438
chr1	187096798	187096828	SAFB2_K562_rep02	1.77663	0.543438
chr1	187098610	187098632	SAFB2_K562_rep02	1.77663	0.543438
chr1	187182689	187182741	SAFB2_K562_rep02	1.77663	0.543438
chr1	187208291	187208345	SAFB2_K562_rep02	1.77663	0.543438
chr1	187322605	187322696	SAFB2_K562_rep02	1.77663	0.543438
chr1	187096372	187096404	SAFB2_K562_rep02	1.96928	0.541343
chr1	187096552	187096581	SAFB2_K562_rep02	1.96928	0.541343
chr1	187099134	187099157	SAFB2_K562_rep02	1.96928	0.541343
chr1	187113076	187113102	SAFB2_K562_rep02	1.96928	0.541343
chr1	187150732	187150782	SAFB2_K562_rep02	1.96928	0.541343
chr1	187152139	187152192	SAFB2_K562_rep02	1.96928	0.541343
chr1	187197488	187197572	SAFB2_K562_rep02	1.96928	0.541343
chr1	187135393	187135432	KHSRP_K562_rep02	1.99899	0.540769
chr1	187072359	187072406	HNRNPL_K562_rep02	1.90722	0.54053
chr1	187084014	187084070	KHDRBS1_K562_rep01	1.90161	0.540325
chr1	187097555	187097617	KHDRBS1_K562_rep01	1.90161	0.540325
chr1	187112828	187112935	KHDRBS1_K562_rep01	1.90161	0.540325
chr1	187128081	187128119	KHDRBS1_K562_rep01	1.90161	0.540325
chr1	187175152	187175199	KHDRBS1_K562_rep01	1.90161	0.540325
chr1	187240662	187240744	KHDRBS1_K562_rep01	1.90161	0.540325
chr1	187281322	187281383	KHDRBS1_K562_rep01	1.90161	0.540325
chr1	187103026	187103096	SAFB_K562_rep02	1.8249	0.535386
chr1	187098748	187098783	SAFB2_K562_rep01	1.79885	0.532841
chr1	187101069	187101091	SAFB2_K562_rep01	1.79885	0.532841
chr1	187102106	187102135	SAFB2_K562_rep01	1.79885	0.532841
chr1	187106453	187106520	SAFB2_K562_rep01	1.79885	0.532841
chr1	187070921	187070961	KHDRBS1_K562_rep02	1.89694	0.524269
chr1	187072922	187072958	KHDRBS1_K562_rep02	1.89694	0.524269
chr1	187127401	187127460	KHDRBS1_K562_rep02	1.89694	0.524269
chr1	187133410	187133482	KHDRBS1_K562_rep02	1.89694	0.524269
chr1	187151587	187151634	KHDRBS1_K562_rep02	1.89694	0.524269
chr1	187240678	187240807	KHDRBS1_K562_rep02	1.89694	0.524269
chr1	187304367	187304427	KHDRBS1_K562_rep02	1.89694	0.524269
chr1	187328428	187328508	KHDRBS1_K562_rep02	1.89694	0.524269
chr1	187084744	187084787	SAFB2_K562_rep01	1.96877	0.522618
chr1	187097766	187097793	SAFB2_K562_rep01	1.96877	0.522618
chr1	187098972	187099008	SAFB2_K562_rep01	1.96877	0.522618
chr1	187105055	187105066	SAFB2_K562_rep01	1.96877	0.522618
chr1	187152144	187152211	SAFB2_K562_rep01	1.96877	0.522618
chr1	187103046	187103120	SAFB_K562_rep01	1.98511	0.521724
chr1	187100341	187100391	SAFB_K562_rep02	1.99482	0.521103
chr1	187441465	187441472	APOBEC3C_K562_rep01	2.25	0.514692
chr1	187441472	187441503	APOBEC3C_K562_rep01	2.25	0.514692
chr1	187062975	187063010	ZC3H11A_K562_rep02	2.24907	0.514653
chr1	187079706	187079735	ZC3H11A_K562_rep02	2.24907	0.514653
chr1	187101925	187101966	ZC3H11A_K562_rep02	2.24907	0.514653
chr1	187104404	187104439	ZC3H11A_K562_rep02	2.24907	0.514653
chr1	187161999	187162008	ZC3H11A_K562_rep02	2.24907	0.514653
chr1	187162008	187162038	ZC3H11A_K562_rep02	2.24907	0.514653
chr1	187209468	187209478	ZC3H11A_K562_rep02	2.24907	0.514653
chr1	187209478	187209510	ZC3H11A_K562_rep02	2.24907	0.514653
chr1	187246560	187246600	ZC3H11A_K562_rep02	2.24907	0.514653
chr1	187320595	187320623	ZC3H11A_K562_rep02	2.24907	0.514653
chr1	187446306	187446320	ZC3H11A_K562_rep02	2.24907	0.514653
chr1	187140189	187140221	PTBP1_K562_rep02	2.20235	0.512341
chr1	187140438	187140467	PTBP1_K562_rep02	2.20235	0.512341
chr1	187174347	187174370	PTBP1_K562_rep02	2.20235	0.512341
chr1	187182570	187182585	PTBP1_K562_rep02	2.20235	0.512341
chr1	187189879	187189907	PTBP1_K562_rep02	2.20235	0.512341
chr1	187210908	187210935	PTBP1_K562_rep02	2.20235	0.512341
chr1	187414085	187414094	PTBP1_K562_rep02	2.20235	0.512341
chr1	187119509	187119551	DDX6_K562_rep02	2.14162	0.508289
chr1	187163864	187163874	DDX6_K562_rep02	2.14162	0.508289
chr1	187099508	187099589	PPIL4_K562_rep01	1.97184	0.506635
chr1	187103496	187103586	PPIL4_K562_rep01	1.97184	0.506635
chr1	187100026	187100058	UCHL5_K562_rep01	2.09864	0.504726
chr1	187104174	187104204	UCHL5_K562_rep01	2.09864	0.504726
chr1	187111345	187111376	UCHL5_K562_rep01	2.09864	0.504726
chr1	187062957	187062967	DGCR8_K562_rep02	2.08858	0.50381
chr1	187062967	187062998	DGCR8_K562_rep02	2.08858	0.50381
chr1	187118216	187118265	EXOSC5_K562_rep02	1.26097	0.500038
chr1	187094899	187094946	ILF3_K562_rep01	1.25346	0.484909
chr1	187075686	187075707	METAP2_K562_rep01	1.91354	0.483256
chr1	187084924	187084932	NCBP2_K562_rep02	1.89768	0.480994
chr1	187084932	187084960	NCBP2_K562_rep02	1.89768	0.480994
chr1	187126337	187126358	NCBP2_K562_rep02	1.89768	0.480994
chr1	187144134	187144169	CPSF6_K562_rep02	1.88274	0.478806
chr1	187150723	187150762	SND1_K562_rep02	1.88035	0.478452
chr1	187156249	187156282	XRN2_K562_rep01	1.87026	0.476938
chr1	187118493	187118519	EXOSC5_K562_rep01	1.84618	0.473233
chr1	187119526	187119557	EXOSC5_K562_rep01	1.84618	0.473233
chr1	187122783	187122797	EXOSC5_K562_rep01	1.84618	0.473233
chr1	187167844	187167879	EXOSC5_K562_rep01	1.84618	0.473233
chr1	187168750	187168761	EXOSC5_K562_rep01	1.84618	0.473233
chr1	187302492	187302513	EXOSC5_K562_rep01	1.84618	0.473233
chr1	187068171	187068195	EXOSC5_K562_rep02	1.84593	0.473194
chr1	187069325	187069362	EXOSC5_K562_rep02	1.84593	0.473194
chr1	187118830	187118834	EXOSC5_K562_rep02	1.84593	0.473194
chr1	187120490	187120524	EXOSC5_K562_rep02	1.84593	0.473194
chr1	187191781	187191803	EXOSC5_K562_rep02	1.84593	0.473194
chr1	187243126	187243150	EXOSC5_K562_rep02	1.84593	0.473194
chr1	187243274	187243295	EXOSC5_K562_rep02	1.84593	0.473194
chr1	187106449	187106554	KHDRBS1_K562_rep01	0.901608	0.468763
chr1	187065994	187066024	ZRANB2_K562_rep02	1.59622	0.467597
chr1	187069719	187069747	SND1_K562_rep01	1.76211	0.459327
chr1	187115624	187115649	SND1_K562_rep01	1.76211	0.459327
chr1	187140616	187140650	SND1_K562_rep01	1.76211	0.459327
chr1	187156268	187156305	SND1_K562_rep01	1.76211	0.459327
chr1	187194208	187194236	SND1_K562_rep01	1.76211	0.459327
chr1	187206450	187206484	SND1_K562_rep01	1.76211	0.459327
chr1	187437422	187437432	SND1_K562_rep01	1.76211	0.459327
chr1	187437432	187437466	SND1_K562_rep01	1.76211	0.459327
chr1	187445755	187445784	SND1_K562_rep01	1.76211	0.459327
chr1	187071372	187071439	HNRNPL_K562_rep01	1.36162	0.458805
chr1	187085347	187085381	FTO_K562_rep01	1.49876	0.457053
chr1	187155610	187155673	KHSRP_K562_rep01	1.21921	0.453477
chr1	187195212	187195322	KHSRP_K562_rep01	1.21921	0.453477
chr1	187065967	187066005	NSUN2_K562_rep01	1.72833	0.453352
chr1	187310908	187310913	NSUN2_K562_rep01	1.72833	0.453352
chr1	187310913	187310935	NSUN2_K562_rep01	1.72833	0.453352
chr1	187088121	187088150	GTF2F1_K562_rep01	1.71049	0.450115
chr1	187196910	187196945	GTF2F1_K562_rep01	1.71049	0.450115
chr1	187088052	187088080	AKAP8L_K562_rep02	1.43417	0.448531
chr1	187104419	187104452	AKAP8L_K562_rep02	1.43417	0.448531
chr1	187070603	187070642	TBRG4_K562_rep01	1.39114	0.447771
chr1	187071739	187071771	DROSHA_K562_rep02	1.38326	0.447042
chr1	187099800	187099823	SAFB2_K562_rep02	1.2912	0.445282
chr1	187155738	187155786	KHSRP_K562_rep02	1.32092	0.445111
chr1	187224957	187224980	FMR1_K562_rep02	1.63922	0.436677
chr1	187321648	187321667	FMR1_K562_rep02	1.63922	0.436677
chr1	187098120	187098161	SAFB2_K562_rep01	1.25828	0.43457
chr1	187100179	187100203	SAFB2_K562_rep01	1.25828	0.43457
chr1	187107758	187107790	MATR3_K562_rep01	1.61701	0.432338
chr1	187118491	187118524	MATR3_K562_rep01	1.61701	0.432338
chr1	187120623	187120657	MATR3_K562_rep01	1.61701	0.432338
chr1	187121743	187121768	MATR3_K562_rep01	1.61701	0.432338
chr1	187126212	187126242	MATR3_K562_rep01	1.61701	0.432338
chr1	187130179	187130190	MATR3_K562_rep01	1.61701	0.432338
chr1	187140098	187140132	MATR3_K562_rep01	1.61701	0.432338
chr1	187140207	187140233	MATR3_K562_rep01	1.61701	0.432338
chr1	187145761	187145793	MATR3_K562_rep01	1.61701	0.432338
chr1	187168700	187168723	MATR3_K562_rep01	1.61701	0.432338
chr1	187189969	187190002	MATR3_K562_rep01	1.61701	0.432338
chr1	187190773	187190783	MATR3_K562_rep01	1.61701	0.432338
chr1	187191480	187191507	MATR3_K562_rep01	1.61701	0.432338
chr1	187210494	187210503	MATR3_K562_rep01	1.61701	0.432338
chr1	187070013	187070049	UCHL5_K562_rep02	1.60556	0.430078
chr1	187099810	187099835	UCHL5_K562_rep02	1.60556	0.430078
chr1	187099895	187099919	UCHL5_K562_rep02	1.60556	0.430078
chr1	187120479	187120522	UCHL5_K562_rep02	1.60556	0.430078
chr1	187152007	187152038	UCHL5_K562_rep02	1.60556	0.430078
chr1	187431153	187431184	UCHL5_K562_rep02	1.60556	0.430078
chr1	187436715	187436752	UCHL5_K562_rep02	1.60556	0.430078
chr1	187236022	187236049	GTF2F1_HepG2_rep02	1.59781	0.428537
chr1	187174755	187174789	TAF15_K562_rep01	1.59105	0.427187
chr1	187182254	187182279	TAF15_K562_rep01	1.59105	0.427187
chr1	187225651	187225680	TAF15_K562_rep01	1.59105	0.427187
chr1	187137484	187137509	LSM11_K562_rep02	1.5868	0.426338
chr1	187197182	187197209	LSM11_K562_rep02	1.5868	0.426338
chr1	187076641	187076680	TAF15_K562_rep02	1.99101	0.425955
chr1	187095268	187095309	TAF15_K562_rep02	1.99101	0.425955
chr1	187197848	187197885	TAF15_K562_rep02	1.99101	0.425955
chr1	187140645	187140691	RBFOX2_K562_rep02	1.92577	0.425012
chr1	187326860	187326901	RBFOX2_K562_rep02	1.92577	0.425012
chr1	187104405	187104441	AGGF1_K562_rep02	1.90739	0.424482
chr1	187107722	187107757	AGGF1_K562_rep02	1.90739	0.424482
chr1	187107934	187107962	AGGF1_K562_rep02	1.90739	0.424482
chr1	187170827	187170865	AGGF1_K562_rep02	1.90739	0.424482
chr1	187234257	187234300	AGGF1_K562_rep02	1.90739	0.424482
chr1	187237508	187237522	AGGF1_K562_rep02	1.90739	0.424482
chr1	187237963	187238018	AGGF1_K562_rep02	1.90739	0.424482
chr1	187262975	187263006	AGGF1_K562_rep02	1.90739	0.424482
chr1	187272984	187273016	AQR_K562_rep01	1.28017	0.423898
chr1	187095583	187095716	KHDRBS1_K562_rep02	1.31197	0.423764
chr1	187113371	187113417	CSTF2T_K562_rep01	1.84258	0.421696
chr1	187081508	187081545	FTO_K562_rep02	1.17613	0.420995
chr1	187086995	187087006	ZC3H11A_K562_rep02	1.24907	0.418282
chr1	187107169	187107204	ZC3H11A_K562_rep02	1.24907	0.418282
chr1	187188321	187188328	ZC3H11A_K562_rep02	1.24907	0.418282
chr1	187188328	187188352	ZC3H11A_K562_rep02	1.24907	0.418282
chr1	187206255	187206296	HNRNPUL1_K562_rep01	1.77419	0.417254
chr1	187123157	187123167	ZC3H8_K562_rep02	1.73998	0.414477
chr1	187123167	187123199	ZC3H8_K562_rep02	1.73998	0.414477
chr1	187065777	187065813	U2AF1_K562_rep01	1.72387	0.413045
chr1	187095244	187095289	ILF3_K562_rep02	1.7057	0.411339
chr1	187145030	187145062	ILF3_K562_rep02	1.7057	0.411339
chr1	187182516	187182528	PTBP1_K562_rep02	1.20235	0.409501
chr1	187209723	187209750	PTBP1_K562_rep02	1.20235	0.409501
chr1	187068166	187068217	HNRNPM_K562_rep01	1.67892	0.40865
chr1	187072731	187072775	HNRNPM_K562_rep01	1.67892	0.40865
chr1	187119080	187119111	HNRNPM_K562_rep01	1.67892	0.40865
chr1	187125320	187125344	HNRNPM_K562_rep01	1.67892	0.40865
chr1	187129159	187129202	HNRNPM_K562_rep01	1.67892	0.40865
chr1	187130190	187130208	HNRNPM_K562_rep01	1.67892	0.40865
chr1	187168097	187168120	HNRNPM_K562_rep01	1.67892	0.40865
chr1	187239465	187239520	HNRNPM_K562_rep01	1.67892	0.40865
chr1	187190446	187190473	HNRNPM_K562_rep02	1.67309	0.408037
chr1	187072922	187072951	TROVE2_K562_rep02	1.07445	0.403922
chr1	187062740	187062783	MATR3_K562_rep02	1.63217	0.403475
chr1	187078583	187078630	MATR3_K562_rep02	1.63217	0.403475
chr1	187120319	187120364	MATR3_K562_rep02	1.63217	0.403475
chr1	187120622	187120664	MATR3_K562_rep02	1.63217	0.403475
chr1	187121769	187121822	MATR3_K562_rep02	1.63217	0.403475
chr1	187122043	187122075	MATR3_K562_rep02	1.63217	0.403475
chr1	187122978	187123004	MATR3_K562_rep02	1.63217	0.403475
chr1	187124606	187124636	MATR3_K562_rep02	1.63217	0.403475
chr1	187129130	187129148	MATR3_K562_rep02	1.63217	0.403475
chr1	187139739	187139784	MATR3_K562_rep02	1.63217	0.403475
chr1	187153674	187153715	MATR3_K562_rep02	1.63217	0.403475
chr1	187154195	187154234	MATR3_K562_rep02	1.63217	0.403475
chr1	187168261	187168304	MATR3_K562_rep02	1.63217	0.403475
chr1	187191875	187191920	MATR3_K562_rep02	1.63217	0.403475
chr1	187209727	187209772	MATR3_K562_rep02	1.63217	0.403475
chr1	187142187	187142219	DROSHA_K562_rep02	0.968222	0.392692
chr1	187129867	187129929	KHSRP_K562_rep01	0.923757	0.390813
chr1	187103518	187103553	UCHL5_K562_rep01	1.09864	0.388737
chr1	187131543	187131583	HNRNPK_K562_rep02	1.80181	0.385816
chr1	187445187	187445243	HNRNPK_K562_rep02	1.80181	0.385816
chr1	187064095	187064142	ILF3_K562_rep01	1.76803	0.385368
chr1	187150154	187150181	ILF3_K562_rep01	1.76803	0.385368
chr1	187169324	187169359	ILF3_K562_rep01	1.76803	0.385368
chr1	187095806	187095863	SAFB2_K562_rep02	0.969275	0.384795
chr1	187062545	187062585	TIA1_K562_rep02	1.7316	0.38443
chr1	187062896	187062945	NONO_K562_rep01	1.72582	0.384238
chr1	187093635	187093716	KHDRBS1_K562_rep01	0.901608	0.382139
chr1	187171040	187171136	KHDRBS1_K562_rep01	0.901608	0.382139
chr1	187131812	187131873	TARDBP_K562_rep02	1.63169	0.379512
chr1	187101453	187101509	KHDRBS1_K562_rep01	1.01708	0.376242
chr1	187122835	187122870	EXOSC5_K562_rep01	1.26122	0.375721
chr1	187122839	187122880	EXOSC5_K562_rep02	1.26097	0.3757
chr1	187078205	187078247	HNRNPL_K562_rep01	1.51363	0.369577
chr1	187106349	187106398	HNRNPL_K562_rep01	1.51363	0.369577
chr1	187107735	187107781	HNRNPL_K562_rep01	1.51363	0.369577
chr1	187130297	187130331	HNRNPL_K562_rep01	1.51363	0.369577
chr1	187134339	187134383	HNRNPL_K562_rep01	1.51363	0.369577
chr1	187134434	187134492	HNRNPL_K562_rep01	1.51363	0.369577
chr1	187427311	187427363	HNRNPL_K562_rep01	1.51363	0.369577
chr1	187112720	187112775	CSTF2T_K562_rep02	1.77367	0.362373
chr1	187070761	187070807	HNRNPL_K562_rep01	1.77666	0.362308
chr1	187072359	187072421	HNRNPL_K562_rep01	1.77666	0.362308
chr1	187086435	187086501	HNRNPL_K562_rep01	1.77666	0.362308
chr1	187107936	187107986	HNRNPL_K562_rep01	1.77666	0.362308
chr1	187130514	187130570	HNRNPL_K562_rep01	1.77666	0.362308
chr1	187096587	187096658	RBFOX2_K562_rep01	1.64008	0.361911
chr1	187100076	187100103	RBFOX2_K562_rep01	1.64008	0.361911
chr1	187100602	187100643	RBFOX2_K562_rep01	1.64008	0.361911
chr1	187270068	187270123	KHSRP_K562_rep01	1.63425	0.361744
chr1	187101925	187101966	PPIL4_K562_rep02	1.62519	0.361459
chr1	187137353	187137396	LIN28B_K562_rep01	1.60955	0.360899
chr1	187136683	187136728	KHSRP_K562_rep02	1.58395	0.359798
chr1	187137490	187137534	KHSRP_K562_rep02	1.58395	0.359798
chr1	187155319	187155341	KHSRP_K562_rep02	1.58395	0.359798
chr1	187195285	187195344	KHSRP_K562_rep02	1.58395	0.359798
chr1	187269893	187269946	KHSRP_K562_rep02	1.58395	0.359798
chr1	187270418	187270459	KHSRP_K562_rep02	1.58395	0.359798
chr1	187071867	187071905	SAFB2_K562_rep02	1.55424	0.358239
chr1	187080367	187080428	SAFB2_K562_rep02	1.55424	0.358239
chr1	187089242	187089285	SAFB2_K562_rep02	1.55424	0.358239
chr1	187096012	187096033	SAFB2_K562_rep02	1.55424	0.358239
chr1	187109979	187110032	SAFB2_K562_rep02	1.55424	0.358239
chr1	187144129	187144186	SAFB2_K562_rep02	1.55424	0.358239
chr1	187150587	187150628	SAFB2_K562_rep02	1.55424	0.358239
chr1	187151988	187152029	SAFB2_K562_rep02	1.55424	0.358239
chr1	187156218	187156261	SAFB2_K562_rep02	1.55424	0.358239
chr1	187174510	187174544	SAFB2_K562_rep02	1.55424	0.358239
chr1	187207127	187207174	SAFB2_K562_rep02	1.55424	0.358239
chr1	187236758	187236843	SAFB2_K562_rep02	1.55424	0.358239
chr1	187275982	187276024	SAFB2_K562_rep02	1.55424	0.358239
chr1	187322997	187323042	SAFB2_K562_rep02	1.55424	0.358239
chr1	187441883	187441940	SAFB2_K562_rep02	1.55424	0.358239
chr1	187064349	187064403	HNRNPL_K562_rep02	1.49218	0.354045
chr1	187066152	187066194	HNRNPL_K562_rep02	1.49218	0.354045
chr1	187071563	187071592	HNRNPL_K562_rep02	1.49218	0.354045
chr1	187107859	187107888	HNRNPL_K562_rep02	1.49218	0.354045
chr1	187107948	187107982	HNRNPL_K562_rep02	1.49218	0.354045
chr1	187134362	187134417	HNRNPL_K562_rep02	1.49218	0.354045
chr1	187142601	187142640	HNRNPL_K562_rep02	1.49218	0.354045
chr1	187211186	187211227	HNRNPL_K562_rep02	1.49218	0.354045
chr1	187219835	187219892	HNRNPL_K562_rep02	1.49218	0.354045
chr1	187236034	187236041	HNRNPL_K562_rep02	1.49218	0.354045
chr1	187237592	187237630	HNRNPL_K562_rep02	1.49218	0.354045
chr1	187246867	187246929	HNRNPL_K562_rep02	1.49218	0.354045
chr1	187266930	187266973	HNRNPL_K562_rep02	1.49218	0.354045
chr1	187285750	187285805	HNRNPL_K562_rep02	1.49218	0.354045
chr1	187066007	187066041	KHDRBS1_K562_rep01	1.48657	0.353606
chr1	187097781	187097825	KHDRBS1_K562_rep01	1.48657	0.353606
chr1	187103878	187103918	KHDRBS1_K562_rep01	1.48657	0.353606
chr1	187132433	187132490	KHDRBS1_K562_rep01	1.48657	0.353606
chr1	187150495	187150522	KHDRBS1_K562_rep01	1.48657	0.353606
chr1	187150970	187151002	KHDRBS1_K562_rep01	1.48657	0.353606
chr1	187152163	187152179	KHDRBS1_K562_rep01	1.48657	0.353606
chr1	187155741	187155803	KHDRBS1_K562_rep01	1.48657	0.353606
chr1	187208893	187208927	KHDRBS1_K562_rep01	1.48657	0.353606
chr1	187208967	187209001	KHDRBS1_K562_rep01	1.48657	0.353606
chr1	187224291	187224346	KHDRBS1_K562_rep01	1.48657	0.353606
chr1	187250612	187250668	KHDRBS1_K562_rep01	1.48657	0.353606
chr1	187304653	187304693	KHDRBS1_K562_rep01	1.48657	0.353606
chr1	187319815	187319877	KHDRBS1_K562_rep01	1.48657	0.353606
chr1	187324345	187324382	KHDRBS1_K562_rep01	1.48657	0.353606
chr1	187116286	187116334	MATR3_K562_rep01	1.03204	0.348659
chr1	187194220	187194261	MATR3_K562_rep01	1.03204	0.348659
chr1	187078573	187078647	SAFB_K562_rep02	1.63225	0.348027
chr1	187099898	187099940	SAFB_K562_rep02	1.63225	0.348027
chr1	187208048	187208119	SAFB_K562_rep02	1.63225	0.348027
chr1	187234953	187235055	SAFB_K562_rep02	1.63225	0.348027
chr1	187096642	187096672	SAFB2_K562_rep01	1.6062	0.347764
chr1	187098070	187098082	SAFB2_K562_rep01	1.6062	0.347764
chr1	187143485	187143573	SAFB2_K562_rep01	1.6062	0.347764
chr1	187174748	187174791	SAFB2_K562_rep01	1.6062	0.347764
chr1	187206230	187206276	SAFB2_K562_rep01	1.6062	0.347764
chr1	187236402	187236485	SAFB2_K562_rep01	1.6062	0.347764
chr1	187432349	187432397	SAFB2_K562_rep01	1.6062	0.347764
chr1	187073564	187073609	KHDRBS1_K562_rep01	1.70896	0.347329
chr1	187081207	187081293	KHDRBS1_K562_rep01	1.70896	0.347329
chr1	187089400	187089441	KHDRBS1_K562_rep01	1.70896	0.347329
chr1	187089658	187089699	KHDRBS1_K562_rep01	1.70896	0.347329
chr1	187092176	187092251	KHDRBS1_K562_rep01	1.70896	0.347329
chr1	187105023	187105064	KHDRBS1_K562_rep01	1.70896	0.347329
chr1	187105614	187105641	KHDRBS1_K562_rep01	1.70896	0.347329
chr1	187128017	187128045	KHDRBS1_K562_rep01	1.70896	0.347329
chr1	187203905	187203967	KHDRBS1_K562_rep01	1.70896	0.347329
chr1	187208805	187208848	KHDRBS1_K562_rep01	1.70896	0.347329
chr1	187247716	187247807	KHDRBS1_K562_rep01	1.70896	0.347329
chr1	187322659	187322701	KHDRBS1_K562_rep01	1.70896	0.347329
chr1	187324183	187324229	KHDRBS1_K562_rep01	1.70896	0.347329
chr1	187073293	187073372	HNRNPL_K562_rep02	1.71457	0.347191
chr1	187078948	187079018	HNRNPL_K562_rep02	1.71457	0.347191
chr1	187096785	187096852	HNRNPL_K562_rep02	1.71457	0.347191
chr1	187114206	187114252	HNRNPL_K562_rep02	1.71457	0.347191
chr1	187143036	187143075	HNRNPL_K562_rep02	1.71457	0.347191
chr1	187147681	187147750	HNRNPL_K562_rep02	1.71457	0.347191
chr1	187170998	187171069	HNRNPL_K562_rep02	1.71457	0.347191
chr1	187219146	187219213	HNRNPL_K562_rep02	1.71457	0.347191
chr1	187239002	187239060	HNRNPL_K562_rep02	1.71457	0.347191
chr1	187245747	187245836	HNRNPL_K562_rep02	1.71457	0.347191
chr1	187062421	187062466	UCHL5_K562_rep02	1.0206	0.346943
chr1	187081212	187081278	KHDRBS1_K562_rep02	1.53437	0.345756
chr1	187085796	187085822	KHDRBS1_K562_rep02	1.53437	0.345756
chr1	187112834	187112877	KHDRBS1_K562_rep02	1.53437	0.345756
chr1	187128079	187128105	KHDRBS1_K562_rep02	1.53437	0.345756
chr1	187150491	187150543	KHDRBS1_K562_rep02	1.53437	0.345756
chr1	187151336	187151357	KHDRBS1_K562_rep02	1.53437	0.345756
chr1	187196106	187196175	KHDRBS1_K562_rep02	1.53437	0.345756
chr1	187220587	187220640	KHDRBS1_K562_rep02	1.53437	0.345756
chr1	187082088	187082131	RBFOX2_K562_rep02	1.24769	0.342744
chr1	187101011	187101098	PPIL4_K562_rep01	1.45727	0.341594
chr1	187236019	187236054	HNRNPL_HepG2_rep02	1.17507	0.339745
chr1	187098479	187098552	PPIL4_K562_rep01	1.64991	0.337012
chr1	187086894	187086925	KHDRBS1_K562_rep02	1.72701	0.3343
chr1	187095750	187095855	KHDRBS1_K562_rep02	1.72701	0.3343
chr1	187158405	187158483	KHDRBS1_K562_rep02	1.72701	0.3343
chr1	187164873	187164924	KHDRBS1_K562_rep02	1.72701	0.3343
chr1	187166867	187166947	KHDRBS1_K562_rep02	1.72701	0.3343
chr1	187073118	187073180	HNRNPU_K562_rep01	1.42439	0.326389
chr1	187154590	187154701	HNRNPC_K562_rep01	1.40573	0.325412
chr1	187076430	187076495	MATR3_K562_rep02	1.21713	0.319512
chr1	187107744	187107802	ILF3_K562_rep01	1.03106	0.312956
chr1	187097570	187097612	RBFOX2_K562_rep01	1.05511	0.292015
chr1	187122705	187122818	KHSRP_K562_rep01	1.04929	0.291912
chr1	187198598	187198706	KHSRP_K562_rep01	1.04929	0.291912
chr1	187296696	187296810	KHSRP_K562_rep01	1.04929	0.291912
chr1	187144628	187144708	KHSRP_K562_rep02	0.998989	0.290463
chr1	187161150	187161197	KHSRP_K562_rep02	0.998989	0.290463
chr1	187150580	187150615	KHDRBS1_K562_rep01	0.901608	0.284934
chr1	187101519	187101560	KHDRBS1_K562_rep01	1.07153	0.283921
chr1	187102965	187103060	HNRNPL_K562_rep02	1.07714	0.283885
chr1	187062374	187062455	KHDRBS1_K562_rep02	0.896936	0.278736
chr1	187091213	187091268	KHDRBS1_K562_rep02	0.896936	0.278736
chr1	187132353	187132434	KHDRBS1_K562_rep02	1.04894	0.277357
chr1	187216936	187217005	KHDRBS1_K562_rep02	1.04894	0.277357
chr1	187085797	187085841	SAFB2_K562_rep01	1.12077	0.275699
chr1	187099240	187099269	SAFB2_K562_rep01	1.12077	0.275699
chr1	187326637	187326745	SAFB2_K562_rep01	1.12077	0.275699
chr1	187154142	187154218	RBFOX2_K562_rep02	0.733122	0.259386
chr1	187146315	187146422	SAFB2_K562_rep02	0.843744	0.244019
chr1	187099886	187099919	TAF15_K562_rep02	1.57597	0.204115
chr1	187107196	187107221	TAF15_K562_rep02	1.57597	0.204115
chr1	187117163	187117196	TAF15_K562_rep02	1.57597	0.204115
chr1	187173988	187174012	TAF15_K562_rep02	1.57597	0.204115
chr1	187197122	187197150	TAF15_K562_rep02	1.57597	0.204115
chr1	187233327	187233357	TAF15_K562_rep02	1.57597	0.204115
chr1	187236810	187236830	TAF15_K562_rep02	1.57597	0.204115
chr1	187444966	187444991	TAF15_K562_rep02	1.57597	0.204115
chr1	187445187	187445215	TAF15_K562_rep02	1.57597	0.204115
chr1	187082185	187082206	RBFOX2_K562_rep02	1.51073	0.203775
chr1	187125571	187125608	RBFOX2_K562_rep02	1.51073	0.203775
chr1	187138900	187138927	RBFOX2_K562_rep02	1.51073	0.203775
chr1	187178874	187178901	RBFOX2_K562_rep02	1.51073	0.203775
chr1	187231210	187231243	RBFOX2_K562_rep02	1.51073	0.203775
chr1	187436072	187436105	RBFOX2_K562_rep02	1.51073	0.203775
chr1	187099892	187099930	SRSF1_K562_rep01	1.50954	0.203764
chr1	187099992	187100016	NOLC1_K562_rep01	1.49439	0.203607
chr1	187104240	187104281	NOLC1_K562_rep01	1.49439	0.203607
chr1	187152114	187152146	NOLC1_K562_rep01	1.49439	0.203607
chr1	187320580	187320589	NOLC1_K562_rep01	1.49439	0.203607
chr1	187079277	187079299	AGGF1_K562_rep02	1.49235	0.203584
chr1	187082116	187082133	AGGF1_K562_rep02	1.49235	0.203584
chr1	187084744	187084774	AGGF1_K562_rep02	1.49235	0.203584
chr1	187099544	187099567	AGGF1_K562_rep02	1.49235	0.203584
chr1	187102974	187103002	AGGF1_K562_rep02	1.49235	0.203584
chr1	187106478	187106508	AGGF1_K562_rep02	1.49235	0.203584
chr1	187234793	187234806	AGGF1_K562_rep02	1.49235	0.203584
chr1	187278452	187278481	AGGF1_K562_rep02	1.49235	0.203584
chr1	187308221	187308247	AGGF1_K562_rep02	1.49235	0.203584
chr1	187112721	187112746	CSTF2T_K562_rep01	1.42755	0.202577
chr1	187071873	187071896	HNRNPUL1_K562_rep01	1.35915	0.200962
chr1	187227079	187227114	HNRNPUL1_K562_rep01	1.35915	0.200962
chr1	187132043	187132066	TARDBP_K562_rep01	1.34017	0.200416
chr1	187149471	187149500	TARDBP_K562_rep01	1.34017	0.200416
chr1	187277817	187277849	TARDBP_K562_rep01	1.34017	0.200416
chr1	187086982	187087014	APOBEC3C_K562_rep02	1.33398	0.200229
chr1	187135468	187135475	ZC3H8_K562_rep02	1.32495	0.199948
chr1	187135475	187135496	ZC3H8_K562_rep02	1.32495	0.199948
chr1	187197445	187197474	ZC3H8_K562_rep02	1.32495	0.199948
chr1	187114611	187114636	NONO_K562_rep02	1.29307	0.198882
chr1	187070233	187070261	ILF3_K562_rep02	1.29066	0.198796
chr1	187073969	187074011	ILF3_K562_rep02	1.29066	0.198796
chr1	187077559	187077588	ILF3_K562_rep02	1.29066	0.198796
chr1	187095378	187095415	ILF3_K562_rep02	1.29066	0.198796
chr1	187107728	187107767	ILF3_K562_rep02	1.29066	0.198796
chr1	187149938	187149955	ILF3_K562_rep02	1.29066	0.198796
chr1	187150590	187150626	ILF3_K562_rep02	1.29066	0.198796
chr1	187156958	187156992	ILF3_K562_rep02	1.29066	0.198796
chr1	187168725	187168758	ILF3_K562_rep02	1.29066	0.198796
chr1	187178759	187178793	ILF3_K562_rep02	1.29066	0.198796
chr1	187237163	187237193	ILF3_K562_rep02	1.29066	0.198796
chr1	187441311	187441324	ILF3_K562_rep02	1.29066	0.198796
chr1	187108248	187108279	HNRNPM_K562_rep01	1.26389	0.197805
chr1	187120496	187120530	HNRNPM_K562_rep01	1.26389	0.197805
chr1	187124617	187124630	HNRNPM_K562_rep01	1.26389	0.197805
chr1	187125113	187125129	HNRNPM_K562_rep01	1.26389	0.197805
chr1	187126792	187126830	HNRNPM_K562_rep01	1.26389	0.197805
chr1	187139762	187139793	HNRNPM_K562_rep01	1.26389	0.197805
chr1	187140772	187140805	HNRNPM_K562_rep01	1.26389	0.197805
chr1	187191247	187191278	HNRNPM_K562_rep01	1.26389	0.197805
chr1	187230977	187231001	HNRNPM_K562_rep01	1.26389	0.197805
chr1	187244154	187244188	HNRNPM_K562_rep01	1.26389	0.197805
chr1	187434209	187434246	HNRNPM_K562_rep01	1.26389	0.197805
chr1	187121653	187121684	HNRNPM_K562_rep01	1.26389	0.197805
chr1	187062530	187062554	HNRNPM_K562_rep02	1.25805	0.197579
chr1	187068322	187068357	HNRNPM_K562_rep02	1.25805	0.197579
chr1	187129983	187130007	HNRNPM_K562_rep02	1.25805	0.197579
chr1	187190171	187190214	HNRNPM_K562_rep02	1.25805	0.197579
chr1	187167419	187167452	IGF2BP1_K562_rep02	1.23505	0.19665
chr1	187277830	187277850	IGF2BP1_K562_rep02	1.23505	0.19665
chr1	187116274	187116322	MATR3_K562_rep02	1.21713	0.195887
chr1	187118206	187118239	MATR3_K562_rep02	1.21713	0.195887
chr1	187118895	187118927	MATR3_K562_rep02	1.21713	0.195887
chr1	187119527	187119559	MATR3_K562_rep02	1.21713	0.195887
chr1	187123494	187123526	MATR3_K562_rep02	1.21713	0.195887
chr1	187124802	187124810	MATR3_K562_rep02	1.21713	0.195887
chr1	187125305	187125321	MATR3_K562_rep02	1.21713	0.195887
chr1	187126208	187126212	MATR3_K562_rep02	1.21713	0.195887
chr1	187130182	187130211	MATR3_K562_rep02	1.21713	0.195887
chr1	187135394	187135429	MATR3_K562_rep02	1.21713	0.195887
chr1	187139638	187139668	MATR3_K562_rep02	1.21713	0.195887
chr1	187140694	187140724	MATR3_K562_rep02	1.21713	0.195887
chr1	187168169	187168188	MATR3_K562_rep02	1.21713	0.195887
chr1	187174255	187174292	MATR3_K562_rep02	1.21713	0.195887
chr1	187181110	187181149	MATR3_K562_rep02	1.21713	0.195887
chr1	187182456	187182492	MATR3_K562_rep02	1.21713	0.195887
chr1	187191562	187191576	MATR3_K562_rep02	1.21713	0.195887
chr1	187191688	187191727	MATR3_K562_rep02	1.21713	0.195887
chr1	187209609	187209633	MATR3_K562_rep02	1.21713	0.195887
chr1	187216198	187216228	MATR3_K562_rep02	1.21713	0.195887
chr1	187239392	187239424	MATR3_K562_rep02	1.21713	0.195887
chr1	187256473	187256509	MATR3_K562_rep02	1.21713	0.195887
chr1	187065926	187065949	TIA1_K562_rep01	1.20068	0.195158
chr1	187075704	187075731	TIA1_K562_rep01	1.20068	0.195158
chr1	187085999	187086030	TIA1_K562_rep01	1.20068	0.195158
chr1	187088011	187088031	TIA1_K562_rep01	1.20068	0.195158
chr1	187125730	187125764	TIA1_K562_rep01	1.20068	0.195158
chr1	187155760	187155770	TIA1_K562_rep01	1.20068	0.195158
chr1	187164565	187164598	TIA1_K562_rep01	1.20068	0.195158
chr1	187165081	187165102	TIA1_K562_rep01	1.20068	0.195158
chr1	187189915	187189951	TIA1_K562_rep01	1.20068	0.195158
chr1	187195323	187195347	TIA1_K562_rep01	1.20068	0.195158
chr1	187197841	187197867	TIA1_K562_rep01	1.20068	0.195158
chr1	187074180	187074216	HNRNPK_K562_rep02	1.06484	0.188109
chr1	187076218	187076248	HNRNPK_K562_rep02	1.06484	0.188109
chr1	187115998	187116029	HNRNPK_K562_rep02	1.06484	0.188109
chr1	187124158	187124184	HNRNPK_K562_rep02	1.06484	0.188109
chr1	187147667	187147704	HNRNPK_K562_rep02	1.06484	0.188109
chr1	187238156	187238187	HNRNPK_K562_rep02	1.06484	0.188109
chr1	187076342	187076383	ILF3_K562_rep01	1.03106	0.186094
chr1	187083765	187083790	ILF3_K562_rep01	1.03106	0.186094
chr1	187086902	187086931	ILF3_K562_rep01	1.03106	0.186094
chr1	187087072	187087097	ILF3_K562_rep01	1.03106	0.186094
chr1	187088247	187088268	ILF3_K562_rep01	1.03106	0.186094
chr1	187133544	187133580	ILF3_K562_rep01	1.03106	0.186094
chr1	187150519	187150525	ILF3_K562_rep01	1.03106	0.186094
chr1	187154270	187154299	ILF3_K562_rep01	1.03106	0.186094
chr1	187166569	187166605	ILF3_K562_rep01	1.03106	0.186094
chr1	187170030	187170067	ILF3_K562_rep01	1.03106	0.186094
chr1	187171267	187171294	ILF3_K562_rep01	1.03106	0.186094
chr1	187174120	187174152	ILF3_K562_rep01	1.03106	0.186094
chr1	187174476	187174512	ILF3_K562_rep01	1.03106	0.186094
chr1	187176436	187176482	ILF3_K562_rep01	1.03106	0.186094
chr1	187263589	187263625	ILF3_K562_rep01	1.03106	0.186094
chr1	187263831	187263873	ILF3_K562_rep01	1.03106	0.186094
chr1	187275814	187275850	ILF3_K562_rep01	1.03106	0.186094
chr1	187078592	187078634	TIA1_K562_rep02	1.40967	0.184155
chr1	187179419	187179454	TIA1_K562_rep02	1.40967	0.184155
chr1	187062780	187062824	NONO_K562_rep01	1.4039	0.184149
chr1	187129306	187129343	NONO_K562_rep01	1.4039	0.184149
chr1	187168741	187168772	NONO_K562_rep01	1.4039	0.184149
chr1	187231201	187231234	NONO_K562_rep01	1.4039	0.184149
chr1	187104767	187104814	RBM15_K562_rep02	1.38517	0.184098
chr1	187091804	187091848	ILF3_K562_rep01	1.4461	0.184093
chr1	187125722	187125766	ILF3_K562_rep01	1.4461	0.184093
chr1	187145032	187145060	ILF3_K562_rep01	1.4461	0.184093
chr1	187145459	187145503	ILF3_K562_rep01	1.4461	0.184093
chr1	187150699	187150732	ILF3_K562_rep01	1.4461	0.184093
chr1	187151615	187151661	ILF3_K562_rep01	1.4461	0.184093
chr1	187168891	187168932	ILF3_K562_rep01	1.4461	0.184093
chr1	187169511	187169532	ILF3_K562_rep01	1.4461	0.184093
chr1	187170470	187170514	ILF3_K562_rep01	1.4461	0.184093
chr1	187146737	187146775	HNRNPK_K562_rep02	1.47988	0.183878
chr1	187236206	187236241	TARDBP_K562_rep02	1.30976	0.18343
chr1	187412759	187412800	GRWD1_K562_rep01	1.29373	0.183193
chr1	187298121	187298156	ZNF622_K562_rep02	1.00841	0.18243
chr1	187077034	187077075	NOLC1_K562_rep02	1.20122	0.181196
chr1	187102097	187102136	NOLC1_K562_rep02	1.20122	0.181196
chr1	187100029	187100066	SLTM_K562_rep02	0.953111	0.181053
chr1	187100176	187100207	SLTM_K562_rep02	0.953111	0.181053
chr1	187086707	187086746	HNRNPL_K562_rep01	1.1917	0.180931
chr1	187088296	187088335	HNRNPL_K562_rep01	1.1917	0.180931
chr1	187134239	187134277	HNRNPL_K562_rep01	1.1917	0.180931
chr1	187142610	187142652	HNRNPL_K562_rep01	1.1917	0.180931
chr1	187142720	187142756	HNRNPL_K562_rep01	1.1917	0.180931
chr1	187205744	187205780	HNRNPL_K562_rep01	1.1917	0.180931
chr1	187219145	187219184	HNRNPL_K562_rep01	1.1917	0.180931
chr1	187262845	187262882	HNRNPL_K562_rep01	1.1917	0.180931
chr1	187266938	187266973	HNRNPL_K562_rep01	1.1917	0.180931
chr1	187310725	187310764	HNRNPL_K562_rep01	1.1917	0.180931
chr1	187198715	187198747	CSTF2T_K562_rep02	1.18871	0.180845
chr1	187103783	187103817	AKAP8L_K562_rep01	0.889158	0.178976
chr1	187106656	187106693	AKAP8L_K562_rep01	0.889158	0.178976
chr1	187236070	187236100	AKAP8L_K562_rep01	0.889158	0.178976
chr1	187209758	187209794	SND1_K562_rep02	0.880355	0.17865
chr1	187263622	187263656	XRN2_K562_rep01	0.870259	0.178265
chr1	187257999	187258030	MTPAP_K562_rep02	0.867791	0.178169
chr1	187075803	187075844	RBFOX2_K562_rep01	1.05511	0.175982
chr1	187097215	187097253	RBFOX2_K562_rep01	1.05511	0.175982
chr1	187102758	187102808	RBFOX2_K562_rep01	1.05511	0.175982
chr1	187139758	187139792	RBFOX2_K562_rep01	1.05511	0.175982
chr1	187160389	187160432	RBFOX2_K562_rep01	1.05511	0.175982
chr1	187177859	187177899	RBFOX2_K562_rep01	1.05511	0.175982
chr1	187436068	187436105	RBFOX2_K562_rep01	1.05511	0.175982
chr1	187443506	187443545	RBFOX2_K562_rep01	1.05511	0.175982
chr1	187062398	187062426	KHSRP_K562_rep01	1.04929	0.175726
chr1	187079759	187079803	KHSRP_K562_rep01	1.04929	0.175726
chr1	187120733	187120758	KHSRP_K562_rep01	1.04929	0.175726
chr1	187125957	187126004	KHSRP_K562_rep01	1.04929	0.175726
chr1	187128220	187128259	KHSRP_K562_rep01	1.04929	0.175726
chr1	187149370	187149415	KHSRP_K562_rep01	1.04929	0.175726
chr1	187161044	187161074	KHSRP_K562_rep01	1.04929	0.175726
chr1	187162253	187162293	KHSRP_K562_rep01	1.04929	0.175726
chr1	187168411	187168461	KHSRP_K562_rep01	1.04929	0.175726
chr1	187215215	187215253	KHSRP_K562_rep01	1.04929	0.175726
chr1	187224547	187224598	KHSRP_K562_rep01	1.04929	0.175726
chr1	187231109	187231155	KHSRP_K562_rep01	1.04929	0.175726
chr1	187299948	187299994	KHSRP_K562_rep01	1.04929	0.175726
chr1	187329121	187329148	KHSRP_K562_rep01	1.04929	0.175726
chr1	187412899	187412938	KHSRP_K562_rep01	1.04929	0.175726
chr1	187445837	187445881	KHSRP_K562_rep01	1.04929	0.175726
chr1	187103819	187103850	PPIL4_K562_rep02	1.04023	0.17532
chr1	187065696	187065765	KHSRP_K562_rep02	1.32092	0.173419
chr1	187128203	187128258	KHSRP_K562_rep02	1.32092	0.173419
chr1	187138854	187138906	KHSRP_K562_rep02	1.32092	0.173419
chr1	187139458	187139496	KHSRP_K562_rep02	1.32092	0.173419
chr1	187140356	187140391	KHSRP_K562_rep02	1.32092	0.173419
chr1	187162256	187162293	KHSRP_K562_rep02	1.32092	0.173419
chr1	187195973	187196022	KHSRP_K562_rep02	1.32092	0.173419
chr1	187267940	187267987	KHSRP_K562_rep02	1.32092	0.173419
chr1	187279038	187279095	KHSRP_K562_rep02	1.32092	0.173419
chr1	187298320	187298349	KHSRP_K562_rep02	1.32092	0.173419
chr1	187145946	187145973	SND1_K562_rep01	0.762112	0.173389
chr1	187074757	187074817	SAFB2_K562_rep02	1.2912	0.173354
chr1	187084028	187084041	SAFB2_K562_rep02	1.2912	0.173354
chr1	187091471	187091525	SAFB2_K562_rep02	1.2912	0.173354
chr1	187097785	187097802	SAFB2_K562_rep02	1.2912	0.173354
chr1	187113891	187113912	SAFB2_K562_rep02	1.2912	0.173354
chr1	187135928	187135979	SAFB2_K562_rep02	1.2912	0.173354
chr1	187152581	187152613	SAFB2_K562_rep02	1.2912	0.173354
chr1	187161593	187161646	SAFB2_K562_rep02	1.2912	0.173354
chr1	187206233	187206288	SAFB2_K562_rep02	1.2912	0.173354
chr1	187207556	187207592	SAFB2_K562_rep02	1.2912	0.173354
chr1	187208386	187208406	SAFB2_K562_rep02	1.2912	0.173354
chr1	187209318	187209357	SAFB2_K562_rep02	1.2912	0.173354
chr1	187219133	187219182	SAFB2_K562_rep02	1.2912	0.173354
chr1	187230623	187230669	SAFB2_K562_rep02	1.2912	0.173354
chr1	187277537	187277581	SAFB2_K562_rep02	1.2912	0.173354
chr1	187441343	187441366	SAFB2_K562_rep02	1.2912	0.173354
chr1	187125725	187125769	KHSRP_K562_rep01	1.37122	0.173252
chr1	187140036	187140083	KHSRP_K562_rep01	1.37122	0.173252
chr1	187190170	187190216	KHSRP_K562_rep01	1.37122	0.173252
chr1	187299383	187299438	KHSRP_K562_rep01	1.37122	0.173252
chr1	187328983	187329020	KHSRP_K562_rep01	1.37122	0.173252
chr1	187099806	187099823	RBFOX2_K562_rep01	1.37704	0.173211
chr1	187101354	187101404	RBFOX2_K562_rep01	1.37704	0.173211
chr1	187102118	187102140	RBFOX2_K562_rep01	1.37704	0.173211
chr1	187106656	187106696	RBFOX2_K562_rep01	1.37704	0.173211
chr1	187151406	187151465	RBFOX2_K562_rep01	1.37704	0.173211
chr1	187069682	187069726	HNRNPL_K562_rep02	1.22914	0.172836
chr1	187093438	187093484	HNRNPL_K562_rep02	1.22914	0.172836
chr1	187101597	187101643	HNRNPL_K562_rep02	1.22914	0.172836
chr1	187146526	187146568	HNRNPL_K562_rep02	1.22914	0.172836
chr1	187167245	187167287	HNRNPL_K562_rep02	1.22914	0.172836
chr1	187177975	187178021	HNRNPL_K562_rep02	1.22914	0.172836
chr1	187178021	187178063	HNRNPL_K562_rep02	1.22914	0.172836
chr1	187180211	187180260	HNRNPL_K562_rep02	1.22914	0.172836
chr1	187207020	187207069	HNRNPL_K562_rep02	1.22914	0.172836
chr1	187250437	187250476	HNRNPL_K562_rep02	1.22914	0.172836
chr1	187310807	187310844	HNRNPL_K562_rep02	1.22914	0.172836
chr1	187070267	187070296	KHDRBS1_K562_rep01	1.22354	0.172764
chr1	187072255	187072309	KHDRBS1_K562_rep01	1.22354	0.172764
chr1	187080354	187080394	KHDRBS1_K562_rep01	1.22354	0.172764
chr1	187086056	187086112	KHDRBS1_K562_rep01	1.22354	0.172764
chr1	187089590	187089623	KHDRBS1_K562_rep01	1.22354	0.172764
chr1	187101928	187101951	KHDRBS1_K562_rep01	1.22354	0.172764
chr1	187105287	187105317	KHDRBS1_K562_rep01	1.22354	0.172764
chr1	187151083	187151094	KHDRBS1_K562_rep01	1.22354	0.172764
chr1	187170005	187170064	KHDRBS1_K562_rep01	1.22354	0.172764
chr1	187174462	187174507	KHDRBS1_K562_rep01	1.22354	0.172764
chr1	187174676	187174702	KHDRBS1_K562_rep01	1.22354	0.172764
chr1	187202060	187202108	KHDRBS1_K562_rep01	1.22354	0.172764
chr1	187220593	187220640	KHDRBS1_K562_rep01	1.22354	0.172764
chr1	187221449	187221491	KHDRBS1_K562_rep01	1.22354	0.172764
chr1	187282037	187282079	KHDRBS1_K562_rep01	1.22354	0.172764
chr1	187286292	187286339	KHDRBS1_K562_rep01	1.22354	0.172764
chr1	187304877	187304903	KHDRBS1_K562_rep01	1.22354	0.172764
chr1	187306460	187306488	KHDRBS1_K562_rep01	1.22354	0.172764
chr1	187322981	187323015	KHDRBS1_K562_rep01	1.22354	0.172764
chr1	187325859	187325890	KHDRBS1_K562_rep01	1.22354	0.172764
chr1	187326020	187326044	KHDRBS1_K562_rep01	1.22354	0.172764
chr1	187080841	187080888	SAFB_K562_rep02	1.14682	0.171369
chr1	187083060	187083090	SAFB_K562_rep02	1.14682	0.171369
chr1	187096823	187096861	SAFB_K562_rep02	1.14682	0.171369
chr1	187101755	187101800	SAFB_K562_rep02	1.14682	0.171369
chr1	187149027	187149077	SAFB_K562_rep02	1.14682	0.171369
chr1	187172462	187172508	SAFB_K562_rep02	1.14682	0.171369
chr1	187240026	187240092	SAFB_K562_rep02	1.14682	0.171369
chr1	187429421	187429484	SAFB_K562_rep02	1.14682	0.171369
chr1	187429776	187429835	SAFB_K562_rep02	1.14682	0.171369
chr1	187445804	187445864	SAFB_K562_rep02	1.14682	0.171369
chr1	187081018	187081071	SAFB_K562_rep01	1.13712	0.171139
chr1	187086923	187086982	SAFB_K562_rep01	1.13712	0.171139
chr1	187097541	187097600	SAFB_K562_rep01	1.13712	0.171139
chr1	187104091	187104153	SAFB_K562_rep01	1.13712	0.171139
chr1	187231002	187231058	SAFB_K562_rep01	1.13712	0.171139
chr1	187063191	187063237	SAFB2_K562_rep01	1.12077	0.170726
chr1	187081248	187081307	SAFB2_K562_rep01	1.12077	0.170726
chr1	187082175	187082241	SAFB2_K562_rep01	1.12077	0.170726
chr1	187093239	187093263	SAFB2_K562_rep01	1.12077	0.170726
chr1	187093572	187093607	SAFB2_K562_rep01	1.12077	0.170726
chr1	187107711	187107766	SAFB2_K562_rep01	1.12077	0.170726
chr1	187149232	187149271	SAFB2_K562_rep01	1.12077	0.170726
chr1	187152877	187152912	SAFB2_K562_rep01	1.12077	0.170726
chr1	187153278	187153321	SAFB2_K562_rep01	1.12077	0.170726
chr1	187176421	187176465	SAFB2_K562_rep01	1.12077	0.170726
chr1	187181112	187181163	SAFB2_K562_rep01	1.12077	0.170726
chr1	187207831	187207871	SAFB2_K562_rep01	1.12077	0.170726
chr1	187210200	187210251	SAFB2_K562_rep01	1.12077	0.170726
chr1	187230730	187230781	SAFB2_K562_rep01	1.12077	0.170726
chr1	187239270	187239324	SAFB2_K562_rep01	1.12077	0.170726
chr1	187308701	187308753	SAFB2_K562_rep01	1.12077	0.170726
chr1	187325283	187325335	SAFB2_K562_rep01	1.12077	0.170726
chr1	187420376	187420432	SAFB2_K562_rep01	1.12077	0.170726
chr1	187431013	187431073	SAFB2_K562_rep01	1.12077	0.170726
chr1	187432929	187432983	SAFB2_K562_rep01	1.12077	0.170726
chr1	187123798	187123849	HNRNPA1_K562_rep01	1.06322	0.169013
chr1	187137392	187137446	HNRNPA1_K562_rep01	1.06322	0.169013
chr1	187069726	187069760	KHDRBS1_K562_rep02	1.04894	0.168528
chr1	187072152	187072186	KHDRBS1_K562_rep02	1.04894	0.168528
chr1	187078856	187078897	KHDRBS1_K562_rep02	1.04894	0.168528
chr1	187085022	187085052	KHDRBS1_K562_rep02	1.04894	0.168528
chr1	187086375	187086394	KHDRBS1_K562_rep02	1.04894	0.168528
chr1	187089605	187089633	KHDRBS1_K562_rep02	1.04894	0.168528
chr1	187101029	187101051	KHDRBS1_K562_rep02	1.04894	0.168528
chr1	187104794	187104835	KHDRBS1_K562_rep02	1.04894	0.168528
chr1	187105526	187105567	KHDRBS1_K562_rep02	1.04894	0.168528
chr1	187105727	187105759	KHDRBS1_K562_rep02	1.04894	0.168528
chr1	187131211	187131249	KHDRBS1_K562_rep02	1.04894	0.168528
chr1	187143191	187143226	KHDRBS1_K562_rep02	1.04894	0.168528
chr1	187147110	187147162	KHDRBS1_K562_rep02	1.04894	0.168528
chr1	187183255	187183302	KHDRBS1_K562_rep02	1.04894	0.168528
chr1	187185623	187185670	KHDRBS1_K562_rep02	1.04894	0.168528
chr1	187203401	187203449	KHDRBS1_K562_rep02	1.04894	0.168528
chr1	187204493	187204531	KHDRBS1_K562_rep02	1.04894	0.168528
chr1	187237020	187237069	KHDRBS1_K562_rep02	1.04894	0.168528
chr1	187238867	187238912	KHDRBS1_K562_rep02	1.04894	0.168528
chr1	187239255	187239289	KHDRBS1_K562_rep02	1.04894	0.168528
chr1	187319962	187320016	KHDRBS1_K562_rep02	1.04894	0.168528
chr1	187321097	187321141	KHDRBS1_K562_rep02	1.04894	0.168528
chr1	187321249	187321280	KHDRBS1_K562_rep02	1.04894	0.168528
chr1	187322890	187322931	KHDRBS1_K562_rep02	1.04894	0.168528
chr1	187272974	187272984	AQR_K562_rep01	0.695209	0.16708
chr1	187102275	187102323	PPIL4_K562_rep01	1.23487	0.166635
chr1	187066533	187066571	KHDRBS1_K562_rep02	1.31197	0.166522
chr1	187072861	187072881	KHDRBS1_K562_rep02	1.31197	0.166522
chr1	187073107	187073132	KHDRBS1_K562_rep02	1.31197	0.166522
chr1	187073491	187073508	KHDRBS1_K562_rep02	1.31197	0.166522
chr1	187073879	187073915	KHDRBS1_K562_rep02	1.31197	0.166522
chr1	187074019	187074058	KHDRBS1_K562_rep02	1.31197	0.166522
chr1	187083420	187083463	KHDRBS1_K562_rep02	1.31197	0.166522
chr1	187085433	187085464	KHDRBS1_K562_rep02	1.31197	0.166522
chr1	187086832	187086863	KHDRBS1_K562_rep02	1.31197	0.166522
chr1	187092855	187092910	KHDRBS1_K562_rep02	1.31197	0.166522
chr1	187114012	187114043	KHDRBS1_K562_rep02	1.31197	0.166522
chr1	187133893	187133937	KHDRBS1_K562_rep02	1.31197	0.166522
chr1	187143486	187143522	KHDRBS1_K562_rep02	1.31197	0.166522
chr1	187151259	187151278	KHDRBS1_K562_rep02	1.31197	0.166522
chr1	187155730	187155784	KHDRBS1_K562_rep02	1.31197	0.166522
chr1	187174860	187174899	KHDRBS1_K562_rep02	1.31197	0.166522
chr1	187175376	187175407	KHDRBS1_K562_rep02	1.31197	0.166522
chr1	187183726	187183765	KHDRBS1_K562_rep02	1.31197	0.166522
chr1	187195968	187196024	KHDRBS1_K562_rep02	1.31197	0.166522
chr1	187304657	187304684	KHDRBS1_K562_rep02	1.31197	0.166522
chr1	187324170	187324221	KHDRBS1_K562_rep02	1.31197	0.166522
chr1	187082053	187082111	HNRNPA1_K562_rep01	1.32625	0.16641
chr1	187140686	187140734	HNRNPA1_K562_rep01	1.32625	0.16641
chr1	187213888	187213931	HNRNPA1_K562_rep01	1.32625	0.16641
chr1	187071949	187071995	SAFB2_K562_rep01	1.38381	0.165665
chr1	187087039	187087068	SAFB2_K562_rep01	1.38381	0.165665
chr1	187132504	187132546	SAFB2_K562_rep01	1.38381	0.165665
chr1	187137574	187137615	SAFB2_K562_rep01	1.38381	0.165665
chr1	187158005	187158066	SAFB2_K562_rep01	1.38381	0.165665
chr1	187175750	187175820	SAFB2_K562_rep01	1.38381	0.165665
chr1	187275930	187275977	SAFB2_K562_rep01	1.38381	0.165665
chr1	187320562	187320620	SAFB2_K562_rep01	1.38381	0.165665
chr1	187327366	187327418	SAFB2_K562_rep01	1.38381	0.165665
chr1	187089750	187089804	SAFB_K562_rep01	1.40015	0.165368
chr1	187094113	187094180	SAFB_K562_rep02	1.40986	0.165174
chr1	187096385	187096427	SAFB_K562_rep02	1.40986	0.165174
chr1	187097677	187097722	SAFB_K562_rep02	1.40986	0.165174
chr1	187101043	187101120	SAFB_K562_rep02	1.40986	0.165174
chr1	187101925	187101966	SAFB_K562_rep02	1.40986	0.165174
chr1	187104151	187104193	SAFB_K562_rep02	1.40986	0.165174
chr1	187161160	187161228	SAFB_K562_rep02	1.40986	0.165174
chr1	187276094	187276136	SAFB_K562_rep02	1.40986	0.165174
chr1	187308172	187308249	SAFB_K562_rep02	1.40986	0.165174
chr1	187107109	187107150	UCHL5_K562_rep02	0.605562	0.164119
chr1	187101806	187101822	TAF15_K562_rep01	0.591045	0.163142
chr1	187101933	187101965	TAF15_K562_rep01	0.591045	0.163142
chr1	187262208	187262231	TAF15_K562_rep01	0.591045	0.163142
chr1	187078205	187078237	AGGF1_K562_rep02	0.907392	0.162119
chr1	187151811	187151843	AGGF1_K562_rep02	0.907392	0.162119
chr1	187238355	187238395	AGGF1_K562_rep02	0.907392	0.162119
chr1	187072507	187072539	AGGF1_K562_rep02	0.907392	0.162119
chr1	187141332	187141417	HNRNPU_K562_rep01	1.06182	0.160293
chr1	187163874	187163908	DDX6_K562_rep02	0.556653	0.160222
chr1	187102412	187102497	HNRNPC_K562_rep01	1.04316	0.159864
chr1	187214453	187214499	TARDBP_K562_rep01	0.755208	0.158536
chr1	187135946	187136025	HNRNPU_K562_rep01	1.25446	0.158429
chr1	187116279	187116305	ILF3_K562_rep02	0.705697	0.156714
chr1	187120474	187120520	ILF3_K562_rep02	0.705697	0.156714
chr1	187176834	187176876	ILF3_K562_rep02	0.705697	0.156714
chr1	187103789	187103835	HLTF_K562_rep01	1.07845	0.155543
chr1	187104149	187104205	HLTF_K562_rep01	1.07845	0.155543
chr1	187104761	187104822	HLTF_K562_rep01	1.07845	0.155543
chr1	187062954	187063001	MATR3_K562_rep02	0.632167	0.153458
chr1	187118827	187118862	MATR3_K562_rep02	0.632167	0.153458
chr1	187139918	187139950	TIA1_K562_rep01	0.615721	0.152645
chr1	187080536	187080566	UPF1_K562_rep02	0.425082	0.151759
chr1	187130166	187130201	UPF1_K562_rep02	0.425082	0.151759
chr1	187092872	187092928	HNRNPU_K562_rep02	1.03302	0.151702
chr1	187290429	187290491	HNRNPL_K562_rep01	0.776661	0.143265
chr1	187082088	187082145	RBFOX2_K562_rep01	0.640076	0.140423
chr1	187097766	187097809	RBFOX2_K562_rep01	0.640076	0.140423
chr1	187105316	187105383	RBFOX2_K562_rep01	0.640076	0.140423
chr1	187155746	187155772	KHSRP_K562_rep01	0.63425	0.140243
chr1	187113191	187113236	UCHL5_K562_rep02	0.435637	0.13987
chr1	187176481	187176526	UCHL5_K562_rep02	0.435637	0.13987
chr1	187114798	187114849	KHSRP_K562_rep02	0.806344	0.138543
chr1	187135088	187135126	KHSRP_K562_rep02	0.806344	0.138543
chr1	187093169	187093229	SAFB2_K562_rep02	0.77663	0.138469
chr1	187203939	187204004	SAFB2_K562_rep02	0.77663	0.138469
chr1	187241375	187241426	SAFB2_K562_rep02	0.77663	0.138469
chr1	187444936	187445020	SAFB2_K562_rep02	0.77663	0.138469
chr1	187142155	187142187	HNRNPL_K562_rep02	0.714571	0.137875
chr1	187086968	187087019	KHDRBS1_K562_rep01	0.708963	0.137792
chr1	187097274	187097321	KHDRBS1_K562_rep01	0.708963	0.137792
chr1	187179053	187179133	KHDRBS1_K562_rep01	0.708963	0.137792
chr1	187218878	187218919	KHDRBS1_K562_rep01	0.708963	0.137792
chr1	187441250	187441323	KHDRBS1_K562_rep01	0.708963	0.137792
chr1	187070580	187070650	SAFB2_K562_rep01	0.606201	0.135462
chr1	187092859	187092913	SAFB2_K562_rep01	0.606201	0.135462
chr1	187209370	187209446	SAFB2_K562_rep01	0.798846	0.134758
chr1	187444975	187445040	SAFB2_K562_rep01	0.798846	0.134758
chr1	187083954	187084058	SAFB_K562_rep01	0.81519	0.134681
chr1	187085910	187085940	KHDRBS1_K562_rep02	0.727011	0.134591
chr1	187099746	187099823	KHDRBS1_K562_rep02	0.727011	0.134591
chr1	187102722	187102768	KHDRBS1_K562_rep02	0.727011	0.134591
chr1	187179043	187179133	KHDRBS1_K562_rep02	0.727011	0.134591
chr1	187246375	187246447	KHDRBS1_K562_rep02	0.727011	0.134591
chr1	187173637	187173702	AGGF1_K562_rep02	0.492354	0.121955
chr1	187098516	187098553	SAFB2_K562_rep02	0.554238	0.118217
chr1	187083709	187083784	KHDRBS1_K562_rep01	0.638573	0.115394
chr1	187062024	187062063	SRSF1_K562_rep02	0.81262	0
chr1	187062157	187062184	NONO_K562_rep01	-0.0111413	0
chr1	187062243	187062282	PPIL4_K562_rep01	0.234875	0
chr1	187062272	187062282	HNRNPU_K562_rep02	-0.841451	0
chr1	187062377	187062405	CPSF6_K562_rep01	0.579257	0
chr1	187062401	187062417	TIA1_K562_rep02	0.994635	0
chr1	187062741	187062780	RBFOX2_K562_rep01	0.640076	0
chr1	187062780	187062818	HNRNPU_K562_rep02	-1.68945	0
chr1	187062797	187062823	TIA1_K562_rep01	0.200683	0
chr1	187063208	187063235	U2AF2_K562_rep02	-0.285639	0
chr1	187063305	187063335	HNRNPU_K562_rep02	-1.42641	0
chr1	187063609	187063648	KHDRBS1_K562_rep02	0.727011	0
chr1	187063615	187063646	KHDRBS1_K562_rep01	0.901608	0
chr1	187063640	187063669	HNRNPL_K562_rep02	0.492179	0
chr1	187063714	187063761	HNRNPU_K562_rep02	-1.42641	0
chr1	187063751	187063782	KHDRBS1_K562_rep01	-0.0983923	0
chr1	187063828	187063856	HNRNPU_K562_rep01	-0.160574	0
chr1	187063989	187064014	HNRNPU_K562_rep02	-0.426413	0
chr1	187064182	187064216	HNRNPL_K562_rep02	0.492179	0
chr1	187064184	187064209	KHDRBS1_K562_rep02	0.727011	0
chr1	187064238	187064270	HNRNPL_K562_rep01	0.191699	0
chr1	187064333	187064355	NONO_K562_rep01	0.988859	0
chr1	187064365	187064394	HNRNPL_K562_rep01	0.776661	0
chr1	187064575	187064616	HNRNPU_K562_rep02	-0.104485	0
chr1	187064699	187064739	KHSRP_K562_rep02	0.998989	0
chr1	187064910	187064953	HNRNPU_K562_rep02	0.158549	0
chr1	187064924	187064953	HNRNPL_K562_rep02	-0.507821	0
chr1	187064955	187065002	SAFB2_K562_rep01	0.120774	0
chr1	187065038	187065080	HNRNPU_K562_rep02	0.158549	0
chr1	187065130	187065160	HNRNPU_K562_rep01	-0.160574	0
chr1	187065184	187065220	ILF3_K562_rep01	0.031065	0
chr1	187065217	187065260	KHDRBS1_K562_rep01	0.901608	0
chr1	187065240	187065260	SAFB2_K562_rep02	0.554238	0
chr1	187065356	187065385	KHSRP_K562_rep01	0.63425	0
chr1	187065773	187065812	U2AF2_K562_rep02	0.714361	0
chr1	187065784	187065828	HNRNPU_K562_rep01	0.254464	0
chr1	187065793	187065840	U2AF2_K562_rep01	0.685226	0
chr1	187065907	187065950	KHDRBS1_K562_rep02	0.534366	0
chr1	187065994	187066011	HNRNPU_K562_rep01	-0.160574	0
chr1	187066159	187066203	SAFB2_K562_rep02	-1.03072	0
chr1	187066163	187066192	CSTF2T_K562_rep02	0.77367	0
chr1	187066166	187066201	SND1_K562_rep01	-0.237888	0
chr1	187066174	187066190	HNRNPA1_K562_rep01	0.32625	0
chr1	187066174	187066219	HNRNPU_K562_rep02	0.573587	0
chr1	187066178	187066206	SAFB2_K562_rep01	-1.61619	0
chr1	187066184	187066216	ILF3_K562_rep01	0.031065	0
chr1	187066462	187066493	SAFB2_K562_rep01	0.383809	0
chr1	187066489	187066510	HNRNPU_K562_rep02	-0.426413	0
chr1	187066652	187066682	SAFB2_K562_rep01	0.383809	0
chr1	187066722	187066768	HNRNPU_K562_rep02	-1.10449	0
chr1	187066758	187066766	KHDRBS1_K562_rep01	0.48657	0
chr1	187066866	187066895	KHSRP_K562_rep02	0.583952	0
chr1	187066931	187066970	KHSRP_K562_rep01	0.63425	0
chr1	187066932	187066964	KHSRP_K562_rep02	0.583952	0
chr1	187067095	187067135	KHSRP_K562_rep02	0.583952	0
chr1	187067252	187067280	HLTF_K562_rep01	-0.506517	0
chr1	187067729	187067763	KHSRP_K562_rep02	-0.416048	0
chr1	187068264	187068289	HNRNPA1_K562_rep01	0.32625	0
chr1	187068979	187069012	ILF3_K562_rep01	-0.553898	0
chr1	187069108	187069127	RBFOX2_K562_rep01	0.640076	0
chr1	187069108	187069151	KHDRBS1_K562_rep01	0.901608	0
chr1	187069163	187069192	KHSRP_K562_rep01	0.63425	0
chr1	187069320	187069376	HNRNPU_K562_rep02	0.158549	0
chr1	187069322	187069372	KHDRBS1_K562_rep01	-0.361427	0
chr1	187069347	187069388	KHDRBS1_K562_rep02	-0.0505962	0
chr1	187069359	187069386	SAFB2_K562_rep02	-0.615687	0
chr1	187069424	187069475	HNRNPU_K562_rep02	-0.104485	0
chr1	187069589	187069634	SAFB2_K562_rep01	0.798846	0
chr1	187069697	187069728	RBFOX2_K562_rep01	0.640076	0
chr1	187069845	187069854	KHDRBS1_K562_rep01	0.48657	0
chr1	187069988	187070008	HNRNPL_K562_rep02	0.492179	0
chr1	187070176	187070191	KHDRBS1_K562_rep01	-1.09839	0
chr1	187070180	187070202	KHDRBS1_K562_rep02	-0.857951	0
chr1	187070188	187070201	SAFB2_K562_rep02	0.554238	0
chr1	187070260	187070302	SAFB_K562_rep01	0.400152	0
chr1	187070262	187070290	MTPAP_K562_rep01	0.519846	0
chr1	187070499	187070511	KHDRBS1_K562_rep01	-0.51343	0
chr1	187070602	187070621	IGF2BP1_K562_rep02	0.235047	0
chr1	187070614	187070649	SAFB_K562_rep02	0.409859	0
chr1	187070815	187070837	HNRNPL_K562_rep02	-1.09278	0
chr1	187071062	187071102	SAFB2_K562_rep02	-0.0307247	0
chr1	187071717	187071729	HNRNPL_K562_rep02	-0.507821	0
chr1	187071743	187071767	HNRNPUL1_K562_rep01	0.359151	0
chr1	187071846	187071911	KHDRBS1_K562_rep02	-0.272989	0
chr1	187071883	187071923	SAFB_K562_rep02	0.409859	0
chr1	187071886	187071915	HNRNPU_K562_rep02	-0.426413	0
chr1	187072252	187072276	SAFB2_K562_rep02	-0.615687	0
chr1	187072308	187072348	HNRNPU_K562_rep01	0.839426	0
chr1	187072514	187072544	SAFB2_K562_rep02	0.969275	0
chr1	187072620	187072654	FUS_K562_rep01	0.190279	0
chr1	187072637	187072659	SAFB_K562_rep01	0.400152	0
chr1	187072703	187072714	KHDRBS1_K562_rep01	0.901608	0
chr1	187072861	187072894	KHDRBS1_K562_rep01	0.901608	0
chr1	187072930	187072943	HNRNPU_K562_rep02	-0.841451	0
chr1	187072961	187072998	SAFB_K562_rep02	0.409859	0
chr1	187072971	187072977	HNRNPL_K562_rep02	0.492179	0
chr1	187073093	187073129	HNRNPU_K562_rep02	-0.426413	0
chr1	187073314	187073356	HNRNPU_K562_rep02	0.573587	0
chr1	187073411	187073426	KHDRBS1_K562_rep01	0.48657	0
chr1	187073499	187073534	HNRNPA1_K562_rep01	0.741288	0
chr1	187073522	187073563	SAFB2_K562_rep01	0.383809	0
chr1	187073573	187073600	HNRNPU_K562_rep02	-0.104485	0
chr1	187073843	187073881	KHDRBS1_K562_rep01	0.901608	0
chr1	187073873	187073931	HNRNPU_K562_rep02	-0.104485	0
chr1	187073896	187073913	SAFB2_K562_rep01	-0.616191	0
chr1	187073984	187073996	SAFB2_K562_rep01	0.120774	0
chr1	187074023	187074047	HNRNPL_K562_rep02	0.492179	0
chr1	187074201	187074232	SAFB2_K562_rep01	0.120774	0
chr1	187074395	187074424	HNRNPA1_K562_rep01	0.32625	0
chr1	187074409	187074435	SAFB_K562_rep02	0.824896	0
chr1	187074409	187074432	HNRNPL_K562_rep02	0.492179	0
chr1	187074492	187074538	SAFB_K562_rep01	0.81519	0
chr1	187074620	187074651	ILF3_K562_rep02	0.29066	0
chr1	187074647	187074692	HNRNPA1_K562_rep01	-0.258712	0
chr1	187074661	187074700	HNRNPU_K562_rep01	0.254464	0
chr1	187074666	187074709	SAFB_K562_rep01	0.400152	0
chr1	187074770	187074795	HNRNPU_K562_rep02	-0.426413	0
chr1	187074896	187074908	SAFB2_K562_rep01	0.383809	0
chr1	187074926	187074966	KHDRBS1_K562_rep01	-0.0983923	0
chr1	187074942	187074965	HNRNPL_K562_rep02	0.492179	0
chr1	187074992	187075036	SAFB2_K562_rep01	0.383809	0
chr1	187075091	187075141	KHDRBS1_K562_rep01	0.223536	0
chr1	187075123	187075155	MATR3_K562_rep02	0.217129	0
chr1	187075135	187075145	SAFB_K562_rep02	0.409859	0
chr1	187075681	187075718	HNRNPU_K562_rep02	-1.84145	0
chr1	187075684	187075726	SAFB_K562_rep02	0.824896	0
chr1	187075695	187075743	SAFB2_K562_rep02	0.291203	0
chr1	187075716	187075750	HNRNPL_K562_rep01	-0.808301	0
chr1	187075800	187075861	SAFB_K562_rep02	0.239934	0
chr1	187075818	187075858	SAFB2_K562_rep01	-0.201154	0
chr1	187076019	187076085	SAFB_K562_rep01	0.400152	0
chr1	187076039	187076072	ILF3_K562_rep01	0.031065	0
chr1	187076050	187076087	U2AF2_K562_rep02	-1.28564	0
chr1	187076054	187076089	KHDRBS1_K562_rep01	-1.09839	0
chr1	187076054	187076088	FXR1_K562_rep01	-0.350652	0
chr1	187076056	187076087	KHSRP_K562_rep02	-0.416048	0
chr1	187076061	187076082	KHSRP_K562_rep01	-0.36575	0
chr1	187076354	187076369	SAFB2_K562_rep01	0.383809	0
chr1	187076645	187076666	HNRNPU_K562_rep02	-0.841451	0
chr1	187076731	187076753	SAFB2_K562_rep01	0.798846	0
chr1	187076887	187076905	SAFB_K562_rep01	0.400152	0
chr1	187076947	187076983	KHDRBS1_K562_rep02	0.727011	0
chr1	187077061	187077104	SAFB2_K562_rep02	-0.0307247	0
chr1	187077065	187077112	SAFB_K562_rep01	0.81519	0
chr1	187077086	187077130	SAFB_K562_rep02	0.824896	0
chr1	187077091	187077144	HNRNPU_K562_rep02	-0.104485	0
chr1	187077401	187077417	HNRNPL_K562_rep02	-0.507821	0
chr1	187078231	187078301	HNRNPU_K562_rep02	0.573587	0
chr1	187078272	187078295	KHDRBS1_K562_rep02	-1.27299	0
chr1	187078386	187078394	PPIL4_K562_rep01	0.234875	0
chr1	187078608	187078668	HNRNPU_K562_rep02	0.573587	0
chr1	187079038	187079074	TAF15_K562_rep02	-0.00899153	0
chr1	187079039	187079084	SAFB_K562_rep02	0.824896	0
chr1	187079042	187079074	HNRNPL_K562_rep02	0.492179	0
chr1	187079259	187079321	SAFB2_K562_rep02	0.291203	0
chr1	187079390	187079429	SAFB_K562_rep01	0.400152	0
chr1	187079401	187079424	SAFB_K562_rep02	0.409859	0
chr1	187080016	187080029	KHDRBS1_K562_rep01	0.48657	0
chr1	187080253	187080301	KHSRP_K562_rep02	0.998989	0
chr1	187080399	187080440	KHSRP_K562_rep02	0.998989	0
chr1	187080436	187080498	KHDRBS1_K562_rep02	0.534366	0
chr1	187080475	187080497	HNRNPU_K562_rep02	-1.84145	0
chr1	187080524	187080573	SAFB_K562_rep02	0.824896	0
chr1	187080538	187080571	SAFB_K562_rep01	0.81519	0
chr1	187080561	187080600	HNRNPU_K562_rep02	-0.426413	0
chr1	187080658	187080673	HNRNPU_K562_rep02	-0.841451	0
chr1	187080839	187080883	SAFB_K562_rep01	0.400152	0
chr1	187080843	187080878	KHDRBS1_K562_rep02	-0.857951	0
chr1	187080848	187080884	SND1_K562_rep01	-0.822851	0
chr1	187080869	187080899	HNRNPU_K562_rep01	-0.160574	0
chr1	187081141	187081191	KHDRBS1_K562_rep01	-0.0983923	0
chr1	187081172	187081196	HNRNPU_K562_rep02	-0.841451	0
chr1	187081182	187081187	SAFB2_K562_rep02	0.554238	0
chr1	187081332	187081362	HNRNPU_K562_rep01	-0.160574	0
chr1	187081377	187081396	SAFB2_K562_rep02	-0.445762	0
chr1	187081378	187081412	PPIL4_K562_rep02	0.62519	0
chr1	187081494	187081553	KHDRBS1_K562_rep02	0.0489394	0
chr1	187081503	187081544	SAFB2_K562_rep01	0.798846	0
chr1	187082070	187082107	MTPAP_K562_rep01	0.519846	0
chr1	187082155	187082194	HNRNPL_K562_rep02	0.907216	0
chr1	187082488	187082514	PPIL4_K562_rep02	0.62519	0
chr1	187082501	187082530	SAFB_K562_rep02	0.824896	0
chr1	187082508	187082556	KHDRBS1_K562_rep02	-0.536023	0
chr1	187082890	187082925	PPIL4_K562_rep01	0.234875	0
chr1	187082967	187082995	SAFB_K562_rep02	0.824896	0
chr1	187083045	187083073	HNRNPU_K562_rep01	-0.160574	0
chr1	187083080	187083117	RBFOX2_K562_rep01	0.0551131	0
chr1	187083115	187083165	KHSRP_K562_rep02	0.998989	0
chr1	187083129	187083137	KHDRBS1_K562_rep02	0.311974	0
chr1	187083188	187083235	ILF3_K562_rep01	-0.13886	0
chr1	187083236	187083265	SAFB_K562_rep02	0.824896	0
chr1	187083395	187083427	HNRNPUL1_K562_rep02	0.972429	0
chr1	187083399	187083437	HNRNPU_K562_rep01	-0.160574	0
chr1	187083427	187083476	HNRNPU_K562_rep02	0.380941	0
chr1	187083435	187083450	SAFB2_K562_rep02	0.969275	0
chr1	187083710	187083771	KHDRBS1_K562_rep02	0.142049	0
chr1	187083739	187083800	SAFB2_K562_rep02	0.1392	0
chr1	187083764	187083788	SAFB2_K562_rep01	-0.201154	0
chr1	187084017	187084049	HNRNPU_K562_rep02	-0.104485	0
chr1	187084037	187084050	KHDRBS1_K562_rep02	0.727011	0
chr1	187084153	187084169	SAFB2_K562_rep02	0.969275	0
chr1	187084279	187084311	KHSRP_K562_rep02	0.583952	0
chr1	187084386	187084423	HNRNPU_K562_rep02	-0.104485	0
chr1	187084415	187084445	SAFB2_K562_rep01	0.0212387	0
chr1	187084736	187084772	PPIL4_K562_rep02	0.62519	0
chr1	187084923	187084960	SAFB_K562_rep01	0.400152	0
chr1	187084940	187084968	TAF15_K562_rep02	0.406046	0
chr1	187084973	187085010	PPIL4_K562_rep01	-0.765125	0
chr1	187084991	187085023	SAFB_K562_rep01	0.400152	0
chr1	187085026	187085035	KHDRBS1_K562_rep01	0.48657	0
chr1	187085196	187085264	U2AF2_K562_rep02	0.936754	0
chr1	187085328	187085362	U2AF2_K562_rep02	0.129399	0
chr1	187085333	187085369	PPIL4_K562_rep01	0.649912	0
chr1	187085765	187085784	HNRNPL_K562_rep02	0.492179	0
chr1	187085800	187085860	HNRNPU_K562_rep01	0.839426	0
chr1	187085803	187085829	PPIL4_K562_rep02	0.62519	0
chr1	187085810	187085826	HNRNPU_K562_rep02	-0.426413	0
chr1	187085909	187085971	KHDRBS1_K562_rep01	0.48657	0
chr1	187085978	187086028	SAFB_K562_rep01	0.81519	0
chr1	187086000	187086049	FUS_K562_rep01	0.997634	0
chr1	187086006	187086059	HNRNPL_K562_rep01	0.191699	0
chr1	187086015	187086048	PPIL4_K562_rep01	-1.35009	0
chr1	187086016	187086057	FUS_K562_rep02	0.465478	0
chr1	187086058	187086065	SAFB2_K562_rep01	0.798846	0
chr1	187086134	187086143	SAFB2_K562_rep01	-0.786116	0
chr1	187086175	187086209	PPIL4_K562_rep01	0.234875	0
chr1	187086253	187086259	ILF3_K562_rep01	0.031065	0
chr1	187086355	187086375	HNRNPL_K562_rep01	-0.223339	0
chr1	187086362	187086382	SAFB2_K562_rep02	0.969275	0
chr1	187086381	187086411	HNRNPL_K562_rep02	0.907216	0
chr1	187086393	187086429	KHSRP_K562_rep02	-0.416048	0
chr1	187086454	187086464	SAFB2_K562_rep02	0.554238	0
chr1	187086469	187086513	HNRNPU_K562_rep01	0.254464	0
chr1	187086486	187086527	KHSRP_K562_rep02	0.583952	0
chr1	187086838	187086841	KHDRBS1_K562_rep01	0.48657	0
chr1	187086880	187086899	KHDRBS1_K562_rep01	0.901608	0
chr1	187086908	187086939	FUS_K562_rep02	0.0504402	0
chr1	187086916	187086951	HLTF_K562_rep01	-0.506517	0
chr1	187086917	187086974	FUS_K562_rep01	0.775241	0
chr1	187086927	187086967	CSTF2T_K562_rep02	0.77367	0
chr1	187086940	187086976	RBFOX2_K562_rep01	0.640076	0
chr1	187086981	187087018	HNRNPU_K562_rep01	-0.423608	0
chr1	187087043	187087084	KHDRBS1_K562_rep02	0.534366	0
chr1	187087191	187087221	U2AF2_K562_rep02	-0.285639	0
chr1	187087210	187087244	FUS_K562_rep02	0.0504402	0
chr1	187087243	187087257	SAFB_K562_rep02	0.409859	0
chr1	187087307	187087325	PPIL4_K562_rep02	0.62519	0
chr1	187087343	187087375	HNRNPL_K562_rep02	-0.507821	0
chr1	187087406	187087438	HNRNPU_K562_rep01	0.254464	0
chr1	187087413	187087426	HNRNPU_K562_rep02	-0.426413	0
chr1	187087510	187087547	HNRNPU_K562_rep02	-0.104485	0
chr1	187087544	187087557	KHDRBS1_K562_rep02	-0.688026	0
chr1	187087612	187087653	SAFB_K562_rep02	0.409859	0
chr1	187087743	187087758	SAFB2_K562_rep02	0.969275	0
chr1	187087837	187087868	SAFB2_K562_rep02	0.554238	0
chr1	187087996	187088036	SND1_K562_rep02	-0.026536	0
chr1	187088033	187088079	SAFB_K562_rep01	0.81519	0
chr1	187088118	187088145	HNRNPL_K562_rep02	0.492179	0
chr1	187088230	187088277	KHDRBS1_K562_rep02	0.727011	0
chr1	187088244	187088295	HNRNPL_K562_rep02	0.229145	0
chr1	187088306	187088337	TAF15_K562_rep02	0.575971	0
chr1	187088803	187088836	KHDRBS1_K562_rep02	-0.272989	0
chr1	187088819	187088833	HNRNPU_K562_rep02	-0.841451	0
chr1	187088849	187088862	HNRNPL_K562_rep01	0.776661	0
chr1	187089092	187089121	HNRNPL_K562_rep02	0.492179	0
chr1	187089127	187089141	KHDRBS1_K562_rep01	0.48657	0
chr1	187089205	187089243	HNRNPA1_K562_rep01	0.741288	0
chr1	187089212	187089257	SAFB_K562_rep01	0.81519	0
chr1	187089329	187089352	TARDBP_K562_rep02	0.894726	0
chr1	187089419	187089450	SAFB2_K562_rep01	0.798846	0
chr1	187089579	187089610	HNRNPU_K562_rep01	-0.160574	0
chr1	187089666	187089680	KHDRBS1_K562_rep02	0.311974	0
chr1	187089732	187089759	PPIL4_K562_rep01	0.234875	0
chr1	187089732	187089806	HNRNPU_K562_rep02	0.895515	0
chr1	187090034	187090091	SAFB_K562_rep02	0.409859	0
chr1	187090050	187090079	SAFB2_K562_rep02	0.969275	0
chr1	187090238	187090283	SAFB2_K562_rep01	0.383809	0
chr1	187090479	187090539	SAFB2_K562_rep02	0.291203	0
chr1	187090511	187090520	SAFB2_K562_rep01	-0.616191	0
chr1	187090512	187090545	PPIL4_K562_rep01	0.234875	0
chr1	187090512	187090528	HNRNPU_K562_rep02	-0.841451	0
chr1	187090794	187090829	ILF3_K562_rep02	-0.70934	0
chr1	187090826	187090860	SAFB_K562_rep01	0.400152	0
chr1	187090828	187090895	HNRNPU_K562_rep02	-0.104485	0
chr1	187090918	187090945	HNRNPL_K562_rep02	-0.507821	0
chr1	187090921	187090938	HNRNPL_K562_rep01	-0.223339	0
chr1	187090991	187091017	HNRNPL_K562_rep01	0.776661	0
chr1	187091084	187091117	HNRNPL_K562_rep02	-1.09278	0
chr1	187091194	187091238	ILF3_K562_rep02	0.29066	0
chr1	187091360	187091368	HNRNPU_K562_rep02	-0.841451	0
chr1	187091547	187091611	HNRNPC_K562_rep01	0.820764	0
chr1	187091555	187091585	HNRNPL_K562_rep02	-0.507821	0
chr1	187091573	187091583	HNRNPU_K562_rep02	-0.841451	0
chr1	187091868	187091887	KHDRBS1_K562_rep02	0.311974	0
chr1	187091926	187091955	FUS_K562_rep02	0.0504402	0
chr1	187092065	187092068	HNRNPU_K562_rep02	-0.841451	0
chr1	187092292	187092324	SAFB_K562_rep02	0.409859	0
chr1	187092293	187092314	PPIL4_K562_rep02	0.62519	0
chr1	187092607	187092625	KHDRBS1_K562_rep02	-0.688026	0
chr1	187093030	187093044	HNRNPU_K562_rep02	-0.104485	0
chr1	187093462	187093498	PPIL4_K562_rep01	0.234875	0
chr1	187093558	187093598	SAFB2_K562_rep02	0.554238	0
chr1	187094049	187094066	SAFB2_K562_rep01	-0.616191	0
chr1	187094241	187094269	SAFB2_K562_rep01	0.798846	0
chr1	187094243	187094288	KHSRP_K562_rep02	-0.00101077	0
chr1	187094309	187094331	U2AF2_K562_rep02	-0.285639	0
chr1	187094336	187094343	SAFB2_K562_rep01	0.383809	0
chr1	187094382	187094432	SAFB_K562_rep01	0.81519	0
chr1	187094387	187094424	KHDRBS1_K562_rep01	-0.0983923	0
chr1	187094419	187094451	KHSRP_K562_rep02	-0.416048	0
chr1	187094423	187094457	HNRNPU_K562_rep02	-0.841451	0
chr1	187094579	187094615	KHDRBS1_K562_rep02	0.727011	0
chr1	187094591	187094618	HNRNPU_K562_rep01	-0.160574	0
chr1	187094670	187094716	SAFB2_K562_rep01	0.798846	0
chr1	187095382	187095407	HNRNPA1_K562_rep01	0.32625	0
chr1	187095560	187095576	KHDRBS1_K562_rep01	0.901608	0
chr1	187095782	187095836	SAFB2_K562_rep01	0.0212387	0
chr1	187095818	187095855	SAFB_K562_rep01	0.400152	0
chr1	187095942	187095963	HNRNPU_K562_rep02	-0.841451	0
chr1	187096151	187096179	HNRNPU_K562_rep02	-0.841451	0
chr1	187096383	187096419	SAFB_K562_rep01	0.400152	0
chr1	187096633	187096657	KHDRBS1_K562_rep02	0.727011	0
chr1	187096753	187096786	RBFOX2_K562_rep01	-0.359924	0
chr1	187096797	187096829	HNRNPU_K562_rep02	-1.84145	0
chr1	187096801	187096830	HNRNPL_K562_rep01	0.776661	0
chr1	187096806	187096828	PPIL4_K562_rep01	0.234875	0
chr1	187096816	187096863	KHDRBS1_K562_rep01	-0.612965	0
chr1	187096821	187096864	KHDRBS1_K562_rep02	-1.00995	0
chr1	187097004	187097036	PPIL4_K562_rep01	0.649912	0
chr1	187097083	187097116	FUS_K562_rep01	0.512207	0
chr1	187097091	187097098	PPIL4_K562_rep01	0.234875	0
chr1	187097106	187097177	HLTF_K562_rep01	-0.0914791	0
chr1	187097149	187097218	HLTF_K562_rep02	0.425806	0
chr1	187097315	187097330	PPIL4_K562_rep01	0.234875	0
chr1	187097327	187097351	RBM15_K562_rep02	0.970136	0
chr1	187097345	187097358	HLTF_K562_rep02	-0.574194	0
chr1	187097445	187097457	PPIL4_K562_rep01	0.234875	0
chr1	187097449	187097466	FUS_K562_rep01	0.190279	0
chr1	187097547	187097599	PPIL4_K562_rep01	0.971841	0
chr1	187097574	187097589	SAFB_K562_rep02	0.824896	0
chr1	187097697	187097723	KHDRBS1_K562_rep02	0.727011	0
chr1	187097774	187097801	FUS_K562_rep01	0.190279	0
chr1	187098117	187098145	RBFOX2_K562_rep01	-0.529849	0
chr1	187098471	187098506	HNRNPL_K562_rep02	0.907216	0
chr1	187098476	187098567	SAFB_K562_rep02	0.409859	0
chr1	187098480	187098515	HNRNPL_K562_rep01	0.776661	0
chr1	187098578	187098605	HNRNPU_K562_rep01	-1.16057	0
chr1	187098586	187098616	HNRNPU_K562_rep02	-0.841451	0
chr1	187098595	187098631	SAFB_K562_rep02	0.409859	0
chr1	187098618	187098629	KHDRBS1_K562_rep01	0.901608	0
chr1	187098621	187098653	HNRNPL_K562_rep02	0.907216	0
chr1	187098647	187098664	HNRNPL_K562_rep01	0.776661	0
chr1	187098743	187098779	PPIL4_K562_rep01	0.234875	0
chr1	187098748	187098778	HNRNPL_K562_rep02	0.492179	0
chr1	187098753	187098783	PPIL4_K562_rep02	0.62519	0
chr1	187098910	187098935	PPIL4_K562_rep02	0.62519	0
chr1	187098965	187099013	FUS_K562_rep01	0.512207	0
chr1	187098972	187099007	PPIL4_K562_rep02	0.62519	0
chr1	187098975	187099005	KHDRBS1_K562_rep01	-0.0983923	0
chr1	187099257	187099270	KHDRBS1_K562_rep01	0.901608	0
chr1	187099283	187099328	KHDRBS1_K562_rep02	0.727011	0
chr1	187099425	187099468	SAFB_K562_rep02	0.146824	0
chr1	187099558	187099589	SAFB_K562_rep01	0.400152	0
chr1	187099675	187099693	KHDRBS1_K562_rep02	0.727011	0
chr1	187099735	187099748	KHDRBS1_K562_rep01	-0.0983923	0
chr1	187099784	187099823	PPIL4_K562_rep01	0.971841	0
chr1	187099790	187099816	KHDRBS1_K562_rep01	0.901608	0
chr1	187099795	187099823	HNRNPL_K562_rep02	0.492179	0
chr1	187099904	187099950	HLTF_K562_rep02	-0.159157	0
chr1	187099913	187099992	HLTF_K562_rep01	0.908521	0
chr1	187099918	187099971	HNRNPC_K562_rep01	0.235801	0
chr1	187099953	187099990	SAFB_K562_rep01	0.81519	0
chr1	187100346	187100386	PPIL4_K562_rep01	0.649912	0
chr1	187100574	187100637	HLTF_K562_rep02	0.162771	0
chr1	187100581	187100619	FUS_K562_rep01	0.775241	0
chr1	187100649	187100655	HLTF_K562_rep01	-0.0914791	0
chr1	187100720	187100769	HNRNPC_K562_rep01	0.557729	0
chr1	187100742	187100797	HLTF_K562_rep01	-0.0914791	0
chr1	187100748	187100804	HLTF_K562_rep02	-0.159157	0
chr1	187100859	187100887	KHDRBS1_K562_rep01	0.901608	0
chr1	187100919	187100951	PPIL4_K562_rep02	0.62519	0
chr1	187101052	187101088	SAFB_K562_rep01	0.400152	0
chr1	187101091	187101092	KHDRBS1_K562_rep02	0.727011	0
chr1	187101133	187101172	HLTF_K562_rep02	-0.159157	0
chr1	187101199	187101249	HLTF_K562_rep01	0.908521	0
chr1	187101339	187101354	KHDRBS1_K562_rep02	0.727011	0
chr1	187101393	187101431	HLTF_K562_rep02	-0.574194	0
chr1	187101482	187101508	HLTF_K562_rep01	-0.506517	0
chr1	187101528	187101567	KHDRBS1_K562_rep02	0.534366	0
chr1	187101709	187101719	SAFB_K562_rep02	0.409859	0
chr1	187101925	187101967	PPIL4_K562_rep01	0.971841	0
chr1	187101925	187101967	SAFB_K562_rep01	0.81519	0
chr1	187101925	187101957	NOLC1_K562_rep02	0.786182	0
chr1	187102097	187102127	KHDRBS1_K562_rep02	0.727011	0
chr1	187102105	187102132	PPIL4_K562_rep01	-0.350088	0
chr1	187102275	187102314	SAFB_K562_rep02	0.824896	0
chr1	187102284	187102376	HLTF_K562_rep01	0.908521	0
chr1	187102289	187102301	KHDRBS1_K562_rep02	-1.27299	0
chr1	187102292	187102323	FUS_K562_rep01	0.190279	0
chr1	187102454	187102487	HLTF_K562_rep01	-0.506517	0
chr1	187102570	187102605	HLTF_K562_rep02	-0.159157	0
chr1	187102638	187102648	SAFB_K562_rep01	0.400152	0
chr1	187102733	187102767	FUS_K562_rep01	0.512207	0
chr1	187102741	187102762	PPIL4_K562_rep02	0.62519	0
chr1	187102764	187102784	KHDRBS1_K562_rep01	0.48657	0
chr1	187102812	187102862	KHDRBS1_K562_rep02	0.534366	0
chr1	187102842	187102851	KHDRBS1_K562_rep01	0.223536	0
chr1	187102927	187102949	HNRNPL_K562_rep02	-1.09278	0
chr1	187102976	187102998	FUS_K562_rep01	0.512207	0
chr1	187103141	187103175	RBFOX2_K562_rep01	0.640076	0
chr1	187103311	187103347	HNRNPL_HepG2_rep01	0.957892	0
chr1	187103326	187103361	FUS_K562_rep02	0.0504402	0
chr1	187103444	187103499	HLTF_K562_rep02	-0.159157	0
chr1	187103457	187103488	PPIL4_K562_rep02	0.62519	0
chr1	187103492	187103512	AGGF1_K562_rep02	0.492354	0
chr1	187103659	187103677	KHDRBS1_K562_rep01	0.901608	0
chr1	187103765	187103787	HNRNPC_K562_rep01	0.235801	0
chr1	187103805	187103830	SAFB_K562_rep02	0.824896	0
chr1	187103935	187103961	SAFB_K562_rep02	0.824896	0
chr1	187104066	187104089	KHDRBS1_K562_rep01	0.901608	0
chr1	187104080	187104111	SAFB_K562_rep02	0.824896	0
chr1	187104227	187104253	FUS_K562_rep01	0.512207	0
chr1	187104256	187104279	NOLC1_K562_rep02	0.786182	0
chr1	187104405	187104439	KHDRBS1_K562_rep02	0.0489394	0
chr1	187104464	187104471	EIF3G_K562_rep02	0.929849	0
chr1	187104471	187104502	EIF3G_K562_rep02	0.929849	0
chr1	187104537	187104592	HLTF_K562_rep02	-0.159157	0
chr1	187104623	187104653	PPIL4_K562_rep02	0.62519	0
chr1	187104995	187105022	TAF15_K562_rep01	0.00608265	0
chr1	187105000	187105051	RBFOX2_K562_rep01	0.377041	0
chr1	187105013	187105047	BUD13_K562_rep01	-0.15342	0
chr1	187105038	187105064	PPIL4_K562_rep01	0.234875	0
chr1	187105315	187105350	HLTF_K562_rep02	-0.159157	0
chr1	187105379	187105408	PPIL4_K562_rep01	0.234875	0
chr1	187105451	187105498	HLTF_K562_rep01	-0.0914791	0
chr1	187105459	187105493	SAFB_K562_rep01	0.81519	0
chr1	187105620	187105654	SAFB_K562_rep02	0.409859	0
chr1	187105838	187105847	KHDRBS1_K562_rep02	0.727011	0
chr1	187105932	187105966	PPIL4_K562_rep01	0.649912	0
chr1	187105999	187106043	HNRNPL_K562_rep02	-0.0927836	0
chr1	187106061	187106076	SAFB2_K562_rep01	0.798846	0
chr1	187106061	187106129	HNRNPL_K562_rep02	0.322254	0
chr1	187106104	187106138	RBFOX2_K562_rep01	0.640076	0
chr1	187106264	187106305	KHSRP_K562_rep02	0.583952	0
chr1	187106356	187106386	SAFB2_K562_rep01	0.120774	0
chr1	187106369	187106404	KHDRBS1_K562_rep02	0.534366	0
chr1	187106371	187106415	HNRNPU_K562_rep01	-0.160574	0
chr1	187106390	187106427	BUD13_K562_rep01	0.431543	0
chr1	187106465	187106496	HNRNPL_K562_rep02	0.492179	0
chr1	187106478	187106509	KHDRBS1_K562_rep02	-0.536023	0
chr1	187106482	187106518	HNRNPU_K562_rep02	-0.841451	0
chr1	187106658	187106699	HNRNPU_K562_rep02	-1.42641	0
chr1	187107052	187107101	HNRNPA1_K562_rep01	0.741288	0
chr1	187107059	187107080	PPIL4_K562_rep01	0.234875	0
chr1	187107115	187107159	HNRNPL_K562_rep02	-0.355818	0
chr1	187107164	187107219	SAFB2_K562_rep01	0.120774	0
chr1	187107240	187107275	KHDRBS1_K562_rep02	0.727011	0
chr1	187107415	187107456	KHSRP_K562_rep02	0.998989	0
chr1	187107461	187107495	KHSRP_K562_rep01	0.63425	0
chr1	187107739	187107774	KHDRBS1_K562_rep01	-0.51343	0
chr1	187107759	187107810	PPIL4_K562_rep01	0.971841	0
chr1	187107777	187107807	KHDRBS1_K562_rep02	0.311974	0
chr1	187107872	187107907	HNRNPU_K562_rep01	-0.160574	0
chr1	187107873	187107901	SAFB2_K562_rep01	0.383809	0
chr1	187109125	187109146	TIA1_K562_rep02	-0.0053654	0
chr1	187109264	187109274	RBFOX2_K562_rep01	0.640076	0
chr1	187109274	187109305	RBFOX2_K562_rep01	0.640076	0
chr1	187109504	187109546	SAFB2_K562_rep02	-0.0307247	0
chr1	187109914	187109951	HLTF_K562_rep01	-0.506517	0
chr1	187109932	187109978	HLTF_K562_rep02	-0.159157	0
chr1	187109976	187110019	SAFB2_K562_rep01	0.798846	0
chr1	187110127	187110173	HLTF_K562_rep01	-0.0914791	0
chr1	187110257	187110301	SAFB_K562_rep02	0.824896	0
chr1	187110260	187110302	SAFB2_K562_rep02	0.969275	0
chr1	187110333	187110403	HLTF_K562_rep01	0.493483	0
chr1	187110345	187110391	SAFB2_K562_rep01	0.120774	0
chr1	187110346	187110388	SAFB2_K562_rep02	-0.0307247	0
chr1	187111281	187111313	HLTF_K562_rep02	-0.574194	0
chr1	187111763	187111783	SAFB_K562_rep02	0.824896	0
chr1	187112711	187112756	SAFB_K562_rep01	0.81519	0
chr1	187112715	187112753	RBFOX2_K562_rep01	0.0551131	0
chr1	187112721	187112757	SAFB_K562_rep02	0.409859	0
chr1	187112724	187112754	SAFB2_K562_rep02	0.969275	0
chr1	187112880	187112913	SAFB_K562_rep01	0.400152	0
chr1	187112945	187112979	ILF3_K562_rep01	0.031065	0
chr1	187112967	187113014	SAFB_K562_rep02	0.824896	0
chr1	187112993	187113026	KHDRBS1_K562_rep02	0.727011	0
chr1	187113022	187113047	KHDRBS1_K562_rep01	0.901608	0
chr1	187113022	187113057	KHSRP_K562_rep02	0.583952	0
chr1	187113036	187113079	SAFB_K562_rep01	0.400152	0
chr1	187113079	187113109	HNRNPL_K562_rep01	-0.223339	0
chr1	187113104	187113128	NONO_K562_rep01	0.988859	0
chr1	187113352	187113398	HLTF_K562_rep01	-0.0914791	0
chr1	187113354	187113382	HNRNPL_K562_rep01	0.776661	0
chr1	187113623	187113655	CSTF2T_K562_rep02	0.77367	0
chr1	187113632	187113655	KHDRBS1_K562_rep02	0.727011	0
chr1	187113731	187113755	HLTF_K562_rep02	-0.574194	0
chr1	187113961	187113993	PPIL4_K562_rep02	0.62519	0
chr1	187114092	187114144	HLTF_K562_rep01	-0.769551	0
chr1	187114206	187114239	HNRNPL_K562_rep01	0.776661	0
chr1	187114212	187114235	HNRNPU_K562_rep02	-0.841451	0
chr1	187114280	187114330	SAFB_K562_rep01	0.81519	0
chr1	187114303	187114312	KHSRP_K562_rep01	0.63425	0
chr1	187114306	187114317	SAFB2_K562_rep01	-0.786116	0
chr1	187114363	187114429	PPIL4_K562_rep01	0.457267	0
chr1	187114363	187114398	HNRNPL_K562_rep02	0.907216	0
chr1	187114383	187114419	PPIL4_K562_rep02	0.0402275	0
chr1	187114634	187114643	SAFB2_K562_rep02	0.554238	0
chr1	187114739	187114801	SAFB2_K562_rep02	0.554238	0
chr1	187114757	187114782	FUS_K562_rep02	0.0504402	0
chr1	187115770	187115809	U2AF2_K562_rep02	0.129399	0
chr1	187116001	187116044	U2AF2_K562_rep02	0.129399	0
chr1	187116099	187116140	U2AF2_K562_rep02	-0.285639	0
chr1	187116349	187116404	KHSRP_K562_rep02	0.320917	0
chr1	187116556	187116602	KHSRP_K562_rep02	-0.00101077	0
chr1	187116564	187116595	HNRNPL_K562_rep02	-0.507821	0
chr1	187116567	187116588	SAFB2_K562_rep01	0.383809	0
chr1	187117601	187117629	KHSRP_K562_rep02	0.583952	0
chr1	187118183	187118218	ILF3_K562_rep01	0.031065	0
chr1	187119226	187119255	KHSRP_K562_rep01	0.63425	0
chr1	187119410	187119463	HNRNPC_K562_rep02	0.0343465	0
chr1	187119419	187119454	MATR3_K562_rep02	0.217129	0
chr1	187119868	187119905	KHSRP_K562_rep01	0.63425	0
chr1	187120076	187120115	KHSRP_K562_rep01	0.371216	0
chr1	187120188	187120200	KHSRP_K562_rep02	0.583952	0
chr1	187121290	187121361	HNRNPC_K562_rep02	0.0343465	0
chr1	187121560	187121575	KHSRP_K562_rep01	-0.950712	0
chr1	187121714	187121742	KHDRBS1_K562_rep02	0.311974	0
chr1	187122766	187122827	KHSRP_K562_rep02	0.583952	0
chr1	187122838	187122866	NONO_K562_rep01	0.988859	0
chr1	187122854	187122921	HNRNPU_K562_rep02	-0.104485	0
chr1	187123210	187123228	HNRNPU_K562_rep01	-0.160574	0
chr1	187123357	187123391	HNRNPU_K562_rep02	-1.42641	0
chr1	187123391	187123419	HNRNPU_K562_rep01	-0.160574	0
chr1	187123562	187123615	HNRNPU_K562_rep02	-0.426413	0
chr1	187124066	187124095	HNRNPU_K562_rep02	-0.841451	0
chr1	187124407	187124469	HNRNPC_K562_rep02	0.159877	0
chr1	187124583	187124621	SAFB_K562_rep01	0.400152	0
chr1	187124605	187124631	HNRNPU_K562_rep01	-0.160574	0
chr1	187126436	187126466	SAFB_K562_rep01	0.400152	0
chr1	187126643	187126662	KHSRP_K562_rep02	0.583952	0
chr1	187126647	187126675	KHSRP_K562_rep01	0.63425	0
chr1	187126809	187126843	SAFB2_K562_rep01	0.383809	0
chr1	187126996	187127016	IGF2BP2_K562_rep02	-0.168713	0
chr1	187127226	187127259	KHDRBS1_K562_rep01	0.901608	0
chr1	187127369	187127431	SAFB2_K562_rep02	0.291203	0
chr1	187128186	187128240	U2AF2_K562_rep02	0.451327	0
chr1	187128349	187128385	SAFB2_K562_rep02	0.969275	0
chr1	187128382	187128409	HNRNPU_K562_rep02	-0.841451	0
chr1	187128406	187128479	KHSRP_K562_rep02	0.583952	0
chr1	187128463	187128552	HNRNPU_K562_rep02	-1.01138	0
chr1	187128798	187128833	SAFB2_K562_rep01	-0.201154	0
chr1	187128817	187128844	KHDRBS1_K562_rep02	0.0489394	0
chr1	187128899	187128971	SAFB2_K562_rep01	0.383809	0
chr1	187128917	187128982	SAFB2_K562_rep02	0.554238	0
chr1	187128952	187128981	HNRNPA1_K562_rep01	-0.67375	0
chr1	187128964	187128974	KHDRBS1_K562_rep01	0.48657	0
chr1	187128994	187129013	HNRNPU_K562_rep01	-0.160574	0
chr1	187129087	187129110	KHDRBS1_K562_rep02	0.311974	0
chr1	187129204	187129254	HNRNPU_K562_rep02	-0.104485	0
chr1	187129249	187129284	TARDBP_K562_rep02	0.894726	0
chr1	187129305	187129338	ILF3_K562_rep02	0.29066	0
chr1	187129310	187129327	KHDRBS1_K562_rep01	0.48657	0
chr1	187129951	187129986	FUS_K562_rep02	0.0504402	0
chr1	187130125	187130161	SAFB2_K562_rep02	0.969275	0
chr1	187130139	187130173	HNRNPL_K562_rep02	0.492179	0
chr1	187130155	187130192	SAFB_K562_rep02	0.409859	0
chr1	187130298	187130323	TIA1_K562_rep02	0.994635	0
chr1	187130368	187130409	HNRNPL_K562_rep02	0.907216	0
chr1	187130388	187130430	SAFB2_K562_rep01	-0.201154	0
chr1	187130430	187130462	HNRNPU_K562_rep02	-0.841451	0
chr1	187130626	187130649	KHDRBS1_K562_rep02	0.311974	0
chr1	187130852	187130865	FUS_K562_rep02	0.0504402	0
chr1	187131186	187131214	KHSRP_K562_rep02	-0.416048	0
chr1	187131273	187131302	KHDRBS1_K562_rep02	0.727011	0
chr1	187131438	187131476	KHSRP_K562_rep02	0.583952	0
chr1	187131445	187131479	U2AF2_K562_rep02	-0.285639	0
chr1	187131833	187131877	SAFB2_K562_rep01	-0.201154	0
chr1	187131855	187131923	SAFB2_K562_rep02	0.554238	0
chr1	187131869	187131897	ILF3_K562_rep01	0.031065	0
chr1	187131974	187131997	HNRNPU_K562_rep02	-0.841451	0
chr1	187132010	187132036	SAFB_K562_rep02	0.409859	0
chr1	187132354	187132391	KHDRBS1_K562_rep01	0.223536	0
chr1	187132470	187132519	SAFB_K562_rep02	0.824896	0
chr1	187132573	187132595	SAFB2_K562_rep01	0.798846	0
chr1	187132580	187132598	KHDRBS1_K562_rep01	-0.51343	0
chr1	187132775	187132813	SAFB_K562_rep02	0.409859	0
chr1	187133155	187133197	HNRNPA1_K562_rep01	0.0632161	0
chr1	187133182	187133197	KHDRBS1_K562_rep02	0.727011	0
chr1	187133339	187133360	KHDRBS1_K562_rep02	0.727011	0
chr1	187133588	187133631	SAFB2_K562_rep01	0.798846	0
chr1	187133629	187133672	HNRNPL_K562_rep02	0.229145	0
chr1	187133665	187133699	SAFB_K562_rep02	0.409859	0
chr1	187133902	187133945	KHDRBS1_K562_rep01	0.901608	0
chr1	187133990	187134027	SAFB2_K562_rep01	0.383809	0
chr1	187134053	187134083	SAFB2_K562_rep02	0.554238	0
chr1	187134132	187134182	HNRNPC_K562_rep01	0.557729	0
chr1	187134137	187134176	SAFB_K562_rep01	0.400152	0
chr1	187134147	187134182	HNRNPU_K562_rep02	-0.841451	0
chr1	187134148	187134177	HNRNPL_K562_rep01	0.776661	0
chr1	187134242	187134279	HNRNPL_K562_rep02	0.907216	0
chr1	187134362	187134401	FUS_K562_rep02	0.0504402	0
chr1	187134512	187134559	SAFB2_K562_rep02	0.969275	0
chr1	187134517	187134546	HNRNPL_K562_rep02	0.492179	0
chr1	187134719	187134743	KHDRBS1_K562_rep02	0.311974	0
chr1	187135147	187135183	KHDRBS1_K562_rep01	0.901608	0
chr1	187135319	187135323	KHSRP_K562_rep02	0.998989	0
chr1	187135373	187135413	SAFB2_K562_rep02	0.969275	0
chr1	187135441	187135478	HNRNPU_K562_rep01	-0.160574	0
chr1	187135454	187135485	U2AF2_K562_rep02	-0.285639	0
chr1	187135474	187135560	FUS_K562_rep01	0.997634	0
chr1	187135626	187135671	HNRNPU_K562_rep02	-0.426413	0
chr1	187135628	187135657	HNRNPU_K562_rep01	-0.160574	0
chr1	187135942	187135963	HNRNPU_K562_rep02	-0.426413	0
chr1	187135959	187136026	HNRNPA1_K562_rep01	0.548643	0
chr1	187135984	187136016	KHDRBS1_K562_rep02	0.727011	0
chr1	187136175	187136203	KHDRBS1_K562_rep02	0.727011	0
chr1	187136244	187136300	HNRNPU_K562_rep02	-0.104485	0
chr1	187136310	187136358	SAFB2_K562_rep02	0.969275	0
chr1	187136666	187136698	KHDRBS1_K562_rep02	0.727011	0
chr1	187136684	187136710	HNRNPUL1_K562_rep02	0.972429	0
chr1	187136894	187136910	KHSRP_K562_rep02	0.998989	0
chr1	187136990	187137031	HNRNPL_K562_rep02	-0.677746	0
chr1	187136995	187137032	KHDRBS1_K562_rep02	0.727011	0
chr1	187136996	187137032	HNRNPU_K562_rep01	0.254464	0
chr1	187137016	187137044	KHSRP_K562_rep02	0.998989	0
chr1	187137262	187137276	SAFB2_K562_rep01	0.798846	0
chr1	187137271	187137329	HNRNPU_K562_rep02	-0.841451	0
chr1	187137367	187137394	LIN28B_K562_rep02	0.985916	0
chr1	187137409	187137451	ILF3_K562_rep02	0.29066	0
chr1	187137435	187137458	KHDRBS1_K562_rep02	0.311974	0
chr1	187137492	187137527	SAFB2_K562_rep01	-0.201154	0
chr1	187137574	187137603	NONO_K562_rep01	0.988859	0
chr1	187137801	187137847	SAFB_K562_rep02	0.824896	0
chr1	187138377	187138385	SAFB_K562_rep01	0.400152	0
chr1	187138385	187138412	SAFB_K562_rep01	0.400152	0
chr1	187139910	187139944	RBFOX2_K562_rep01	0.377041	0
chr1	187139922	187139941	TARDBP_K562_rep02	0.894726	0
chr1	187140524	187140558	PPIL4_K562_rep02	0.62519	0
chr1	187140780	187140803	HNRNPU_K562_rep01	-0.160574	0
[truncated: 684 more rows]

## Sheet: ASAR6-141
Figure 1-table supplement 1
CHR	Start	Stop	RBP_Cell line_exp	Fold Enrichment	log10(pvalue)
chr6	141167127	141167163	PABPC4_K562_rep01	6.59878	45.1318
chr6	141167127	141167163	PABPC4_K562_rep01	6.59878	45.1318
chr6	141167131	141167168	PABPC4_K562_rep02	6.6946	22.824
chr6	141167131	141167168	PABPC4_K562_rep02	6.6946	22.824
chr6	141172721	141172811	PTBP1_HepG2_rep01	2.67557	5.77075
chr6	141172721	141172811	PTBP1_HepG2_rep01	2.67557	5.77075
chr6	141171306	141171370	QKI_HepG2_rep01	3.10642	5.10768
chr6	141171306	141171370	QKI_HepG2_rep01	3.10642	5.10768
chr6	141172729	141172812	PTBP1_HepG2_rep02	2.58414	4.89133
chr6	141172729	141172812	PTBP1_HepG2_rep02	2.58414	4.89133
chr6	141172873	141172945	QKI_HepG2_rep01	2.39182	4.34406
chr6	141172873	141172945	QKI_HepG2_rep01	2.39182	4.34406
chr6	141173881	141173945	TIAL1_HepG2_rep01	3.2781	4.25556
chr6	141173881	141173945	TIAL1_HepG2_rep01	3.2781	4.25556
chr6	141167482	141167536	PRPF8_HepG2_rep02	3.04982	4.24089
chr6	141167482	141167536	PRPF8_HepG2_rep02	3.04982	4.24089
chr6	141172792	141172846	HNRNPL_HepG2_rep02	3.24546	4.01234
chr6	141172792	141172846	HNRNPL_HepG2_rep02	3.24546	4.01234
chr6	141169011	141169069	HNRNPL_HepG2_rep01	2.01679	3.91535
chr6	141169011	141169069	HNRNPL_HepG2_rep01	2.01679	3.91535
chr6	141172866	141172945	QKI_HepG2_rep02	2.24287	3.90008
chr6	141172866	141172945	QKI_HepG2_rep02	2.24287	3.90008
chr6	141173126	141173183	TBRG4_HepG2_rep01	3.91082	3.79631
chr6	141173126	141173183	TBRG4_HepG2_rep01	3.91082	3.79631
chr6	141172783	141172851	HNRNPL_HepG2_rep01	3.12782	3.77546
chr6	141172783	141172851	HNRNPL_HepG2_rep01	3.12782	3.77546
chr6	141172862	141172957	HNRNPL_HepG2_rep02	1.98243	3.55802
chr6	141172862	141172957	HNRNPL_HepG2_rep02	1.98243	3.55802
chr6	141171306	141171371	QKI_HepG2_rep02	2.82141	3.51714
chr6	141171306	141171371	QKI_HepG2_rep02	2.82141	3.51714
chr6	141173887	141173942	TIAL1_HepG2_rep02	3.11209	3.47089
chr6	141173887	141173942	TIAL1_HepG2_rep02	3.11209	3.47089
chr6	141172709	141172806	U2AF2_HepG2_rep01	2.79789	3.46866
chr6	141172709	141172806	U2AF2_HepG2_rep01	2.79789	3.46866
chr6	141167130	141167171	HNRNPC_HepG2_rep01	3.67379	3.43813
chr6	141167130	141167171	HNRNPC_HepG2_rep01	3.67379	3.43813
chr6	141169166	141169213	HNRNPL_HepG2_rep01	3.69486	3.27714
chr6	141169166	141169213	HNRNPL_HepG2_rep01	3.69486	3.27714
chr6	141171938	141171948	SF3B1_K562_rep01	5.2136	3.25737
chr6	141171938	141171948	SF3B1_K562_rep01	5.2136	3.25737
chr6	141171898	141171973	QKI_HepG2_rep02	2.33237	3.12747
chr6	141171898	141171973	QKI_HepG2_rep02	2.33237	3.12747
chr6	141169824	141169900	HNRNPC_HepG2_rep01	1.84441	3.02364
chr6	141169824	141169900	HNRNPC_HepG2_rep01	1.84441	3.02364
chr6	141171312	141171376	HNRNPL_HepG2_rep01	2.23091	2.99088
chr6	141171312	141171376	HNRNPL_HepG2_rep01	2.23091	2.99088
chr6	141171948	141171980	SF3B1_K562_rep01	4.62864	2.96913
chr6	141171948	141171980	SF3B1_K562_rep01	4.62864	2.96913
chr6	141173848	141173929	TIA1_K562_rep02	2.7316	2.69635
chr6	141173848	141173929	TIA1_K562_rep02	2.7316	2.69635
chr6	141171644	141171653	TBRG4_HepG2_rep01	3.91082	2.63121
chr6	141171644	141171653	TBRG4_HepG2_rep01	3.91082	2.63121
chr6	141173852	141173942	TIA1_K562_rep01	2.78565	2.61804
chr6	141173852	141173942	TIA1_K562_rep01	2.78565	2.61804
chr6	141171168	141171178	SF3B1_K562_rep02	3.80101	2.56533
chr6	141171168	141171178	SF3B1_K562_rep02	3.80101	2.56533
chr6	141168548	141168555	ZC3H11A_K562_rep01	4.11741	2.5636
chr6	141168555	141168589	ZC3H11A_K562_rep01	4.11741	2.5636
chr6	141168548	141168555	ZC3H11A_K562_rep01	4.11741	2.5636
chr6	141168555	141168589	ZC3H11A_K562_rep01	4.11741	2.5636
chr6	141173959	141174007	ZC3H11A_HepG2_rep02	2.7824	2.49
chr6	141173959	141174007	ZC3H11A_HepG2_rep02	2.7824	2.49
chr6	141171178	141171210	SF3B1_K562_rep02	3.43844	2.32151
chr6	141171178	141171210	SF3B1_K562_rep02	3.43844	2.32151
chr6	141171438	141171501	HNRNPL_HepG2_rep02	1.99065	2.31667
chr6	141171438	141171501	HNRNPL_HepG2_rep02	1.99065	2.31667
chr6	141171653	141171685	TBRG4_HepG2_rep01	3.32586	2.30566
chr6	141171653	141171685	TBRG4_HepG2_rep01	3.32586	2.30566
chr6	141170121	141170170	HNRNPC_HepG2_rep01	1.87732	2.25482
chr6	141170121	141170170	HNRNPC_HepG2_rep01	1.87732	2.25482
chr6	141173598	141173779	SUGP2_HepG2_rep01	1.10572	2.24604
chr6	141173598	141173779	SUGP2_HepG2_rep01	1.10572	2.24604
chr6	141172880	141172949	HNRNPL_HepG2_rep01	1.65304	2.23042
chr6	141172880	141172949	HNRNPL_HepG2_rep01	1.65304	2.23042
chr6	141173115	141173164	HNRNPL_HepG2_rep01	1.95789	2.21754
chr6	141173115	141173164	HNRNPL_HepG2_rep01	1.95789	2.21754
chr6	141171175	141171255	QKI_HepG2_rep02	2.10681	2.19488
chr6	141171175	141171255	QKI_HepG2_rep02	2.10681	2.19488
chr6	141173337	141173367	QKI_HepG2_rep02	2.7283	2.18778
chr6	141173337	141173367	QKI_HepG2_rep02	2.7283	2.18778
chr6	141167598	141167645	WDR43_K562_rep02	4.01175	2.18343
chr6	141167598	141167645	WDR43_K562_rep02	4.01175	2.18343
chr6	141173709	141173771	DDX42_K562_rep01	3.75958	2.17854
chr6	141173709	141173771	DDX42_K562_rep01	3.75958	2.17854
chr6	141167625	141167775	UCHL5_K562_rep02	2.0206	2.1657
chr6	141167625	141167775	UCHL5_K562_rep02	2.0206	2.1657
chr6	141170116	141170168	HNRNPC_HepG2_rep02	1.90464	2.13818
chr6	141170116	141170168	HNRNPC_HepG2_rep02	1.90464	2.13818
chr6	141170210	141170303	KHSRP_K562_rep01	2.44161	2.10934
chr6	141170210	141170303	KHSRP_K562_rep01	2.44161	2.10934
chr6	141172740	141172795	PTBP1_K562_rep02	3.42474	2.10762
chr6	141172740	141172795	PTBP1_K562_rep02	3.42474	2.10762
chr6	141173625	141173805	HNRNPM_HepG2_rep01	1.63556	2.07181
chr6	141173625	141173805	HNRNPM_HepG2_rep01	1.63556	2.07181
chr6	141169013	141169067	HNRNPL_HepG2_rep02	1.55359	2.05887
chr6	141169013	141169067	HNRNPL_HepG2_rep02	1.55359	2.05887
chr6	141167398	141167499	SF3B4_K562_rep02	2.38403	2.01257
chr6	141167398	141167499	SF3B4_K562_rep02	2.38403	2.01257
chr6	141167133	141167166	UCHL5_K562_rep01	3.32103	1.98736
chr6	141167133	141167166	UCHL5_K562_rep01	3.32103	1.98736
chr6	141167842	141167871	DHX30_K562_rep02	4.1598	1.97494
chr6	141167842	141167871	DHX30_K562_rep02	4.1598	1.97494
chr6	141173683	141173760	MATR3_HepG2_rep01	1.90479	1.89592
chr6	141173683	141173760	MATR3_HepG2_rep01	1.90479	1.89592
chr6	141170198	141170285	KHSRP_K562_rep02	2.39131	1.88803
chr6	141170198	141170285	KHSRP_K562_rep02	2.39131	1.88803
chr6	141174016	141174056	U2AF2_HepG2_rep01	1.55278	1.85617
chr6	141173885	141173930	KHSRP_HepG2_rep02	2.45138	1.84669
chr6	141173885	141173930	KHSRP_HepG2_rep02	2.45138	1.84669
chr6	141169242	141169288	SAFB_HepG2_rep01	2.96449	1.78146
chr6	141169242	141169288	SAFB_HepG2_rep01	2.96449	1.78146
chr6	141169446	141169480	PUM2_K562_rep01	3.13041	1.7705
chr6	141169446	141169480	PUM2_K562_rep01	3.13041	1.7705
chr6	141168010	141168035	GEMIN5_K562_rep02	3.35478	1.7669
chr6	141168010	141168035	GEMIN5_K562_rep02	3.35478	1.7669
chr6	141167403	141167451	HNRNPC_HepG2_rep01	1.67379	1.76423
chr6	141167403	141167451	HNRNPC_HepG2_rep01	1.67379	1.76423
chr6	141173136	141173220	KHSRP_HepG2_rep01	1.53278	1.76075
chr6	141173136	141173220	KHSRP_HepG2_rep01	1.53278	1.76075
chr6	141173553	141173631	SUGP2_HepG2_rep02	1.31685	1.6689
chr6	141173553	141173631	SUGP2_HepG2_rep02	1.31685	1.6689
chr6	141173149	141173237	SUGP2_HepG2_rep02	1.37986	1.65066
chr6	141173149	141173237	SUGP2_HepG2_rep02	1.37986	1.65066
chr6	141169194	141169210	HNRNPL_HepG2_rep02	3.02307	1.6367
chr6	141169194	141169210	HNRNPL_HepG2_rep02	3.02307	1.6367
chr6	141168506	141168560	QKI_HepG2_rep02	2.40637	1.62341
chr6	141168506	141168560	QKI_HepG2_rep02	2.40637	1.62341
chr6	141167389	141167448	HNRNPC_HepG2_rep02	1.72776	1.58897
chr6	141167389	141167448	HNRNPC_HepG2_rep02	1.72776	1.58897
chr6	141173884	141173943	TIA1_HepG2_rep02	2.75964	1.5689
chr6	141173884	141173943	TIA1_HepG2_rep02	2.75964	1.5689
chr6	141171684	141171737	HNRNPK_HepG2_rep02	1.92641	1.56437
chr6	141171684	141171737	HNRNPK_HepG2_rep02	1.92641	1.56437
chr6	141173347	141173367	QKI_HepG2_rep01	2.86131	1.54322
chr6	141173347	141173367	QKI_HepG2_rep01	2.86131	1.54322
chr6	141171317	141171350	HNRNPL_HepG2_rep02	1.6605	1.45951
chr6	141171317	141171350	HNRNPL_HepG2_rep02	1.6605	1.45951
chr6	141167405	141167450	GPKOW_K562_rep02	3.40646	1.44604
chr6	141167405	141167450	GPKOW_K562_rep02	3.40646	1.44604
chr6	141173284	141173315	QKI_K562_rep01	3.4031	1.44384
chr6	141173284	141173315	QKI_K562_rep01	3.4031	1.44384
chr6	141173606	141173694	TAF15_HepG2_rep02	1.87794	1.43757
chr6	141173606	141173694	TAF15_HepG2_rep02	1.87794	1.43757
chr6	141173679	141173771	SUGP2_HepG2_rep02	1.16485	1.43471
chr6	141173679	141173771	SUGP2_HepG2_rep02	1.16485	1.43471
chr6	141167385	141167442	EFTUD2_K562_rep02	1.81973	1.43466
chr6	141167385	141167442	EFTUD2_K562_rep02	1.81973	1.43466
chr6	141167136	141167159	ZC3H11A_K562_rep01	3.38045	1.42899
chr6	141167136	141167159	ZC3H11A_K562_rep01	3.38045	1.42899
chr6	141169241	141169269	HNRNPL_HepG2_rep01	2.18028	1.426
chr6	141169241	141169269	HNRNPL_HepG2_rep01	2.18028	1.426
chr6	141173953	141173984	XRCC6_K562_rep02	2.58323	1.42347
chr6	141173953	141173984	XRCC6_K562_rep02	2.58323	1.42347
chr6	141171171	141171244	HNRNPL_HepG2_rep02	1.17507	1.41324
chr6	141171171	141171244	HNRNPL_HepG2_rep02	1.17507	1.41324
chr6	141171274	141171284	HNRNPL_HepG2_rep02	2.85315	1.38457
chr6	141171274	141171284	HNRNPL_HepG2_rep02	2.85315	1.38457
chr6	141172730	141172799	MATR3_HepG2_rep01	1.58286	1.3753
chr6	141172730	141172799	MATR3_HepG2_rep01	1.58286	1.3753
chr6	141173720	141173776	TIAL1_HepG2_rep02	2.79016	1.36115
chr6	141173720	141173776	TIAL1_HepG2_rep02	2.79016	1.36115
chr6	141173116	141173154	QKI_HepG2_rep01	1.80686	1.35856
chr6	141173116	141173154	QKI_HepG2_rep01	1.80686	1.35856
chr6	141172786	141172805	QKI_HepG2_rep01	2.69138	1.31187
chr6	141172786	141172805	QKI_HepG2_rep01	2.69138	1.31187
chr6	141170403	141170452	HNRNPC_HepG2_rep02	1.46724	1.30748
chr6	141170403	141170452	HNRNPC_HepG2_rep02	1.46724	1.30748
chr6	141169445	141169485	DDX6_HepG2_rep01	3.1599	1.28803
chr6	141169445	141169485	DDX6_HepG2_rep01	3.1599	1.28803
chr6	141173591	141173628	SDAD1_HepG2_rep02	2.65859	1.28458
chr6	141173591	141173628	SDAD1_HepG2_rep02	2.65859	1.28458
chr6	141171938	141171980	CDC40_HepG2_rep01	1.79681	1.27629
chr6	141171938	141171980	CDC40_HepG2_rep01	1.79681	1.27629
chr6	141170603	141170639	RBM22_HepG2_rep01	3.13189	1.27062
chr6	141170603	141170639	RBM22_HepG2_rep01	3.13189	1.27062
chr6	141171149	141171192	HNRNPC_HepG2_rep01	2.6294	1.26242
chr6	141171149	141171192	HNRNPC_HepG2_rep01	2.6294	1.26242
chr6	141171197	141171250	HNRNPL_HepG2_rep01	1.10989	1.25136
chr6	141171197	141171250	HNRNPL_HepG2_rep01	1.10989	1.25136
chr6	141170308	141170329	RBM15_HepG2_rep02	3.07323	1.23451
chr6	141170308	141170329	RBM15_HepG2_rep02	3.07323	1.23451
chr6	141167259	141167320	YBX3_K562_rep02	1.40496	1.23301
chr6	141167259	141167320	YBX3_K562_rep02	1.40496	1.23301
chr6	141167649	141167709	EIF3H_HepG2_rep02	1.94425	1.22403
chr6	141167649	141167709	EIF3H_HepG2_rep02	1.94425	1.22403
chr6	141172983	141173031	HNRNPL_HepG2_rep01	1.31153	1.2034
chr6	141172983	141173031	HNRNPL_HepG2_rep01	1.31153	1.2034
chr6	141169787	141169858	HNRNPU_HepG2_rep02	2.56874	1.19901
chr6	141169787	141169858	HNRNPU_HepG2_rep02	2.56874	1.19901
chr6	141168737	141168813	HNRNPUL1_HepG2_rep01	1.62803	1.1967
chr6	141168737	141168813	HNRNPUL1_HepG2_rep01	1.62803	1.1967
chr6	141167126	141167156	HNRNPC_HepG2_rep02	2.52613	1.18344
chr6	141167126	141167156	HNRNPC_HepG2_rep02	2.52613	1.18344
chr6	141167975	141168022	U2AF2_HepG2_rep02	1.52797	1.17487
chr6	141167975	141168022	U2AF2_HepG2_rep02	1.52797	1.17487
chr6	141168004	141168093	KHSRP_K562_rep01	2.50872	1.15468
chr6	141168004	141168093	KHSRP_K562_rep01	2.50872	1.15468
chr6	141167565	141167631	UCHL5_K562_rep01	2.09864	1.14325
chr6	141167565	141167631	UCHL5_K562_rep01	2.09864	1.14325
chr6	141173952	141173986	BUD13_HepG2_rep02	1.83009	1.12741
chr6	141173952	141173986	BUD13_HepG2_rep02	1.83009	1.12741
chr6	141173130	141173198	HNRNPL_K562_rep02	2.49218	1.12735
chr6	141173130	141173198	HNRNPL_K562_rep02	2.49218	1.12735
chr6	141173739	141173778	MATR3_HepG2_rep02	2.05177	1.11882
chr6	141173739	141173778	MATR3_HepG2_rep02	2.05177	1.11882
chr6	141173120	141173146	XPO5_HepG2_rep01	2.81173	1.07978
chr6	141173120	141173146	XPO5_HepG2_rep01	2.81173	1.07978
chr6	141168798	141168827	FUBP3_HepG2_rep02	2.80502	1.07594
chr6	141168798	141168827	FUBP3_HepG2_rep02	2.80502	1.07594
chr6	141170116	141170151	EIF3H_HepG2_rep02	2.79225	1.06867
chr6	141170116	141170151	EIF3H_HepG2_rep02	2.79225	1.06867
chr6	141171906	141171962	QKI_HepG2_rep01	1.36945	1.05326
chr6	141171906	141171962	QKI_HepG2_rep01	1.36945	1.05326
chr6	141167893	141167928	QKI_HepG2_rep02	2.7283	1.04142
chr6	141167893	141167928	QKI_HepG2_rep02	2.7283	1.04142
chr6	141172319	141172375	SAFB_HepG2_rep01	1.5601	1.01423
chr6	141172319	141172375	SAFB_HepG2_rep01	1.5601	1.01423
chr6	141170126	141170177	DROSHA_K562_rep02	1.7983	1.00735
chr6	141170126	141170177	DROSHA_K562_rep02	1.7983	1.00735
chr6	141173721	141173790	FUS_HepG2_rep02	1.33975	1.00199
chr6	141173721	141173790	FUS_HepG2_rep02	1.33975	1.00199
chr6	141172866	141172919	HNRNPC_HepG2_rep01	1.27325	0.999513
chr6	141172866	141172919	HNRNPC_HepG2_rep01	1.27325	0.999513
chr6	141167619	141167674	RBM15_K562_rep02	2.5551	0.997383
chr6	141167619	141167674	RBM15_K562_rep02	2.5551	0.997383
chr6	141168243	141168309	HNRNPC_HepG2_rep01	1.32984	0.994968
chr6	141168243	141168309	HNRNPC_HepG2_rep01	1.32984	0.994968
chr6	141172300	141172342	HNRNPU_HepG2_rep02	2.41674	0.988518
chr6	141172300	141172342	HNRNPU_HepG2_rep02	2.41674	0.988518
chr6	141172303	141172372	HNRNPU_HepG2_rep01	2.39177	0.983724
chr6	141172303	141172372	HNRNPU_HepG2_rep01	2.39177	0.983724
chr6	141173113	141173148	ZC3H11A_HepG2_rep02	1.65687	0.981033
chr6	141173113	141173148	ZC3H11A_HepG2_rep02	1.65687	0.981033
chr6	141173763	141173797	SF3A3_HepG2_rep01	1.55901	0.980578
chr6	141173763	141173797	SF3A3_HepG2_rep01	1.55901	0.980578
chr6	141171603	141171715	HNRNPL_HepG2_rep01	0.679591	0.980302
chr6	141171603	141171715	HNRNPL_HepG2_rep01	0.679591	0.980302
chr6	141170336	141170386	FASTKD2_HepG2_rep02	2.16466	0.974447
chr6	141170336	141170386	FASTKD2_HepG2_rep02	2.16466	0.974447
chr6	141173959	141173978	ZC3H11A_HepG2_rep01	1.96914	0.960285
chr6	141173959	141173978	ZC3H11A_HepG2_rep01	1.96914	0.960285
chr6	141173946	141173967	ZRANB2_K562_rep02	2.59622	0.960276
chr6	141173946	141173967	ZRANB2_K562_rep02	2.59622	0.960276
chr6	141173688	141173736	HNRNPUL1_HepG2_rep01	1.36499	0.95597
chr6	141173688	141173736	HNRNPUL1_HepG2_rep01	1.36499	0.95597
chr6	141173650	141173802	DROSHA_HepG2_rep01	1.47878	0.946017
chr6	141173650	141173802	DROSHA_HepG2_rep01	1.47878	0.946017
chr6	141171947	141171957	HNRNPL_HepG2_rep02	1.85315	0.943398
chr6	141171947	141171957	HNRNPL_HepG2_rep02	1.85315	0.943398
chr6	141172566	141172612	HNRNPC_HepG2_rep01	1.50386	0.938626
chr6	141172566	141172612	HNRNPC_HepG2_rep01	1.50386	0.938626
chr6	141171665	141171742	HNRNPK_HepG2_rep01	1.53572	0.936875
chr6	141171665	141171742	HNRNPK_HepG2_rep01	1.53572	0.936875
chr6	141167504	141167542	LARP4_K562_rep02	2.08414	0.936266
chr6	141167504	141167542	LARP4_K562_rep02	2.08414	0.936266
chr6	141173644	141173713	ZC3H11A_HepG2_rep02	1.19744	0.934159
chr6	141173644	141173713	ZC3H11A_HepG2_rep02	1.19744	0.934159
chr6	141173709	141173751	SAFB_HepG2_rep01	1.30552	0.912663
chr6	141173709	141173751	SAFB_HepG2_rep01	1.30552	0.912663
chr6	141173732	141173774	PRPF8_K562_rep01	1.90344	0.904414
chr6	141173732	141173774	PRPF8_K562_rep01	1.90344	0.904414
chr6	141167209	141167229	DDX3X_K562_rep01	2.48551	0.901842
chr6	141167209	141167229	DDX3X_K562_rep01	2.48551	0.901842
chr6	141167898	141167930	HNRNPL_HepG2_rep02	1.31258	0.901106
chr6	141167898	141167930	HNRNPL_HepG2_rep02	1.31258	0.901106
chr6	141167959	141168016	U2AF2_HepG2_rep01	1.25732	0.897326
chr6	141167959	141168016	U2AF2_HepG2_rep01	1.25732	0.897326
chr6	141170407	141170453	HNRNPC_HepG2_rep01	1.16545	0.893435
chr6	141170407	141170453	HNRNPC_HepG2_rep01	1.16545	0.893435
chr6	141167676	141167706	TROVE2_K562_rep01	2.46373	0.890585
chr6	141167676	141167706	TROVE2_K562_rep01	2.46373	0.890585
chr6	141173895	141173940	TIA1_HepG2_rep01	2.34198	0.878714
chr6	141173895	141173940	TIA1_HepG2_rep01	2.34198	0.878714
chr6	141173878	141173934	SFPQ_HepG2_rep02	1.65128	0.868129
chr6	141173878	141173934	SFPQ_HepG2_rep02	1.65128	0.868129
chr6	141170076	141170097	SUPV3L1_HepG2_rep01	1.95986	0.867868
chr6	141173345	141173368	SUPV3L1_HepG2_rep01	1.95986	0.867868
chr6	141170076	141170097	SUPV3L1_HepG2_rep01	1.95986	0.867868
chr6	141173345	141173368	SUPV3L1_HepG2_rep01	1.95986	0.867868
chr6	141174019	141174057	U2AF1_K562_rep01	2.30883	0.863448
chr6	141171764	141171775	QKI_HepG2_rep01	2.27634	0.854179
chr6	141171764	141171775	QKI_HepG2_rep01	2.27634	0.854179
chr6	141167398	141167450	BUD13_K562_rep02	1.57589	0.835588
chr6	141167398	141167450	BUD13_K562_rep02	1.57589	0.835588
chr6	141168771	141168816	ZC3H11A_HepG2_rep01	1.5541	0.834838
chr6	141168771	141168816	ZC3H11A_HepG2_rep01	1.5541	0.834838
chr6	141173852	141173892	SFPQ_HepG2_rep01	1.54098	0.833993
chr6	141173852	141173892	SFPQ_HepG2_rep01	1.54098	0.833993
chr6	141173125	141173134	QKI_HepG2_rep02	1.7283	0.830232
chr6	141173125	141173134	QKI_HepG2_rep02	1.7283	0.830232
chr6	141167125	141167155	TIA1_K562_rep01	2.20068	0.829723
chr6	141167125	141167155	TIA1_K562_rep01	2.20068	0.829723
chr6	141173464	141173503	FUS_HepG2_rep02	2.33975	0.822711
chr6	141173464	141173503	FUS_HepG2_rep02	2.33975	0.822711
chr6	141167712	141167720	HNRNPL_HepG2_rep02	1.43811	0.817477
chr6	141167712	141167720	HNRNPL_HepG2_rep02	1.43811	0.817477
chr6	141167412	141167414	TBRG4_K562_rep02	2.31202	0.814415
chr6	141167414	141167443	TBRG4_K562_rep02	2.31202	0.814415
chr6	141167969	141168010	TBRG4_K562_rep02	2.31202	0.814415
chr6	141167412	141167414	TBRG4_K562_rep02	2.31202	0.814415
chr6	141167414	141167443	TBRG4_K562_rep02	2.31202	0.814415
chr6	141167969	141168010	TBRG4_K562_rep02	2.31202	0.814415
chr6	141167732	141167756	XRCC6_HepG2_rep02	2.30487	0.81092
chr6	141167732	141167756	XRCC6_HepG2_rep02	2.30487	0.81092
chr6	141171445	141171475	HNRNPL_HepG2_rep01	1.18028	0.808591
chr6	141171445	141171475	HNRNPL_HepG2_rep01	1.18028	0.808591
chr6	141167125	141167153	TIA1_K562_rep02	2.21703	0.805296
chr6	141167125	141167153	TIA1_K562_rep02	2.21703	0.805296
chr6	141173894	141173928	AQR_K562_rep01	2.28017	0.798924
chr6	141173894	141173928	AQR_K562_rep01	2.28017	0.798924
chr6	141169962	141170014	TAF15_HepG2_rep02	2.1828	0.797862
chr6	141169962	141170014	TAF15_HepG2_rep02	2.1828	0.797862
chr6	141168816	141168856	HNRNPC_HepG2_rep01	1.29236	0.797507
chr6	141168816	141168856	HNRNPC_HepG2_rep01	1.29236	0.797507
chr6	141170989	141171014	XPO5_HepG2_rep01	1.81173	0.789846
chr6	141170989	141171014	XPO5_HepG2_rep01	1.81173	0.789846
chr6	141167133	141167160	DDX6_K562_rep02	2.55665	0.781297
chr6	141167133	141167160	DDX6_K562_rep02	2.55665	0.781297
chr6	141169000	141169063	HNRNPC_HepG2_rep02	1.1302	0.781228
chr6	141169000	141169063	HNRNPC_HepG2_rep02	1.1302	0.781228
chr6	141173672	141173728	FUS_HepG2_rep01	1.16899	0.780833
chr6	141173672	141173728	FUS_HepG2_rep01	1.16899	0.780833
chr6	141170099	141170165	KHSRP_HepG2_rep01	1.1031	0.777076
chr6	141170099	141170165	KHSRP_HepG2_rep01	1.1031	0.777076
chr6	141167890	141167931	RBM22_HepG2_rep02	2.50308	0.776599
chr6	141167890	141167931	RBM22_HepG2_rep02	2.50308	0.776599
chr6	141172870	141172903	FUBP3_HepG2_rep01	2.49018	0.7752
chr6	141173609	141173642	FUBP3_HepG2_rep01	2.49018	0.7752
chr6	141172870	141172903	FUBP3_HepG2_rep01	2.49018	0.7752
chr6	141173609	141173642	FUBP3_HepG2_rep01	2.49018	0.7752
chr6	141173707	141173748	DROSHA_HepG2_rep02	2.19459	0.771575
chr6	141173707	141173748	DROSHA_HepG2_rep02	2.19459	0.771575
chr6	141172572	141172605	SF3A3_HepG2_rep01	1.4659	0.76428
chr6	141172572	141172605	SF3A3_HepG2_rep01	1.4659	0.76428
chr6	141167616	141167658	RBM15_K562_rep01	2.3952	0.761811
chr6	141167616	141167658	RBM15_K562_rep01	2.3952	0.761811
chr6	141173970	141173977	ZNF622_K562_rep01	2.37342	0.758008
chr6	141173970	141173977	ZNF622_K562_rep01	2.37342	0.758008
chr6	141173956	141174002	RBM22_HepG2_rep02	1.50308	0.755509
chr6	141173956	141174002	RBM22_HepG2_rep02	1.50308	0.755509
chr6	141167348	141167384	SRSF7_HepG2_rep02	2.34523	0.752703
chr6	141167348	141167384	SRSF7_HepG2_rep02	2.34523	0.752703
chr6	141170498	141170520	SAFB_HepG2_rep01	2.0576	0.746879
chr6	141170498	141170520	SAFB_HepG2_rep01	2.0576	0.746879
chr6	141173743	141173771	ZC3H11A_HepG2_rep01	1.29107	0.744934
chr6	141173743	141173771	ZC3H11A_HepG2_rep01	1.29107	0.744934
chr6	141173701	141173737	XRCC6_K562_rep01	1.72221	0.744584
chr6	141173701	141173737	XRCC6_K562_rep01	1.72221	0.744584
chr6	141173683	141173710	SFPQ_HepG2_rep01	1.76337	0.744379
chr6	141173683	141173710	SFPQ_HepG2_rep01	1.76337	0.744379
chr6	141172476	141172510	HNRNPL_HepG2_rep02	1.07554	0.743788
chr6	141172991	141173030	HNRNPL_HepG2_rep02	1.07554	0.743788
chr6	141172476	141172510	HNRNPL_HepG2_rep02	1.07554	0.743788
chr6	141172991	141173030	HNRNPL_HepG2_rep02	1.07554	0.743788
chr6	141167676	141167723	XPO5_HepG2_rep02	1.16392	0.7395
chr6	141167676	141167723	XPO5_HepG2_rep02	1.16392	0.7395
chr6	141171609	141171633	QKI_HepG2_rep02	1.40637	0.730171
chr6	141171818	141171832	QKI_HepG2_rep02	1.40637	0.730171
chr6	141171609	141171633	QKI_HepG2_rep02	1.40637	0.730171
chr6	141171818	141171832	QKI_HepG2_rep02	1.40637	0.730171
chr6	141173664	141173776	TAF15_HepG2_rep01	0.865585	0.720401
chr6	141173664	141173776	TAF15_HepG2_rep01	0.865585	0.720401
chr6	141172320	141172357	EIF3H_HepG2_rep01	1.91037	0.717103
chr6	141172320	141172357	EIF3H_HepG2_rep01	1.91037	0.717103
chr6	141169444	141169481	DDX3X_K562_rep01	1.90055	0.715816
chr6	141169444	141169481	DDX3X_K562_rep01	1.90055	0.715816
chr6	141170919	141170956	WDR43_HepG2_rep01	1.83307	0.705377
chr6	141170919	141170956	WDR43_HepG2_rep01	1.83307	0.705377
chr6	141171230	141171262	QKI_HepG2_rep01	1.15081	0.701506
chr6	141171230	141171262	QKI_HepG2_rep01	1.15081	0.701506
chr6	141173675	141173764	PTBP1_HepG2_rep02	1.20974	0.696588
chr6	141173675	141173764	PTBP1_HepG2_rep02	1.20974	0.696588
chr6	141174019	141174056	U2AF2_K562_rep02	1.52172	0.695547
chr6	141173690	141173753	FUBP3_HepG2_rep02	1.22006	0.692433
chr6	141173690	141173753	FUBP3_HepG2_rep02	1.22006	0.692433
chr6	141173972	141174014	KHSRP_HepG2_rep02	1.12945	0.687019
chr6	141173972	141174014	KHSRP_HepG2_rep02	1.12945	0.687019
chr6	141173951	141173976	HLTF_HepG2_rep01	1.16987	0.684681
chr6	141173951	141173976	HLTF_HepG2_rep01	1.16987	0.684681
chr6	141173958	141174018	SUGP2_HepG2_rep01	0.810268	0.679646
chr6	141173958	141174018	SUGP2_HepG2_rep01	0.810268	0.679646
chr6	141172331	141172385	SAFB_HepG2_rep02	1.3103	0.666411
chr6	141172331	141172385	SAFB_HepG2_rep02	1.3103	0.666411
chr6	141173694	141173806	TAF15_HepG2_rep02	0.834873	0.66346
chr6	141173694	141173806	TAF15_HepG2_rep02	0.834873	0.66346
chr6	141173739	141173790	TIA1_K562_rep02	1.5796	0.660806
chr6	141173739	141173790	TIA1_K562_rep02	1.5796	0.660806
chr6	141167405	141167448	SAFB_HepG2_rep01	0.932066	0.658763
chr6	141167405	141167448	SAFB_HepG2_rep01	0.932066	0.658763
chr6	141167898	141167943	RBFOX2_K562_rep02	2.24769	0.658209
chr6	141167898	141167943	RBFOX2_K562_rep02	2.24769	0.658209
chr6	141167587	141167675	RBM22_HepG2_rep02	1.01766	0.649035
chr6	141167587	141167675	RBM22_HepG2_rep02	1.01766	0.649035
chr6	141173852	141173985	HNRNPA1_HepG2_rep01	1.34975	0.648502
chr6	141173852	141173985	HNRNPA1_HepG2_rep01	1.34975	0.648502
chr6	141172739	141172773	DGCR8_HepG2_rep02	2.11997	0.646651
chr6	141172739	141172773	DGCR8_HepG2_rep02	2.11997	0.646651
chr6	141173898	141173920	TAF15_HepG2_rep01	1.45055	0.646237
chr6	141173898	141173920	TAF15_HepG2_rep01	1.45055	0.646237
chr6	141173958	141174000	SRSF1_K562_rep02	1.54959	0.636359
chr6	141173958	141174000	SRSF1_K562_rep02	1.54959	0.636359
chr6	141172741	141172776	U2AF1_K562_rep01	2.0458	0.635427
chr6	141172741	141172776	U2AF1_K562_rep01	2.0458	0.635427
chr6	141167558	141167617	GRWD1_HepG2_rep01	1.06111	0.630498
chr6	141167558	141167617	GRWD1_HepG2_rep01	1.06111	0.630498
chr6	141173167	141173208	FUBP3_HepG2_rep01	1.49018	0.616945
chr6	141173167	141173208	FUBP3_HepG2_rep01	1.49018	0.616945
chr6	141173156	141173205	TIA1_K562_rep01	1.93765	0.613936
chr6	141173156	141173205	TIA1_K562_rep01	1.93765	0.613936
chr6	141172302	141172361	HNRNPA1_HepG2_rep01	1.88027	0.61218
chr6	141172302	141172361	HNRNPA1_HepG2_rep01	1.88027	0.61218
chr6	141173569	141173668	POLR2G_HepG2_rep02	1.12174	0.599829
chr6	141173569	141173668	POLR2G_HepG2_rep02	1.12174	0.599829
chr6	141171894	141171962	ZC3H11A_HepG2_rep01	0.799214	0.599376
chr6	141171894	141171962	ZC3H11A_HepG2_rep01	0.799214	0.599376
chr6	141167554	141167585	BCLAF1_HepG2_rep02	1.66919	0.597686
chr6	141167554	141167585	BCLAF1_HepG2_rep02	1.66919	0.597686
chr6	141167878	141167923	NKRF_HepG2_rep01	1.66657	0.597516
chr6	141167878	141167923	NKRF_HepG2_rep01	1.66657	0.597516
chr6	141169837	141169896	LARP4_HepG2_rep01	1.09506	0.59541
chr6	141169837	141169896	LARP4_HepG2_rep01	1.09506	0.59541
chr6	141168282	141168330	SND1_K562_rep02	1.61732	0.593463
chr6	141168282	141168330	SND1_K562_rep02	1.61732	0.593463
chr6	141167386	141167425	XRN2_K562_rep01	1.60722	0.592434
chr6	141167386	141167425	XRN2_K562_rep01	1.60722	0.592434
chr6	141173295	141173329	ZC3H11A_HepG2_rep01	1.13906	0.573156
chr6	141173295	141173329	ZC3H11A_HepG2_rep01	1.13906	0.573156
chr6	141169380	141169414	HNRNPU_HepG2_rep02	1.83178	0.569242
chr6	141169380	141169414	HNRNPU_HepG2_rep02	1.83178	0.569242
chr6	141169397	141169422	HNRNPL_HepG2_rep01	1.10989	0.567669
chr6	141169397	141169422	HNRNPL_HepG2_rep01	1.10989	0.567669
chr6	141172299	141172360	ZC3H11A_HepG2_rep01	0.734674	0.565942
chr6	141172299	141172360	ZC3H11A_HepG2_rep01	0.734674	0.565942
chr6	141167488	141167569	SRSF1_K562_rep02	2.03501	0.565191
chr6	141167488	141167569	SRSF1_K562_rep02	2.03501	0.565191
chr6	141170105	141170168	U2AF2_HepG2_rep01	0.682413	0.560446
chr6	141170105	141170168	U2AF2_HepG2_rep01	0.682413	0.560446
chr6	141167498	141167529	KHSRP_K562_rep01	1.85664	0.554623
chr6	141167498	141167529	KHSRP_K562_rep01	1.85664	0.554623
chr6	141169072	141169102	HNRNPL_HepG2_rep01	0.957892	0.553028
chr6	141169072	141169102	HNRNPL_HepG2_rep01	0.957892	0.553028
chr6	141168248	141168300	HNRNPC_HepG2_rep02	1.2042	0.547941
chr6	141168248	141168300	HNRNPC_HepG2_rep02	1.2042	0.547941
chr6	141169801	141169880	HNRNPC_HepG2_rep02	0.789164	0.547677
chr6	141169801	141169880	HNRNPC_HepG2_rep02	0.789164	0.547677
chr6	141167884	141167933	UCHL5_K562_rep01	1.25064	0.541915
chr6	141167884	141167933	UCHL5_K562_rep01	1.25064	0.541915
chr6	141167709	141167750	HNRNPL_K562_rep02	1.90722	0.54053
chr6	141167709	141167750	HNRNPL_K562_rep02	1.90722	0.54053
chr6	141170025	141170059	RBM5_HepG2_rep01	1.54144	0.538336
chr6	141170025	141170059	RBM5_HepG2_rep01	1.54144	0.538336
chr6	141173877	141173935	KHSRP_K562_rep01	1.16477	0.535172
chr6	141173877	141173935	KHSRP_K562_rep01	1.16477	0.535172
chr6	141173704	141173786	SAFB_HepG2_rep02	0.895258	0.529531
chr6	141173704	141173786	SAFB_HepG2_rep02	0.895258	0.529531
chr6	141169851	141169883	DDX52_HepG2_rep02	1.16928	0.52589
chr6	141169851	141169883	DDX52_HepG2_rep02	1.16928	0.52589
chr6	141167406	141167439	U2AF2_HepG2_rep01	0.897426	0.523966
chr6	141167406	141167439	U2AF2_HepG2_rep01	0.897426	0.523966
chr6	141168504	141168555	U2AF2_HepG2_rep01	0.967816	0.522821
chr6	141168504	141168555	U2AF2_HepG2_rep01	0.967816	0.522821
chr6	141169079	141169095	QKI_HepG2_rep02	1.14334	0.520047
chr6	141169850	141169881	QKI_HepG2_rep02	1.14334	0.520047
chr6	141169079	141169095	QKI_HepG2_rep02	1.14334	0.520047
chr6	141169850	141169881	QKI_HepG2_rep02	1.14334	0.520047
chr6	141173671	141173784	HNRNPUL1_HepG2_rep02	0.676433	0.517084
chr6	141173671	141173784	HNRNPUL1_HepG2_rep02	0.676433	0.517084
chr6	141173737	141173754	U2AF2_HepG2_rep01	1.11982	0.514473
chr6	141173737	141173754	U2AF2_HepG2_rep01	1.11982	0.514473
chr6	141170514	141170534	DDX59_HepG2_rep01	2.2266	0.513629
chr6	141170514	141170534	DDX59_HepG2_rep01	2.2266	0.513629
chr6	141167615	141167674	SRSF9_HepG2_rep02	1.30983	0.513256
chr6	141167615	141167674	SRSF9_HepG2_rep02	1.30983	0.513256
chr6	141169860	141169895	HNRNPL_HepG2_rep01	0.957892	0.507786
chr6	141169860	141169895	HNRNPL_HepG2_rep01	0.957892	0.507786
chr6	141168980	141168993	QKI_HepG2_rep01	1.27634	0.506955
chr6	141168980	141168993	QKI_HepG2_rep01	1.27634	0.506955
chr6	141167390	141167441	PRPF8_K562_rep02	1.28046	0.500924
chr6	141167390	141167441	PRPF8_K562_rep02	1.28046	0.500924
chr6	141172317	141172370	HNRNPA1_HepG2_rep02	1.78742	0.493033
chr6	141172317	141172370	HNRNPA1_HepG2_rep02	1.78742	0.493033
chr6	141168315	141168358	DHX30_HepG2_rep01	0.964193	0.488635
chr6	141168315	141168358	DHX30_HepG2_rep01	0.964193	0.488635
chr6	141170350	141170387	ZNF800_HepG2_rep01	1.94698	0.487824
chr6	141170350	141170387	ZNF800_HepG2_rep01	1.94698	0.487824
chr6	141167686	141167694	NCBP2_K562_rep02	1.89768	0.480994
chr6	141167694	141167720	NCBP2_K562_rep02	1.89768	0.480994
chr6	141167686	141167694	NCBP2_K562_rep02	1.89768	0.480994
chr6	141167694	141167720	NCBP2_K562_rep02	1.89768	0.480994
chr6	141167616	141167659	SAFB_HepG2_rep01	0.864952	0.479591
chr6	141167616	141167659	SAFB_HepG2_rep01	0.864952	0.479591
chr6	141168860	141168892	SND1_K562_rep02	1.88035	0.478452
chr6	141168860	141168892	SND1_K562_rep02	1.88035	0.478452
chr6	141167484	141167521	PRPF8_K562_rep02	1.86542	0.476204
chr6	141167484	141167521	PRPF8_K562_rep02	1.86542	0.476204
chr6	141173763	141173844	KHSRP_K562_rep02	0.90588	0.476081
chr6	141173763	141173844	KHSRP_K562_rep02	0.90588	0.476081
chr6	141167618	141167683	HNRNPC_HepG2_rep02	0.789164	0.474217
chr6	141167618	141167683	HNRNPC_HepG2_rep02	0.789164	0.474217
chr6	141167742	141167765	TROVE2_HepG2_rep02	1.67816	0.474152
chr6	141167742	141167765	TROVE2_HepG2_rep02	1.67816	0.474152
chr6	141173735	141173757	HLTF_HepG2_rep01	0.821945	0.47116
chr6	141173735	141173757	HLTF_HepG2_rep01	0.821945	0.47116
chr6	141169246	141169277	TROVE2_HepG2_rep01	0.865542	0.468766
chr6	141169246	141169277	TROVE2_HepG2_rep01	0.865542	0.468766
chr6	141172306	141172353	GTF2F1_HepG2_rep01	1.00612	0.465067
chr6	141172306	141172353	GTF2F1_HepG2_rep01	1.00612	0.465067
chr6	141169516	141169551	DROSHA_HepG2_rep02	1.36452	0.458758
chr6	141169516	141169551	DROSHA_HepG2_rep02	1.36452	0.458758
chr6	141167504	141167529	SFPQ_HepG2_rep02	1.49928	0.457116
chr6	141167504	141167529	SFPQ_HepG2_rep02	1.49928	0.457116
chr6	141170803	141170811	HNRNPL_HepG2_rep02	1.07554	0.455818
chr6	141170803	141170811	HNRNPL_HepG2_rep02	1.07554	0.455818
chr6	141170408	141170440	TROVE2_K562_rep01	1.46373	0.452576
chr6	141170408	141170440	TROVE2_K562_rep01	1.46373	0.452576
chr6	141170241	141170271	HNRNPC_HepG2_rep01	0.877323	0.450941
chr6	141170241	141170271	HNRNPC_HepG2_rep01	0.877323	0.450941
chr6	141173317	141173321	TROVE2_HepG2_rep01	1.4505	0.450796
chr6	141173317	141173321	TROVE2_HepG2_rep01	1.4505	0.450796
chr6	141167425	141167446	GTF2F1_K562_rep01	1.71049	0.450115
chr6	141167425	141167446	GTF2F1_K562_rep01	1.71049	0.450115
chr6	141170769	141170795	POLR2G_HepG2_rep02	1.7067	0.44942
chr6	141170769	141170795	POLR2G_HepG2_rep02	1.7067	0.44942
chr6	141173702	141173784	STAU2_HepG2_rep01	0.809552	0.446505
chr6	141173702	141173784	STAU2_HepG2_rep01	0.809552	0.446505
chr6	141170515	141170532	LARP4_HepG2_rep02	1.68953	0.446243
chr6	141170515	141170532	LARP4_HepG2_rep02	1.68953	0.446243
chr6	141172889	141172930	SFPQ_HepG2_rep02	0.914313	0.440789
chr6	141172889	141172930	SFPQ_HepG2_rep02	0.914313	0.440789
chr6	141173398	141173433	HNRNPK_K562_rep01	1.62096	0.433114
chr6	141173398	141173433	HNRNPK_K562_rep01	1.62096	0.433114
chr6	141167140	141167160	GTF2F1_HepG2_rep02	1.59781	0.428537
chr6	141171253	141171273	GTF2F1_HepG2_rep02	1.59781	0.428537
chr6	141167140	141167160	GTF2F1_HepG2_rep02	1.59781	0.428537
chr6	141171253	141171273	GTF2F1_HepG2_rep02	1.59781	0.428537
chr6	141167830	141167867	XPO5_HepG2_rep01	1.22677	0.42852
chr6	141167830	141167867	XPO5_HepG2_rep01	1.22677	0.42852
chr6	141173276	141173320	SUGP2_HepG2_rep01	0.713407	0.428349
chr6	141173276	141173320	SUGP2_HepG2_rep01	0.713407	0.428349
chr6	141173738	141173765	GRSF1_HepG2_rep01	1.5869	0.426358
chr6	141173738	141173765	GRSF1_HepG2_rep01	1.5869	0.426358
chr6	141169346	141169369	EIF3H_HepG2_rep02	1.20728	0.425706
chr6	141169346	141169369	EIF3H_HepG2_rep02	1.20728	0.425706
chr6	141169291	141169295	RBM5_HepG2_rep01	1.95648	0.42564
chr6	141171065	141171093	RBM5_HepG2_rep01	1.95648	0.42564
chr6	141169291	141169295	RBM5_HepG2_rep01	1.95648	0.42564
chr6	141171065	141171093	RBM5_HepG2_rep01	1.95648	0.42564
chr6	141167131	141167170	RBFOX2_K562_rep02	1.92577	0.425012
chr6	141167131	141167170	RBFOX2_K562_rep02	1.92577	0.425012
chr6	141173417	141173434	MATR3_HepG2_rep01	1.90479	0.424397
chr6	141173417	141173434	MATR3_HepG2_rep01	1.90479	0.424397
chr6	141170571	141170620	RBFOX2_HepG2_rep02	1.85241	0.422209
chr6	141170571	141170620	RBFOX2_HepG2_rep02	1.85241	0.422209
chr6	141173737	141173784	HNRNPM_HepG2_rep02	0.882496	0.421281
chr6	141173737	141173784	HNRNPM_HepG2_rep02	0.882496	0.421281
chr6	141173865	141173884	TIAL1_HepG2_rep02	1.79016	0.418425
chr6	141173865	141173884	TIAL1_HepG2_rep02	1.79016	0.418425
chr6	141170783	141170806	SMNDC1_HepG2_rep01	1.14325	0.415747
chr6	141170783	141170806	SMNDC1_HepG2_rep01	1.14325	0.415747
chr6	141167135	141167162	APOBEC3C_K562_rep02	1.74902	0.415245
chr6	141167135	141167162	APOBEC3C_K562_rep02	1.74902	0.415245
chr6	141172336	141172374	YWHAG_K562_rep01	1.74598	0.41499
chr6	141172336	141172374	YWHAG_K562_rep01	1.74598	0.41499
chr6	141170471	141170520	HNRNPK_HepG2_rep02	1.70402	0.411176
chr6	141173481	141173519	HNRNPK_HepG2_rep02	1.70402	0.411176
chr6	141173925	141173971	HNRNPK_HepG2_rep02	1.70402	0.411176
chr6	141170471	141170520	HNRNPK_HepG2_rep02	1.70402	0.411176
chr6	141173481	141173519	HNRNPK_HepG2_rep02	1.70402	0.411176
chr6	141173925	141173971	HNRNPK_HepG2_rep02	1.70402	0.411176
chr6	141167405	141167432	XRN2_K562_rep02	1.21045	0.41105
chr6	141167405	141167432	XRN2_K562_rep02	1.21045	0.41105
chr6	141167891	141167919	POLR2G_HepG2_rep01	1.694	0.410189
chr6	141167891	141167919	POLR2G_HepG2_rep01	1.694	0.410189
chr6	141172799	141172837	MATR3_HepG2_rep01	0.904787	0.407996
chr6	141172799	141172837	MATR3_HepG2_rep01	0.904787	0.407996
chr6	141167177	141167198	ILF3_HepG2_rep02	1.64009	0.404393
chr6	141173279	141173316	ILF3_HepG2_rep02	1.64009	0.404393
chr6	141167177	141167198	ILF3_HepG2_rep02	1.64009	0.404393
chr6	141173279	141173316	ILF3_HepG2_rep02	1.64009	0.404393
chr6	141170744	141170795	HNRNPU_HepG2_rep01	0.95881	0.402074
chr6	141170744	141170795	HNRNPU_HepG2_rep01	0.95881	0.402074
chr6	141167720	141167732	DDX52_HepG2_rep01	1.16344	0.4019
chr6	141167720	141167732	DDX52_HepG2_rep01	1.16344	0.4019
chr6	141172872	141172909	HNRNPC_HepG2_rep02	0.941167	0.400765
chr6	141172872	141172909	HNRNPC_HepG2_rep02	0.941167	0.400765
chr6	141167259	141167315	YBX3_K562_rep01	0.777379	0.400717
chr6	141167259	141167315	YBX3_K562_rep01	0.777379	0.400717
chr6	141167136	141167160	DROSHA_HepG2_rep01	1.60431	0.400117
chr6	141167136	141167160	DROSHA_HepG2_rep01	1.60431	0.400117
chr6	141170121	141170164	TROVE2_HepG2_rep01	0.64315	0.394806
chr6	141172319	141172359	TROVE2_HepG2_rep01	0.64315	0.394806
chr6	141170121	141170164	TROVE2_HepG2_rep01	0.64315	0.394806
chr6	141172319	141172359	TROVE2_HepG2_rep01	0.64315	0.394806
chr6	141173757	141173794	FUS_HepG2_rep01	1.04346	0.393542
chr6	141173757	141173794	FUS_HepG2_rep01	1.04346	0.393542
chr6	141172557	141172591	SAFB_HepG2_rep01	0.932066	0.39136
chr6	141172557	141172591	SAFB_HepG2_rep01	0.932066	0.39136
chr6	141168545	141168579	FUS_HepG2_rep02	1.5324	0.39057
chr6	141168545	141168579	FUS_HepG2_rep02	1.5324	0.39057
chr6	141173703	141173748	NKRF_HepG2_rep02	0.813434	0.389606
chr6	141173703	141173748	NKRF_HepG2_rep02	0.813434	0.389606
chr6	141167406	141167450	CSTF2_HepG2_rep02	1.07766	0.387731
chr6	141167406	141167450	CSTF2_HepG2_rep02	1.07766	0.387731
chr6	141173737	141173770	SLTM_HepG2_rep01	0.909291	0.386396
chr6	141173737	141173770	SLTM_HepG2_rep01	0.909291	0.386396
chr6	141170022	141170043	FUS_HepG2_rep02	1.85433	0.3857
chr6	141170318	141170349	FUS_HepG2_rep02	1.85433	0.3857
chr6	141170022	141170043	FUS_HepG2_rep02	1.85433	0.3857
chr6	141170318	141170349	FUS_HepG2_rep02	1.85433	0.3857
chr6	141173197	141173241	HNRNPK_HepG2_rep01	1.85765	0.385659
chr6	141173197	141173241	HNRNPK_HepG2_rep01	1.85765	0.385659
chr6	141170117	141170162	TIAL1_HepG2_rep01	1.74204	0.384747
chr6	141173612	141173637	TIAL1_HepG2_rep01	1.74204	0.384747
chr6	141170117	141170162	TIAL1_HepG2_rep01	1.74204	0.384747
chr6	141173612	141173637	TIAL1_HepG2_rep01	1.74204	0.384747
chr6	141167620	141167655	QKI_HepG2_rep02	1.40637	0.384308
chr6	141169736	141169748	QKI_HepG2_rep02	1.40637	0.384308
chr6	141167620	141167655	QKI_HepG2_rep02	1.40637	0.384308
chr6	141169736	141169748	QKI_HepG2_rep02	1.40637	0.384308
chr6	141173710	141173768	BCCIP_HepG2_rep01	1.66201	0.381359
chr6	141173710	141173768	BCCIP_HepG2_rep01	1.66201	0.381359
chr6	141167628	141167683	GRWD1_K562_rep01	1.61565	0.378414
chr6	141167628	141167683	GRWD1_K562_rep01	1.61565	0.378414
chr6	141173953	141173985	EIF3H_HepG2_rep01	0.910372	0.371853
chr6	141173953	141173985	EIF3H_HepG2_rep01	0.910372	0.371853
chr6	141171019	141171038	DROSHA_HepG2_rep02	1.51652	0.36987
chr6	141171019	141171038	DROSHA_HepG2_rep02	1.51652	0.36987
chr6	141168762	141168801	HNRNPC_HepG2_rep01	0.851788	0.367883
chr6	141168762	141168801	HNRNPC_HepG2_rep01	0.851788	0.367883
chr6	141171603	141171661	SND1_K562_rep01	1.17715	0.367549
chr6	141171603	141171661	SND1_K562_rep01	1.17715	0.367549
chr6	141167575	141167636	BCCIP_HepG2_rep02	1.48569	0.366634
chr6	141167575	141167636	BCCIP_HepG2_rep02	1.48569	0.366634
chr6	141170788	141170816	TROVE2_K562_rep01	0.87877	0.365178
chr6	141170788	141170816	TROVE2_K562_rep01	0.87877	0.365178
chr6	141174024	141174045	FUS_HepG2_rep01	1.75396	0.362718
chr6	141167340	141167372	DDX55_HepG2_rep02	0.754535	0.362561
chr6	141167340	141167372	DDX55_HepG2_rep02	0.754535	0.362561
chr6	141173745	141173793	RBFOX2_K562_rep01	1.64008	0.361911
chr6	141173745	141173793	RBFOX2_K562_rep01	1.64008	0.361911
chr6	141169655	141169691	HNRNPU_HepG2_rep01	1.80681	0.361469
chr6	141169655	141169691	HNRNPU_HepG2_rep01	1.80681	0.361469
chr6	141169242	141169298	PPIL4_K562_rep02	1.62519	0.361459
chr6	141169242	141169298	PPIL4_K562_rep02	1.62519	0.361459
chr6	141173147	141173214	SAFB2_K562_rep02	1.55424	0.358239
chr6	141173147	141173214	SAFB2_K562_rep02	1.55424	0.358239
chr6	141173580	141173633	MATR3_HepG2_rep01	0.682394	0.357783
chr6	141173580	141173633	MATR3_HepG2_rep01	0.682394	0.357783
chr6	141172113	141172140	DDX3X_HepG2_rep02	0.715467	0.357718
chr6	141172113	141172140	DDX3X_HepG2_rep02	0.715467	0.357718
chr6	141167911	141167932	HNRNPL_K562_rep02	1.49218	0.354045
chr6	141173897	141173944	HNRNPL_K562_rep02	1.49218	0.354045
chr6	141167911	141167932	HNRNPL_K562_rep02	1.49218	0.354045
chr6	141173897	141173944	HNRNPL_K562_rep02	1.49218	0.354045
chr6	141172072	141172097	DHX30_HepG2_rep01	0.712654	0.347579
chr6	141172072	141172097	DHX30_HepG2_rep01	0.712654	0.347579
chr6	141167408	141167435	UCHL5_K562_rep02	1.0206	0.346943
chr6	141167408	141167435	UCHL5_K562_rep02	1.0206	0.346943
chr6	141167594	141167680	ZNF622_K562_rep01	0.788458	0.346604
chr6	141167594	141167680	ZNF622_K562_rep01	0.788458	0.346604
chr6	141169651	141169691	KHDRBS1_K562_rep02	1.53437	0.345756
chr6	141169651	141169691	KHDRBS1_K562_rep02	1.53437	0.345756
chr6	141167425	141167439	DDX6_K562_rep02	0.97169	0.345316
chr6	141167425	141167439	DDX6_K562_rep02	0.97169	0.345316
chr6	141173830	141173887	SUGP2_HepG2_rep01	0.520762	0.344794
chr6	141173830	141173887	SUGP2_HepG2_rep01	0.520762	0.344794
chr6	141169735	141169761	XPO5_HepG2_rep02	0.689993	0.342672
chr6	141172782	141172812	XPO5_HepG2_rep02	0.689993	0.342672
chr6	141169735	141169761	XPO5_HepG2_rep02	0.689993	0.342672
chr6	141172782	141172812	XPO5_HepG2_rep02	0.689993	0.342672
chr6	141173491	141173503	MATR3_HepG2_rep01	1.22671	0.342076
chr6	141173491	141173503	MATR3_HepG2_rep01	1.22671	0.342076
chr6	141169632	141169649	KHSRP_HepG2_rep01	1.20263	0.34111
chr6	141169632	141169649	KHSRP_HepG2_rep01	1.20263	0.34111
chr6	141174057	141174058	U2AF2_HepG2_rep02	0.943005	0.339157
chr6	141167513	141167543	RBM22_HepG2_rep02	0.918122	0.338965
chr6	141167513	141167543	RBM22_HepG2_rep02	0.918122	0.338965
chr6	141168989	141169077	SAFB_HepG2_rep02	0.539114	0.33694
chr6	141168989	141169077	SAFB_HepG2_rep02	0.539114	0.33694
chr6	141167675	141167719	FXR2_HepG2_rep02	0.908263	0.336129
chr6	141167675	141167719	FXR2_HepG2_rep02	0.908263	0.336129
chr6	141168076	141168114	POLR2G_HepG2_rep01	1.01593	0.326762
chr6	141168076	141168114	POLR2G_HepG2_rep01	1.01593	0.326762
chr6	141170521	141170540	QKI_HepG2_rep02	0.821409	0.325447
chr6	141170521	141170540	QKI_HepG2_rep02	0.821409	0.325447
chr6	141173850	141173884	TIA1_HepG2_rep02	1.40601	0.325427
chr6	141173850	141173884	TIA1_HepG2_rep02	1.40601	0.325427
chr6	141170633	141170680	PTBP1_HepG2_rep01	0.997502	0.324739
chr6	141170633	141170680	PTBP1_HepG2_rep01	0.997502	0.324739
chr6	141171917	141171945	HNRNPUL1_HepG2_rep01	0.780029	0.321482
chr6	141171917	141171945	HNRNPUL1_HepG2_rep01	0.780029	0.321482
chr6	141172851	141172925	XRCC6_HepG2_rep01	1.23819	0.31942
chr6	141172851	141172925	XRCC6_HepG2_rep01	1.23819	0.31942
chr6	141173956	141173985	TROVE2_HepG2_rep02	0.771268	0.319393
chr6	141173956	141173985	TROVE2_HepG2_rep02	0.771268	0.319393
chr6	141171000	141171015	HLTF_HepG2_rep02	0.932309	0.313717
chr6	141171000	141171015	HLTF_HepG2_rep02	0.932309	0.313717
chr6	141173960	141173999	PPIG_HepG2_rep01	0.875869	0.309408
chr6	141173960	141173999	PPIG_HepG2_rep01	0.875869	0.309408
chr6	141170769	141170832	HLTF_HepG2_rep01	0.432903	0.308044
chr6	141170769	141170832	HLTF_HepG2_rep01	0.432903	0.308044
chr6	141170552	141170601	XRN2_HepG2_rep01	0.849311	0.306995
chr6	141170552	141170601	XRN2_HepG2_rep01	0.849311	0.306995
chr6	141167492	141167537	TAF15_HepG2_rep01	1.08798	0.302938
chr6	141167492	141167537	TAF15_HepG2_rep01	1.08798	0.302938
chr6	141167548	141167636	GRWD1_HepG2_rep02	0.614085	0.300987
chr6	141167548	141167636	GRWD1_HepG2_rep02	0.614085	0.300987
chr6	141172523	141172545	HNRNPC_HepG2_rep02	1.01156	0.300052
chr6	141173294	141173311	HNRNPC_HepG2_rep02	1.01156	0.300052
chr6	141172523	141172545	HNRNPC_HepG2_rep02	1.01156	0.300052
chr6	141173294	141173311	HNRNPC_HepG2_rep02	1.01156	0.300052
chr6	141171622	141171652	DROSHA_HepG2_rep02	1.00195	0.299534
chr6	141171622	141171652	DROSHA_HepG2_rep02	1.00195	0.299534
chr6	141168979	141169028	PABPN1_HepG2_rep02	0.767054	0.298071
chr6	141168979	141169028	PABPN1_HepG2_rep02	0.767054	0.298071
chr6	141169018	141169067	GTF2F1_HepG2_rep02	0.749811	0.295939
chr6	141169018	141169067	GTF2F1_HepG2_rep02	0.749811	0.295939
chr6	141167579	141167632	RBM5_HepG2_rep02	0.99491	0.294291
chr6	141167579	141167632	RBM5_HepG2_rep02	0.99491	0.294291
chr6	141173116	141173142	ZC3H11A_HepG2_rep01	0.969139	0.294104
chr6	141173116	141173142	ZC3H11A_HepG2_rep01	0.969139	0.294104
chr6	141173978	141174002	SFPQ_HepG2_rep01	0.956019	0.293906
chr6	141173978	141174002	SFPQ_HepG2_rep01	0.956019	0.293906
chr6	141171820	141171829	SAFB_HepG2_rep01	1.0576	0.292055
chr6	141171820	141171829	SAFB_HepG2_rep01	1.0576	0.292055
chr6	141173731	141173771	HNRNPL_HepG2_rep01	0.565574	0.291528
chr6	141173731	141173771	HNRNPL_HepG2_rep01	0.565574	0.291528
chr6	141173581	141173607	FUS_HepG2_rep01	1.16899	0.291285
chr6	141173581	141173607	FUS_HepG2_rep01	1.16899	0.291285
chr6	141169024	141169036	KHSRP_HepG2_rep02	0.866419	0.290719
chr6	141169024	141169036	KHSRP_HepG2_rep02	0.866419	0.290719
chr6	141174026	141174053	U2AF1_HepG2_rep01	0.982533	0.289776
chr6	141167596	141167643	KHSRP_HepG2_rep01	0.728701	0.286375
chr6	141167596	141167643	KHSRP_HepG2_rep01	0.728701	0.286375
chr6	141167629	141167697	SAFB_K562_rep01	0.985115	0.282854
chr6	141167629	141167697	SAFB_K562_rep01	0.985115	0.282854
chr6	141174004	141174056	AKAP1_HepG2_rep02	0.756649	0.28266
chr6	141174004	141174056	AKAP1_HepG2_rep02	0.756649	0.28266
chr6	141169848	141169892	TROVE2_HepG2_rep01	0.672897	0.281914
chr6	141169848	141169892	TROVE2_HepG2_rep01	0.672897	0.281914
chr6	141168513	141168559	U2AF2_HepG2_rep02	0.67997	0.278147
chr6	141168513	141168559	U2AF2_HepG2_rep02	0.67997	0.278147
chr6	141167575	141167647	XRCC6_HepG2_rep01	0.875616	0.277086
chr6	141167575	141167647	XRCC6_HepG2_rep01	0.875616	0.277086
chr6	141167899	141167925	HNRNPC_HepG2_rep01	0.951324	0.276186
chr6	141170846	141170856	HNRNPC_HepG2_rep01	0.951324	0.276186
chr6	141167899	141167925	HNRNPC_HepG2_rep01	0.951324	0.276186
chr6	141170846	141170856	HNRNPC_HepG2_rep01	0.951324	0.276186
chr6	141171610	141171669	LARP4_HepG2_rep01	0.68002	0.269721
chr6	141171610	141171669	LARP4_HepG2_rep01	0.68002	0.269721
chr6	141173201	141173208	QKI_HepG2_rep02	0.669405	0.262386
chr6	141173201	141173208	QKI_HepG2_rep02	0.669405	0.262386
chr6	141170964	141171015	HNRNPUL1_HepG2_rep01	0.516995	0.262018
chr6	141170964	141171015	HNRNPUL1_HepG2_rep01	0.516995	0.262018
chr6	141171612	141171651	XPO5_HepG2_rep02	0.578962	0.261764
chr6	141171612	141171651	XPO5_HepG2_rep02	0.578962	0.261764
chr6	141171101	141171143	U2AF2_HepG2_rep01	0.645888	0.261
chr6	141171101	141171143	U2AF2_HepG2_rep01	0.645888	0.261
chr6	141167570	141167657	BUD13_HepG2_rep02	0.593056	0.259882
chr6	141167570	141167657	BUD13_HepG2_rep02	0.593056	0.259882
chr6	141173672	141173739	NCBP2_HepG2_rep01	0.665606	0.256304
chr6	141173672	141173739	NCBP2_HepG2_rep01	0.665606	0.256304
chr6	141168761	141168814	TAF15_HepG2_rep02	0.638476	0.255551
chr6	141168761	141168814	TAF15_HepG2_rep02	0.638476	0.255551
chr6	141167409	141167429	U2AF2_HepG2_rep02	0.457578	0.252794
chr6	141167409	141167429	U2AF2_HepG2_rep02	0.457578	0.252794
chr6	141167902	141167924	SAFB_HepG2_rep02	0.769727	0.244584
chr6	141167902	141167924	SAFB_HepG2_rep02	0.769727	0.244584
chr6	141170404	141170489	HNRNPA1_HepG2_rep01	0.934717	0.242607
chr6	141170404	141170489	HNRNPA1_HepG2_rep01	0.934717	0.242607
chr6	141167812	141167839	HNRNPL_HepG2_rep02	0.590111	0.233461
chr6	141167812	141167839	HNRNPL_HepG2_rep02	0.590111	0.233461
chr6	141167661	141167768	DGCR8_HepG2_rep01	0.550674	0.232917
chr6	141167661	141167768	DGCR8_HepG2_rep01	0.550674	0.232917
chr6	141171911	141171962	ZC3H11A_HepG2_rep02	0.482844	0.22439
chr6	141171911	141171962	ZC3H11A_HepG2_rep02	0.482844	0.22439
chr6	141171460	141171499	SAFB_HepG2_rep01	0.642559	0.221531
chr6	141171460	141171499	SAFB_HepG2_rep01	0.642559	0.221531
chr6	141173124	141173193	DROSHA_HepG2_rep02	0.516521	0.218819
chr6	141173124	141173193	DROSHA_HepG2_rep02	0.516521	0.218819
chr6	141167405	141167448	SAFB_HepG2_rep02	0.480221	0.204774
chr6	141167405	141167448	SAFB_HepG2_rep02	0.480221	0.204774
chr6	141172311	141172337	TAF15_K562_rep02	1.57597	0.204115
chr6	141172311	141172337	TAF15_K562_rep02	1.57597	0.204115
chr6	141167126	141167160	NCBP2_HepG2_rep01	1.44321	0.202868
chr6	141168205	141168220	NCBP2_HepG2_rep01	1.44321	0.202868
chr6	141167126	141167160	NCBP2_HepG2_rep01	1.44321	0.202868
chr6	141168205	141168220	NCBP2_HepG2_rep01	1.44321	0.202868
chr6	141168510	141168545	HLTF_HepG2_rep01	0.532438	0.202781
chr6	141168510	141168545	HLTF_HepG2_rep01	0.532438	0.202781
chr6	141171805	141171832	RBFOX2_HepG2_rep02	1.43737	0.202763
chr6	141171805	141171832	RBFOX2_HepG2_rep02	1.43737	0.202763
chr6	141167406	141167432	SMNDC1_K562_rep01	1.41182	0.202255
chr6	141167406	141167432	SMNDC1_K562_rep01	1.41182	0.202255
chr6	141167910	141167933	DGCR8_HepG2_rep02	1.38301	0.201589
chr6	141170844	141170852	DGCR8_HepG2_rep02	1.38301	0.201589
chr6	141170852	141170878	DGCR8_HepG2_rep02	1.38301	0.201589
chr6	141167910	141167933	DGCR8_HepG2_rep02	1.38301	0.201589
chr6	141170844	141170852	DGCR8_HepG2_rep02	1.38301	0.201589
chr6	141170852	141170878	DGCR8_HepG2_rep02	1.38301	0.201589
chr6	141173194	141173215	TIAL1_HepG2_rep02	1.37512	0.201389
chr6	141173194	141173215	TIAL1_HepG2_rep02	1.37512	0.201389
chr6	141172902	141172940	HNRNPUL1_K562_rep01	1.35915	0.200962
chr6	141172902	141172940	HNRNPUL1_K562_rep01	1.35915	0.200962
chr6	141167412	141167424	U2AF1_K562_rep01	1.30883	0.199423
chr6	141167412	141167424	U2AF1_K562_rep01	1.30883	0.199423
chr6	141172338	141172371	ILF3_K562_rep02	1.29066	0.198796
chr6	141173307	141173335	ILF3_K562_rep02	1.29066	0.198796
chr6	141172338	141172371	ILF3_K562_rep02	1.29066	0.198796
chr6	141173307	141173335	ILF3_K562_rep02	1.29066	0.198796
chr6	141170909	141170941	POLR2G_HepG2_rep01	1.27897	0.198373
chr6	141170909	141170941	POLR2G_HepG2_rep01	1.27897	0.198373
chr6	141167343	141167359	QKI_HepG2_rep01	1.27634	0.198276
chr6	141167343	141167359	QKI_HepG2_rep01	1.27634	0.198276
chr6	141170118	141170150	GRSF1_HepG2_rep02	1.24585	0.197093
chr6	141173747	141173775	GRSF1_HepG2_rep02	1.24585	0.197093
chr6	141170118	141170150	GRSF1_HepG2_rep02	1.24585	0.197093
chr6	141173747	141173775	GRSF1_HepG2_rep02	1.24585	0.197093
chr6	141170970	141170994	IGF2BP1_K562_rep02	1.23505	0.19665
chr6	141170970	141170994	IGF2BP1_K562_rep02	1.23505	0.19665
chr6	141170373	141170480	HNRNPU_HepG2_rep01	0.359348	0.19569
chr6	141170373	141170480	HNRNPU_HepG2_rep01	0.359348	0.19569
chr6	141167396	141167414	TIA1_K562_rep01	1.20068	0.195158
chr6	141167396	141167414	TIA1_K562_rep01	1.20068	0.195158
chr6	141170424	141170454	HNRNPL_HepG2_rep01	0.488407	0.187367
chr6	141170424	141170454	HNRNPL_HepG2_rep01	0.488407	0.187367
chr6	141167898	141167929	SRSF7_HepG2_rep01	1.02305	0.185601
chr6	141170411	141170443	SRSF7_HepG2_rep01	1.02305	0.185601
chr6	141167898	141167929	SRSF7_HepG2_rep01	1.02305	0.185601
chr6	141170411	141170443	SRSF7_HepG2_rep01	1.02305	0.185601
chr6	141172478	141172517	ZC3H11A_HepG2_rep02	0.51937	0.185373
chr6	141172478	141172517	ZC3H11A_HepG2_rep02	0.51937	0.185373
chr6	141171454	141171486	TIAL1_HepG2_rep01	1.00508	0.184479
chr6	141171454	141171486	TIAL1_HepG2_rep01	1.00508	0.184479
chr6	141167438	141167474	TIAL1_HepG2_rep01	1.42012	0.184155
chr6	141167438	141167474	TIAL1_HepG2_rep01	1.42012	0.184155
chr6	141168263	141168304	DGCR8_HepG2_rep01	1.38075	0.184079
chr6	141168263	141168304	DGCR8_HepG2_rep01	1.38075	0.184079
chr6	141172414	141172428	TAF15_HepG2_rep02	1.37544	0.184053
chr6	141172414	141172428	TAF15_HepG2_rep02	1.37544	0.184053
chr6	141173688	141173704	U2AF1_HepG2_rep02	1.3254	0.183629
chr6	141173688	141173704	U2AF1_HepG2_rep02	1.3254	0.183629
chr6	141170838	141170870	FTO_HepG2_rep01	1.07613	0.183574
chr6	141170838	141170870	FTO_HepG2_rep01	1.07613	0.183574
chr6	141170114	141170150	FUBP3_HepG2_rep01	1.07515	0.183562
chr6	141170114	141170150	FUBP3_HepG2_rep01	1.07515	0.183562
chr6	141167501	141167511	DDX52_HepG2_rep02	1.01728	0.182614
chr6	141171085	141171089	DDX52_HepG2_rep02	1.01728	0.182614
chr6	141173120	141173124	DDX52_HepG2_rep02	1.01728	0.182614
chr6	141167501	141167511	DDX52_HepG2_rep02	1.01728	0.182614
chr6	141171085	141171089	DDX52_HepG2_rep02	1.01728	0.182614
chr6	141173120	141173124	DDX52_HepG2_rep02	1.01728	0.182614
chr6	141173959	141173986	ZNF622_K562_rep02	1.00841	0.18243
chr6	141173959	141173986	ZNF622_K562_rep02	1.00841	0.18243
chr6	141169237	141169276	SRSF1_K562_rep02	1.22766	0.181874
chr6	141169237	141169276	SRSF1_K562_rep02	1.22766	0.181874
chr6	141169245	141169263	HNRNPU_HepG2_rep01	1.22184	0.181732
chr6	141171218	141171221	HNRNPU_HepG2_rep01	1.22184	0.181732
chr6	141169245	141169263	HNRNPU_HepG2_rep01	1.22184	0.181732
chr6	141171218	141171221	HNRNPU_HepG2_rep01	1.22184	0.181732
chr6	141170781	141170820	HNRNPC_HepG2_rep01	0.43675	0.181405
chr6	141170781	141170820	HNRNPC_HepG2_rep01	0.43675	0.181405
chr6	141171637	141171675	HNRNPL_K562_rep01	1.1917	0.180931
chr6	141171637	141171675	HNRNPL_K562_rep01	1.1917	0.180931
chr6	141173673	141173705	NKRF_HepG2_rep01	0.929604	0.180349
chr6	141173673	141173705	NKRF_HepG2_rep01	0.929604	0.180349
chr6	141170032	141170061	FUS_HepG2_rep01	1.16899	0.180255
chr6	141170032	141170061	FUS_HepG2_rep01	1.16899	0.180255
chr6	141172807	141172839	AKAP8L_K562_rep01	0.889158	0.178976
chr6	141172807	141172839	AKAP8L_K562_rep01	0.889158	0.178976
chr6	141167290	141167309	XRN2_K562_rep01	0.870259	0.178265
chr6	141173170	141173208	XRN2_K562_rep01	0.870259	0.178265
chr6	141167290	141167309	XRN2_K562_rep01	0.870259	0.178265
chr6	141173170	141173208	XRN2_K562_rep01	0.870259	0.178265
chr6	141173962	141173990	EXOSC5_K562_rep01	0.84618	0.177297
chr6	141173962	141173990	EXOSC5_K562_rep01	0.84618	0.177297
chr6	141168983	141169050	SAFB_HepG2_rep01	0.379525	0.176461
chr6	141168983	141169050	SAFB_HepG2_rep01	0.379525	0.176461
chr6	141168123	141168158	RBFOX2_K562_rep01	1.05511	0.175982
chr6	141169445	141169475	RBFOX2_K562_rep01	1.05511	0.175982
chr6	141169647	141169688	RBFOX2_K562_rep01	1.05511	0.175982
chr6	141168123	141168158	RBFOX2_K562_rep01	1.05511	0.175982
chr6	141169445	141169475	RBFOX2_K562_rep01	1.05511	0.175982
chr6	141169647	141169688	RBFOX2_K562_rep01	1.05511	0.175982
chr6	141173945	141173972	SRSF1_HepG2_rep02	1.00461	0.173645
chr6	141173945	141173972	SRSF1_HepG2_rep02	1.00461	0.173645
chr6	141172471	141172504	SND1_K562_rep01	0.762112	0.173389
chr6	141172471	141172504	SND1_K562_rep01	0.762112	0.173389
chr6	141167976	141168012	SAFB2_K562_rep02	1.2912	0.173354
chr6	141171899	141171953	SAFB2_K562_rep02	1.2912	0.173354
chr6	141167976	141168012	SAFB2_K562_rep02	1.2912	0.173354
chr6	141171899	141171953	SAFB2_K562_rep02	1.2912	0.173354
chr6	141173964	141174010	PRPF4_HepG2_rep01	1.3626	0.173306
chr6	141173964	141174010	PRPF4_HepG2_rep01	1.3626	0.173306
chr6	141172464	141172492	HNRNPL_K562_rep02	1.22914	0.172836
chr6	141172464	141172492	HNRNPL_K562_rep02	1.22914	0.172836
chr6	141173692	141173757	KHSRP_HepG2_rep02	0.396933	0.172469
chr6	141173692	141173757	KHSRP_HepG2_rep02	0.396933	0.172469
chr6	141169953	141169960	TROVE2_HepG2_rep01	0.865542	0.172177
chr6	141169953	141169960	TROVE2_HepG2_rep01	0.865542	0.172177
chr6	141173732	141173759	TRA2A_HepG2_rep02	0.736985	0.172068
chr6	141173732	141173759	TRA2A_HepG2_rep02	0.736985	0.172068
chr6	141167887	141167913	SAFB_K562_rep01	1.13712	0.171139
chr6	141167887	141167913	SAFB_K562_rep01	1.13712	0.171139
chr6	141168621	141168664	SAFB2_K562_rep01	1.12077	0.170726
chr6	141169311	141169347	SAFB2_K562_rep01	1.12077	0.170726
chr6	141168621	141168664	SAFB2_K562_rep01	1.12077	0.170726
chr6	141169311	141169347	SAFB2_K562_rep01	1.12077	0.170726
chr6	141171617	141171670	HNRNPA1_K562_rep01	1.06322	0.169013
chr6	141171617	141171670	HNRNPA1_K562_rep01	1.06322	0.169013
chr6	141167142	141167152	LARP4_HepG2_rep01	0.68002	0.168829
chr6	141167142	141167152	LARP4_HepG2_rep01	0.68002	0.168829
chr6	141168076	141168111	KHDRBS1_K562_rep02	1.04894	0.168528
chr6	141168076	141168111	KHDRBS1_K562_rep02	1.04894	0.168528
chr6	141167419	141167439	KHDRBS1_K562_rep02	1.31197	0.166522
chr6	141167419	141167439	KHDRBS1_K562_rep02	1.31197	0.166522
chr6	141172313	141172359	TAF15_HepG2_rep02	0.512945	0.164842
chr6	141172313	141172359	TAF15_HepG2_rep02	0.512945	0.164842
chr6	141167275	141167298	PABPN1_HepG2_rep02	0.615051	0.164747
chr6	141167275	141167298	PABPN1_HepG2_rep02	0.615051	0.164747
chr6	141172320	141172351	NOL12_HepG2_rep01	0.700447	0.163692
chr6	141172320	141172351	NOL12_HepG2_rep01	0.700447	0.163692
chr6	141173707	141173773	FUS_K562_rep02	1.05044	0.16364
chr6	141173707	141173773	FUS_K562_rep02	1.05044	0.16364
chr6	141167842	141167875	GTF2F1_HepG2_rep02	0.597808	0.163599
chr6	141169447	141169465	GTF2F1_HepG2_rep02	0.597808	0.163599
chr6	141167842	141167875	GTF2F1_HepG2_rep02	0.597808	0.163599
chr6	141169447	141169465	GTF2F1_HepG2_rep02	0.597808	0.163599
chr6	141172501	141172534	GRSF1_HepG2_rep01	0.586905	0.16286
chr6	141172501	141172534	GRSF1_HepG2_rep01	0.586905	0.16286
chr6	141172324	141172366	HNRNPA1_K562_rep02	0.986493	0.162714
chr6	141172324	141172366	HNRNPA1_K562_rep02	0.986493	0.162714
chr6	141167488	141167525	NCBP2_HepG2_rep01	0.858251	0.161306
chr6	141167488	141167525	NCBP2_HepG2_rep01	0.858251	0.161306
chr6	141173629	141173677	HNRNPU_K562_rep01	1.06182	0.160293
chr6	141173629	141173677	HNRNPU_K562_rep01	1.06182	0.160293
chr6	141172280	141172314	DGCR8_HepG2_rep02	0.798047	0.159859
chr6	141172280	141172314	DGCR8_HepG2_rep02	0.798047	0.159859
chr6	141167624	141167639	SUPV3L1_HepG2_rep01	0.637928	0.158911
chr6	141167624	141167639	SUPV3L1_HepG2_rep01	0.637928	0.158911
chr6	141169724	141169768	HNRNPA1_HepG2_rep02	1.20246	0.158698
chr6	141171615	141171661	HNRNPA1_HepG2_rep02	1.20246	0.158698
chr6	141169724	141169768	HNRNPA1_HepG2_rep02	1.20246	0.158698
chr6	141171615	141171661	HNRNPA1_HepG2_rep02	1.20246	0.158698
chr6	141168577	141168614	AGGF1_HepG2_rep02	0.724596	0.157445
chr6	141168577	141168614	AGGF1_HepG2_rep02	0.724596	0.157445
chr6	141173321	141173364	NCBP2_HepG2_rep02	0.723702	0.157412
chr6	141173321	141173364	NCBP2_HepG2_rep02	0.723702	0.157412
chr6	141173692	141173737	HNRNPK_HepG2_rep02	0.704015	0.156646
chr6	141173692	141173737	HNRNPK_HepG2_rep02	0.704015	0.156646
chr6	141168613	141168650	KHSRP_HepG2_rep02	0.544491	0.156281
chr6	141168613	141168650	KHSRP_HepG2_rep02	0.544491	0.156281
chr6	141167411	141167444	POLR2G_HepG2_rep01	0.694003	0.156239
chr6	141167411	141167444	POLR2G_HepG2_rep01	0.694003	0.156239
chr6	141173191	141173207	SFPQ_HepG2_rep02	0.499276	0.15516
chr6	141173191	141173207	SFPQ_HepG2_rep02	0.499276	0.15516
chr6	141172922	141172929	DDX52_HepG2_rep02	0.432313	0.152268
chr6	141172922	141172929	DDX52_HepG2_rep02	0.432313	0.152268
chr6	141167136	141167161	LSM11_K562_rep01	0.43412	0.151321
chr6	141167136	141167161	LSM11_K562_rep01	0.43412	0.151321
chr6	141168733	141168816	DROSHA_HepG2_rep02	0.387238	0.151269
chr6	141168733	141168816	DROSHA_HepG2_rep02	0.387238	0.151269
chr6	141167905	141167937	EIF3D_HepG2_rep01	0.916567	0.151038
chr6	141167905	141167937	EIF3D_HepG2_rep01	0.916567	0.151038
chr6	141173576	141173612	HNRNPK_HepG2_rep01	0.857653	0.150865
chr6	141173576	141173612	HNRNPK_HepG2_rep01	0.857653	0.150865
chr6	141173197	141173218	FUS_HepG2_rep02	0.854325	0.15084
chr6	141173197	141173218	FUS_HepG2_rep02	0.854325	0.15084
chr6	141173711	141173758	ZNF800_HepG2_rep01	0.777057	0.150836
chr6	141173711	141173758	ZNF800_HepG2_rep01	0.777057	0.150836
chr6	141167500	141167522	BCLAF1_HepG2_rep02	0.762295	0.150703
chr6	141167980	141168001	BCLAF1_HepG2_rep02	0.762295	0.150703
chr6	141167500	141167522	BCLAF1_HepG2_rep02	0.762295	0.150703
chr6	141167980	141168001	BCLAF1_HepG2_rep02	0.762295	0.150703
chr6	141173470	141173509	NKRF_HepG2_rep01	0.759679	0.150676
chr6	141173470	141173509	NKRF_HepG2_rep01	0.759679	0.150676
chr6	141167483	141167518	PRPF8_HepG2_rep01	0.755349	0.150629
chr6	141167483	141167518	PRPF8_HepG2_rep01	0.755349	0.150629
chr6	141173285	141173345	ILF3_K562_rep01	0.768031	0.149625
chr6	141173285	141173345	ILF3_K562_rep01	0.768031	0.149625
chr6	141172747	141172802	TIAL1_HepG2_rep01	0.742044	0.149051
chr6	141172747	141172802	TIAL1_HepG2_rep01	0.742044	0.149051
chr6	141173295	141173313	XPO5_HepG2_rep02	0.426959	0.148272
chr6	141173295	141173313	XPO5_HepG2_rep02	0.426959	0.148272
chr6	141171612	141171655	HNRNPU_K562_rep02	1.27403	0.148119
chr6	141171612	141171655	HNRNPU_K562_rep02	1.27403	0.148119
chr6	141171081	141171104	TROVE2_HepG2_rep02	0.356231	0.145148
chr6	141171081	141171104	TROVE2_HepG2_rep02	0.356231	0.145148
chr6	141170126	141170163	POLR2G_HepG2_rep02	0.536774	0.144754
chr6	141170126	141170163	POLR2G_HepG2_rep02	0.536774	0.144754
chr6	141173579	141173597	DHX30_HepG2_rep02	0.387579	0.144171
chr6	141173579	141173597	DHX30_HepG2_rep02	0.387579	0.144171
chr6	141170027	141170060	LARP4_HepG2_rep01	0.510095	0.143588
chr6	141170027	141170060	LARP4_HepG2_rep01	0.510095	0.143588
chr6	141173967	141174002	NOLC1_K562_rep02	0.786182	0.143361
chr6	141173967	141174002	NOLC1_K562_rep02	0.786182	0.143361
chr6	141170599	141170666	HNRNPL_K562_rep01	0.776661	0.143265
chr6	141170599	141170666	HNRNPL_K562_rep01	0.776661	0.143265
chr6	141169090	141169099	SAFB_HepG2_rep01	0.642559	0.140498
chr6	141169090	141169099	SAFB_HepG2_rep01	0.642559	0.140498
chr6	141167642	141167681	PABPN1_HepG2_rep02	0.445126	0.140381
chr6	141172339	141172382	PABPN1_HepG2_rep02	0.445126	0.140381
chr6	141167642	141167681	PABPN1_HepG2_rep02	0.445126	0.140381
chr6	141172339	141172382	PABPN1_HepG2_rep02	0.445126	0.140381
chr6	141173970	141173993	UCHL5_K562_rep01	0.513674	0.139844
chr6	141173970	141173993	UCHL5_K562_rep01	0.513674	0.139844
chr6	141167602	141167641	GTF2F1_HepG2_rep02	0.427883	0.139445
chr6	141167602	141167641	GTF2F1_HepG2_rep02	0.427883	0.139445
chr6	141173108	141173122	SFPQ_HepG2_rep01	0.692985	0.138575
chr6	141173108	141173122	SFPQ_HepG2_rep01	0.692985	0.138575
chr6	141172293	141172371	HLTF_HepG2_rep01	0.25233	0.138185
chr6	141172293	141172371	HLTF_HepG2_rep01	0.25233	0.138185
chr6	141167828	141167866	HNRNPL_K562_rep02	0.714571	0.137875
chr6	141167828	141167866	HNRNPL_K562_rep02	0.714571	0.137875
chr6	141171731	141171773	FASTKD2_HepG2_rep02	0.520806	0.136597
chr6	141171731	141171773	FASTKD2_HepG2_rep02	0.520806	0.136597
chr6	141170019	141170063	CDC40_HepG2_rep01	0.474885	0.136588
chr6	141170019	141170063	CDC40_HepG2_rep01	0.474885	0.136588
chr6	141170388	141170437	TIAL1_HepG2_rep02	0.527124	0.135322
chr6	141170388	141170437	TIAL1_HepG2_rep02	0.527124	0.135322
chr6	141170885	141170924	HNRNPUL1_HepG2_rep01	0.458101	0.134749
chr6	141170885	141170924	HNRNPUL1_HepG2_rep01	0.458101	0.134749
chr6	141169798	141169844	KHSRP_HepG2_rep02	0.451381	0.133311
chr6	141169798	141169844	KHSRP_HepG2_rep02	0.451381	0.133311
chr6	141172591	141172609	PTBP1_HepG2_rep02	0.361743	0.133124
chr6	141172591	141172609	PTBP1_HepG2_rep02	0.361743	0.133124
chr6	141171746	141171756	SUPV3L1_HepG2_rep02	0.229213	0.132789
chr6	141171746	141171756	SUPV3L1_HepG2_rep02	0.229213	0.132789
chr6	141171162	141171186	HNRNPUL1_HepG2_rep02	0.354505	0.13273
chr6	141173491	141173511	HNRNPUL1_HepG2_rep02	0.354505	0.13273
chr6	141171162	141171186	HNRNPUL1_HepG2_rep02	0.354505	0.13273
chr6	141173491	141173511	HNRNPUL1_HepG2_rep02	0.354505	0.13273
chr6	141167630	141167663	POLR2G_HepG2_rep01	0.430968	0.131609
chr6	141170599	141170651	POLR2G_HepG2_rep01	0.430968	0.131609
chr6	141167630	141167663	POLR2G_HepG2_rep01	0.430968	0.131609
chr6	141170599	141170651	POLR2G_HepG2_rep01	0.430968	0.131609
chr6	141173633	141173744	SSB_HepG2_rep01	0.687205	0.131558
chr6	141173633	141173744	SSB_HepG2_rep01	0.687205	0.131558
chr6	141169870	141169889	QKI_HepG2_rep01	0.691381	0.130861
chr6	141169870	141169889	QKI_HepG2_rep01	0.691381	0.130861
chr6	141168752	141168814	POLR2G_HepG2_rep01	0.694003	0.130855
chr6	141172058	141172109	POLR2G_HepG2_rep01	0.694003	0.130855
chr6	141168752	141168814	POLR2G_HepG2_rep01	0.694003	0.130855
chr6	141172058	141172109	POLR2G_HepG2_rep01	0.694003	0.130855
chr6	141167569	141167619	RBM15_HepG2_rep01	0.516863	0.128786
chr6	141167569	141167619	RBM15_HepG2_rep01	0.516863	0.128786
chr6	141173283	141173304	SFPQ_HepG2_rep02	0.329351	0.127273
chr6	141173283	141173304	SFPQ_HepG2_rep02	0.329351	0.127273
chr6	141172263	141172354	TAF15_HepG2_rep01	0.3961	0.12618
chr6	141172263	141172354	TAF15_HepG2_rep01	0.3961	0.12618
chr6	141170420	141170449	HNRNPL_HepG2_rep02	0.438108	0.125478
chr6	141173873	141173906	HNRNPL_HepG2_rep02	0.438108	0.125478
chr6	141170420	141170449	HNRNPL_HepG2_rep02	0.438108	0.125478
chr6	141173873	141173906	HNRNPL_HepG2_rep02	0.438108	0.125478
chr6	141171945	141171988	PABPN1_HepG2_rep02	0.352017	0.124101
chr6	141171945	141171988	PABPN1_HepG2_rep02	0.352017	0.124101
chr6	141167689	141167718	DDX52_HepG2_rep02	0.432313	0.123467
chr6	141167689	141167718	DDX52_HepG2_rep02	0.432313	0.123467
chr6	141172582	141172610	RBM5_HepG2_rep01	0.54144	0.122522
chr6	141172582	141172610	RBM5_HepG2_rep01	0.54144	0.122522
chr6	141173395	141173431	DROSHA_HepG2_rep02	0.416985	0.12146
chr6	141173395	141173431	DROSHA_HepG2_rep02	0.416985	0.12146
chr6	141169603	141169632	KHSRP_HepG2_rep02	0.451381	0.121175
chr6	141169603	141169632	KHSRP_HepG2_rep02	0.451381	0.121175
chr6	141170742	141170783	HNRNPU_HepG2_rep02	0.661853	0.12114
chr6	141170742	141170783	HNRNPU_HepG2_rep02	0.661853	0.12114
chr6	141170609	141170634	SAFB_HepG2_rep01	0.472634	0.119854
chr6	141170609	141170634	SAFB_HepG2_rep01	0.472634	0.119854
chr6	141173878	141173932	KHSRP_K562_rep02	0.583952	0.118299
chr6	141173878	141173932	KHSRP_K562_rep02	0.583952	0.118299
chr6	141170613	141170651	HNRNPC_HepG2_rep01	0.39493	0.117698
chr6	141170613	141170651	HNRNPC_HepG2_rep01	0.39493	0.117698
chr6	141173711	141173782	CSTF2T_HepG2_rep01	0.398526	0.116884
chr6	141173711	141173782	CSTF2T_HepG2_rep01	0.398526	0.116884
chr6	141173856	141173898	PTBP1_HepG2_rep01	0.482929	0.116628
chr6	141173856	141173898	PTBP1_HepG2_rep01	0.482929	0.116628
chr6	141167576	141167656	FUS_HepG2_rep02	0.339752	0.113362
chr6	141167576	141167656	FUS_HepG2_rep02	0.339752	0.113362
chr6	141172288	141172366	HNRNPC_HepG2_rep02	0.282204	0.111607
chr6	141172288	141172366	HNRNPC_HepG2_rep02	0.282204	0.111607
chr6	141169387	141169409	HNRNPC_HepG2_rep01	0.629395	0.111486
chr6	141169387	141169409	HNRNPC_HepG2_rep01	0.629395	0.111486
chr6	141167912	141167928	HNRNPL_HepG2_rep01	0.372929	0.110941
chr6	141167912	141167928	HNRNPL_HepG2_rep01	0.372929	0.110941
chr6	141172576	141172607	ZC3H11A_HepG2_rep02	0.460476	0.109959
chr6	141172576	141172607	ZC3H11A_HepG2_rep02	0.460476	0.109959
chr6	141173564	141173588	HLTF_HepG2_rep02	0.365269	0.107922
chr6	141173564	141173588	HLTF_HepG2_rep02	0.365269	0.107922
chr6	141172593	141172611	TROVE2_HepG2_rep01	0.187471	0.107787
chr6	141172593	141172611	TROVE2_HepG2_rep01	0.187471	0.107787
chr6	141173969	141174001	FUS_HepG2_rep01	0.490923	0.106835
chr6	141173969	141174001	FUS_HepG2_rep01	0.490923	0.106835
chr6	141173178	141173216	HNRNPC_HepG2_rep02	0.52613	0.106607
chr6	141173178	141173216	HNRNPC_HepG2_rep02	0.52613	0.106607
chr6	141172565	141172608	SAFB_HepG2_rep02	0.480221	0.102887
chr6	141172565	141172608	SAFB_HepG2_rep02	0.480221	0.102887
chr6	141171924	141171965	HLTF_HepG2_rep02	0.387989	0.100721
chr6	141171924	141171965	HLTF_HepG2_rep02	0.387989	0.100721
chr6	141173280	141173318	EIF3D_HepG2_rep01	0.00967657	0.0986452
chr6	141173280	141173318	EIF3D_HepG2_rep01	0.00967657	0.0986452
chr6	141170953	141171010	KHSRP_HepG2_rep02	0.32585	0.0986343
chr6	141170953	141171010	KHSRP_HepG2_rep02	0.32585	0.0986343
chr6	141167972	141168010	HLTF_HepG2_rep02	0.00269855	0.0976761
chr6	141169452	141169485	HLTF_HepG2_rep02	0.00269855	0.0976761
chr6	141167972	141168010	HLTF_HepG2_rep02	0.00269855	0.0976761
chr6	141169452	141169485	HLTF_HepG2_rep02	0.00269855	0.0976761
chr6	141171796	141171815	ZC3H11A_HepG2_rep01	0.454566	0.096194
chr6	141171796	141171815	ZC3H11A_HepG2_rep01	0.454566	0.096194
chr6	141172327	141172380	ZC3H11A_HepG2_rep02	0.267831	0.0931372
chr6	141172327	141172380	ZC3H11A_HepG2_rep02	0.267831	0.0931372
chr6	141171619	141171650	ZC3H11A_HepG2_rep02	0.367367	0.0853501
chr6	141171619	141171650	ZC3H11A_HepG2_rep02	0.367367	0.0853501
chr6	141172878	141172923	U2AF2_HepG2_rep01	0.020283	0.0848535
chr6	141172878	141172923	U2AF2_HepG2_rep01	0.020283	0.0848535
chr6	141167405	141167457	XPO5_HepG2_rep02	0.0119213	0.0841308
chr6	141167405	141167457	XPO5_HepG2_rep02	0.0119213	0.0841308
chr6	141167854	141167866	HNRNPL_HepG2_rep01	0.0510013	0.0838726
chr6	141167854	141167866	HNRNPL_HepG2_rep01	0.0510013	0.0838726
chr6	141171914	141171937	HLTF_HepG2_rep01	0.392261	0.0799811
chr6	141171914	141171937	HLTF_HepG2_rep01	0.392261	0.0799811
chr6	141172276	141172335	RBM5_HepG2_rep01	0.371515	0.079355
chr6	141172276	141172335	RBM5_HepG2_rep01	0.371515	0.079355
chr6	141173307	141173345	EIF3D_HepG2_rep02	0.0554687	0.07848
chr6	141173307	141173345	EIF3D_HepG2_rep02	0.0554687	0.07848
chr6	141170578	141170644	HNRNPU_HepG2_rep01	0.359348	0.0765125
chr6	141170578	141170644	HNRNPU_HepG2_rep01	0.359348	0.0765125
chr6	141173194	141173221	SUGP2_HepG2_rep01	0.298369	0.0761863
chr6	141173194	141173221	SUGP2_HepG2_rep01	0.298369	0.0761863
chr6	141167877	141167936	HNRNPUL1_HepG2_rep01	0.364991	0.0719833
chr6	141171719	141171768	HNRNPUL1_HepG2_rep01	0.364991	0.0719833
chr6	141167877	141167936	HNRNPUL1_HepG2_rep01	0.364991	0.0719833
chr6	141171719	141171768	HNRNPUL1_HepG2_rep01	0.364991	0.0719833
chr6	141173688	141173771	EIF3D_HepG2_rep01	0.179602	0.0710718
chr6	141173688	141173771	EIF3D_HepG2_rep01	0.179602	0.0710718
chr6	141172877	141172928	MATR3_HepG2_rep02	0.296887	0.0663609
chr6	141172877	141172928	MATR3_HepG2_rep02	0.296887	0.0663609
chr6	141170598	141170628	QKI_HepG2_rep01	0.0539506	0.06584
chr6	141170598	141170628	QKI_HepG2_rep01	0.0539506	0.06584
chr6	141171170	141171220	ZC3H11A_HepG2_rep01	0.258646	0.0652693
chr6	141171170	141171220	ZC3H11A_HepG2_rep01	0.258646	0.0652693
chr6	141173198	141173219	QKI_HepG2_rep01	0.369452	0.0635667
chr6	141173198	141173219	QKI_HepG2_rep01	0.369452	0.0635667
chr6	141171589	141171645	SAFB_HepG2_rep01	0.250242	0.0604208
chr6	141171589	141171645	SAFB_HepG2_rep01	0.250242	0.0604208
chr6	141170402	141170446	SAFB_HepG2_rep01	0.279989	0.0601115
chr6	141170402	141170446	SAFB_HepG2_rep01	0.279989	0.0601115
chr6	141170117	141170152	DDX52_HepG2_rep01	0.356087	0.0597625
chr6	141172297	141172355	DDX52_HepG2_rep01	0.356087	0.0597625
chr6	141170117	141170152	DDX52_HepG2_rep01	0.356087	0.0597625
chr6	141172297	141172355	DDX52_HepG2_rep01	0.356087	0.0597625
chr6	141171326	141171370	KHSRP_HepG2_rep01	0.0733491	0.0591151
chr6	141171326	141171370	KHSRP_HepG2_rep01	0.0733491	0.0591151
chr6	141172298	141172359	XRN2_HepG2_rep01	0.112345	0.0566935
chr6	141172298	141172359	XRN2_HepG2_rep01	0.112345	0.0566935
chr6	141167397	141167441	CDC40_HepG2_rep01	0.0598474	0.0542656
chr6	141167397	141167441	CDC40_HepG2_rep01	0.0598474	0.0542656
chr6	141169773	141169873	SAFB_HepG2_rep02	0.020789	0.0520372
chr6	141169773	141169873	SAFB_HepG2_rep02	0.020789	0.0520372
chr6	141173568	141173602	HNRNPUL1_HepG2_rep02	0.354505	0.0496546
chr6	141173568	141173602	HNRNPUL1_HepG2_rep02	0.354505	0.0496546
chr6	141172313	141172342	QKI_HepG2_rep01	0.106418	0.0482546
chr6	141172313	141172342	QKI_HepG2_rep01	0.106418	0.0482546
chr6	141173878	141173896	MATR3_HepG2_rep01	0.167821	0.0396053
chr6	141173878	141173896	MATR3_HepG2_rep01	0.167821	0.0396053
chr6	141167714	141167784	LARP4_HepG2_rep01	0.358092	0.0395387
chr6	141167714	141167784	LARP4_HepG2_rep01	0.358092	0.0395387
chr6	141167575	141167637	ZNF800_HepG2_rep01	0.139627	0.0381188
chr6	141167575	141167637	ZNF800_HepG2_rep01	0.139627	0.0381188
chr6	141173728	141173769	XRN2_HepG2_rep01	0.112345	0.0339569
chr6	141173728	141173769	XRN2_HepG2_rep01	0.112345	0.0339569
chr6	141173595	141173655	HNRNPU_HepG2_rep02	0.121285	0.0305189
chr6	141173595	141173655	HNRNPU_HepG2_rep02	0.121285	0.0305189
chr6	141173954	141173999	GRWD1_HepG2_rep02	0.199048	0.0255252
chr6	141173954	141173999	GRWD1_HepG2_rep02	0.199048	0.0255252
chr6	141170770	141170821	DHX30_HepG2_rep01	0.127691	0.0223998
chr6	141170770	141170821	DHX30_HepG2_rep01	0.127691	0.0223998
chr6	141169057	141169092	TROVE2_HepG2_rep01	0.213466	0.0212627
chr6	141169057	141169092	TROVE2_HepG2_rep01	0.213466	0.0212627
chr6	141169839	141169884	RBM5_HepG2_rep01	0.17887	0.019256
chr6	141169839	141169884	RBM5_HepG2_rep01	0.17887	0.019256
chr6	141169732	141169784	EIF3D_HepG2_rep01	0.272711	0.0183898
chr6	141169732	141169784	EIF3D_HepG2_rep01	0.272711	0.0183898
chr6	141167635	141167689	ZC3H11A_HepG2_rep01	0.106643	0.0173173
chr6	141167635	141167689	ZC3H11A_HepG2_rep01	0.106643	0.0173173
chr6	141173735	141173780	HNRNPU_HepG2_rep02	0.246816	0.0161212
chr6	141173735	141173780	HNRNPU_HepG2_rep02	0.246816	0.0161212
chr6	141168620	141168652	HNRNPL_HepG2_rep01	0.109895	0.00990101
chr6	141168620	141168652	HNRNPL_HepG2_rep01	0.109895	0.00990101
chr6	141173868	141173898	EIF3D_HepG2_rep01	0.179602	0.00853469
chr6	141173868	141173898	EIF3D_HepG2_rep01	0.179602	0.00853469
chr6	141172580	141172609	HLTF_HepG2_rep01	0.169868	0.00516394
chr6	141172580	141172609	HLTF_HepG2_rep01	0.169868	0.00516394
chr6	141172337	141172353	HNRNPL_HepG2_rep02	0.142652	0.00132227
chr6	141172337	141172353	HNRNPL_HepG2_rep02	0.142652	0.00132227
chr6	141082984	141083020	HLTF_K562_rep01	-0.506517	0
chr6	141083026	141083039	SAFB2_K562_rep02	0.554238	0
chr6	141167121	141167162	TIA1_HepG2_rep02	0.821045	0
chr6	141167131	141167157	CSTF2T_K562_rep02	-0.22633	0
chr6	141167139	141167153	DGCR8_HepG2_rep01	-0.0342888	0
chr6	141167261	141167266	DROSHA_HepG2_rep01	-0.395687	0
chr6	141167262	141167307	IGF2BP3_HepG2_rep01	-1.11509	0
chr6	141167267	141167300	U2AF2_K562_rep01	-0.729812	0
chr6	141167271	141167305	MTPAP_K562_rep01	0.519846	0
chr6	141167273	141167306	IGF2BP3_HepG2_rep02	-0.585936	0
chr6	141167284	141167318	CSTF2T_HepG2_rep02	-0.420718	0
chr6	141167321	141167329	TIA1_HepG2_rep01	0.226507	0
chr6	141167332	141167354	GRWD1_HepG2_rep01	0.154223	0
chr6	141167340	141167344	ILF3_HepG2_rep02	0.225054	0
chr6	141167342	141167388	PRPF8_HepG2_rep01	0.0183833	0
chr6	141167355	141167389	HLTF_K562_rep01	-0.506517	0
chr6	141167386	141167434	CSTF2T_K562_rep02	-0.396255	0
chr6	141167393	141167416	SAFB2_K562_rep01	0.798846	0
chr6	141167399	141167434	SRSF1_HepG2_rep01	-1.10014	0
chr6	141167401	141167438	DROSHA_HepG2_rep02	-0.442837	0
chr6	141167402	141167445	RBM5_HepG2_rep01	-0.0435229	0
chr6	141167403	141167447	HNRNPC_K562_rep02	0.0343465	0
chr6	141167404	141167435	LARP4_HepG2_rep02	-0.0880803	0
chr6	141167404	141167457	TROVE2_HepG2_rep01	-0.512969	0
chr6	141167407	141167449	BUD13_HepG2_rep01	-0.60339	0
chr6	141167408	141167453	DHX30_HepG2_rep01	-0.550381	0
chr6	141167408	141167433	U2AF2_K562_rep02	0.299324	0
chr6	141167409	141167446	NKRF_HepG2_rep02	-0.964173	0
chr6	141167410	141167436	SUGP2_HepG2_rep02	-1.99865	0
chr6	141167411	141167449	RBM5_HepG2_rep02	-1.00509	0
chr6	141167412	141167432	EFTUD2_HepG2_rep01	-1.4102	0
chr6	141167414	141167439	ZC3H11A_HepG2_rep02	-0.802558	0
chr6	141167415	141167447	CSTF2_HepG2_rep01	0.362425	0
chr6	141167416	141167437	LIN28B_HepG2_rep01	-0.680647	0
chr6	141167417	141167438	HNRNPU_HepG2_rep01	-0.456228	0
chr6	141167419	141167437	ILF3_HepG2_rep01	-1.47372	0
chr6	141167421	141167451	U2AF1_HepG2_rep01	-0.16947	0
chr6	141167421	141167451	ILF3_HepG2_rep02	0.377057	0
chr6	141167421	141167449	PTBP1_HepG2_rep01	-0.909389	0
chr6	141167422	141167442	SSB_HepG2_rep01	0.102242	0
chr6	141167424	141167433	EIF3D_HepG2_rep01	-0.598006	0
chr6	141167425	141167448	RBM15_HepG2_rep01	-0.483137	0
chr6	141167427	141167443	AGGF1_HepG2_rep02	-1.4978	0
chr6	141167435	141167444	DGCR8_HepG2_rep01	-0.0342888	0
chr6	141167488	141167498	LSM11_HepG2_rep01	0.773157	0
chr6	141167505	141167538	FUS_K562_rep01	0.775241	0
chr6	141167565	141167598	SRSF1_HepG2_rep01	-0.685102	0
chr6	141167587	141167606	MATR3_HepG2_rep02	-0.270153	0
chr6	141167587	141167642	PTBP1_HepG2_rep01	-0.58746	0
chr6	141167587	141167612	SSB_HepG2_rep01	0.102242	0
chr6	141167594	141167656	SRSF1_HepG2_rep02	0.226998	0
chr6	141167602	141167647	XRN2_HepG2_rep01	-0.150689	0
chr6	141167606	141167660	HNRNPU_HepG2_rep01	-0.778156	0
chr6	141167610	141167657	U2AF1_HepG2_rep01	-0.210112	0
chr6	141167610	141167669	UCHL5_HepG2_rep01	-0.462591	0
chr6	141167610	141167668	CSTF2T_HepG2_rep01	-0.668588	0
chr6	141167611	141167653	SRSF1_HepG2_rep01	0.162895	0
chr6	141167613	141167650	RBFOX2_HepG2_rep02	-0.147588	0
chr6	141167614	141167643	U2AF1_HepG2_rep02	-0.352676	0
chr6	141167618	141167643	CSTF2T_HepG2_rep02	-1.42072	0
chr6	141167621	141167646	TROVE2_HepG2_rep01	-0.834897	0
chr6	141167623	141167665	TAF15_HepG2_rep01	-0.134415	0
chr6	141167627	141167672	FUS_HepG2_rep01	0.391387	0
chr6	141167627	141167668	EIF3D_HepG2_rep01	-0.890788	0
chr6	141167630	141167684	EIF3D_HepG2_rep02	-1.16692	0
chr6	141167637	141167661	NOLC1_K562_rep02	0.786182	0
chr6	141167641	141167659	SAFB2_K562_rep02	-0.445762	0
chr6	141167664	141167710	PPIL4_K562_rep01	-0.0281595	0
chr6	141167675	141167678	AGGF1_HepG2_rep02	-0.690441	0
chr6	141167676	141167720	CSTF2_HepG2_rep02	0.2703	0
chr6	141167679	141167751	UCHL5_HepG2_rep02	-0.655677	0
chr6	141167684	141167708	DROSHA_HepG2_rep02	-0.0684418	0
chr6	141167684	141167716	GRSF1_HepG2_rep01	-0.413095	0
chr6	141167688	141167717	PPIL4_K562_rep02	0.62519	0
chr6	141167778	141167812	TAF15_HepG2_rep02	-0.361524	0
chr6	141167778	141167814	ILF3_HepG2_rep02	-0.359909	0
chr6	141167823	141167846	HNRNPL_K562_rep01	-0.223339	0
chr6	141167828	141167837	SAFB2_K562_rep02	0.554238	0
chr6	141167837	141167866	EFTUD2_HepG2_rep01	0.0752275	0
chr6	141167841	141167855	UCHL5_HepG2_rep01	-1.33706	0
chr6	141167847	141167868	KHDRBS1_K562_rep02	-0.857951	0
chr6	141167887	141167933	SAFB2_K562_rep02	-0.293759	0
chr6	141167890	141167928	SFPQ_HepG2_rep01	-0.0439809	0
chr6	141167890	141167923	TAF15_K562_rep02	0.575971	0
chr6	141167895	141167925	U2AF1_HepG2_rep01	-0.602429	0
chr6	141167900	141167926	KHDRBS1_K562_rep02	-0.272989	0
chr6	141167902	141167928	CSTF2_HepG2_rep01	-0.0526121	0
chr6	141167906	141167917	LARP4_HepG2_rep02	0.104565	0
chr6	141167906	141167928	CSTF2_HepG2_rep02	-0.144737	0
chr6	141167909	141167932	DROSHA_HepG2_rep02	-0.483479	0
chr6	141167910	141167927	UCHL5_HepG2_rep01	-0.0151319	0
chr6	141167971	141167998	TIA1_HepG2_rep02	-0.178955	0
chr6	141167977	141168008	U2AF1_HepG2_rep01	-0.0174668	0
chr6	141167981	141168031	MATR3_HepG2_rep01	-0.0952134	0
chr6	141167983	141168010	KHDRBS1_K562_rep02	0.727011	0
chr6	141167983	141168005	RBFOX2_K562_rep01	0.0551131	0
chr6	141167993	141168012	RBM5_HepG2_rep02	-0.0050903	0
chr6	141168119	141168158	TBRG4_K562_rep02	0.312022	0
chr6	141168135	141168149	QKI_HepG2_rep02	-0.00866648	0
chr6	141168272	141168297	HNRNPA1_HepG2_rep01	-0.82017	0
chr6	141168273	141168284	HNRNPU_K562_rep02	-0.426413	0
chr6	141168275	141168295	TAF15_HepG2_rep01	-0.30434	0
chr6	141168493	141168534	CSTF2_HepG2_rep01	0.947388	0
chr6	141168495	141168506	HNRNPA1_HepG2_rep02	-0.212578	0
chr6	141168495	141168517	HNRNPA1_HepG2_rep01	0.17983	0
chr6	141168506	141168531	TROVE2_HepG2_rep01	-0.134458	0
chr6	141168507	141168538	UCHL5_HepG2_rep01	-0.33706	0
chr6	141168521	141168544	TIA1_HepG2_rep02	-0.178955	0
chr6	141168523	141168535	CDC40_HepG2_rep01	-0.677118	0
chr6	141168524	141168540	SAFB_HepG2_rep02	0.310296	0
chr6	141168581	141168607	HNRNPA1_HepG2_rep02	0.524387	0
chr6	141168583	141168626	HNRNPU_K562_rep01	-0.745536	0
chr6	141168599	141168664	KHSRP_K562_rep01	-0.27264	0
chr6	141168623	141168662	TROVE2_HepG2_rep01	-0.397492	0
chr6	141168627	141168640	EIF3D_HepG2_rep01	-0.990323	0
chr6	141168628	141168652	TIA1_HepG2_rep02	-0.178955	0
chr6	141168628	141168654	MTPAP_K562_rep01	0.519846	0
chr6	141168639	141168651	U2AF2_HepG2_rep01	-0.0321844	0
chr6	141168642	141168661	RBM5_HepG2_rep01	0.371515	0
chr6	141168694	141168719	EIF3D_HepG2_rep01	-0.727289	0
chr6	141168725	141168817	DROSHA_HepG2_rep01	-0.395687	0
chr6	141168738	141168790	DGCR8_HepG2_rep01	-0.0342888	0
chr6	141168741	141168787	SRSF1_K562_rep02	-0.357305	0
chr6	141168749	141168831	RBFOX2_K562_rep01	-0.944887	0
chr6	141168750	141168790	BCLAF1_HepG2_rep01	0.00606437	0
chr6	141168751	141168786	CSTF2T_HepG2_rep01	-0.475943	0
chr6	141168760	141168774	SUGP2_HepG2_rep02	-1.12793	0
chr6	141168763	141168804	TROVE2_HepG2_rep02	0.0931964	0
chr6	141168764	141168784	HNRNPA1_HepG2_rep02	-1.3825	0
chr6	141168770	141168814	HNRNPA1_HepG2_rep01	-0.945701	0
chr6	141168771	141168814	RBM5_HepG2_rep02	-1.81245	0
chr6	141168784	141168810	SAFB2_K562_rep01	-0.786116	0
chr6	141168784	141168822	LARP4_HepG2_rep01	-1.48991	0
chr6	141168828	141168845	CDC40_HepG2_rep01	-0.618224	0
chr6	141168842	141168861	HNRNPC_HepG2_rep02	0.204202	0
chr6	141168875	141168915	KHSRP_K562_rep02	0.320917	0
chr6	141168893	141168919	KHSRP_K562_rep01	0.049288	0
chr6	141168961	141168987	XRCC6_HepG2_rep01	0.238186	0
chr6	141168962	141168996	FASTKD2_HepG2_rep01	-0.218113	0
chr6	141168964	141169010	SND1_K562_rep02	0.295392	0
chr6	141168968	141169015	HNRNPU_HepG2_rep02	0.0541708	0
chr6	141168968	141169006	SFPQ_HepG2_rep01	0.277947	0
chr6	141168968	141169049	U2AF1_HepG2_rep01	0.204926	0
chr6	141168977	141169002	SRSF1_K562_rep02	0.81262	0
chr6	141168977	141169001	KHSRP_K562_rep02	-0.00101077	0
chr6	141168980	141168990	HNRNPL_K562_rep02	-0.507821	0
chr6	141168993	141169025	FUBP3_HepG2_rep01	-0.246782	0
chr6	141168993	141169046	POLR2G_HepG2_rep01	0.0159306	0
chr6	141168997	141169059	HNRNPU_K562_rep02	-1.28891	0
chr6	141168998	141169066	LSM11_HepG2_rep01	-0.489877	0
chr6	141168998	141169068	EIF3D_HepG2_rep01	-0.874846	0
chr6	141169000	141169041	XRN2_HepG2_rep01	-0.472617	0
chr6	141169008	141169046	HNRNPC_HepG2_rep01	-0.10757	0
chr6	141169009	141169063	HNRNPL_K562_rep01	-0.393264	0
chr6	141169013	141169052	TAF15_HepG2_rep02	-0.139132	0
chr6	141169013	141169056	SAFB_K562_rep01	0.400152	0
chr6	141169015	141169053	TIA1_K562_rep01	0.030758	0
chr6	141169017	141169052	NKRF_HepG2_rep02	-0.935027	0
chr6	141169017	141169029	UCHL5_HepG2_rep01	-2.33706	0
chr6	141169018	141169059	AGGF1_HepG2_rep01	-0.56627	0
chr6	141169019	141169059	RBM15_HepG2_rep01	-0.483137	0
chr6	141169022	141169056	HNRNPU_HepG2_rep01	-0.515121	0
chr6	141169023	141169044	HNRNPK_HepG2_rep01	-1.46428	0
chr6	141169024	141169060	HNRNPL_K562_rep02	-0.414712	0
chr6	141169026	141169043	DGCR8_HepG2_rep01	-0.619251	0
chr6	141169033	141169064	CSTF2_HepG2_rep01	-1.22254	0
chr6	141169034	141169047	CSTF2_HepG2_rep02	-1.31466	0
chr6	141169034	141169102	EIF3D_HepG2_rep02	-1.38932	0
chr6	141169085	141169109	KHSRP_K562_rep02	-0.00101077	0
chr6	141169088	141169093	TAF15_HepG2_rep01	-0.134415	0
chr6	141169089	141169109	HNRNPU_HepG2_rep01	0.543772	0
chr6	141169101	141169110	AGGF1_HepG2_rep01	0.0186924	0
chr6	141169230	141169274	SAFB_K562_rep02	0.824896	0
chr6	141169236	141169270	HNRNPU_K562_rep01	0.254464	0
chr6	141169237	141169270	HNRNPU_K562_rep02	0.743512	0
chr6	141169241	141169263	TAF15_HepG2_rep01	-0.719377	0
chr6	141169242	141169250	QKI_HepG2_rep02	-0.00866648	0
chr6	141169243	141169264	DROSHA_HepG2_rep02	-0.0684418	0
chr6	141169250	141169270	AGGF1_HepG2_rep02	0.309559	0
chr6	141169253	141169273	HNRNPA1_HepG2_rep01	-0.0128151	0
chr6	141169255	141169276	GRWD1_HepG2_rep01	-1.58274	0
chr6	141169277	141169318	LSM11_HepG2_rep01	0.188195	0
chr6	141169352	141169394	SAFB2_K562_rep02	0.969275	0
chr6	141169368	141169400	AKAP1_HepG2_rep02	0.341611	0
chr6	141169407	141169426	TROVE2_HepG2_rep01	-0.304383	0
chr6	141169410	141169420	HNRNPU_K562_rep02	0.158549	0
chr6	141169440	141169484	CSTF2_HepG2_rep01	-0.0526121	0
chr6	141169455	141169474	QKI_HepG2_rep01	0.276343	0
chr6	141169635	141169658	SAFB2_K562_rep02	0.554238	0
chr6	141169651	141169683	HNRNPA1_K562_rep01	-0.67375	0
chr6	141169671	141169681	HNRNPL_K562_rep02	-0.507821	0
chr6	141169721	141169756	DGCR8_HepG2_rep01	-0.204214	0
chr6	141169721	141169726	CSTF2T_HepG2_rep01	-0.0609052	0
chr6	141169722	141169763	HNRNPA1_HepG2_rep01	0.88027	0
chr6	141169725	141169758	ZC3H11A_HepG2_rep01	-0.0308606	0
chr6	141169726	141169763	CSTF2T_HepG2_rep01	-0.154015	0
chr6	141169727	141169756	HNRNPU_HepG2_rep02	-0.431256	0
chr6	141169728	141169746	TAF15_HepG2_rep02	-0.209521	0
chr6	141169728	141169758	HNRNPA1_K562_rep01	0.741288	0
chr6	141169730	141169753	U2AF2_HepG2_rep02	0.206039	0
chr6	141169764	141169814	POLR2G_HepG2_rep02	0.121737	0
chr6	141169769	141169796	HNRNPU_K562_rep02	-1.20402	0
chr6	141169786	141169819	CSTF2_HepG2_rep01	-0.900609	0
chr6	141169794	141169822	TAF15_HepG2_rep02	-0.302631	0
chr6	141169832	141169885	DGCR8_HepG2_rep01	-0.356217	0
chr6	141169837	141169839	FUS_HepG2_rep02	0.117359	0
chr6	141169848	141169893	CSTF2_HepG2_rep02	0.492693	0
chr6	141169851	141169900	LSM11_HepG2_rep01	-0.811805	0
chr6	141169855	141169892	UCHL5_K562_rep02	-0.394438	0
chr6	141169912	141169935	NOLC1_K562_rep02	0.786182	0
chr6	141169927	141169955	CSTF2_HepG2_rep02	-0.314662	0
chr6	141169936	141169962	DGCR8_HepG2_rep02	-0.616991	0
chr6	141169946	141169959	KHDRBS1_K562_rep02	0.311974	0
chr6	141169957	141169964	CSTF2_HepG2_rep01	-1.63757	0
chr6	141169995	141170047	FUS_K562_rep02	0.787406	0
chr6	141170003	141170028	HNRNPA1_HepG2_rep02	0.524387	0
chr6	141170010	141170039	HNRNPA1_HepG2_rep01	0.349755	0
chr6	141170015	141170042	TIAL1_HepG2_rep02	0.375121	0
chr6	141170030	141170064	KHDRBS1_K562_rep02	-0.536023	0
chr6	141170035	141170047	DDX52_HepG2_rep01	0.256551	0
chr6	141170035	141170053	SUGP2_HepG2_rep01	-1.0642	0
chr6	141170043	141170046	HNRNPC_HepG2_rep01	-0.370605	0
chr6	141170103	141170122	TAF15_HepG2_rep02	-0.946487	0
chr6	141170106	141170113	DGCR8_HepG2_rep01	0.965711	0
chr6	141170107	141170149	DHX30_HepG2_rep01	0.127691	0
chr6	141170110	141170163	SSB_HepG2_rep01	0.839208	0
chr6	141170114	141170169	U2AF2_K562_rep02	0.936754	0
chr6	141170116	141170137	GRWD1_HepG2_rep02	-1.53792	0
chr6	141170117	141170158	DROSHA_HepG2_rep02	-0.127336	0
chr6	141170118	141170168	KHSRP_K562_rep01	-0.143357	0
chr6	141170125	141170167	TIA1_HepG2_rep02	0.236082	0
chr6	141170127	141170167	UPF1_HepG2_rep01	0.169393	0
chr6	141170128	141170150	ZC3H11A_HepG2_rep01	-0.878858	0
chr6	141170128	141170138	SSB_HepG2_rep02	0.352072	0
chr6	141170129	141170167	TIA1_HepG2_rep01	0.963473	0
chr6	141170131	141170167	MATR3_HepG2_rep01	0.319824	0
chr6	141170134	141170166	U2AF2_HepG2_rep02	-0.22692	0
chr6	141170138	141170169	SSB_HepG2_rep02	0.352072	0
chr6	141170265	141170282	SFPQ_HepG2_rep01	-0.780946	0
chr6	141170323	141170350	TROVE2_HepG2_rep01	-0.134458	0
chr6	141170329	141170348	TROVE2_HepG2_rep02	-0.491766	0
chr6	141170357	141170377	PABPN1_HepG2_rep01	0.443701	0
chr6	141170399	141170446	EIF3D_HepG2_rep01	-1.05744	0
chr6	141170400	141170427	DKC1_HepG2_rep02	-0.200492	0
chr6	141170400	141170438	XRN2_HepG2_rep01	0.112345	0
chr6	141170403	141170456	U2AF1_HepG2_rep02	0.0623612	0
chr6	141170405	141170439	FAM120A_HepG2_rep01	-0.657294	0
chr6	141170406	141170454	HNRNPU_HepG2_rep02	-0.267757	0
chr6	141170408	141170434	DGCR8_HepG2_rep02	-0.616991	0
chr6	141170413	141170440	HNRNPA1_K562_rep01	0.32625	0
chr6	141170420	141170444	TIA1_HepG2_rep01	-0.773493	0
chr6	141170420	141170452	NCBP2_HepG2_rep02	-0.276298	0
chr6	141170421	141170436	SAFB_K562_rep01	0.81519	0
chr6	141170426	141170498	GRWD1_HepG2_rep01	-1.72025	0
chr6	141170437	141170470	LSM11_HepG2_rep01	-1.39677	0
chr6	141170596	141170638	ILF3_K562_rep01	-0.13886	0
chr6	141170600	141170632	HNRNPU_HepG2_rep02	0.246816	0
chr6	141170600	141170608	SUGP2_HepG2_rep01	-2.35371	0
chr6	141170601	141170641	DGCR8_HepG2_rep01	-0.882286	0
chr6	141170601	141170645	SAFB_K562_rep01	0.400152	0
chr6	141170603	141170622	DHX30_HepG2_rep01	-0.665858	0
chr6	141170605	141170641	HNRNPU_K562_rep01	-0.423608	0
chr6	141170605	141170641	DROSHA_HepG2_rep02	-0.583015	0
chr6	141170607	141170639	HNRNPU_K562_rep02	-0.426413	0
chr6	141170608	141170646	RBM5_HepG2_rep01	-0.0435229	0
chr6	141170612	141170633	NKRF_HepG2_rep02	-0.0345624	0
chr6	141170615	141170622	ZC3H11A_HepG2_rep02	-0.802558	0
chr6	141170615	141170642	CDC40_HepG2_rep01	-1.11008	0
chr6	141170617	141170646	CSTF2_HepG2_rep02	-1.31466	0
chr6	141170618	141170648	EIF3D_HepG2_rep01	-0.727289	0
chr6	141170629	141170671	EIF3D_HepG2_rep02	-0.488852	0
chr6	141170735	141170815	XPO5_HepG2_rep01	-0.0951582	0
chr6	141170738	141170749	HNRNPA1_HepG2_rep02	-0.797541	0
chr6	141170758	141170809	HNRNPU_K562_rep01	0.839426	0
chr6	141170759	141170803	UCHL5_HepG2_rep01	-2.33706	0
chr6	141170769	141170804	HNRNPC_HepG2_rep02	-0.117726	0
chr6	141170775	141170812	RBM5_HepG2_rep02	-1.59005	0
chr6	141170778	141170813	ZC3H11A_HepG2_rep01	-0.682937	0
chr6	141170778	141170814	LARP4_HepG2_rep01	-0.712297	0
chr6	141170778	141170815	HNRNPU_K562_rep02	0.895515	0
chr6	141170779	141170819	HNRNPC_K562_rep01	0.235801	0
chr6	141170780	141170814	DGCR8_HepG2_rep02	-0.786916	0
chr6	141170788	141170812	EIF3D_HepG2_rep01	-1.57529	0
chr6	141170789	141170796	HNRNPL_K562_rep02	0.492179	0
chr6	141170796	141170803	DROSHA_HepG2_rep02	-0.0684418	0
chr6	141170817	141170822	CDC40_HepG2_rep01	0.0598474	0
chr6	141170840	141170865	PPIL4_K562_rep02	0.62519	0
chr6	141170888	141170943	RBM5_HepG2_rep01	-0.0435229	0
chr6	141170906	141170918	DROSHA_HepG2_rep02	-0.805407	0
chr6	141170926	141170947	GRWD1_HepG2_rep01	-1.58274	0
chr6	141170984	141171010	HNRNPK_HepG2_rep02	0.288978	0
chr6	141170988	141171000	HNRNPU_K562_rep02	-0.619059	0
chr6	141171115	141171146	KHSRP_K562_rep02	0.583952	0
chr6	141171141	141171178	TIA1_HepG2_rep02	0.236082	0
chr6	141171171	141171210	SAFB_K562_rep02	0.824896	0
chr6	141171194	141171200	HNRNPL_K562_rep02	0.492179	0
chr6	141171247	141171279	KHDRBS1_K562_rep01	0.48657	0
chr6	141171310	141171352	HNRNPL_K562_rep02	0.129609	0
chr6	141171328	141171368	LSM11_HepG2_rep01	0.188195	0
chr6	141171416	141171444	HNRNPK_HepG2_rep01	0.120687	0
chr6	141171449	141171478	GTF2F1_HepG2_rep01	-0.408921	0
chr6	141171465	141171478	SAFB_HepG2_rep02	0.117651	0
chr6	141171519	141171543	MATR3_HepG2_rep01	-0.0952134	0
chr6	141171594	141171629	HNRNPA1_HepG2_rep01	0.639262	0
chr6	141171613	141171664	RBFOX2_K562_rep01	0.277506	0
chr6	141171615	141171640	TAF15_HepG2_rep01	-1.04131	0
chr6	141171615	141171657	SUGP2_HepG2_rep01	-1.5667	0
chr6	141171616	141171667	NKRF_HepG2_rep02	-0.256955	0
chr6	141171616	141171657	UCHL5_HepG2_rep01	-1.11467	0
chr6	141171633	141171666	HNRNPL_HepG2_rep02	-0.039939	0
chr6	141171645	141171667	TAF15_HepG2_rep02	-0.887593	0
chr6	141171645	141171691	FUS_K562_rep02	0.465478	0
chr6	141171691	141171735	HNRNPA1_HepG2_rep01	-0.597778	0
chr6	141171698	141171725	HNRNPU_HepG2_rep02	0.246816	0
chr6	141171702	141171724	MATR3_HepG2_rep02	0.051775	0
chr6	141171704	141171717	TAF15_HepG2_rep02	-0.302631	0
chr6	141171730	141171777	ZC3H11A_HepG2_rep02	-0.102118	0
chr6	141171734	141171764	PABPN1_HepG2_rep01	0.273776	0
chr6	141171736	141171769	SUGP2_HepG2_rep02	-1.19505	0
chr6	141171739	141171748	POLR2G_HepG2_rep01	0.278965	0
chr6	141171751	141171794	RBM5_HepG2_rep01	-0.195526	0
chr6	141171752	141171787	KHDRBS1_K562_rep02	-0.272989	0
chr6	141171752	141171783	HNRNPA1_K562_rep01	-0.258712	0
chr6	141171753	141171785	HNRNPA1_HepG2_rep02	0.787422	0
chr6	141171756	141171788	SUPV3L1_HepG2_rep02	-0.11871	0
chr6	141171769	141171805	UCHL5_HepG2_rep02	-1.07071	0
chr6	141171775	141171825	HNRNPU_HepG2_rep02	0.0541708	0
chr6	141171802	141171838	FUS_HepG2_rep01	0.490923	0
chr6	141171806	141171838	RBM22_HepG2_rep02	-0.911953	0
chr6	141171813	141171832	MATR3_HepG2_rep02	0.051775	0
chr6	141171815	141171853	LSM11_HepG2_rep01	-0.396768	0
chr6	141171929	141171981	RBFOX2_K562_rep02	-0.0742331	0
chr6	141171936	141171966	HNRNPA1_HepG2_rep01	0.639262	0
chr6	141171938	141171953	HNRNPU_K562_rep02	-0.619059	0
chr6	141171945	141171971	DGCR8_HepG2_rep01	-1.03429	0
chr6	141171947	141171975	BCLAF1_HepG2_rep02	0.347257	0
chr6	141171953	141171979	FUS_K562_rep02	0.0504402	0
chr6	141172021	141172070	HNRNPU_K562_rep01	-0.523144	0
chr6	141172067	141172092	SAFB2_K562_rep01	-0.786116	0
chr6	141172077	141172096	HNRNPU_K562_rep02	-1.20402	0
chr6	141172091	141172095	HNRNPU_HepG2_rep01	0.221844	0
chr6	141172108	141172134	NKRF_HepG2_rep02	-0.771528	0
chr6	141172110	141172144	GRWD1_HepG2_rep01	-1.26081	0
chr6	141172128	141172154	HNRNPL_K562_rep02	-0.677746	0
chr6	141172133	141172167	RBM5_HepG2_rep02	-1.17502	0
chr6	141172139	141172176	HNRNPA1_HepG2_rep01	-0.11973	0
chr6	141172140	141172155	HNRNPL_HepG2_rep01	-0.752601	0
chr6	141172150	141172165	HNRNPU_HepG2_rep02	-0.338147	0
chr6	141172155	141172175	HNRNPA1_HepG2_rep02	-0.475613	0
chr6	141172254	141172280	HNRNPU_HepG2_rep02	-0.338147	0
chr6	141172254	141172336	LARP4_HepG2_rep01	-0.226871	0
chr6	141172259	141172309	AGGF1_HepG2_rep02	0.0465244	0
chr6	141172264	141172307	AKAP1_HepG2_rep02	0.171686	0
chr6	141172276	141172329	CSTF2T_HepG2_rep01	-0.797871	0
chr6	141172300	141172358	CSTF2_HepG2_rep01	-0.0526121	0
chr6	141172301	141172382	EIF3D_HepG2_rep01	-0.0574376	0
chr6	141172303	141172357	HNRNPU_K562_rep01	0.0618186	0
chr6	141172308	141172362	TIA1_HepG2_rep01	0.963473	0
chr6	141172315	141172336	DROSHA_HepG2_rep02	-0.220445	0
chr6	141172318	141172349	FXR1_K562_rep02	-0.639031	0
chr6	141172319	141172360	CSTF2_HepG2_rep02	0.00726573	0
chr6	141172319	141172332	HNRNPL_K562_rep02	-0.507821	0
chr6	141172319	141172361	CSTF2T_HepG2_rep02	-0.742646	0
chr6	141172320	141172338	QKI_HepG2_rep02	0.143337	0
chr6	141172324	141172366	HNRNPU_K562_rep02	0.158549	0
chr6	141172329	141172365	HNRNPA1_K562_rep01	-0.258712	0
chr6	141172330	141172349	HNRNPC_HepG2_rep01	-0.718528	0
chr6	141172330	141172358	RBM5_HepG2_rep02	-0.327018	0
chr6	141172338	141172358	NCBP2_HepG2_rep01	-0.878714	0
chr6	141172339	141172381	HNRNPUL1_HepG2_rep01	-0.0273259	0
chr6	141172342	141172383	NKRF_HepG2_rep02	-0.642245	0
chr6	141172343	141172374	HNRNPUL1_K562_rep02	0.972429	0
chr6	141172486	141172506	POLR2G_HepG2_rep01	0.278965	0
chr6	141172566	141172604	SAFB2_K562_rep02	-0.0307247	0
chr6	141172575	141172588	HNRNPL_K562_rep01	0.776661	0
chr6	141172731	141172805	U2AF2_K562_rep02	0.129399	0
chr6	141172732	141172780	U2AF1_HepG2_rep01	0.567496	0
chr6	141172785	141172806	HNRNPL_K562_rep02	0.907216	0
chr6	141172874	141172895	KHSRP_K562_rep02	-0.585973	0
chr6	141172886	141172935	LARP4_HepG2_rep01	-0.583014	0
chr6	141172896	141172940	TIA1_HepG2_rep02	0.236082	0
chr6	141172897	141172934	HNRNPL_K562_rep02	-0.829749	0
chr6	141172905	141172946	HNRNPL_K562_rep01	-0.130229	0
chr6	141172909	141172944	AGGF1_K562_rep02	0.322429	0
chr6	141172987	141173033	TIA1_HepG2_rep02	0.55801	0
chr6	141173008	141173017	RBM5_HepG2_rep01	-0.780488	0
chr6	141173127	141173141	CSTF2_HepG2_rep02	0.2703	0
chr6	141173141	141173154	HNRNPU_K562_rep02	-2.42641	0
chr6	141173149	141173156	TIAL1_HepG2_rep01	0.00507878	0
chr6	141173172	141173182	DROSHA_HepG2_rep01	-0.395687	0
chr6	141173177	141173209	NKRF_HepG2_rep01	0.344641	0
chr6	141173179	141173223	CSTF2_HepG2_rep01	-0.637575	0
chr6	141173186	141173232	FASTKD2_HepG2_rep01	-0.388038	0
chr6	141173187	141173221	ILF3_HepG2_rep01	-0.151791	0
chr6	141173192	141173213	ZC3H11A_HepG2_rep02	-0.732169	0
chr6	141173195	141173242	SAFB2_K562_rep01	-0.201154	0
chr6	141173199	141173209	CSTF2_HepG2_rep02	0.2703	0
chr6	141173199	141173220	SUPV3L1_HepG2_rep01	-0.210069	0
chr6	141173200	141173235	GRWD1_HepG2_rep01	-2.30521	0
chr6	141173203	141173239	EIF3D_HepG2_rep02	-0.359569	0
chr6	141173206	141173233	EIF3D_HepG2_rep01	-0.405361	0
chr6	141173212	141173235	AGGF1_K562_rep02	0.492354	0
chr6	141173272	141173321	DDX59_HepG2_rep01	0.156207	0
chr6	141173272	141173299	HNRNPK_HepG2_rep01	-0.0492375	0
chr6	141173288	141173347	AGGF1_HepG2_rep01	0.0186924	0
chr6	141173291	141173300	HNRNPUL1_HepG2_rep02	-0.645495	0
chr6	141173295	141173320	CSTF2T_HepG2_rep01	-1.21291	0
chr6	141173295	141173314	GRWD1_HepG2_rep01	-2.06817	0
chr6	141173301	141173333	NCBP2_HepG2_rep01	0.443214	0
chr6	141173301	141173315	ILF3_HepG2_rep01	0.526281	0
chr6	141173313	141173334	HNRNPU_K562_rep01	-0.423608	0
chr6	141173343	141173405	HNRNPU_HepG2_rep01	-0.100084	0
chr6	141173376	141173394	HNRNPC_HepG2_rep02	0.204202	0
chr6	141173479	141173505	XRN2_HepG2_rep01	0.112345	0
chr6	141173488	141173523	IGF2BP3_HepG2_rep02	0.414064	0
chr6	141173561	141173591	PTBP1_HepG2_rep01	-0.00249797	0
chr6	141173592	141173623	HNRNPA1_HepG2_rep01	0.501758	0
chr6	141173600	141173643	HNRNPA1_HepG2_rep02	0.524387	0
chr6	141173606	141173651	RBM5_HepG2_rep02	0.409947	0
chr6	141173616	141173649	AGGF1_HepG2_rep01	0.170695	0
chr6	141173633	141173683	HNRNPA1_K562_rep01	-0.521746	0
chr6	141173667	141173693	NOLC1_K562_rep02	0.786182	0
chr6	141173671	141173696	UCHL5_HepG2_rep01	0.247902	0
chr6	141173677	141173705	PPIL4_K562_rep02	0.62519	0
chr6	141173679	141173735	FASTKD2_HepG2_rep01	-0.651072	0
chr6	141173688	141173717	HNRNPU_HepG2_rep02	-0.168222	0
chr6	141173697	141173730	SND1_HepG2_rep01	0.124523	0
chr6	141173697	141173738	CSTF2T_K562_rep02	-0.811293	0
chr6	141173700	141173760	LSM11_HepG2_rep02	-0.15095	0
chr6	141173703	141173748	AGGF1_HepG2_rep02	-1.08276	0
chr6	141173705	141173731	RBM22_HepG2_rep02	-0.233881	0
chr6	141173710	141173739	HNRNPA1_HepG2_rep02	-0.212578	0
chr6	141173717	141173779	CSTF2T_HepG2_rep02	-0.00568041	0
chr6	141173719	141173772	HNRNPC_HepG2_rep02	-0.143722	0
chr6	141173721	141173776	GRWD1_HepG2_rep02	-0.385915	0
chr6	141173729	141173787	UCHL5_HepG2_rep01	0.247902	0
chr6	141173730	141173803	DGCR8_HepG2_rep01	-0.981821	0
chr6	141173732	141173770	TIA1_HepG2_rep01	-0.62149	0
chr6	141173733	141173800	EIF3D_HepG2_rep02	-0.166924	0
chr6	141173734	141173767	FASTKD2_HepG2_rep02	-0.742228	0
chr6	141173735	141173784	LARP4_HepG2_rep01	-0.390369	0
chr6	141173735	141173783	U2AF1_HepG2_rep01	-0.432504	0
chr6	141173735	141173758	HNRNPU_HepG2_rep01	-0.515121	0
chr6	141173737	141173789	SRSF1_HepG2_rep01	-1.744	0
chr6	141173738	141173772	DHX30_HepG2_rep02	0.0656512	0
chr6	141173740	141173781	SRSF1_HepG2_rep02	-1.31732	0
chr6	141173740	141173772	SRSF9_HepG2_rep01	-0.0495642	0
chr6	141173741	141173774	DKC1_HepG2_rep02	-0.200492	0
chr6	141173741	141173795	HNRNPA1_HepG2_rep01	-0.157205	0
chr6	141173745	141173785	HNRNPU_K562_rep01	0.839426	0
chr6	141173748	141173768	SFPQ_HepG2_rep01	-0.628943	0
chr6	141173748	141173796	TIA1_HepG2_rep02	0.236082	0
chr6	141173756	141173771	DHX30_HepG2_rep01	0.034582	0
chr6	141173760	141173787	EIF3G_K562_rep02	0.929849	0
chr6	141173766	141173778	ILF3_HepG2_rep01	0.111243	0
chr6	141173774	141173793	HNRNPA1_HepG2_rep02	-0.475613	0
chr6	141173844	141173876	RBM5_HepG2_rep02	-0.327018	0
chr6	141173858	141173872	TIA1_HepG2_rep01	0.226507	0
chr6	141173858	141173875	DDX52_HepG2_rep02	0.110385	0
chr6	141173908	141173939	AGGF1_HepG2_rep01	-0.244342	0
chr6	141173914	141173938	EIF3D_HepG2_rep02	-0.751886	0
chr6	141173945	141173964	SRSF1_HepG2_rep01	0.162895	0
chr6	141173947	141173978	SRSF1_K562_rep01	0.509544	0
chr6	141173956	141173991	UCHL5_HepG2_rep01	0.122372	0
chr6	141173960	141173994	GRWD1_HepG2_rep01	-0.108812	0
chr6	141173960	141173998	GRWD1_K562_rep02	0.0691316	0
chr6	141173961	141173993	PPIG_HepG2_rep02	0.401097	0
chr6	141173962	141173995	KHDRBS1_K562_rep01	0.901608	0
chr6	141173963	141173983	HNRNPA1_HepG2_rep02	-0.475613	0
chr6	141173978	141173993	TIA1_K562_rep01	0.200683	0
chr6	141173995	141174024	FASTKD2_HepG2_rep01	-1.02547	0
chr6	141174010	141174026	LIN28B_K562_rep01	-0.390453	0
chr6	141174021	141174048	U2AF2_K562_rep01	-0.729812	0
chr6	141174022	141174050	HNRNPA1_HepG2_rep02	-0.627616	0
chr6	141174023	141174034	SAFB2_K562_rep01	-0.616191	0
chr6	141174027	141174038	XRN2_HepG2_rep01	-0.69501	0
chr6	141174034	141174055	FUBP3_HepG2_rep01	-0.0947789	0
chr6	141167121	141167162	TIA1_HepG2_rep02	0.821045	0
chr6	141167131	141167157	CSTF2T_K562_rep02	-0.22633	0
chr6	141167139	141167153	DGCR8_HepG2_rep01	-0.0342888	0
chr6	141167261	141167266	DROSHA_HepG2_rep01	-0.395687	0
chr6	141167262	141167307	IGF2BP3_HepG2_rep01	-1.11509	0
chr6	141167267	141167300	U2AF2_K562_rep01	-0.729812	0
chr6	141167271	141167305	MTPAP_K562_rep01	0.519846	0
chr6	141167273	141167306	IGF2BP3_HepG2_rep02	-0.585936	0
chr6	141167284	141167318	CSTF2T_HepG2_rep02	-0.420718	0
chr6	141167321	141167329	TIA1_HepG2_rep01	0.226507	0
chr6	141167332	141167354	GRWD1_HepG2_rep01	0.154223	0
chr6	141167340	141167344	ILF3_HepG2_rep02	0.225054	0
chr6	141167342	141167388	PRPF8_HepG2_rep01	0.0183833	0
chr6	141167355	141167389	HLTF_K562_rep01	-0.506517	0
chr6	141167386	141167434	CSTF2T_K562_rep02	-0.396255	0
chr6	141167393	141167416	SAFB2_K562_rep01	0.798846	0
chr6	141167399	141167434	SRSF1_HepG2_rep01	-1.10014	0
chr6	141167401	141167438	DROSHA_HepG2_rep02	-0.442837	0
chr6	141167402	141167445	RBM5_HepG2_rep01	-0.0435229	0
chr6	141167403	141167447	HNRNPC_K562_rep02	0.0343465	0
chr6	141167404	141167435	LARP4_HepG2_rep02	-0.0880803	0
chr6	141167404	141167457	TROVE2_HepG2_rep01	-0.512969	0
chr6	141167407	141167449	BUD13_HepG2_rep01	-0.60339	0
chr6	141167408	141167453	DHX30_HepG2_rep01	-0.550381	0
chr6	141167408	141167433	U2AF2_K562_rep02	0.299324	0
chr6	141167409	141167446	NKRF_HepG2_rep02	-0.964173	0
chr6	141167410	141167436	SUGP2_HepG2_rep02	-1.99865	0
chr6	141167411	141167449	RBM5_HepG2_rep02	-1.00509	0
chr6	141167412	141167432	EFTUD2_HepG2_rep01	-1.4102	0
chr6	141167414	141167439	ZC3H11A_HepG2_rep02	-0.802558	0
chr6	141167415	141167447	CSTF2_HepG2_rep01	0.362425	0
chr6	141167416	141167437	LIN28B_HepG2_rep01	-0.680647	0
chr6	141167417	141167438	HNRNPU_HepG2_rep01	-0.456228	0
chr6	141167419	141167437	ILF3_HepG2_rep01	-1.47372	0
chr6	141167421	141167451	U2AF1_HepG2_rep01	-0.16947	0
chr6	141167421	141167451	ILF3_HepG2_rep02	0.377057	0
chr6	141167421	141167449	PTBP1_HepG2_rep01	-0.909389	0
chr6	141167422	141167442	SSB_HepG2_rep01	0.102242	0
chr6	141167424	141167433	EIF3D_HepG2_rep01	-0.598006	0
chr6	141167425	141167448	RBM15_HepG2_rep01	-0.483137	0
chr6	141167427	141167443	AGGF1_HepG2_rep02	-1.4978	0
chr6	141167435	141167444	DGCR8_HepG2_rep01	-0.0342888	0
chr6	141167488	141167498	LSM11_HepG2_rep01	0.773157	0
chr6	141167505	141167538	FUS_K562_rep01	0.775241	0
chr6	141167565	141167598	SRSF1_HepG2_rep01	-0.685102	0
chr6	141167587	141167606	MATR3_HepG2_rep02	-0.270153	0
chr6	141167587	141167642	PTBP1_HepG2_rep01	-0.58746	0
chr6	141167587	141167612	SSB_HepG2_rep01	0.102242	0
chr6	141167594	141167656	SRSF1_HepG2_rep02	0.226998	0
chr6	141167602	141167647	XRN2_HepG2_rep01	-0.150689	0
chr6	141167606	141167660	HNRNPU_HepG2_rep01	-0.778156	0
chr6	141167610	141167657	U2AF1_HepG2_rep01	-0.210112	0
chr6	141167610	141167669	UCHL5_HepG2_rep01	-0.462591	0
chr6	141167610	141167668	CSTF2T_HepG2_rep01	-0.668588	0
chr6	141167611	141167653	SRSF1_HepG2_rep01	0.162895	0
chr6	141167613	141167650	RBFOX2_HepG2_rep02	-0.147588	0
chr6	141167614	141167643	U2AF1_HepG2_rep02	-0.352676	0
chr6	141167618	141167643	CSTF2T_HepG2_rep02	-1.42072	0
chr6	141167621	141167646	TROVE2_HepG2_rep01	-0.834897	0
chr6	141167623	141167665	TAF15_HepG2_rep01	-0.134415	0
chr6	141167627	141167672	FUS_HepG2_rep01	0.391387	0
chr6	141167627	141167668	EIF3D_HepG2_rep01	-0.890788	0
chr6	141167630	141167684	EIF3D_HepG2_rep02	-1.16692	0
chr6	141167637	141167661	NOLC1_K562_rep02	0.786182	0
chr6	141167641	141167659	SAFB2_K562_rep02	-0.445762	0
chr6	141167664	141167710	PPIL4_K562_rep01	-0.0281595	0
chr6	141167675	141167678	AGGF1_HepG2_rep02	-0.690441	0
chr6	141167676	141167720	CSTF2_HepG2_rep02	0.2703	0
chr6	141167679	141167751	UCHL5_HepG2_rep02	-0.655677	0
chr6	141167684	141167708	DROSHA_HepG2_rep02	-0.0684418	0
chr6	141167684	141167716	GRSF1_HepG2_rep01	-0.413095	0
chr6	141167688	141167717	PPIL4_K562_rep02	0.62519	0
chr6	141167778	141167812	TAF15_HepG2_rep02	-0.361524	0
chr6	141167778	141167814	ILF3_HepG2_rep02	-0.359909	0
chr6	141167823	141167846	HNRNPL_K562_rep01	-0.223339	0
chr6	141167828	141167837	SAFB2_K562_rep02	0.554238	0
chr6	141167837	141167866	EFTUD2_HepG2_rep01	0.0752275	0
chr6	141167841	141167855	UCHL5_HepG2_rep01	-1.33706	0
chr6	141167847	141167868	KHDRBS1_K562_rep02	-0.857951	0
chr6	141167887	141167933	SAFB2_K562_rep02	-0.293759	0
chr6	141167890	141167928	SFPQ_HepG2_rep01	-0.0439809	0
chr6	141167890	141167923	TAF15_K562_rep02	0.575971	0
chr6	141167895	141167925	U2AF1_HepG2_rep01	-0.602429	0
chr6	141167900	141167926	KHDRBS1_K562_rep02	-0.272989	0
chr6	141167902	141167928	CSTF2_HepG2_rep01	-0.0526121	0
chr6	141167906	141167917	LARP4_HepG2_rep02	0.104565	0
chr6	141167906	141167928	CSTF2_HepG2_rep02	-0.144737	0
chr6	141167909	141167932	DROSHA_HepG2_rep02	-0.483479	0
chr6	141167910	141167927	UCHL5_HepG2_rep01	-0.0151319	0
chr6	141167971	141167998	TIA1_HepG2_rep02	-0.178955	0
chr6	141167977	141168008	U2AF1_HepG2_rep01	-0.0174668	0
chr6	141167981	141168031	MATR3_HepG2_rep01	-0.0952134	0
chr6	141167983	141168010	KHDRBS1_K562_rep02	0.727011	0
chr6	141167983	141168005	RBFOX2_K562_rep01	0.0551131	0
chr6	141167993	141168012	RBM5_HepG2_rep02	-0.0050903	0
chr6	141168119	141168158	TBRG4_K562_rep02	0.312022	0
chr6	141168135	141168149	QKI_HepG2_rep02	-0.00866648	0
chr6	141168272	141168297	HNRNPA1_HepG2_rep01	-0.82017	0
chr6	141168273	141168284	HNRNPU_K562_rep02	-0.426413	0
chr6	141168275	141168295	TAF15_HepG2_rep01	-0.30434	0
chr6	141168493	141168534	CSTF2_HepG2_rep01	0.947388	0
chr6	141168495	141168506	HNRNPA1_HepG2_rep02	-0.212578	0
chr6	141168495	141168517	HNRNPA1_HepG2_rep01	0.17983	0
chr6	141168506	141168531	TROVE2_HepG2_rep01	-0.134458	0
chr6	141168507	141168538	UCHL5_HepG2_rep01	-0.33706	0
chr6	141168521	141168544	TIA1_HepG2_rep02	-0.178955	0
chr6	141168523	141168535	CDC40_HepG2_rep01	-0.677118	0
chr6	141168524	141168540	SAFB_HepG2_rep02	0.310296	0
chr6	141168581	141168607	HNRNPA1_HepG2_rep02	0.524387	0
chr6	141168583	141168626	HNRNPU_K562_rep01	-0.745536	0
chr6	141168599	141168664	KHSRP_K562_rep01	-0.27264	0
chr6	141168623	141168662	TROVE2_HepG2_rep01	-0.397492	0
chr6	141168627	141168640	EIF3D_HepG2_rep01	-0.990323	0
chr6	141168628	141168652	TIA1_HepG2_rep02	-0.178955	0
chr6	141168628	141168654	MTPAP_K562_rep01	0.519846	0
chr6	141168639	141168651	U2AF2_HepG2_rep01	-0.0321844	0
chr6	141168642	141168661	RBM5_HepG2_rep01	0.371515	0
chr6	141168694	141168719	EIF3D_HepG2_rep01	-0.727289	0
chr6	141168725	141168817	DROSHA_HepG2_rep01	-0.395687	0
chr6	141168738	141168790	DGCR8_HepG2_rep01	-0.0342888	0
chr6	141168741	141168787	SRSF1_K562_rep02	-0.357305	0
chr6	141168749	141168831	RBFOX2_K562_rep01	-0.944887	0
chr6	141168750	141168790	BCLAF1_HepG2_rep01	0.00606437	0
chr6	141168751	141168786	CSTF2T_HepG2_rep01	-0.475943	0
chr6	141168760	141168774	SUGP2_HepG2_rep02	-1.12793	0
chr6	141168763	141168804	TROVE2_HepG2_rep02	0.0931964	0
chr6	141168764	141168784	HNRNPA1_HepG2_rep02	-1.3825	0
chr6	141168770	141168814	HNRNPA1_HepG2_rep01	-0.945701	0
chr6	141168771	141168814	RBM5_HepG2_rep02	-1.81245	0
chr6	141168784	141168810	SAFB2_K562_rep01	-0.786116	0
chr6	141168784	141168822	LARP4_HepG2_rep01	-1.48991	0
chr6	141168828	141168845	CDC40_HepG2_rep01	-0.618224	0
chr6	141168842	141168861	HNRNPC_HepG2_rep02	0.204202	0
chr6	141168875	141168915	KHSRP_K562_rep02	0.320917	0
chr6	141168893	141168919	KHSRP_K562_rep01	0.049288	0
chr6	141168961	141168987	XRCC6_HepG2_rep01	0.238186	0
chr6	141168962	141168996	FASTKD2_HepG2_rep01	-0.218113	0
chr6	141168964	141169010	SND1_K562_rep02	0.295392	0
chr6	141168968	141169015	HNRNPU_HepG2_rep02	0.0541708	0
chr6	141168968	141169006	SFPQ_HepG2_rep01	0.277947	0
chr6	141168968	141169049	U2AF1_HepG2_rep01	0.204926	0
chr6	141168977	141169002	SRSF1_K562_rep02	0.81262	0
chr6	141168977	141169001	KHSRP_K562_rep02	-0.00101077	0
chr6	141168980	141168990	HNRNPL_K562_rep02	-0.507821	0
chr6	141168993	141169025	FUBP3_HepG2_rep01	-0.246782	0
chr6	141168993	141169046	POLR2G_HepG2_rep01	0.0159306	0
chr6	141168997	141169059	HNRNPU_K562_rep02	-1.28891	0
chr6	141168998	141169066	LSM11_HepG2_rep01	-0.489877	0
chr6	141168998	141169068	EIF3D_HepG2_rep01	-0.874846	0
chr6	141169000	141169041	XRN2_HepG2_rep01	-0.472617	0
chr6	141169008	141169046	HNRNPC_HepG2_rep01	-0.10757	0
chr6	141169009	141169063	HNRNPL_K562_rep01	-0.393264	0
chr6	141169013	141169052	TAF15_HepG2_rep02	-0.139132	0
chr6	141169013	141169056	SAFB_K562_rep01	0.400152	0
chr6	141169015	141169053	TIA1_K562_rep01	0.030758	0
chr6	141169017	141169052	NKRF_HepG2_rep02	-0.935027	0
chr6	141169017	141169029	UCHL5_HepG2_rep01	-2.33706	0
chr6	141169018	141169059	AGGF1_HepG2_rep01	-0.56627	0
chr6	141169019	141169059	RBM15_HepG2_rep01	-0.483137	0
chr6	141169022	141169056	HNRNPU_HepG2_rep01	-0.515121	0
chr6	141169023	141169044	HNRNPK_HepG2_rep01	-1.46428	0
chr6	141169024	141169060	HNRNPL_K562_rep02	-0.414712	0
chr6	141169026	141169043	DGCR8_HepG2_rep01	-0.619251	0
chr6	141169033	141169064	CSTF2_HepG2_rep01	-1.22254	0
chr6	141169034	141169047	CSTF2_HepG2_rep02	-1.31466	0
chr6	141169034	141169102	EIF3D_HepG2_rep02	-1.38932	0
chr6	141169085	141169109	KHSRP_K562_rep02	-0.00101077	0
chr6	141169088	141169093	TAF15_HepG2_rep01	-0.134415	0
chr6	141169089	141169109	HNRNPU_HepG2_rep01	0.543772	0
chr6	141169101	141169110	AGGF1_HepG2_rep01	0.0186924	0
chr6	141169230	141169274	SAFB_K562_rep02	0.824896	0
chr6	141169236	141169270	HNRNPU_K562_rep01	0.254464	0
chr6	141169237	141169270	HNRNPU_K562_rep02	0.743512	0
chr6	141169241	141169263	TAF15_HepG2_rep01	-0.719377	0
chr6	141169242	141169250	QKI_HepG2_rep02	-0.00866648	0
chr6	141169243	141169264	DROSHA_HepG2_rep02	-0.0684418	0
chr6	141169250	141169270	AGGF1_HepG2_rep02	0.309559	0
chr6	141169253	141169273	HNRNPA1_HepG2_rep01	-0.0128151	0
chr6	141169255	141169276	GRWD1_HepG2_rep01	-1.58274	0
chr6	141169277	141169318	LSM11_HepG2_rep01	0.188195	0
chr6	141169352	141169394	SAFB2_K562_rep02	0.969275	0
chr6	141169368	141169400	AKAP1_HepG2_rep02	0.341611	0
chr6	141169407	141169426	TROVE2_HepG2_rep01	-0.304383	0
chr6	141169410	141169420	HNRNPU_K562_rep02	0.158549	0
chr6	141169440	141169484	CSTF2_HepG2_rep01	-0.0526121	0
chr6	141169455	141169474	QKI_HepG2_rep01	0.276343	0
chr6	141169635	141169658	SAFB2_K562_rep02	0.554238	0
chr6	141169651	141169683	HNRNPA1_K562_rep01	-0.67375	0
chr6	141169671	141169681	HNRNPL_K562_rep02	-0.507821	0
chr6	141169721	141169756	DGCR8_HepG2_rep01	-0.204214	0
chr6	141169721	141169726	CSTF2T_HepG2_rep01	-0.0609052	0
chr6	141169722	141169763	HNRNPA1_HepG2_rep01	0.88027	0
chr6	141169725	141169758	ZC3H11A_HepG2_rep01	-0.0308606	0
chr6	141169726	141169763	CSTF2T_HepG2_rep01	-0.154015	0
chr6	141169727	141169756	HNRNPU_HepG2_rep02	-0.431256	0
chr6	141169728	141169746	TAF15_HepG2_rep02	-0.209521	0
chr6	141169728	141169758	HNRNPA1_K562_rep01	0.741288	0
chr6	141169730	141169753	U2AF2_HepG2_rep02	0.206039	0
chr6	141169764	141169814	POLR2G_HepG2_rep02	0.121737	0
chr6	141169769	141169796	HNRNPU_K562_rep02	-1.20402	0
chr6	141169786	141169819	CSTF2_HepG2_rep01	-0.900609	0
chr6	141169794	141169822	TAF15_HepG2_rep02	-0.302631	0
chr6	141169832	141169885	DGCR8_HepG2_rep01	-0.356217	0
chr6	141169837	141169839	FUS_HepG2_rep02	0.117359	0
chr6	141169848	141169893	CSTF2_HepG2_rep02	0.492693	0
chr6	141169851	141169900	LSM11_HepG2_rep01	-0.811805	0
chr6	141169855	141169892	UCHL5_K562_rep02	-0.394438	0
chr6	141169912	141169935	NOLC1_K562_rep02	0.786182	0
chr6	141169927	141169955	CSTF2_HepG2_rep02	-0.314662	0
chr6	141169936	141169962	DGCR8_HepG2_rep02	-0.616991	0
chr6	141169946	141169959	KHDRBS1_K562_rep02	0.311974	0
chr6	141169957	141169964	CSTF2_HepG2_rep01	-1.63757	0
chr6	141169995	141170047	FUS_K562_rep02	0.787406	0
chr6	141170003	141170028	HNRNPA1_HepG2_rep02	0.524387	0
chr6	141170010	141170039	HNRNPA1_HepG2_rep01	0.349755	0
chr6	141170015	141170042	TIAL1_HepG2_rep02	0.375121	0
chr6	141170030	141170064	KHDRBS1_K562_rep02	-0.536023	0
chr6	141170035	141170047	DDX52_HepG2_rep01	0.256551	0
chr6	141170035	141170053	SUGP2_HepG2_rep01	-1.0642	0
chr6	141170043	141170046	HNRNPC_HepG2_rep01	-0.370605	0
chr6	141170103	141170122	TAF15_HepG2_rep02	-0.946487	0
chr6	141170106	141170113	DGCR8_HepG2_rep01	0.965711	0
chr6	141170107	141170149	DHX30_HepG2_rep01	0.127691	0
chr6	141170110	141170163	SSB_HepG2_rep01	0.839208	0
chr6	141170114	141170169	U2AF2_K562_rep02	0.936754	0
chr6	141170116	141170137	GRWD1_HepG2_rep02	-1.53792	0
chr6	141170117	141170158	DROSHA_HepG2_rep02	-0.127336	0
chr6	141170118	141170168	KHSRP_K562_rep01	-0.143357	0
chr6	141170125	141170167	TIA1_HepG2_rep02	0.236082	0
chr6	141170127	141170167	UPF1_HepG2_rep01	0.169393	0
chr6	141170128	141170150	ZC3H11A_HepG2_rep01	-0.878858	0
chr6	141170128	141170138	SSB_HepG2_rep02	0.352072	0
chr6	141170129	141170167	TIA1_HepG2_rep01	0.963473	0
chr6	141170131	141170167	MATR3_HepG2_rep01	0.319824	0
chr6	141170134	141170166	U2AF2_HepG2_rep02	-0.22692	0
chr6	141170138	141170169	SSB_HepG2_rep02	0.352072	0
chr6	141170265	141170282	SFPQ_HepG2_rep01	-0.780946	0
chr6	141170323	141170350	TROVE2_HepG2_rep01	-0.134458	0
chr6	141170329	141170348	TROVE2_HepG2_rep02	-0.491766	0
chr6	141170357	141170377	PABPN1_HepG2_rep01	0.443701	0
chr6	141170399	141170446	EIF3D_HepG2_rep01	-1.05744	0
chr6	141170400	141170427	DKC1_HepG2_rep02	-0.200492	0
chr6	141170400	141170438	XRN2_HepG2_rep01	0.112345	0
chr6	141170403	141170456	U2AF1_HepG2_rep02	0.0623612	0
chr6	141170405	141170439	FAM120A_HepG2_rep01	-0.657294	0
chr6	141170406	141170454	HNRNPU_HepG2_rep02	-0.267757	0
chr6	141170408	141170434	DGCR8_HepG2_rep02	-0.616991	0
chr6	141170413	141170440	HNRNPA1_K562_rep01	0.32625	0
chr6	141170420	141170444	TIA1_HepG2_rep01	-0.773493	0
chr6	141170420	141170452	NCBP2_HepG2_rep02	-0.276298	0
chr6	141170421	141170436	SAFB_K562_rep01	0.81519	0
chr6	141170426	141170498	GRWD1_HepG2_rep01	-1.72025	0
chr6	141170437	141170470	LSM11_HepG2_rep01	-1.39677	0
chr6	141170596	141170638	ILF3_K562_rep01	-0.13886	0
chr6	141170600	141170632	HNRNPU_HepG2_rep02	0.246816	0
chr6	141170600	141170608	SUGP2_HepG2_rep01	-2.35371	0
chr6	141170601	141170641	DGCR8_HepG2_rep01	-0.882286	0
chr6	141170601	141170645	SAFB_K562_rep01	0.400152	0
chr6	141170603	141170622	DHX30_HepG2_rep01	-0.665858	0
chr6	141170605	141170641	HNRNPU_K562_rep01	-0.423608	0
chr6	141170605	141170641	DROSHA_HepG2_rep02	-0.583015	0
chr6	141170607	141170639	HNRNPU_K562_rep02	-0.426413	0
chr6	141170608	141170646	RBM5_HepG2_rep01	-0.0435229	0
chr6	141170612	141170633	NKRF_HepG2_rep02	-0.0345624	0
chr6	141170615	141170622	ZC3H11A_HepG2_rep02	-0.802558	0
chr6	141170615	141170642	CDC40_HepG2_rep01	-1.11008	0
chr6	141170617	141170646	CSTF2_HepG2_rep02	-1.31466	0
chr6	141170618	141170648	EIF3D_HepG2_rep01	-0.727289	0
chr6	141170629	141170671	EIF3D_HepG2_rep02	-0.488852	0
chr6	141170735	141170815	XPO5_HepG2_rep01	-0.0951582	0
chr6	141170738	141170749	HNRNPA1_HepG2_rep02	-0.797541	0
chr6	141170758	141170809	HNRNPU_K562_rep01	0.839426	0
chr6	141170759	141170803	UCHL5_HepG2_rep01	-2.33706	0
chr6	141170769	141170804	HNRNPC_HepG2_rep02	-0.117726	0
chr6	141170775	141170812	RBM5_HepG2_rep02	-1.59005	0
chr6	141170778	141170813	ZC3H11A_HepG2_rep01	-0.682937	0
chr6	141170778	141170814	LARP4_HepG2_rep01	-0.712297	0
chr6	141170778	141170815	HNRNPU_K562_rep02	0.895515	0
chr6	141170779	141170819	HNRNPC_K562_rep01	0.235801	0
chr6	141170780	141170814	DGCR8_HepG2_rep02	-0.786916	0
chr6	141170788	141170812	EIF3D_HepG2_rep01	-1.57529	0
chr6	141170789	141170796	HNRNPL_K562_rep02	0.492179	0
chr6	141170796	141170803	DROSHA_HepG2_rep02	-0.0684418	0
chr6	141170817	141170822	CDC40_HepG2_rep01	0.0598474	0
chr6	141170840	141170865	PPIL4_K562_rep02	0.62519	0
chr6	141170888	141170943	RBM5_HepG2_rep01	-0.0435229	0
chr6	141170906	141170918	DROSHA_HepG2_rep02	-0.805407	0
chr6	141170926	141170947	GRWD1_HepG2_rep01	-1.58274	0
chr6	141170984	141171010	HNRNPK_HepG2_rep02	0.288978	0
chr6	141170988	141171000	HNRNPU_K562_rep02	-0.619059	0
chr6	141171115	141171146	KHSRP_K562_rep02	0.583952	0
chr6	141171141	141171178	TIA1_HepG2_rep02	0.236082	0
chr6	141171171	141171210	SAFB_K562_rep02	0.824896	0
chr6	141171194	141171200	HNRNPL_K562_rep02	0.492179	0
chr6	141171247	141171279	KHDRBS1_K562_rep01	0.48657	0
chr6	141171310	141171352	HNRNPL_K562_rep02	0.129609	0
chr6	141171328	141171368	LSM11_HepG2_rep01	0.188195	0
chr6	141171416	141171444	HNRNPK_HepG2_rep01	0.120687	0
chr6	141171449	141171478	GTF2F1_HepG2_rep01	-0.408921	0
chr6	141171465	141171478	SAFB_HepG2_rep02	0.117651	0
chr6	141171519	141171543	MATR3_HepG2_rep01	-0.0952134	0
chr6	141171594	141171629	HNRNPA1_HepG2_rep01	0.639262	0
chr6	141171613	141171664	RBFOX2_K562_rep01	0.277506	0
chr6	141171615	141171640	TAF15_HepG2_rep01	-1.04131	0
chr6	141171615	141171657	SUGP2_HepG2_rep01	-1.5667	0
chr6	141171616	141171667	NKRF_HepG2_rep02	-0.256955	0
chr6	141171616	141171657	UCHL5_HepG2_rep01	-1.11467	0
chr6	141171633	141171666	HNRNPL_HepG2_rep02	-0.039939	0
chr6	141171645	141171667	TAF15_HepG2_rep02	-0.887593	0
chr6	141171645	141171691	FUS_K562_rep02	0.465478	0
chr6	141171691	141171735	HNRNPA1_HepG2_rep01	-0.597778	0
chr6	141171698	141171725	HNRNPU_HepG2_rep02	0.246816	0
chr6	141171702	141171724	MATR3_HepG2_rep02	0.051775	0
chr6	141171704	141171717	TAF15_HepG2_rep02	-0.302631	0
chr6	141171730	141171777	ZC3H11A_HepG2_rep02	-0.102118	0
chr6	141171734	141171764	PABPN1_HepG2_rep01	0.273776	0
chr6	141171736	141171769	SUGP2_HepG2_rep02	-1.19505	0
chr6	141171739	141171748	POLR2G_HepG2_rep01	0.278965	0
chr6	141171751	141171794	RBM5_HepG2_rep01	-0.195526	0
chr6	141171752	141171787	KHDRBS1_K562_rep02	-0.272989	0
chr6	141171752	141171783	HNRNPA1_K562_rep01	-0.258712	0
chr6	141171753	141171785	HNRNPA1_HepG2_rep02	0.787422	0
chr6	141171756	141171788	SUPV3L1_HepG2_rep02	-0.11871	0
chr6	141171769	141171805	UCHL5_HepG2_rep02	-1.07071	0
chr6	141171775	141171825	HNRNPU_HepG2_rep02	0.0541708	0
chr6	141171802	141171838	FUS_HepG2_rep01	0.490923	0
chr6	141171806	141171838	RBM22_HepG2_rep02	-0.911953	0
[truncated: 142 more rows]

## Sheet: ASAR8-2.7
Figure 1-table supplement 1
CHR	Start	Stop	RBP_Cell line_exp	Fold Enrichment	log10(pvalue)
chr8	2602196	2602254	SAFB2_K562_rep02	5.23606	11.7734
chr8	2669186	2669302	SLTM_K562_rep01	4.7642	11.5728
chr8	2594470	2594596	SAFB2_K562_rep02	5.11902	10.6505
chr8	2669202	2669301	SLTM_K562_rep02	4.53807	10.592
chr8	2602618	2602698	SAFB2_K562_rep02	4.2172	10.4438
chr8	2594456	2594580	SAFB2_K562_rep01	5.02766	10.0751
chr8	2602195	2602240	NIPBL_K562_rep01	5.65102	9.01623
chr8	2669174	2669320	SAFB2_K562_rep02	3.96928	8.50622
chr8	2587933	2587975	SUPV3L1_K562_rep01	7.35135	7.79696
chr8	2635564	2635607	SF3B1_K562_rep01	7.2136	7.63304
chr8	2602194	2602253	SAFB2_K562_rep01	4.58021	7.10192
chr8	2593338	2593454	SAFB2_K562_rep02	3.6972	6.79783
chr8	2608006	2608036	UTP3_K562_rep01	5.79406	6.33149
chr8	2608241	2608292	NIPBL_K562_rep01	5.14852	6.1683
chr8	2601246	2601289	LARP4_K562_rep02	5.08414	5.99999
chr8	2669223	2669323	SAFB2_K562_rep01	3.52677	5.9705
chr8	2625598	2625688	KHSRP_K562_rep02	3.58395	5.95946
chr8	2670972	2671064	NIPBL_K562_rep01	5.02299	5.60491
chr8	2673376	2673401	UTP3_K562_rep02	7.17477	5.58899
chr8	2602595	2602655	WDR43_K562_rep02	5.18168	5.4018
chr8	2595334	2595393	LARP4_K562_rep02	4.08414	5.27451
chr8	2592277	2592325	UTP3_K562_rep01	5.53103	5.16538
chr8	2602195	2602238	LARP4_K562_rep02	3.30653	5.15844
chr8	2620153	2620163	SF3B1_K562_rep01	6.62864	4.95703
chr8	2620163	2620194	SF3B1_K562_rep01	6.62864	4.95703
chr8	2601244	2601302	SAFB2_K562_rep02	4.09856	4.72697
chr8	2602425	2602480	SAFB2_K562_rep02	4.09856	4.72697
chr8	2663517	2663681	KHSRP_K562_rep01	3.25874	4.56724
chr8	2594723	2594792	SAFB2_K562_rep01	3.22511	4.55496
chr8	2668862	2668904	SLTM_K562_rep01	4.42025	4.53722
chr8	2662170	2662221	DDX24_K562_rep02	3.60819	4.50825
chr8	2595738	2595793	NIPBL_K562_rep01	3.88549	4.37931
chr8	2604194	2604243	NIPBL_K562_rep01	3.88549	4.37931
chr8	2609192	2609287	SAFB2_K562_rep01	3.19116	4.34612
chr8	2609430	2609530	SAFB2_K562_rep01	3.19116	4.34612
chr8	2593194	2593263	SAFB2_K562_rep02	3.96928	4.30215
chr8	2668726	2668775	SLTM_K562_rep01	3.52716	4.21638
chr8	2608924	2608996	SAFB2_K562_rep01	3.92813	4.15306
chr8	2646006	2646155	SLTM_K562_rep01	4.30477	4.14527
chr8	2667090	2667128	UTP3_K562_rep02	6.75973	4.11567
chr8	2663585	2663692	KHSRP_K562_rep02	3.12827	4.10408
chr8	2608926	2608981	WDR43_K562_rep02	4.81911	4.09248
chr8	2609135	2609198	SAFB2_K562_rep02	3.92347	4.07784
chr8	2602757	2602767	UTP3_K562_rep01	5.2091	4.02001
chr8	2602767	2602800	UTP3_K562_rep01	5.2091	4.02001
chr8	2604054	2604087	UTP3_K562_rep01	5.2091	4.02001
chr8	2610711	2610802	SAFB2_K562_rep02	2.66972	3.9392
chr8	2594734	2594794	SAFB2_K562_rep02	3.09856	3.86112
chr8	2609464	2609534	SAFB2_K562_rep02	3.09856	3.86112
chr8	2611189	2611267	LARP4_K562_rep02	4.49917	3.82325
chr8	2594460	2594500	FASTKD2_K562_rep02	4.65184	3.82226
chr8	2669165	2669223	SAFB2_K562_rep01	3.0083	3.75707
chr8	2608243	2608296	SAFB2_K562_rep02	2.63224	3.75092
chr8	2595298	2595356	SAFB2_K562_rep02	3.01367	3.67498
chr8	2604047	2604054	UTP3_K562_rep01	4.62414	3.67017
chr8	2602616	2602681	SAFB2_K562_rep01	2.96877	3.5586
chr8	2596467	2596527	SAFB2_K562_rep02	2.32683	3.46824
chr8	2592075	2592142	SAFB2_K562_rep02	2.96928	3.46712
chr8	2604599	2604645	SAFB2_K562_rep02	3.72416	3.43228
chr8	2603193	2603241	NIPBL_K562_rep01	4.37091	3.38614
chr8	2603334	2603379	NIPBL_K562_rep01	4.37091	3.38614
chr8	2651083	2651154	NIPBL_K562_rep01	4.37091	3.38614
chr8	2670603	2670666	FMR1_K562_rep02	3.86161	3.37588
chr8	2666734	2666787	SLTM_K562_rep01	4.04174	3.36882
chr8	2608849	2608916	SAFB2_K562_rep01	2.88631	3.36168
chr8	2607908	2608000	SAFB2_K562_rep02	2.55424	3.34639
chr8	2607413	2607471	SLTM_K562_rep01	2.83528	3.30843
chr8	2596931	2596963	LARP4_K562_rep02	4.30653	3.28952
chr8	2668588	2668598	UTP3_K562_rep01	5.79406	3.28478
chr8	2668598	2668630	UTP3_K562_rep01	5.79406	3.28478
chr8	2594771	2594811	LARP4_K562_rep02	3.49917	3.23858
chr8	2600955	2600989	LARP4_K562_rep02	3.49917	3.23858
chr8	2592621	2592676	KHDRBS1_K562_rep01	2.90161	3.20717
chr8	2604214	2604257	SAFB2_K562_rep02	3.66972	3.19638
chr8	2604688	2604735	SAFB2_K562_rep02	3.66972	3.19638
chr8	2608937	2608991	SAFB2_K562_rep02	3.66972	3.19638
chr8	2596466	2596534	SAFB2_K562_rep01	2.22511	3.18532
chr8	2667914	2668010	SAFB2_K562_rep01	2.84324	3.16798
chr8	2593194	2593260	SAFB2_K562_rep01	3.55373	3.12651
chr8	2595995	2596044	SAFB2_K562_rep01	3.55373	3.12651
chr8	2610719	2610778	SAFB2_K562_rep01	3.55373	3.12651
chr8	2608843	2608893	SAFB2_K562_rep02	2.82726	3.0683
chr8	2669255	2669321	UCHL5_K562_rep02	3.72104	3.04254
chr8	2667380	2667465	SLTM_K562_rep02	3.06859	3.01707
chr8	2608244	2608299	UCHL5_K562_rep01	3.8356	3.01428
chr8	2600441	2600473	SAFB2_K562_rep02	3.55424	3.01412
chr8	2612142	2612212	SAFB2_K562_rep02	3.55424	3.01412
chr8	2669161	2669279	BUD13_K562_rep02	3.79828	3.00996
chr8	2607405	2607472	SAFB2_K562_rep02	2.42871	2.97381
chr8	2594419	2594490	WDR43_K562_rep02	3.59672	2.92545
chr8	2601245	2601316	WDR43_K562_rep02	3.59672	2.92545
chr8	2592274	2592326	SAFB2_K562_rep01	3.49929	2.92115
chr8	2607416	2607457	UTP3_K562_rep01	4.79406	2.90383
chr8	2663510	2663585	KHSRP_K562_rep02	2.80634	2.85804
chr8	2589652	2589695	GPKOW_K562_rep01	4.36684	2.84799
chr8	2592270	2592315	NIPBL_K562_rep01	4.14852	2.84438
chr8	2601470	2601493	NIPBL_K562_rep01	4.14852	2.84438
chr8	2607410	2607465	NIPBL_K562_rep01	4.14852	2.84438
chr8	2669288	2669335	NIPBL_K562_rep01	3.37091	2.84094
chr8	2590549	2590598	SAFB2_K562_rep02	3.49284	2.7914
chr8	2605554	2605618	LARP4_K562_rep02	2.91421	2.78809
chr8	2590177	2590253	SAFB2_K562_rep02	2.33851	2.78779
chr8	2603969	2604038	SAFB2_K562_rep02	2.33851	2.78779
chr8	2595072	2595092	LARP4_K562_rep02	4.08414	2.76205
chr8	2602622	2602652	LARP4_K562_rep02	4.08414	2.76205
chr8	2603307	2603351	LARP4_K562_rep02	4.08414	2.76205
chr8	2669183	2669243	LARP4_K562_rep02	4.08414	2.76205
chr8	2601472	2601500	LARP4_K562_rep02	3.30653	2.74845
chr8	2607997	2608056	LARP4_K562_rep02	3.30653	2.74845
chr8	2607407	2607484	SAFB2_K562_rep01	2.30135	2.70449
chr8	2601276	2601345	FASTKD2_K562_rep02	3.42945	2.70344
chr8	2669660	2669711	SAFB2_K562_rep01	3.4427	2.70042
chr8	2662170	2662225	SUB1_HepG2_rep02	3.1547	2.69567
chr8	2668940	2668991	UCHL5_K562_rep01	3.6836	2.66789
chr8	2588895	2588988	SAFB2_K562_rep02	2.66972	2.66721
chr8	2594051	2594094	SAFB2_K562_rep02	2.66972	2.66721
chr8	2603192	2603240	SAFB2_K562_rep02	2.66972	2.66721
chr8	2608233	2608298	SAFB2_K562_rep01	2.04677	2.66513
chr8	2662164	2662224	BUD13_K562_rep01	3.54702	2.66101
chr8	2591848	2591909	SAFB2_K562_rep02	2.72416	2.64547
chr8	2667886	2667987	CPSF6_K562_rep02	2.88274	2.63442
chr8	2652929	2652980	SLTM_K562_rep01	3.71981	2.60545
chr8	2666540	2666602	SLTM_K562_rep01	3.71981	2.60545
chr8	2595499	2595531	SAFB2_K562_rep02	3.36159	2.58864
chr8	2595658	2595692	SAFB2_K562_rep02	3.36159	2.58864
chr8	2603846	2603870	SAFB2_K562_rep02	3.36159	2.58864
chr8	2662203	2662409	KHSRP_K562_rep02	2.04338	2.58402
chr8	2608461	2608507	ZC3H11A_K562_rep01	4.11741	2.5636
chr8	2655818	2655860	ZC3H11A_K562_rep01	4.11741	2.5636
chr8	2596293	2596334	SAFB2_K562_rep02	3.42871	2.55766
chr8	2608242	2608284	NIPBL_K562_rep02	4.37675	2.52888
chr8	2668321	2668361	NIPBL_K562_rep02	4.37675	2.52888
chr8	2590171	2590227	NIPBL_K562_rep01	2.56356	2.5226
chr8	2601346	2601383	NIPBL_K562_rep01	2.56356	2.5226
chr8	2601340	2601387	LARP4_K562_rep01	3.75375	2.51617
chr8	2602204	2602239	RBFOX2_K562_rep01	2.64008	2.51224
chr8	2664112	2664205	SAFB2_K562_rep01	3.32241	2.51187
chr8	2587902	2587974	SAFB2_K562_rep02	2.61313	2.471
chr8	2613337	2613394	SAFB2_K562_rep02	2.61313	2.471
chr8	2607363	2607468	PPIL4_K562_rep01	3.29377	2.44601
chr8	2596463	2596543	PPIL4_K562_rep02	3.28815	2.40942
chr8	2600653	2600707	SAFB2_K562_rep01	2.55373	2.39713
chr8	2605351	2605414	SAFB2_K562_rep01	2.55373	2.39713
chr8	2670605	2670684	SAFB2_K562_rep01	2.55373	2.39713
chr8	2587931	2588010	AKAP8L_K562_rep02	3.65656	2.39128
chr8	2602198	2602246	LARP4_K562_rep01	2.40583	2.38086
chr8	2603459	2603495	SAFB2_K562_rep02	3.2912	2.37822
chr8	2605692	2605733	SAFB2_K562_rep02	3.2912	2.37822
chr8	2670607	2670665	SAFB2_K562_rep02	3.2912	2.37822
chr8	2605872	2605926	XRCC6_K562_rep02	3.16819	2.37187
chr8	2597421	2597464	WDR43_K562_rep02	3.33368	2.34354
chr8	2602200	2602234	WDR43_K562_rep02	3.33368	2.34354
chr8	2615805	2615872	KHDRBS1_K562_rep01	3.22354	2.3413
chr8	2587849	2587878	AARS_K562_rep02	4.63786	2.33974
chr8	2588801	2588832	AARS_K562_rep02	4.63786	2.33974
chr8	2666187	2666197	AARS_K562_rep02	4.63786	2.33974
chr8	2666197	2666229	AARS_K562_rep02	4.63786	2.33974
chr8	2604942	2605036	KHDRBS1_K562_rep01	3.29393	2.33717
chr8	2591074	2591079	ZRANB2_K562_rep01	4.17147	2.3322
chr8	2591079	2591099	ZRANB2_K562_rep01	4.17147	2.3322
chr8	2640568	2640619	NIPBL_K562_rep01	3.88549	2.31077
chr8	2669188	2669220	NIPBL_K562_rep01	3.88549	2.31077
chr8	2609146	2609192	SAFB2_K562_rep01	3.25828	2.29705
chr8	2634083	2634198	KHSRP_K562_rep02	2.52255	2.28726
chr8	2595503	2595524	LARP4_K562_rep02	3.08414	2.26937
chr8	2600419	2600458	LARP4_K562_rep02	3.08414	2.26937
chr8	2590039	2590097	SAFB2_K562_rep02	2.49284	2.2668
chr8	2594259	2594299	SAFB2_K562_rep02	2.49284	2.2668
chr8	2615556	2615595	CPEB4_K562_rep02	4.09889	2.26411
chr8	2625284	2625334	CPEB4_K562_rep02	4.09889	2.26411
chr8	2671473	2671535	FMR1_K562_rep02	3.37619	2.25794
chr8	2605871	2605929	XRCC6_K562_rep01	2.9446	2.25589
chr8	2646619	2646646	PABPC4_K562_rep02	4.52467	2.25167
chr8	2594586	2594620	LARP4_K562_rep02	3.8211	2.2427
chr8	2597284	2597326	LARP4_K562_rep02	3.8211	2.2427
chr8	2606237	2606283	LARP4_K562_rep02	3.8211	2.2427
chr8	2612157	2612195	LARP4_K562_rep02	3.8211	2.2427
chr8	2638786	2638836	LARP4_K562_rep02	3.8211	2.2427
chr8	2653248	2653294	SLTM_K562_rep01	3.52716	2.23044
chr8	2612848	2612946	HNRNPL_K562_rep02	2.55107	2.22827
chr8	2662175	2662219	UCHL5_K562_rep02	3.34253	2.22078
chr8	2668934	2668992	UCHL5_K562_rep02	3.34253	2.22078
chr8	2662105	2662136	ZNF622_K562_rep02	3.42345	2.20855
chr8	2600365	2600442	RBFOX2_K562_rep01	3.22504	2.20263
chr8	2593539	2593610	SAFB2_K562_rep01	2.49929	2.20068
chr8	2598217	2598283	DDX42_K562_rep01	3.02261	2.1957
chr8	2604087	2604129	WDR3_K562_rep01	4.44354	2.18916
chr8	2676781	2676789	WDR3_K562_rep01	4.44354	2.18916
chr8	2676789	2676817	WDR3_K562_rep01	4.44354	2.18916
chr8	2596462	2596498	WDR43_K562_rep02	4.01175	2.18343
chr8	2618926	2619022	HNRNPK_K562_rep02	3.28724	2.17828
chr8	2652945	2652996	SLTM_K562_rep02	3.53807	2.17256
chr8	2669597	2669632	SLTM_K562_rep02	3.53807	2.17256
chr8	2595205	2595229	SAFB2_K562_rep02	3.1392	2.15933
chr8	2604303	2604333	SAFB2_K562_rep02	3.1392	2.15933
chr8	2600905	2600929	SAFB2_K562_rep02	3.2172	2.15692
chr8	2609626	2609658	SAFB2_K562_rep02	3.2172	2.15692
chr8	2669976	2670014	SLTM_K562_rep02	2.69008	2.1499
chr8	2616814	2616878	KHDRBS1_K562_rep01	3.14954	2.14276
chr8	2590047	2590106	SAFB2_K562_rep01	3.12077	2.10482
chr8	2601594	2601631	SAFB2_K562_rep01	3.12077	2.10482
chr8	2605397	2605456	LARP4_K562_rep01	3.53136	2.10397
chr8	2602195	2602204	RBFOX2_K562_rep01	2.51454	2.09189
chr8	2666408	2666475	SLTM_K562_rep01	2.71981	2.08281
chr8	2595169	2595233	KHDRBS1_K562_rep01	2.42517	2.05491
chr8	2602195	2602249	UCHL5_K562_rep01	2.09864	2.04593
chr8	2593972	2594013	FASTKD2_K562_rep02	3.84449	2.03191
chr8	2603449	2603498	FASTKD2_K562_rep02	3.84449	2.03191
chr8	2604333	2604377	FASTKD2_K562_rep02	3.84449	2.03191
chr8	2638701	2638734	WRN_K562_rep01	4.23168	2.02852
chr8	2587906	2587996	SAFB2_K562_rep01	2.38381	2.01904
chr8	2600397	2600444	SAFB2_K562_rep01	2.38381	2.01904
chr8	2611915	2611973	SAFB2_K562_rep01	2.38381	2.01904
chr8	2669168	2669214	AKAP1_K562_rep01	3.82332	2.01306
chr8	2603826	2603877	WDR43_K562_rep02	2.74872	1.9952
chr8	2601582	2601618	UCHL5_K562_rep01	3.32103	1.98736
chr8	2597009	2597056	RBFOX2_K562_rep01	3.05511	1.98236
chr8	2617696	2617737	AARS_K562_rep02	3.63786	1.9781
chr8	2596016	2596034	SAFB2_K562_rep02	3.05674	1.96006
chr8	2597283	2597329	SAFB2_K562_rep02	3.05674	1.96006
chr8	2601084	2601100	SAFB2_K562_rep02	3.05674	1.96006
chr8	2606740	2606775	SAFB2_K562_rep02	3.05674	1.96006
chr8	2668547	2668584	SAFB2_K562_rep02	3.05674	1.96006
chr8	2602624	2602652	GNL3_K562_rep01	3.60778	1.95531
chr8	2616298	2616347	KHDRBS1_K562_rep01	3.07153	1.93228
chr8	2667771	2667884	RBFOX2_K562_rep02	3.24769	1.92069
chr8	2662255	2662331	TIA1_K562_rep02	3.11011	1.91843
chr8	2611292	2611297	NPM1_K562_rep01	4.0774	1.91411
chr8	2665473	2665506	NPM1_K562_rep01	4.0774	1.91411
chr8	2662103	2662149	DDX24_K562_rep01	3.70037	1.9051
chr8	2607915	2607959	SAFB2_K562_rep01	3.04677	1.89561
chr8	2611285	2611332	SAFB2_K562_rep01	3.04677	1.89561
chr8	2612612	2612669	SAFB2_K562_rep01	3.04677	1.89561
chr8	2653244	2653306	SAFB2_K562_rep01	3.04677	1.89561
chr8	2606254	2606303	SAFB2_K562_rep02	2.36159	1.88607
chr8	2611010	2611055	SAFB2_K562_rep02	2.36159	1.88607
chr8	2600147	2600191	XRCC6_K562_rep01	3.45917	1.87836
chr8	2670416	2670470	SLTM_K562_rep01	2.30477	1.87407
chr8	2590555	2590578	AARS_K562_rep01	3.26531	1.87171
chr8	2594055	2594092	NIPBL_K562_rep01	2.88549	1.86855
chr8	2599166	2599198	NIPBL_K562_rep01	2.88549	1.86855
chr8	2665655	2665686	NIPBL_K562_rep01	2.88549	1.86855
chr8	2668738	2668771	SLTM_K562_rep02	2.53807	1.86839
chr8	2669923	2669940	SLTM_K562_rep01	3.30477	1.86133
chr8	2670166	2670200	SLTM_K562_rep01	3.30477	1.86133
chr8	2618908	2618982	HNRNPL_K562_rep02	2.36665	1.85563
chr8	2632499	2632506	NIPBL_K562_rep02	3.96171	1.82984
chr8	2632506	2632530	NIPBL_K562_rep02	3.96171	1.82984
chr8	2659804	2659811	NIPBL_K562_rep02	3.96171	1.82984
chr8	2659811	2659842	NIPBL_K562_rep02	3.96171	1.82984
chr8	2669182	2669217	NIPBL_K562_rep02	3.96171	1.82984
chr8	2603833	2603865	SDAD1_K562_rep02	3.95573	1.82552
chr8	2629627	2629688	QKI_K562_rep02	3.25665	1.81195
chr8	2590185	2590260	SAFB2_K562_rep01	1.70574	1.81101
chr8	2596722	2596805	KHDRBS1_K562_rep02	2.25057	1.80691
chr8	2604191	2604235	XRCC6_K562_rep02	3.58323	1.80472
chr8	2602290	2602313	LARP4_K562_rep02	2.8211	1.80433
chr8	2602701	2602721	LARP4_K562_rep02	2.8211	1.80433
chr8	2612607	2612653	LARP4_K562_rep02	2.8211	1.80433
chr8	2593387	2593444	NIPBL_K562_rep01	3.56356	1.7881
chr8	2597890	2597923	NIPBL_K562_rep01	3.56356	1.7881
chr8	2611025	2611066	NIPBL_K562_rep01	3.56356	1.7881
chr8	2667727	2667766	NIPBL_K562_rep01	3.56356	1.7881
chr8	2668966	2668982	NIPBL_K562_rep01	3.56356	1.7881
chr8	2673464	2673506	NIPBL_K562_rep01	3.56356	1.7881
chr8	2590525	2590587	TROVE2_K562_rep02	2.65942	1.78516
chr8	2594062	2594100	WDR43_K562_rep02	3.01175	1.78084
chr8	2629912	2629963	LIN28B_K562_rep01	2.93148	1.76548
chr8	2669661	2669699	SAFB2_K562_rep02	2.96928	1.75045
chr8	2593160	2593192	LARP4_K562_rep02	3.49917	1.73423
chr8	2604958	2604963	LARP4_K562_rep02	3.49917	1.73423
chr8	2607380	2607414	LARP4_K562_rep02	3.49917	1.73423
chr8	2609749	2609787	LARP4_K562_rep02	3.49917	1.73423
chr8	2668844	2668893	LARP4_K562_rep02	3.49917	1.73423
chr8	2592761	2592839	HNRNPL_K562_rep02	2.90722	1.73171
chr8	2589063	2589108	KHDRBS1_K562_rep01	2.90161	1.72922
chr8	2639195	2639276	KHDRBS1_K562_rep01	2.90161	1.72922
chr8	2601887	2601913	WDR43_K562_rep02	2.33368	1.72011
chr8	2602195	2602244	SAFB_K562_rep01	2.90265	1.70618
chr8	2595310	2595325	SAFB2_K562_rep01	2.88631	1.70131
chr8	2604880	2604914	SAFB2_K562_rep01	2.88631	1.70131
chr8	2645433	2645489	SAFB2_K562_rep01	2.88631	1.70131
chr8	2671235	2671291	SAFB2_K562_rep01	2.88631	1.70131
chr8	2596468	2596502	RPS11_K562_rep02	3.76457	1.68948
chr8	2672070	2672135	UCHL5_K562_rep02	3.0206	1.68548
chr8	2606932	2606971	DROSHA_K562_rep01	3.23976	1.68336
chr8	2596463	2596512	NIPBL_K562_rep01	2.14852	1.68116
chr8	2594041	2594094	KHDRBS1_K562_rep01	2.22354	1.67709
chr8	2595656	2595684	SAFB2_K562_rep01	2.96877	1.6746
chr8	2595875	2595905	SAFB2_K562_rep01	2.96877	1.6746
chr8	2596301	2596335	SAFB2_K562_rep01	2.96877	1.6746
chr8	2603451	2603493	SAFB2_K562_rep01	2.96877	1.6746
chr8	2604313	2604352	SAFB2_K562_rep01	2.96877	1.6746
chr8	2606751	2606802	SAFB2_K562_rep01	2.96877	1.6746
chr8	2645523	2645578	SAFB2_K562_rep01	2.96877	1.6746
chr8	2653259	2653335	TAF15_K562_rep01	3.00608	1.67311
chr8	2662164	2662216	BUD13_K562_rep02	3.16085	1.66775
chr8	2605573	2605627	UCHL5_K562_rep01	3.09864	1.6552
chr8	2596458	2596525	PPIL4_K562_rep01	2.89784	1.6518
chr8	2597023	2597109	PPIL4_K562_rep01	2.89784	1.6518
chr8	2602311	2602384	LARP4_K562_rep01	2.53136	1.65084
chr8	2588903	2588973	SAFB2_K562_rep01	2.19116	1.6477
chr8	2591850	2591897	SAFB2_K562_rep01	2.19116	1.6477
chr8	2591968	2592019	SAFB2_K562_rep01	2.19116	1.6477
chr8	2600534	2600576	SAFB2_K562_rep01	2.19116	1.6477
chr8	2603821	2603867	DROSHA_K562_rep02	3.38326	1.63922
chr8	2628663	2628715	TROVE2_K562_rep01	3.2007	1.63845
chr8	2600658	2600691	FASTKD2_K562_rep02	2.84449	1.63713
chr8	2609916	2609978	CSTF2T_K562_rep01	3.01251	1.63222
chr8	2595152	2595230	KHDRBS1_K562_rep02	2.18644	1.62843
chr8	2590548	2590609	SAFB2_K562_rep01	2.25828	1.6278
chr8	2600997	2601040	SAFB2_K562_rep01	2.25828	1.6278
chr8	2672070	2672135	SAFB2_K562_rep01	2.25828	1.6278
chr8	2592758	2592831	HNRNPL_K562_rep01	2.89214	1.61402
chr8	2670598	2670671	CSTF2T_K562_rep02	2.88915	1.61306
chr8	2612325	2612355	GPKOW_K562_rep01	3.62987	1.59609
chr8	2620306	2620344	GPKOW_K562_rep01	3.62987	1.59609
chr8	2669191	2669200	GPKOW_K562_rep01	3.62987	1.59609
chr8	2669200	2669230	GPKOW_K562_rep01	3.62987	1.59609
chr8	2648694	2648751	TARDBP_K562_rep01	2.92513	1.58579
chr8	2668604	2668665	YWHAG_K562_rep01	2.9159	1.58003
chr8	2594958	2594990	WDR43_K562_rep02	3.59672	1.57343
chr8	2600655	2600668	WDR43_K562_rep02	3.59672	1.57343
chr8	2605088	2605119	WDR43_K562_rep02	3.59672	1.57343
chr8	2608839	2608872	WDR43_K562_rep02	3.59672	1.57343
chr8	2672279	2672312	WDR43_K562_rep02	3.59672	1.57343
chr8	2596470	2596515	RBFOX2_K562_rep01	2.86247	1.56999
chr8	2611297	2611312	NPM1_K562_rep01	3.0774	1.56786
chr8	2601303	2601343	SDAD1_K562_rep02	2.37077	1.55536
chr8	2662409	2662485	KHSRP_K562_rep02	2.80634	1.55377
chr8	2663734	2663782	KHSRP_K562_rep02	2.80634	1.55377
chr8	2672049	2672058	GNL3_K562_rep02	3.56431	1.55142
chr8	2593149	2593208	NIPBL_K562_rep01	2.30052	1.54351
chr8	2609271	2609304	NIPBL_K562_rep01	2.30052	1.54351
chr8	2598799	2598848	SAFB2_K562_rep02	2.77663	1.541
chr8	2605867	2605900	SAFB2_K562_rep02	2.77663	1.541
chr8	2644527	2644580	SAFB2_K562_rep02	2.77663	1.541
chr8	2601709	2601716	SAFB2_K562_rep02	2.87617	1.53192
chr8	2605591	2605598	SAFB2_K562_rep02	2.87617	1.53192
chr8	2610889	2610911	SAFB2_K562_rep02	2.87617	1.53192
chr8	2664137	2664190	SAFB2_K562_rep02	2.87617	1.53192
chr8	2656948	2657057	KHSRP_K562_rep02	1.80634	1.51902
chr8	2592153	2592203	SAFB2_K562_rep02	2.1392	1.50897
chr8	2607833	2607869	SAFB2_K562_rep02	2.1392	1.50897
chr8	2602194	2602246	SAFB_K562_rep02	2.73179	1.50265
chr8	2609516	2609554	SLTM_K562_rep01	3.04174	1.49979
chr8	2651071	2651119	SLTM_K562_rep01	3.04174	1.49979
chr8	2652766	2652815	SLTM_K562_rep01	3.04174	1.49979
chr8	2672106	2672137	SLTM_K562_rep01	3.04174	1.49979
chr8	2669965	2669993	SUB1_HepG2_rep01	3.20535	1.49853
chr8	2671063	2671104	SLTM_K562_rep01	2.52716	1.49803
chr8	2610848	2610956	SAFB_K562_rep01	2.81519	1.49796
chr8	2607374	2607467	SAFB_K562_rep02	2.8249	1.49776
chr8	2599156	2599215	SAFB2_K562_rep01	2.79885	1.49746
chr8	2606704	2606744	SAFB2_K562_rep01	2.79885	1.49746
chr8	2612135	2612166	SAFB2_K562_rep01	2.79885	1.49746
chr8	2605050	2605075	SAFB2_K562_rep01	2.79885	1.49746
chr8	2670413	2670444	CPEB4_K562_rep01	3.47361	1.49048
chr8	2603065	2603097	SDAD1_K562_rep02	2.95573	1.48329
chr8	2604137	2604154	LARP4_K562_rep02	2.23614	1.48305
chr8	2667335	2667402	HNRNPK_K562_rep02	2.80181	1.4808
chr8	2668667	2668708	DDX55_K562_rep02	3.17056	1.47177
chr8	2591464	2591567	UCHL5_K562_rep02	1.89507	1.46921
chr8	2614523	2614532	WRN_K562_rep02	2.58279	1.46682
chr8	2614532	2614562	WRN_K562_rep02	2.58279	1.46682
chr8	2600982	2601029	XRCC6_K562_rep01	2.45917	1.46379
chr8	2606266	2606317	SAFB2_K562_rep01	2.12077	1.46188
chr8	2643831	2643919	ILF3_K562_rep01	2.76803	1.46135
chr8	2605395	2605425	FASTKD2_K562_rep02	3.42945	1.46119
chr8	2611922	2611957	FASTKD2_K562_rep02	3.42945	1.46119
chr8	2629911	2629973	LIN28B_K562_rep02	2.86039	1.45626
chr8	2601677	2601719	XRCC6_K562_rep01	3.13724	1.44637
chr8	2670599	2670640	XRCC6_K562_rep01	3.13724	1.44637
chr8	2600853	2600875	GPKOW_K562_rep02	3.40646	1.44604
chr8	2604622	2604652	GPKOW_K562_rep02	3.40646	1.44604
chr8	2610724	2610746	GPKOW_K562_rep02	3.40646	1.44604
chr8	2664027	2664055	GPKOW_K562_rep02	3.40646	1.44604
chr8	2610716	2610748	QKI_K562_rep01	3.4031	1.44384
chr8	2607599	2607660	HNRNPK_K562_rep01	2.84335	1.43386
chr8	2606321	2606328	ZC3H11A_K562_rep01	3.38045	1.42899
chr8	2606328	2606350	ZC3H11A_K562_rep01	3.38045	1.42899
chr8	2593420	2593458	XRCC6_K562_rep02	2.58323	1.42347
chr8	2608251	2608299	UCHL5_K562_rep02	2.82795	1.423
chr8	2594720	2594775	UCHL5_K562_rep01	2.32103	1.41801
chr8	2590837	2590882	NIPBL_K562_rep01	2.56356	1.40794
chr8	2620663	2620700	NIPBL_K562_rep01	2.56356	1.40794
chr8	2634503	2634543	NIPBL_K562_rep01	2.56356	1.40794
chr8	2647490	2647527	NIPBL_K562_rep01	2.56356	1.40794
chr8	2664568	2664594	NIPBL_K562_rep01	2.56356	1.40794
chr8	2664680	2664710	NIPBL_K562_rep01	2.56356	1.40794
chr8	2667347	2667386	NIPBL_K562_rep01	2.56356	1.40794
chr8	2652925	2652983	YWHAG_K562_rep02	2.97774	1.40768
chr8	2672069	2672136	YWHAG_K562_rep02	2.97774	1.40768
chr8	2674940	2675025	SLTM_K562_rep02	1.95311	1.40602
chr8	2596459	2596531	HNRNPL_K562_rep01	2.77666	1.39587
chr8	2606271	2606307	EFTUD2_K562_rep01	3.32252	1.39133
chr8	2652963	2652971	EFTUD2_K562_rep01	3.32252	1.39133
chr8	2652971	2652996	EFTUD2_K562_rep01	3.32252	1.39133
chr8	2594498	2594579	FUS_K562_rep01	2.64971	1.37552
chr8	2668680	2668713	DDX24_K562_rep01	3.28534	1.36739
chr8	2667893	2667928	GEMIN5_K562_rep01	2.77663	1.36213
chr8	2596490	2596517	LARP4_K562_rep02	2.49917	1.3577
chr8	2604301	2604331	LARP4_K562_rep02	2.49917	1.3577
chr8	2667742	2667809	RBFOX2_K562_rep01	2.75555	1.35257
chr8	2608230	2608290	PPIL4_K562_rep02	2.74067	1.35234
chr8	2645439	2645485	SAFB2_K562_rep02	2.66972	1.34216
chr8	2651074	2651115	SAFB2_K562_rep02	2.66972	1.34216
chr8	2606743	2606785	FASTKD2_K562_rep02	1.84449	1.33683
chr8	2662186	2662218	ZNF622_K562_rep01	2.18078	1.32689
chr8	2606330	2606381	SAFB2_K562_rep02	1.77663	1.32323
chr8	2610580	2610628	SAFB2_K562_rep02	1.77663	1.32323
chr8	2621756	2621838	SAFB2_K562_rep02	1.77663	1.32323
chr8	2671049	2671107	SLTM_K562_rep02	2.1755	1.3231
chr8	2591027	2591065	SAFB2_K562_rep02	2.05674	1.31849
chr8	2611933	2611964	SAFB2_K562_rep02	2.05674	1.31849
chr8	2671885	2671942	SAFB2_K562_rep02	2.05674	1.31849
chr8	2609620	2609680	SLTM_K562_rep02	2.95311	1.3156
chr8	2653242	2653281	SLTM_K562_rep02	2.95311	1.3156
chr8	2666747	2666791	SLTM_K562_rep02	2.95311	1.3156
chr8	2667578	2667613	SLTM_K562_rep02	2.95311	1.3156
chr8	2668592	2668607	SLTM_K562_rep02	2.95311	1.3156
chr8	2667307	2667416	SAFB_K562_rep02	2.63225	1.30925
chr8	2670404	2670516	SAFB_K562_rep02	2.63225	1.30925
chr8	2589119	2589165	KHDRBS1_K562_rep01	1.98907	1.30677
chr8	2592676	2592720	KHDRBS1_K562_rep01	1.98907	1.30677
chr8	2670855	2670942	KHDRBS1_K562_rep01	1.98907	1.30677
chr8	2605118	2605160	LARP4_K562_rep01	2.9464	1.30541
chr8	2601689	2601715	SAFB2_K562_rep01	2.6062	1.30303
chr8	2604422	2604440	SAFB2_K562_rep01	2.6062	1.30303
chr8	2615421	2615467	SAFB2_K562_rep01	2.6062	1.30303
chr8	2666546	2666582	SAFB2_K562_rep01	2.6062	1.30303
chr8	2669984	2670040	SAFB2_K562_rep01	1.67332	1.30091
chr8	2671940	2672010	SAFB2_K562_rep01	1.67332	1.30091
chr8	2593908	2593952	XRCC6_K562_rep02	3.16819	1.29322
chr8	2611118	2611140	XRCC6_K562_rep02	3.16819	1.29322
chr8	2606327	2606380	SAFB2_K562_rep01	1.73745	1.2857
chr8	2674894	2674965	SAFB2_K562_rep01	1.96877	1.28503
chr8	2597290	2597325	SAFB2_K562_rep01	2.70574	1.28333
chr8	2605693	2605729	SAFB2_K562_rep01	2.70574	1.28333
chr8	2608463	2608481	SAFB2_K562_rep01	2.70574	1.28333
chr8	2609472	2609489	NIPBL_K562_rep01	3.14852	1.28095
chr8	2614668	2614701	NIPBL_K562_rep01	3.14852	1.28095
chr8	2629775	2629808	NIPBL_K562_rep01	3.14852	1.28095
chr8	2643520	2643555	NIPBL_K562_rep01	3.14852	1.28095
chr8	2648137	2648169	NIPBL_K562_rep01	3.14852	1.28095
chr8	2651380	2651403	NIPBL_K562_rep01	3.14852	1.28095
chr8	2654345	2654378	NIPBL_K562_rep01	3.14852	1.28095
chr8	2655009	2655046	NIPBL_K562_rep01	3.14852	1.28095
chr8	2670424	2670442	NIPBL_K562_rep01	3.14852	1.28095
chr8	2671160	2671165	NIPBL_K562_rep01	3.14852	1.28095
chr8	2662171	2662221	GRWD1_K562_rep02	2.56098	1.27308
chr8	2594060	2594088	SAFB2_K562_rep01	2.04677	1.26901
chr8	2592276	2592309	GPKOW_K562_rep01	2.62987	1.26599
chr8	2594807	2594843	WDR43_K562_rep02	2.59672	1.24469
chr8	2603475	2603509	NIPBL_K562_rep02	2.37675	1.24132
chr8	2590404	2590442	LARP4_K562_rep02	3.08414	1.24119
chr8	2598814	2598839	LARP4_K562_rep02	3.08414	1.24119
chr8	2605700	2605734	LARP4_K562_rep02	3.08414	1.24119
chr8	2606646	2606681	LARP4_K562_rep02	3.08414	1.24119
chr8	2608407	2608430	LARP4_K562_rep02	3.08414	1.24119
chr8	2610423	2610465	LARP4_K562_rep02	3.08414	1.24119
chr8	2611454	2611475	LARP4_K562_rep02	3.08414	1.24119
chr8	2614944	2614976	LARP4_K562_rep02	3.08414	1.24119
chr8	2615082	2615114	LARP4_K562_rep02	3.08414	1.24119
chr8	2621429	2621438	LARP4_K562_rep02	3.08414	1.24119
chr8	2641509	2641551	LARP4_K562_rep02	3.08414	1.24119
chr8	2669958	2669998	LARP4_K562_rep02	3.08414	1.24119
chr8	2673243	2673264	LARP4_K562_rep02	3.08414	1.24119
chr8	2677143	2677181	LARP4_K562_rep02	3.08414	1.24119
chr8	2611913	2611963	LARP4_K562_rep02	1.8211	1.23451
chr8	2612606	2612632	DHX30_K562_rep01	2.57771	1.23254
chr8	2639810	2639848	DHX30_K562_rep01	2.57771	1.23254
chr8	2598710	2598745	DROSHA_K562_rep01	2.23976	1.23155
chr8	2672058	2672088	GNL3_K562_rep02	2.56431	1.22401
chr8	2600672	2600723	SLTM_K562_rep01	2.30477	1.22284
chr8	2607688	2607737	SLTM_K562_rep01	2.30477	1.22284
chr8	2671340	2671386	SLTM_K562_rep01	2.30477	1.22284
chr8	2598533	2598589	ZC3H11A_K562_rep02	2.24907	1.20665
chr8	2667883	2667938	UCHL5_K562_rep02	2.0206	1.19649
chr8	2595339	2595463	HNRNPC_K562_rep01	2.55773	1.19348
chr8	2601307	2601402	HLTF_K562_rep01	1.36795	1.18764
chr8	2600281	2600438	KHDRBS1_K562_rep01	1.48657	1.18554
chr8	2618933	2618994	HNRNPL_K562_rep01	2.51363	1.17831
chr8	2608187	2608233	SAFB2_K562_rep01	1.4427	1.17373
chr8	2598299	2598341	DROSHA_K562_rep02	2.96822	1.17113
chr8	2600469	2600496	DROSHA_K562_rep02	2.96822	1.17113
chr8	2645440	2645481	DROSHA_K562_rep02	2.96822	1.17113
chr8	2651067	2651110	DROSHA_K562_rep02	2.96822	1.17113
chr8	2596132	2596142	AQR_K562_rep02	2.96708	1.17045
chr8	2596142	2596174	AQR_K562_rep02	2.96708	1.17045
chr8	2662258	2662287	AQR_K562_rep02	2.96708	1.17045
chr8	2668668	2668703	UCHL5_K562_rep02	2.60556	1.16493
chr8	2675010	2675115	SLTM_K562_rep01	1.71981	1.16315
chr8	2589185	2589251	TAF15_K562_rep01	2.59105	1.15652
chr8	2611324	2611377	TAF15_K562_rep01	2.59105	1.15652
chr8	2604395	2604464	HLTF_K562_rep01	2.49348	1.1537
chr8	2629530	2629570	TBRG4_K562_rep02	2.72706	1.15316
chr8	2588933	2589006	PPIL4_K562_rep02	2.49966	1.15202
chr8	2605855	2605899	PPIL4_K562_rep02	2.49966	1.15202
chr8	2598677	2598725	SLTM_K562_rep01	2.71981	1.14831
chr8	2601866	2601939	HLTF_K562_rep01	1.81541	1.14625
chr8	2633061	2633148	KHSRP_K562_rep02	1.90588	1.1459
chr8	2667910	2667961	UCHL5_K562_rep01	2.09864	1.14325
chr8	2602786	2602795	FASTKD2_K562_rep02	2.42945	1.13961
chr8	2605227	2605237	FASTKD2_K562_rep02	2.42945	1.13961
chr8	2607962	2607991	FASTKD2_K562_rep02	2.42945	1.13961
chr8	2592002	2592034	SAFB2_K562_rep02	1.87617	1.13903
chr8	2599753	2599801	NIPBL_K562_rep01	1.9786	1.13571
chr8	2674906	2674941	NIPBL_K562_rep01	1.9786	1.13571
chr8	2615340	2615379	SAFB2_K562_rep02	2.55424	1.13498
chr8	2621486	2621519	SAFB2_K562_rep02	2.55424	1.13498
chr8	2645864	2645906	SAFB2_K562_rep02	2.55424	1.13498
chr8	2670770	2670815	CSTF2T_K562_rep01	2.64994	1.13332
chr8	2662227	2662273	AQR_K562_rep01	2.69521	1.13195
chr8	2663714	2663775	KHSRP_K562_rep01	2.63425	1.13186
chr8	2628337	2628495	HNRNPL_K562_rep02	2.49218	1.12735
chr8	2594738	2594777	GTF2F1_K562_rep02	2.68737	1.12676
chr8	2638489	2638545	KHDRBS1_K562_rep01	2.48657	1.12625
chr8	2664018	2664027	GPKOW_K562_rep02	2.40646	1.12549
chr8	2596735	2596786	KHDRBS1_K562_rep01	1.90161	1.12533
chr8	2590119	2590159	SAFB2_K562_rep01	1.88631	1.10522
chr8	2604098	2604127	SAFB2_K562_rep01	1.88631	1.10522
chr8	2602384	2602403	SAFB2_K562_rep01	2.49929	1.10452
chr8	2605871	2605902	SAFB2_K562_rep01	2.49929	1.10452
chr8	2606485	2606512	SAFB2_K562_rep01	2.49929	1.10452
chr8	2608431	2608440	SAFB2_K562_rep01	2.49929	1.10452
chr8	2621781	2621821	SAFB2_K562_rep01	2.49929	1.10452
chr8	2639726	2639770	SAFB2_K562_rep01	2.49929	1.10452
chr8	2651067	2651111	SAFB2_K562_rep01	2.49929	1.10452
chr8	2665738	2665770	SAFB2_K562_rep01	2.49929	1.10452
chr8	2672286	2672326	SAFB2_K562_rep01	2.49929	1.10452
chr8	2652274	2652322	YWHAG_K562_rep01	2.55333	1.10359
chr8	2620602	2620694	KHDRBS1_K562_rep02	1.81447	1.09428
chr8	2608843	2608887	LARP4_K562_rep02	1.30653	1.09328
chr8	2588321	2588384	ILF3_K562_rep02	2.51305	1.08794
chr8	2670413	2670451	PTBP1_K562_rep02	2.61739	1.08107
chr8	2593188	2593250	PPIL4_K562_rep01	2.45727	1.08015
chr8	2600685	2600723	PPIL4_K562_rep01	2.45727	1.08015
chr8	2608239	2608296	PPIL4_K562_rep01	2.45727	1.08015
chr8	2594058	2594094	DROSHA_K562_rep01	1.91784	1.07296
chr8	2662254	2662292	SUB1_HepG2_rep01	2.79032	1.06757
chr8	2596971	2597026	UCHL5_K562_rep01	2.8356	1.05505
chr8	2609249	2609289	UCHL5_K562_rep01	2.8356	1.05505
chr8	2670353	2670382	UCHL5_K562_rep01	2.8356	1.05505
chr8	2597046	2597080	FTO_K562_rep02	2.76109	1.05103
chr8	2662188	2662205	ZNF622_K562_rep02	2.74538	1.04437
chr8	2669165	2669219	ZNF622_K562_rep02	2.74538	1.04437
chr8	2609492	2609532	SUB1_HepG2_rep02	2.73967	1.03899
chr8	2594456	2594503	ZNF622_K562_rep01	2.69535	1.0349
chr8	2669186	2669223	ZNF622_K562_rep01	2.69535	1.0349
chr8	2609532	2609551	SLTM_K562_rep02	2.69008	1.03376
chr8	2612889	2612937	SLTM_K562_rep02	2.69008	1.03376
chr8	2643609	2643664	SLTM_K562_rep02	2.69008	1.03376
chr8	2646062	2646113	SLTM_K562_rep02	2.69008	1.03376
chr8	2652776	2652816	SLTM_K562_rep02	2.69008	1.03376
chr8	2665434	2665494	SLTM_K562_rep02	2.69008	1.03376
chr8	2666882	2666887	SLTM_K562_rep02	2.69008	1.03376
chr8	2614213	2614244	XRCC6_K562_rep01	2.72221	1.02923
chr8	2590504	2590583	TARDBP_K562_rep02	1.89473	1.01737
chr8	2595261	2595333	CPSF6_K562_rep02	2.6197	1.01613
chr8	2668904	2668961	MTPAP_K562_rep02	2.60476	1.01183
chr8	2669475	2669482	NCBP2_K562_rep01	2.6878	1.01015
chr8	2669482	2669505	NCBP2_K562_rep01	2.6878	1.01015
chr8	2592270	2592302	DHX30_K562_rep01	1.99274	1.00055
chr8	2628573	2628624	TARDBP_K562_rep02	2.47969	0.996388
chr8	2598459	2598474	TROVE2_K562_rep02	2.65942	0.994543
chr8	2662769	2662801	TROVE2_K562_rep02	2.65942	0.994543
chr8	2678841	2678871	TROVE2_K562_rep02	2.65942	0.994543
chr8	2593620	2593677	UCHL5_K562_rep01	1.73607	0.983976
chr8	2628720	2628773	SND1_K562_rep01	2.49908	0.97662
chr8	2611034	2611080	SAFB2_K562_rep01	1.46181	0.975509
chr8	2593397	2593441	AKAP8L_K562_rep02	2.17113	0.975356
chr8	2599618	2599642	NIPBL_K562_rep01	2.14852	0.972723
chr8	2600496	2600510	NIPBL_K562_rep01	2.14852	0.972723
chr8	2603460	2603477	NIPBL_K562_rep01	2.14852	0.972723
chr8	2651593	2651652	UCHL5_K562_rep02	1.82795	0.970873
chr8	2669111	2669140	UCHL5_K562_rep02	1.82795	0.970873
chr8	2670162	2670202	UCHL5_K562_rep02	1.82795	0.970873
chr8	2592270	2592315	PPIL4_K562_rep02	1.74067	0.970187
chr8	2624498	2624587	KHSRP_K562_rep02	1.80634	0.961205
chr8	2594509	2594591	TAF15_K562_rep02	1.99101	0.961015
chr8	2657105	2657132	ZRANB2_K562_rep02	2.59622	0.960276
chr8	2589421	2589442	SAFB2_K562_rep02	1.77663	0.959351
chr8	2592269	2592312	RBFOX2_K562_rep01	1.86247	0.958962
chr8	2603690	2603732	FASTKD2_K562_rep02	1.52256	0.954729
chr8	2591608	2591677	RBFOX2_K562_rep01	2.37704	0.952291
chr8	2606741	2606796	RBFOX2_K562_rep01	2.37704	0.952291
chr8	2607371	2607414	RBFOX2_K562_rep01	2.37704	0.952291
chr8	2670474	2670550	KHSRP_K562_rep01	2.37122	0.951631
chr8	2597983	2598030	PPIL4_K562_rep02	2.36216	0.950499
chr8	2607004	2607045	PPIL4_K562_rep02	2.36216	0.950499
chr8	2609692	2609733	SLTM_K562_rep01	2.04174	0.949105
chr8	2664914	2665003	KHSRP_K562_rep02	2.32092	0.943756
chr8	2602213	2602251	XRCC6_K562_rep02	1.58323	0.942612
chr8	2635858	2635937	KHDRBS1_K562_rep01	1.8085	0.93983
chr8	2607424	2607466	SLTM_K562_rep02	1.59054	0.93774
chr8	2609383	2609461	SAFB_K562_rep02	1.73179	0.937545
chr8	2592284	2592305	SAFB2_K562_rep02	2.2912	0.937354
chr8	2608474	2608489	SAFB2_K562_rep02	2.2912	0.937354
chr8	2621157	2621186	SAFB2_K562_rep02	2.2912	0.937354
chr8	2625991	2626020	SAFB2_K562_rep02	2.2912	0.937354
chr8	2652087	2652118	SAFB2_K562_rep02	2.2912	0.937354
chr8	2666023	2666060	SAFB2_K562_rep02	2.2912	0.937354
chr8	2674916	2674950	SAFB2_K562_rep02	2.2912	0.937354
chr8	2589976	2590005	LARP4_K562_rep02	2.08414	0.936266
chr8	2593985	2594013	LARP4_K562_rep02	2.08414	0.936266
chr8	2608948	2608962	LARP4_K562_rep02	2.08414	0.936266
chr8	2610753	2610787	LARP4_K562_rep02	2.08414	0.936266
chr8	2647474	2647512	LARP4_K562_rep02	2.08414	0.936266
chr8	2621438	2621467	LARP4_K562_rep02	2.08414	0.936266
chr8	2597182	2597216	SAFB2_K562_rep01	1.70574	0.933648
chr8	2609928	2609961	FMR1_K562_rep02	2.37619	0.927088
chr8	2671617	2671672	FMR1_K562_rep02	2.37619	0.927088
chr8	2590192	2590230	LARP4_K562_rep01	2.53136	0.925795
chr8	2592290	2592311	LARP4_K562_rep01	2.53136	0.925795
chr8	2594475	2594501	LARP4_K562_rep01	2.53136	0.925795
chr8	2594976	2595004	LARP4_K562_rep01	2.53136	0.925795
chr8	2604629	2604665	LARP4_K562_rep01	2.53136	0.925795
chr8	2606240	2606262	LARP4_K562_rep01	2.53136	0.925795
chr8	2607178	2607186	LARP4_K562_rep01	2.53136	0.925795
chr8	2607186	2607218	LARP4_K562_rep01	2.53136	0.925795
chr8	2610379	2610384	LARP4_K562_rep01	2.53136	0.925795
chr8	2610384	2610400	LARP4_K562_rep01	2.53136	0.925795
chr8	2616638	2616694	HNRNPL_K562_rep02	2.36665	0.924407
chr8	2620499	2620547	HNRNPL_K562_rep02	2.36665	0.924407
chr8	2591852	2591884	KHDRBS1_K562_rep01	2.36104	0.924246
chr8	2598758	2598838	KHDRBS1_K562_rep01	2.36104	0.924246
chr8	2635805	2635858	KHDRBS1_K562_rep01	2.36104	0.924246
chr8	2640502	2640536	KHDRBS1_K562_rep01	2.36104	0.924246
chr8	2589213	2589229	SAFB2_K562_rep02	2.42871	0.922654
chr8	2609406	2609415	SAFB2_K562_rep02	2.42871	0.922654
chr8	2635549	2635590	SAFB2_K562_rep02	2.42871	0.922654
chr8	2667954	2667974	SAFB2_K562_rep02	2.42871	0.922654
chr8	2670833	2670936	KHDRBS1_K562_rep02	1.72701	0.922413
chr8	2610535	2610575	SAFB2_K562_rep01	1.79885	0.920683
chr8	2665637	2665676	SAFB2_K562_rep01	1.79885	0.920683
chr8	2616640	2616692	AGGF1_K562_rep02	1.36682	0.916145
chr8	2607382	2607469	SAFB_K562_rep01	2.27462	0.91533
chr8	2612529	2612556	SAFB2_K562_rep01	2.25828	0.912346
chr8	2645677	2645711	SAFB2_K562_rep01	2.25828	0.912346
chr8	2665490	2665517	SAFB2_K562_rep01	2.25828	0.912346
chr8	2587920	2587983	UCHL5_K562_rep02	2.34253	0.912323
chr8	2594381	2594428	UCHL5_K562_rep02	2.34253	0.912323
chr8	2609707	2609735	UCHL5_K562_rep02	2.34253	0.912323
chr8	2650891	2650947	UCHL5_K562_rep02	2.34253	0.912323
chr8	2652875	2652924	UCHL5_K562_rep02	2.34253	0.912323
chr8	2664549	2664596	UCHL5_K562_rep02	2.34253	0.912323
chr8	2668320	2668357	UCHL5_K562_rep02	2.34253	0.912323
chr8	2671149	2671181	UCHL5_K562_rep02	2.34253	0.912323
chr8	2669662	2669712	YWHAG_K562_rep01	1.74598	0.91035
chr8	2612094	2612132	FTO_K562_rep01	2.49876	0.908728
chr8	2590534	2590568	TAF15_K562_rep01	2.32801	0.905831
chr8	2664157	2664201	TAF15_K562_rep01	2.32801	0.905831
chr8	2602624	2602666	TAF15_K562_rep02	2.57597	0.903046
chr8	2667908	2667961	TAF15_K562_rep02	2.57597	0.903046
chr8	2606267	2606304	DDX42_K562_rep01	2.02261	0.902078
chr8	2663524	2663566	RBFOX2_K562_rep02	2.51073	0.900084
chr8	2594571	2594622	SRSF1_K562_rep01	2.50954	0.899988
chr8	2621787	2621845	SRSF1_K562_rep01	2.50954	0.899988
chr8	2616300	2616336	KHDRBS1_K562_rep02	2.31197	0.899963
chr8	2608945	2608987	NOLC1_K562_rep01	2.49439	0.898623
chr8	2645549	2645603	AGGF1_K562_rep02	2.49235	0.898421
chr8	2595503	2595521	SAFB2_K562_rep01	2.38381	0.897973
chr8	2612217	2612241	SAFB2_K562_rep01	2.38381	0.897973
chr8	2622002	2622041	SAFB2_K562_rep01	2.38381	0.897973
chr8	2650896	2650936	SAFB2_K562_rep01	2.38381	0.897973
chr8	2652956	2652999	SAFB2_K562_rep01	2.38381	0.897973
chr8	2596470	2596527	SAFB_K562_rep02	2.40986	0.895084
chr8	2608243	2608288	SAFB_K562_rep02	2.40986	0.895084
chr8	2602195	2602236	PPIL4_K562_rep01	2.23487	0.892592
chr8	2669210	2669272	PPIL4_K562_rep01	2.23487	0.892592
chr8	2589662	2589678	TROVE2_K562_rep01	2.46373	0.890585
chr8	2592278	2592310	TROVE2_K562_rep01	2.46373	0.890585
chr8	2601302	2601359	BUD13_K562_rep01	2.43154	0.890409
chr8	2675365	2675405	RBM22_K562_rep01	2.44339	0.880143
chr8	2605113	2605166	PPIL4_K562_rep01	2.35035	0.877932
chr8	2609220	2609275	PPIL4_K562_rep01	2.35035	0.877932
chr8	2609347	2609389	UCHL5_K562_rep01	1.8356	0.87754
chr8	2609671	2609690	UCHL5_K562_rep01	1.8356	0.87754
chr8	2627485	2627522	TBRG4_K562_rep01	1.9761	0.876658
chr8	2595652	2595676	AKAP8L_K562_rep02	2.43417	0.875434
chr8	2598532	2598553	AKAP8L_K562_rep02	2.43417	0.875434
chr8	2600389	2600421	AKAP8L_K562_rep02	2.43417	0.875434
chr8	2607681	2607708	AKAP8L_K562_rep02	2.43417	0.875434
chr8	2608841	2608872	AKAP8L_K562_rep02	2.43417	0.875434
chr8	2623514	2623545	AKAP8L_K562_rep02	2.43417	0.875434
chr8	2666015	2666050	AKAP8L_K562_rep02	2.43417	0.875434
chr8	2668565	2668606	DROSHA_K562_rep02	1.96822	0.87239
chr8	2659510	2659560	TARDBP_K562_rep01	2.34017	0.871597
chr8	2667688	2667743	YWHAG_K562_rep01	2.33094	0.869281
chr8	2669225	2669304	FUS_K562_rep02	2.16592	0.868024
chr8	2588654	2588687	NIPBL_K562_rep01	1.56356	0.867477
chr8	2590236	2590246	EIF4G2_K562_rep02	2.40088	0.858553
chr8	2590246	2590279	EIF4G2_K562_rep02	2.40088	0.858553
chr8	2602630	2602680	AKAP8L_K562_rep02	1.58617	0.843028
chr8	2588803	2588861	SAFB2_K562_rep02	1.38431	0.840935
chr8	2602195	2602242	XRCC6_K562_rep01	1.45917	0.826225
chr8	2662265	2662311	TIA1_K562_rep01	2.42308	0.82545
chr8	2670489	2670555	CPSF6_K562_rep02	1.88274	0.820135
chr8	2607414	2607473	XRN2_K562_rep01	1.87026	0.818689
chr8	2603807	2603861	HLTF_K562_rep01	2.07845	0.815914
chr8	2604152	2604208	HLTF_K562_rep01	2.07845	0.815914
chr8	2589191	2589239	DROSHA_K562_rep02	1.38326	0.815851
chr8	2602195	2602236	HLTF_K562_rep01	2.15645	0.815229
chr8	2593756	2593794	TBRG4_K562_rep02	2.31202	0.814415
chr8	2626541	2626571	TBRG4_K562_rep02	2.31202	0.814415
chr8	2655425	2655501	ILF3_K562_rep01	2.25346	0.812031
chr8	2608977	2608993	SLTM_K562_rep01	2.30477	0.810872
chr8	2625283	2625319	SLTM_K562_rep01	2.30477	0.810872
chr8	2650897	2650934	SLTM_K562_rep01	2.30477	0.810872
chr8	2654496	2654531	SLTM_K562_rep01	2.30477	0.810872
chr8	2675487	2675516	SLTM_K562_rep01	2.30477	0.810872
chr8	2676051	2676087	SLTM_K562_rep01	2.30477	0.810872
chr8	2604114	2604154	AQR_K562_rep01	2.28017	0.798924
chr8	2652941	2652968	AQR_K562_rep01	2.28017	0.798924
chr8	2592091	2592122	GTF2F1_K562_rep02	2.27234	0.79514
chr8	2620150	2620179	GTF2F1_K562_rep02	2.27234	0.79514
chr8	2621137	2621154	GTF2F1_K562_rep02	2.27234	0.79514
chr8	2625624	2625693	KHSRP_K562_rep01	1.63425	0.794884
chr8	2663376	2663406	NPM1_K562_rep02	1.80767	0.78776
chr8	2592280	2592330	SLTM_K562_rep01	1.45677	0.786011
chr8	2596836	2596869	UCHL5_K562_rep01	2.51367	0.777671
chr8	2603368	2603401	UCHL5_K562_rep01	2.51367	0.777671
chr8	2611122	2611166	UCHL5_K562_rep01	2.51367	0.777671
chr8	2626101	2626143	UCHL5_K562_rep01	2.51367	0.777671
chr8	2671782	2671825	UCHL5_K562_rep01	2.51367	0.777671
chr8	2662153	2662197	GRWD1_K562_rep01	2.29373	0.777514
chr8	2648699	2648754	TARDBP_K562_rep02	2.30976	0.77745
chr8	2659516	2659577	TARDBP_K562_rep02	2.30976	0.77745
chr8	2635090	2635176	HNRNPL_K562_rep01	2.1917	0.771242
chr8	2605386	2605423	XRCC6_K562_rep02	1.58323	0.770089
chr8	2591331	2591398	SAFB_K562_rep02	1.52534	0.763952
chr8	2594516	2594559	RBM15_K562_rep01	2.3952	0.761811
chr8	2609918	2609947	RBM15_K562_rep01	2.3952	0.761811
chr8	2652699	2652744	ZNF622_K562_rep01	2.37342	0.758008
chr8	2666565	2666590	SLTM_K562_rep02	2.36815	0.757048
chr8	2671262	2671290	SLTM_K562_rep02	2.36815	0.757048
chr8	2671704	2671724	SLTM_K562_rep02	2.36815	0.757048
chr8	2624200	2624286	KHDRBS1_K562_rep02	1.53437	0.754943
chr8	2618999	2619005	SUB1_HepG2_rep02	1.73967	0.753298
chr8	2619005	2619024	SUB1_HepG2_rep02	1.73967	0.753298
chr8	2669228	2669267	SUB1_HepG2_rep02	1.73967	0.753298
chr8	2675099	2675182	UCHL5_K562_rep02	1.60556	0.752905
chr8	2589196	2589236	RBFOX2_K562_rep01	2.05511	0.746277
chr8	2598680	2598739	RBFOX2_K562_rep01	2.05511	0.746277
chr8	2602627	2602661	RBFOX2_K562_rep01	2.05511	0.746277
chr8	2666293	2666361	RBFOX2_K562_rep01	2.05511	0.746277
chr8	2602197	2602229	FASTKD2_K562_rep02	1.42945	0.74479
chr8	2589657	2589685	XRCC6_K562_rep01	1.72221	0.744584
chr8	2595534	2595571	XRCC6_K562_rep01	1.72221	0.744584
chr8	2595733	2595775	XRCC6_K562_rep01	1.72221	0.744584
chr8	2625555	2625600	KHSRP_K562_rep01	2.21921	0.744562
chr8	2600603	2600644	RBFOX2_K562_rep01	2.22504	0.744535
chr8	2594050	2594098	PPIL4_K562_rep02	2.21015	0.744528
chr8	2597848	2597893	PPIL4_K562_rep02	2.21015	0.744528
chr8	2602197	2602253	PPIL4_K562_rep02	2.21015	0.744528
chr8	2602450	2602497	PPIL4_K562_rep02	2.21015	0.744528
chr8	2594366	2594396	CPSF6_K562_rep02	2.29778	0.74284
chr8	2669946	2669990	CPSF6_K562_rep02	2.29778	0.74284
chr8	2636623	2636653	SAFB2_K562_rep02	2.1392	0.741069
chr8	2639197	2639239	SAFB2_K562_rep02	2.1392	0.741069
chr8	2642357	2642369	SAFB2_K562_rep02	2.1392	0.741069
chr8	2645237	2645267	SAFB2_K562_rep02	2.1392	0.741069
chr8	2645355	2645374	SAFB2_K562_rep02	2.1392	0.741069
chr8	2652766	2652794	SAFB2_K562_rep02	2.1392	0.741069
chr8	2653259	2653295	SAFB2_K562_rep02	2.1392	0.741069
chr8	2665446	2665478	SAFB2_K562_rep02	2.1392	0.741069
chr8	2612198	2612250	AGGF1_K562_rep02	1.71475	0.740614
chr8	2596273	2596327	XRN2_K562_rep01	2.2853	0.740062
chr8	2667275	2667315	XRN2_K562_rep01	2.2853	0.740062
chr8	2596823	2596850	DDX55_K562_rep01	1.70944	0.738248
chr8	2596474	2596525	HNRNPL_K562_rep02	2.07714	0.733603
chr8	2592961	2592990	KHDRBS1_K562_rep01	2.07153	0.732736
chr8	2602196	2602232	KHDRBS1_K562_rep01	2.07153	0.732736
chr8	2603181	2603214	KHDRBS1_K562_rep01	2.07153	0.732736
chr8	2609894	2609938	KHDRBS1_K562_rep01	2.07153	0.732736
chr8	2624871	2624922	KHDRBS1_K562_rep01	2.07153	0.732736
chr8	2640020	2640053	KHDRBS1_K562_rep01	2.07153	0.732736
chr8	2640552	2640583	KHDRBS1_K562_rep01	2.07153	0.732736
chr8	2665461	2665518	KHDRBS1_K562_rep01	2.07153	0.732736
chr8	2591401	2591432	GPKOW_K562_rep02	1.40646	0.732623
chr8	2662160	2662198	GPKOW_K562_rep02	1.40646	0.732623
chr8	2596298	2596346	LARP4_K562_rep01	1.9464	0.721303
chr8	2605864	2605911	LARP4_K562_rep01	1.9464	0.721303
chr8	2598812	2598839	SAFB2_K562_rep01	2.12077	0.71963
chr8	2599863	2599881	SAFB2_K562_rep01	2.12077	0.71963
chr8	2605605	2605613	SAFB2_K562_rep01	2.12077	0.71963
chr8	2611361	2611369	SAFB2_K562_rep01	2.12077	0.71963
chr8	2652161	2652195	SAFB2_K562_rep01	2.12077	0.71963
chr8	2666767	2666773	SAFB2_K562_rep01	2.12077	0.71963
chr8	2672587	2672621	SAFB2_K562_rep01	2.12077	0.71963
chr8	2675288	2675318	SAFB2_K562_rep01	2.12077	0.71963
chr8	2600686	2600775	SLTM_K562_rep02	1.36815	0.717969
chr8	2589192	2589232	KHDRBS1_K562_rep01	2.22354	0.717954
chr8	2591024	2591062	KHDRBS1_K562_rep01	2.22354	0.717954
chr8	2595811	2595830	KHDRBS1_K562_rep01	2.22354	0.717954
chr8	2605561	2605612	KHDRBS1_K562_rep01	2.22354	0.717954
chr8	2611592	2611633	KHDRBS1_K562_rep01	2.22354	0.717954
chr8	2635032	2635080	KHDRBS1_K562_rep01	2.22354	0.717954
chr8	2591956	2591997	PPIL4_K562_rep01	2.10934	0.701936
chr8	2598723	2598779	PPIL4_K562_rep01	2.10934	0.701936
chr8	2602616	2602657	PPIL4_K562_rep01	2.10934	0.701936
chr8	2608920	2608957	PPIL4_K562_rep01	2.10934	0.701936
chr8	2612152	2612208	PPIL4_K562_rep01	2.10934	0.701936
chr8	2618534	2618582	KHDRBS1_K562_rep02	2.18644	0.698665
chr8	2596489	2596525	GTF2F1_K562_rep01	2.12553	0.698607
chr8	2607411	2607457	GTF2F1_K562_rep01	2.12553	0.698607
chr8	2662159	2662212	PUM1_K562_rep01	1.22968	0.692848
chr8	2588169	2588212	SLTM_K562_rep01	1.71981	0.682021
chr8	2662170	2662220	PUM1_K562_rep02	1.19556	0.68152
chr8	2604602	2604675	HLTF_K562_rep01	1.49348	0.680708
chr8	2593757	2593784	SAFB2_K562_rep02	1.19167	0.680498
chr8	2611471	2611499	SAFB2_K562_rep02	1.2912	0.680227
chr8	2635573	2635616	FMR1_K562_rep02	2.05426	0.677224
chr8	2670778	2670803	FMR1_K562_rep02	2.05426	0.677224
chr8	2606762	2606798	GTF2F1_K562_rep02	1.68737	0.674121
chr8	2620000	2620048	GTF2F1_K562_rep02	1.68737	0.674121
chr8	2669767	2669808	APOBEC3C_K562_rep01	1.66504	0.668398
chr8	2596469	2596505	ZC3H11A_K562_rep02	1.66411	0.668155
chr8	2601576	2601586	UCHL5_K562_rep02	2.0206	0.666651
chr8	2607837	2607861	UCHL5_K562_rep02	2.0206	0.666651
chr8	2609525	2609557	UCHL5_K562_rep02	2.0206	0.666651
chr8	2646144	2646190	UCHL5_K562_rep02	2.0206	0.666651
chr8	2651083	2651113	UCHL5_K562_rep02	2.0206	0.666651
chr8	2651767	2651810	UCHL5_K562_rep02	2.0206	0.666651
chr8	2663733	2663770	UCHL5_K562_rep02	2.0206	0.666651
chr8	2667069	2667102	UCHL5_K562_rep02	2.0206	0.666651
chr8	2674989	2675036	UCHL5_K562_rep02	2.0206	0.666651
chr8	2666417	2666457	SAFB2_K562_rep01	1.21388	0.665743
chr8	2593321	2593440	FUS_K562_rep01	1.99763	0.665365
chr8	2596153	2596188	TAF15_K562_rep01	2.00608	0.66201
chr8	2596464	2596505	TAF15_K562_rep01	2.00608	0.66201
chr8	2604855	2604905	TAF15_K562_rep01	2.00608	0.66201
chr8	2613336	2613372	TAF15_K562_rep01	2.00608	0.66201
chr8	2621662	2621700	TAF15_K562_rep01	2.00608	0.66201
chr8	2671059	2671098	TAF15_K562_rep01	2.00608	0.66201
chr8	2671463	2671503	TAF15_K562_rep01	2.00608	0.66201
chr8	2618973	2619018	LSM11_K562_rep02	2.00184	0.660646
chr8	2594153	2594185	TAF15_K562_rep02	2.31294	0.660025
chr8	2601571	2601628	TAF15_K562_rep02	2.31294	0.660025
chr8	2621656	2621694	TAF15_K562_rep02	2.31294	0.660025
chr8	2670624	2670657	YWHAG_K562_rep02	2.29967	0.659887
chr8	2670486	2670533	RBFOX2_K562_rep02	2.24769	0.658209
chr8	2669174	2669226	SRSF1_K562_rep01	2.24651	0.65815
chr8	2594169	2594211	NOLC1_K562_rep01	2.23136	0.657313
chr8	2608238	2608279	NOLC1_K562_rep01	2.23136	0.657313
chr8	2646119	2646165	NOLC1_K562_rep01	2.23136	0.657313
chr8	2620036	2620081	AGGF1_K562_rep02	2.22932	0.657189
chr8	2669233	2669272	AGGF1_K562_rep02	2.22932	0.657189
chr8	2602204	2602241	DROSHA_K562_rep01	1.06984	0.656613
chr8	2607443	2607479	TROVE2_K562_rep02	1.48949	0.653326
chr8	2669302	2669333	BUD13_K562_rep01	2.16851	0.652252
chr8	2671250	2671303	UCHL5_K562_rep02	1.24299	0.651065
chr8	2601579	2601619	HLTF_K562_rep01	1.90852	0.64754
chr8	2662330	2662373	PRPF8_K562_rep01	1.58151	0.645155
chr8	2649053	2649114	TARDBP_K562_rep01	2.07714	0.640546
chr8	2609466	2609517	YWHAG_K562_rep01	2.06791	0.639094
chr8	2645400	2645446	YWHAG_K562_rep01	2.06791	0.639094
chr8	2651068	2651109	YWHAG_K562_rep01	2.06791	0.639094
chr8	2654752	2654805	YWHAG_K562_rep01	2.06791	0.639094
chr8	2667909	2667945	YWHAG_K562_rep01	2.06791	0.639094
chr8	2671408	2671456	YWHAG_K562_rep01	2.06791	0.639094
chr8	2598891	2598937	UCHL5_K562_rep01	1.51367	0.62444
chr8	2603811	2603849	LARP4_K562_rep01	1.36144	0.619961
chr8	2594721	2594751	RBFOX2_K562_rep01	1.37704	0.618459
chr8	2624490	2624550	KHSRP_K562_rep01	1.37122	0.617305
chr8	2597282	2597321	RBFOX2_K562_rep01	1.51454	0.617049
chr8	2600512	2600556	RBFOX2_K562_rep01	1.51454	0.617049
chr8	2657057	2657118	KHSRP_K562_rep02	1.45842	0.61564
chr8	2598682	2598713	SAFB2_K562_rep02	1.42871	0.6134
chr8	2666372	2666402	SAFB2_K562_rep02	1.42871	0.6134
chr8	2640167	2640207	KHDRBS1_K562_rep01	1.36104	0.60464
chr8	2670096	2670112	SLTM_K562_rep02	1.69008	0.598876
chr8	2667614	2667655	HNRNPK_K562_rep02	2.06484	0.598528
chr8	2591373	2591408	SAFB2_K562_rep01	1.38381	0.597364
chr8	2593398	2593417	SAFB2_K562_rep01	1.38381	0.597364
chr8	2663644	2663697	CPSF6_K562_rep02	1.6197	0.593696
chr8	2666376	2666443	LIN28B_K562_rep02	1.98592	0.59224
chr8	2662329	2662376	PRPF8_K562_rep02	1.60238	0.591917
chr8	2670404	2670449	RBM15_K562_rep02	1.97014	0.590509
chr8	2669156	2669197	AKAP8L_K562_rep02	1.26424	0.590189
chr8	2597876	2597914	SAFB2_K562_rep01	1.49929	0.587153
chr8	2668446	2668462	SAFB2_K562_rep01	1.49929	0.587153
chr8	2592269	2592309	PPIL4_K562_rep01	1.35035	0.58463
chr8	2606940	2606974	PPIL4_K562_rep01	1.35035	0.58463
chr8	2600882	2600950	NOLC1_K562_rep02	2.00857	0.564977
chr8	2598798	2598836	HNRNPL_K562_rep01	1.99905	0.564782
chr8	2671470	2671511	CSTF2T_K562_rep02	1.99606	0.564707
chr8	2593973	2594005	RBFOX2_K562_rep01	1.86247	0.555293
chr8	2663533	2663580	RBFOX2_K562_rep01	1.86247	0.555293
chr8	2667249	2667280	RBFOX2_K562_rep01	1.86247	0.555293
chr8	2596279	2596313	PPIL4_K562_rep02	1.84758	0.553541
chr8	2600184	2600211	PPIL4_K562_rep02	1.84758	0.553541
chr8	2589205	2589251	XRCC6_K562_rep02	0.998269	0.55161
chr8	2624216	2624252	KHSRP_K562_rep02	1.80634	0.548011
chr8	2626502	2626559	KHSRP_K562_rep02	1.80634	0.548011
chr8	2670452	2670527	KHSRP_K562_rep02	1.80634	0.548011
chr8	2614297	2614320	SAFB2_K562_rep02	1.77663	0.543438
chr8	2663752	2663766	SAFB2_K562_rep02	1.77663	0.543438
chr8	2666752	2666767	SAFB2_K562_rep02	1.77663	0.543438
chr8	2625827	2625843	SAFB2_K562_rep02	1.96928	0.541343
chr8	2636755	2636773	SAFB2_K562_rep02	1.96928	0.541343
chr8	2641677	2641707	SAFB2_K562_rep02	1.96928	0.541343
chr8	2625727	2625744	KHSRP_K562_rep02	1.99899	0.540769
chr8	2633211	2633243	KHSRP_K562_rep02	1.99899	0.540769
chr8	2663826	2663855	KHSRP_K562_rep02	1.99899	0.540769
chr8	2637004	2637032	KHDRBS1_K562_rep01	1.90161	0.540325
chr8	2641123	2641168	KHDRBS1_K562_rep01	1.90161	0.540325
chr8	2591481	2591515	PPIL4_K562_rep02	2.04023	0.538932
chr8	2608941	2608979	PPIL4_K562_rep02	2.04023	0.538932
chr8	2619424	2619509	PPIL4_K562_rep02	2.04023	0.538932
chr8	2651347	2651397	YWHAG_K562_rep02	1.56271	0.538833
chr8	2619332	2619398	AGGF1_K562_rep02	1.49235	0.535977
chr8	2589654	2589694	SAFB_K562_rep02	1.8249	0.535386
chr8	2597474	2597517	SAFB_K562_rep02	1.8249	0.535386
chr8	2606489	2606531	SAFB_K562_rep02	1.8249	0.535386
chr8	2616881	2616900	SAFB2_K562_rep01	1.79885	0.532841
chr8	2626045	2626068	SAFB2_K562_rep01	1.79885	0.532841
chr8	2601316	2601363	AKAP8L_K562_rep02	1.17113	0.52813
chr8	2591990	2592026	KHDRBS1_K562_rep02	1.89694	0.524269
chr8	2616826	2616868	KHDRBS1_K562_rep02	1.89694	0.524269
chr8	2634512	2634567	KHDRBS1_K562_rep02	1.89694	0.524269
chr8	2664675	2664718	KHDRBS1_K562_rep02	1.89694	0.524269
chr8	2597071	2597093	LARP4_K562_rep02	0.914212	0.523603
chr8	2588928	2588980	PPIL4_K562_rep01	1.81984	0.52197
chr8	2589192	2589241	PPIL4_K562_rep01	1.81984	0.52197
chr8	2590137	2590161	PPIL4_K562_rep01	1.81984	0.52197
chr8	2591850	2591885	PPIL4_K562_rep01	1.81984	0.52197
chr8	2594046	2594084	PPIL4_K562_rep01	1.81984	0.52197
chr8	2597277	2597311	PPIL4_K562_rep01	1.81984	0.52197
chr8	2601461	2601502	PPIL4_K562_rep01	1.81984	0.52197
chr8	2611942	2611982	PPIL4_K562_rep01	1.81984	0.52197
chr8	2608439	2608489	SAFB_K562_rep01	1.98511	0.521724
chr8	2608412	2608447	SAFB_K562_rep02	1.99482	0.521103
chr8	2607374	2607415	RBM15_K562_rep01	1.13216	0.517431
chr8	2593752	2593784	SAFB2_K562_rep01	1.12077	0.515429
chr8	2591157	2591183	ZC3H11A_K562_rep02	2.24907	0.514653
chr8	2597029	2597054	ZC3H11A_K562_rep02	2.24907	0.514653
chr8	2606367	2606398	ZC3H11A_K562_rep02	2.24907	0.514653
chr8	2634673	2634703	ZC3H11A_K562_rep02	2.24907	0.514653
chr8	2670720	2670759	ZC3H11A_K562_rep02	2.24907	0.514653
chr8	2622650	2622687	PUM1_K562_rep01	2.22968	0.513779
chr8	2670047	2670077	PTBP1_K562_rep02	2.20235	0.512341
chr8	2670424	2670442	SLTM_K562_rep02	1.10511	0.51086
chr8	2671944	2672016	FUS_K562_rep02	1.78741	0.509582
chr8	2587936	2587972	DDX6_K562_rep02	2.14162	0.508289
chr8	2594719	2594757	PPIL4_K562_rep01	1.97184	0.506635
chr8	2605691	2605728	PPIL4_K562_rep01	1.97184	0.506635
chr8	2607177	2607216	PPIL4_K562_rep01	1.97184	0.506635
chr8	2613331	2613388	PPIL4_K562_rep01	1.97184	0.506635
chr8	2600546	2600600	SLTM_K562_rep01	1.04174	0.505409
chr8	2589196	2589229	UCHL5_K562_rep01	2.09864	0.504726
chr8	2604802	2604823	UCHL5_K562_rep01	2.09864	0.504726
chr8	2606781	2606811	UCHL5_K562_rep01	2.09864	0.504726
chr8	2612634	2612667	UCHL5_K562_rep01	2.09864	0.504726
chr8	2650929	2650957	UCHL5_K562_rep01	2.09864	0.504726
chr8	2651123	2651152	UCHL5_K562_rep01	2.09864	0.504726
chr8	2662106	2662117	UCHL5_K562_rep01	2.09864	0.504726
chr8	2663901	2663936	UCHL5_K562_rep01	2.09864	0.504726
chr8	2667998	2668025	UCHL5_K562_rep01	2.09864	0.504726
chr8	2628822	2628859	DGCR8_K562_rep02	2.08858	0.50381
chr8	2602195	2602236	ZNF622_K562_rep02	2.00841	0.495449
chr8	2621806	2621824	ZNF622_K562_rep02	2.00841	0.495449
chr8	2668304	2668340	ZNF622_K562_rep02	2.00841	0.495449
chr8	2594403	2594489	HNRNPC_K562_rep01	1.69523	0.495421
chr8	2602195	2602241	FUS_K562_rep01	1.77524	0.492902
chr8	2608248	2608278	RBM15_K562_rep01	1.98016	0.492069
chr8	2646521	2646553	RBM15_K562_rep01	1.98016	0.492069
chr8	2647628	2647669	RBM15_K562_rep01	1.98016	0.492069
chr8	2671608	2671643	RBM15_K562_rep01	1.98016	0.492069
chr8	2671922	2671947	RBM15_K562_rep01	1.98016	0.492069
chr8	2664833	2664863	ZNF622_K562_rep01	1.95838	0.489315
chr8	2668888	2668898	ZNF622_K562_rep01	1.95838	0.489315
chr8	2587966	2588003	SLTM_K562_rep02	1.95311	0.48863
chr8	2603037	2603074	SLTM_K562_rep02	1.95311	0.48863
chr8	2611291	2611303	SLTM_K562_rep02	1.95311	0.48863
chr8	2651600	2651631	SLTM_K562_rep02	1.95311	0.48863
chr8	2653035	2653048	SLTM_K562_rep02	1.95311	0.48863
chr8	2654787	2654825	SLTM_K562_rep02	1.95311	0.48863
chr8	2672084	2672099	SLTM_K562_rep02	1.95311	0.48863
chr8	2672286	2672321	SLTM_K562_rep02	1.95311	0.48863
chr8	2675259	2675290	SLTM_K562_rep02	1.95311	0.48863
chr8	2645137	2645167	METAP2_K562_rep01	1.91354	0.483256
chr8	2666149	2666172	METAP2_K562_rep01	1.91354	0.483256
chr8	2605124	2605159	NCBP2_K562_rep02	1.89768	0.480994
chr8	2591843	2591876	AKAP8L_K562_rep01	1.88916	0.479752
chr8	2605691	2605729	CPSF6_K562_rep02	1.88274	0.478806
chr8	2612154	2612184	CPSF6_K562_rep02	1.88274	0.478806
chr8	2624310	2624343	CPSF6_K562_rep02	1.88274	0.478806
chr8	2652075	2652109	CPSF6_K562_rep02	1.88274	0.478806
chr8	2663754	2663791	CPSF6_K562_rep02	1.88274	0.478806
chr8	2665441	2665476	CPSF6_K562_rep02	1.88274	0.478806
chr8	2675098	2675136	CPSF6_K562_rep02	1.88274	0.478806
chr8	2612148	2612185	XRN2_K562_rep01	1.87026	0.476938
chr8	2619375	2619419	XRN2_K562_rep01	1.87026	0.476938
chr8	2653252	2653286	XRN2_K562_rep01	1.87026	0.476938
chr8	2607236	2607242	MTPAP_K562_rep02	1.86779	0.476564
chr8	2607242	2607263	MTPAP_K562_rep02	1.86779	0.476564
chr8	2662173	2662206	MTPAP_K562_rep02	1.86779	0.476564
chr8	2664154	2664181	MTPAP_K562_rep02	1.86779	0.476564
chr8	2608194	2608225	SAFB2_K562_rep02	0.876166	0.473932
chr8	2622807	2622831	EXOSC5_K562_rep01	1.84618	0.473233
chr8	2608970	2609007	TROVE2_K562_rep02	1.65942	0.472846
chr8	2614927	2614954	TROVE2_K562_rep02	1.65942	0.472846
chr8	2599584	2599648	SAFB2_K562_rep02	0.969275	0.468157
chr8	2606943	2606978	SAFB2_K562_rep02	0.969275	0.468157
chr8	2611012	2611164	HLTF_K562_rep02	1.84084	0.466748
chr8	2598550	2598593	HNRNPL_K562_rep01	1.1917	0.461932
chr8	2594744	2594781	LARP4_K562_rep01	1.53136	0.4609
chr8	2600608	2600625	LARP4_K562_rep01	1.53136	0.4609
chr8	2606732	2606760	LARP4_K562_rep01	1.53136	0.4609
chr8	2633365	2633400	SND1_K562_rep01	1.76211	0.459327
chr8	2594048	2594081	RBFOX2_K562_rep01	1.22504	0.45398
chr8	2607429	2607473	RBFOX2_K562_rep01	1.22504	0.45398
chr8	2608240	2608291	RBFOX2_K562_rep01	1.22504	0.45398
chr8	2639637	2639655	NSUN2_K562_rep01	1.72833	0.453352
chr8	2588112	2588166	PPIL4_K562_rep02	1.21015	0.452649
chr8	2608845	2608883	PPIL4_K562_rep02	1.21015	0.452649
chr8	2594735	2594765	GTF2F1_K562_rep01	1.71049	0.450115
chr8	2628108	2628141	GTF2F1_K562_rep01	1.71049	0.450115
chr8	2654167	2654176	GTF2F1_K562_rep01	1.71049	0.450115
chr8	2654176	2654206	GTF2F1_K562_rep01	1.71049	0.450115
chr8	2590566	2590601	AKAP8L_K562_rep02	1.43417	0.448531
chr8	2594410	2594440	AKAP8L_K562_rep02	1.43417	0.448531
chr8	2611629	2611666	AKAP8L_K562_rep02	1.43417	0.448531
chr8	2593385	2593412	DROSHA_K562_rep02	1.38326	0.447042
chr8	2624597	2624641	DROSHA_K562_rep02	1.38326	0.447042
chr8	2634022	2634069	KHSRP_K562_rep02	1.32092	0.445111
chr8	2590327	2590354	PABPC4_K562_rep01	1.40238	0.443921
chr8	2606930	2606967	PPIL4_K562_rep02	1.36216	0.443764
chr8	2616071	2616095	KHDRBS1_K562_rep01	1.22354	0.443204
chr8	2639550	2639587	KHDRBS1_K562_rep01	1.22354	0.443204
chr8	2628733	2628761	FMR1_K562_rep02	1.63922	0.436677
chr8	2631071	2631097	FMR1_K562_rep02	1.63922	0.436677
chr8	2669268	2669295	FMR1_K562_rep02	1.63922	0.436677
chr8	2669547	2669571	FMR1_K562_rep02	1.63922	0.436677
chr8	2591031	2591061	SAFB2_K562_rep01	1.25828	0.43457
chr8	2612825	2612922	SAFB_K562_rep01	1.27462	0.434545
chr8	2592272	2592324	SAFB_K562_rep02	1.28433	0.434433
chr8	2594462	2594527	SAFB_K562_rep02	1.28433	0.434433
chr8	2618954	2618986	HNRNPK_K562_rep01	1.62096	0.433114
chr8	2589084	2589147	KHDRBS1_K562_rep02	1.18644	0.432296
chr8	2589802	2589830	UCHL5_K562_rep02	1.60556	0.430078
chr8	2601975	2601984	UCHL5_K562_rep02	1.60556	0.430078
chr8	2611187	2611199	UCHL5_K562_rep02	1.60556	0.430078
chr8	2622113	2622150	UCHL5_K562_rep02	1.60556	0.430078
chr8	2624677	2624710	UCHL5_K562_rep02	1.60556	0.430078
chr8	2667551	2667567	UCHL5_K562_rep02	1.60556	0.430078
chr8	2667787	2667811	UCHL5_K562_rep02	1.60556	0.430078
chr8	2677147	2677173	UCHL5_K562_rep02	1.60556	0.430078
chr8	2588939	2588972	TBRG4_K562_rep02	1.31202	0.429444
chr8	2590541	2590568	SLTM_K562_rep01	1.30477	0.4282
chr8	2607995	2608030	SLTM_K562_rep01	1.30477	0.4282
chr8	2621234	2621266	SLTM_K562_rep01	1.30477	0.4282
chr8	2628593	2628627	SLTM_K562_rep01	1.30477	0.4282
chr8	2652394	2652398	SLTM_K562_rep01	1.30477	0.4282
chr8	2673469	2673499	SLTM_K562_rep01	1.30477	0.4282
chr8	2627043	2627076	EWSR1_K562_rep01	1.59565	0.428106
chr8	2587914	2587948	TAF15_K562_rep01	1.59105	0.427187
chr8	2588786	2588817	TAF15_K562_rep01	1.59105	0.427187
chr8	2589654	2589693	TAF15_K562_rep01	1.59105	0.427187
chr8	2590261	2590290	TAF15_K562_rep01	1.59105	0.427187
chr8	2593537	2593569	TAF15_K562_rep01	1.59105	0.427187
chr8	2594753	2594775	TAF15_K562_rep01	1.59105	0.427187
chr8	2595499	2595524	TAF15_K562_rep01	1.59105	0.427187
chr8	2595773	2595796	TAF15_K562_rep01	1.59105	0.427187
chr8	2600157	2600190	TAF15_K562_rep01	1.59105	0.427187
chr8	2601326	2601360	TAF15_K562_rep01	1.59105	0.427187
chr8	2601928	2601960	TAF15_K562_rep01	1.59105	0.427187
chr8	2608253	2608288	TAF15_K562_rep01	1.59105	0.427187
chr8	2610337	2610371	TAF15_K562_rep01	1.59105	0.427187
chr8	2612657	2612687	TAF15_K562_rep01	1.59105	0.427187
chr8	2615812	2615838	TAF15_K562_rep01	1.59105	0.427187
chr8	2621491	2621527	TAF15_K562_rep01	1.59105	0.427187
chr8	2622232	2622260	TAF15_K562_rep01	1.59105	0.427187
chr8	2636612	2636649	TAF15_K562_rep01	1.59105	0.427187
chr8	2644721	2644758	TAF15_K562_rep01	1.59105	0.427187
chr8	2647123	2647163	TAF15_K562_rep01	1.59105	0.427187
chr8	2647834	2647871	TAF15_K562_rep01	1.59105	0.427187
chr8	2669425	2669457	TAF15_K562_rep01	1.59105	0.427187
chr8	2671717	2671738	TAF15_K562_rep01	1.59105	0.427187
chr8	2590539	2590572	LSM11_K562_rep02	1.5868	0.426338
chr8	2604857	2604888	LSM11_K562_rep02	1.5868	0.426338
chr8	2634845	2634867	LSM11_K562_rep02	1.5868	0.426338
chr8	2668011	2668056	CPSF6_K562_rep01	1.99429	0.425963
chr8	2671545	2671588	CPSF6_K562_rep01	1.99429	0.425963
chr8	2597159	2597206	TAF15_K562_rep02	1.99101	0.425955
chr8	2607795	2607839	TAF15_K562_rep02	1.99101	0.425955
chr8	2612628	2612673	TAF15_K562_rep02	1.99101	0.425955
chr8	2627063	2627101	TAF15_K562_rep02	1.99101	0.425955
chr8	2610884	2610921	BUD13_K562_rep02	1.99092	0.425954
chr8	2668894	2668922	BUD13_K562_rep02	1.99092	0.425954
chr8	2608842	2608880	PPIL4_K562_rep01	1.23487	0.42594
chr8	2590221	2590247	YWHAG_K562_rep02	1.97774	0.425883
chr8	2608250	2608285	YWHAG_K562_rep02	1.97774	0.425883
chr8	2608847	2608879	YWHAG_K562_rep02	1.97774	0.425883
chr8	2667754	2667793	MTPAP_K562_rep01	1.93488	0.425233
chr8	2667282	2667318	METAP2_K562_rep02	1.28645	0.425008
chr8	2609751	2609791	SRSF1_K562_rep01	1.92458	0.424982
chr8	2600154	2600186	NOLC1_K562_rep01	1.90943	0.424546
chr8	2600372	2600396	NOLC1_K562_rep01	1.90943	0.424546
chr8	2600888	2600926	NOLC1_K562_rep01	1.90943	0.424546
chr8	2602195	2602232	NOLC1_K562_rep01	1.90943	0.424546
chr8	2609571	2609611	NOLC1_K562_rep01	1.90943	0.424546
chr8	2621785	2621823	AGGF1_K562_rep02	1.90739	0.424482
chr8	2594730	2594749	AQR_K562_rep01	1.28017	0.423898
chr8	2602203	2602238	AQR_K562_rep01	1.28017	0.423898
chr8	2601452	2601492	TRA2A_K562_rep02	1.8806	0.423502
chr8	2671491	2671532	CSTF2T_K562_rep01	1.84258	0.421696
chr8	2626511	2626547	QKI_K562_rep02	1.25665	0.419669
chr8	2605691	2605700	APOBEC3C_K562_rep01	1.25	0.418453
chr8	2605700	2605730	APOBEC3C_K562_rep01	1.25	0.418453
chr8	2588123	2588130	ZC3H11A_K562_rep02	1.24907	0.418282
chr8	2588130	2588161	ZC3H11A_K562_rep02	1.24907	0.418282
chr8	2590251	2590278	ZC3H11A_K562_rep02	1.24907	0.418282
chr8	2595847	2595879	ZC3H11A_K562_rep02	1.24907	0.418282
chr8	2617912	2617948	ZC3H11A_K562_rep02	1.24907	0.418282
chr8	2595737	2595780	FASTKD2_K562_rep02	1.10752	0.416084
chr8	2609242	2609269	FASTKD2_K562_rep02	1.10752	0.416084
chr8	2668004	2668049	TARDBP_K562_rep01	1.75521	0.415757
chr8	2609603	2609653	UCHL5_K562_rep02	0.827954	0.415253
chr8	2607498	2607532	YWHAG_K562_rep01	1.74598	0.41499
chr8	2600285	2600321	XRCC6_K562_rep01	1.13724	0.41476
chr8	2614751	2614792	ZC3H8_K562_rep02	1.73998	0.414477
chr8	2591391	2591401	GPKOW_K562_rep02	1.08453	0.413233
chr8	2600281	2600309	PTBP1_K562_rep02	1.20235	0.409501
chr8	2666025	2666057	PTBP1_K562_rep02	1.20235	0.409501
chr8	2675184	2675208	PTBP1_K562_rep02	1.20235	0.409501
chr8	2666604	2666640	HNRNPM_K562_rep01	1.67892	0.40865
chr8	2600523	2600594	FUS_K562_rep01	1.09717	0.405253
chr8	2590530	2590566	DDX6_K562_rep02	1.14162	0.397533
chr8	2591618	2591650	DROSHA_K562_rep02	0.968222	0.392692
chr8	2592271	2592304	DROSHA_K562_rep02	0.968222	0.392692
chr8	2594739	2594777	DROSHA_K562_rep02	0.968222	0.392692
chr8	2606269	2606304	DROSHA_K562_rep02	0.968222	0.392692
chr8	2606390	2606429	UCHL5_K562_rep01	1.09864	0.388737
chr8	2608428	2608436	UCHL5_K562_rep01	1.09864	0.388737
chr8	2610753	2610789	UCHL5_K562_rep01	1.09864	0.388737
chr8	2620026	2620055	UCHL5_K562_rep01	1.09864	0.388737
chr8	2625139	2625169	UCHL5_K562_rep01	1.09864	0.388737
chr8	2651066	2651099	UCHL5_K562_rep01	1.09864	0.388737
chr8	2666009	2666048	UCHL5_K562_rep01	1.09864	0.388737
chr8	2670885	2670925	UCHL5_K562_rep01	1.09864	0.388737
chr8	2591338	2591379	HNRNPK_K562_rep02	1.80181	0.385816
chr8	2588313	2588370	ILF3_K562_rep01	1.76803	0.385368
chr8	2590522	2590581	ILF3_K562_rep01	1.76803	0.385368
chr8	2601601	2601619	RBM15_K562_rep02	1.7071	0.383538
chr8	2601754	2601794	RBM15_K562_rep02	1.7071	0.383538
chr8	2610994	2611042	ZNF622_K562_rep01	1.37342	0.383003
chr8	2602615	2602666	KHDRBS1_K562_rep01	0.901608	0.382139
chr8	2628661	2628696	TARDBP_K562_rep02	1.63169	0.379512
chr8	2591881	2592002	TAF15_K562_rep01	0.85408	0.378689
chr8	2668524	2668570	CPSF6_K562_rep02	1.29778	0.378565
chr8	2669271	2669317	GRWD1_K562_rep01	1.61565	0.378414
chr8	2662409	2662449	PRPF8_K562_rep02	1.28046	0.377273
chr8	2588919	2588980	SAFB_K562_rep01	0.930667	0.377052
chr8	2621772	2621836	SRSF1_K562_rep02	1.54959	0.373045
chr8	2592277	2592313	DDX52_K562_rep02	0.815384	0.372043
chr8	2662756	2662792	NIPBL_K562_rep01	0.826592	0.371002
chr8	2612853	2612889	HNRNPL_K562_rep01	1.51363	0.369577
chr8	2616645	2616692	HNRNPL_K562_rep01	1.51363	0.369577
chr8	2637852	2637897	HNRNPL_K562_rep01	1.51363	0.369577
chr8	2608845	2608889	SND1_K562_rep01	1.17715	0.367549
chr8	2620024	2620061	HNRNPL_K562_rep01	1.77666	0.362308
chr8	2637575	2637637	HNRNPL_K562_rep01	1.77666	0.362308
chr8	2667132	2667188	HNRNPL_K562_rep01	1.77666	0.362308
chr8	2667536	2667588	HNRNPL_K562_rep01	1.77666	0.362308
chr8	2597014	2597072	NOLC1_K562_rep02	1.78618	0.36208
chr8	2600267	2600299	NOLC1_K562_rep02	1.78618	0.36208
chr8	2645841	2645886	NOLC1_K562_rep02	1.78618	0.36208
chr8	2669171	2669216	NOLC1_K562_rep02	1.78618	0.36208
chr8	2596586	2596602	RBFOX2_K562_rep01	1.64008	0.361911
chr8	2597897	2597917	RBFOX2_K562_rep01	1.64008	0.361911
chr8	2601940	2601950	RBFOX2_K562_rep01	1.64008	0.361911
chr8	2605383	2605410	RBFOX2_K562_rep01	1.64008	0.361911
chr8	2667344	2667378	RBFOX2_K562_rep01	1.64008	0.361911
chr8	2667923	2667938	RBFOX2_K562_rep01	1.64008	0.361911
chr8	2670262	2670306	RBFOX2_K562_rep01	1.64008	0.361911
chr8	2624411	2624456	KHSRP_K562_rep01	1.63425	0.361744
chr8	2631033	2631074	KHSRP_K562_rep01	1.63425	0.361744
chr8	2594703	2594738	PPIL4_K562_rep02	1.62519	0.361459
chr8	2597291	2597318	PPIL4_K562_rep02	1.62519	0.361459
chr8	2597436	2597448	PPIL4_K562_rep02	1.62519	0.361459
chr8	2603452	2603485	PPIL4_K562_rep02	1.62519	0.361459
chr8	2603825	2603867	PPIL4_K562_rep02	1.62519	0.361459
chr8	2605573	2605611	PPIL4_K562_rep02	1.62519	0.361459
chr8	2605690	2605728	PPIL4_K562_rep02	1.62519	0.361459
chr8	2609169	2609195	PPIL4_K562_rep02	1.62519	0.361459
chr8	2611355	2611388	PPIL4_K562_rep02	1.62519	0.361459
chr8	2612636	2612671	PPIL4_K562_rep02	1.62519	0.361459
chr8	2590947	2590983	KHSRP_K562_rep02	1.58395	0.359798
chr8	2656897	2656925	KHSRP_K562_rep02	1.58395	0.359798
chr8	2667767	2667831	KHSRP_K562_rep02	1.58395	0.359798
chr8	2619882	2619900	SAFB2_K562_rep02	1.55424	0.358239
chr8	2672284	2672286	SAFB2_K562_rep02	1.55424	0.358239
chr8	2676870	2676899	SAFB2_K562_rep02	1.55424	0.358239
chr8	2677079	2677087	SAFB2_K562_rep02	1.55424	0.358239
chr8	2665910	2665953	ZC3H11A_K562_rep02	1.07914	0.355289
chr8	2589157	2589198	HNRNPL_K562_rep02	1.49218	0.354045
chr8	2619279	2619302	HNRNPL_K562_rep02	1.49218	0.354045
chr8	2667539	2667584	HNRNPL_K562_rep02	1.49218	0.354045
chr8	2602406	2602425	KHDRBS1_K562_rep01	1.48657	0.353606
chr8	2603385	2603412	KHDRBS1_K562_rep01	1.48657	0.353606
chr8	2607175	2607207	KHDRBS1_K562_rep01	1.48657	0.353606
chr8	2615183	2615196	KHDRBS1_K562_rep01	1.48657	0.353606
chr8	2619266	2619296	KHDRBS1_K562_rep01	1.48657	0.353606
chr8	2625694	2625728	KHDRBS1_K562_rep01	1.48657	0.353606
chr8	2636742	2636768	KHDRBS1_K562_rep01	1.48657	0.353606
chr8	2641902	2641950	KHDRBS1_K562_rep01	1.48657	0.353606
chr8	2642017	2642045	KHDRBS1_K562_rep01	1.48657	0.353606
chr8	2642102	2642132	KHDRBS1_K562_rep01	1.48657	0.353606
chr8	2677064	2677110	KHDRBS1_K562_rep01	1.48657	0.353606
chr8	2594271	2594301	SAFB_K562_rep02	1.63225	0.348027
chr8	2608850	2608880	SAFB_K562_rep02	1.63225	0.348027
chr8	2623397	2623445	SAFB_K562_rep02	1.63225	0.348027
chr8	2666015	2666065	SAFB_K562_rep02	1.63225	0.348027
chr8	2669676	2669730	SAFB_K562_rep02	1.63225	0.348027
chr8	2671343	2671388	SAFB_K562_rep02	1.63225	0.348027
chr8	2602738	2602787	SAFB_K562_rep01	1.62254	0.347959
chr8	2609459	2609520	SAFB_K562_rep01	1.62254	0.347959
chr8	2620273	2620331	SAFB_K562_rep01	1.62254	0.347959
chr8	2622169	2622183	SAFB2_K562_rep01	1.6062	0.347764
chr8	2651394	2651405	SAFB2_K562_rep01	1.6062	0.347764
chr8	2605472	2605497	KHDRBS1_K562_rep01	1.70896	0.347329
chr8	2618532	2618575	KHDRBS1_K562_rep01	1.70896	0.347329
chr8	2621600	2621648	KHDRBS1_K562_rep01	1.70896	0.347329
chr8	2638342	2638361	KHDRBS1_K562_rep01	1.70896	0.347329
chr8	2654289	2654334	KHDRBS1_K562_rep01	1.70896	0.347329
chr8	2664506	2664532	KHDRBS1_K562_rep01	1.70896	0.347329
chr8	2664680	2664717	KHDRBS1_K562_rep01	1.70896	0.347329
chr8	2668535	2668583	KHDRBS1_K562_rep01	1.70896	0.347329
chr8	2637381	2637446	HNRNPL_K562_rep02	1.71457	0.347191
chr8	2637804	2637868	HNRNPL_K562_rep02	1.71457	0.347191
chr8	2589196	2589246	UCHL5_K562_rep02	1.0206	0.346943
chr8	2602673	2602715	UCHL5_K562_rep02	1.0206	0.346943
chr8	2609824	2609852	UCHL5_K562_rep02	1.0206	0.346943
chr8	2666293	2666342	UCHL5_K562_rep02	1.0206	0.346943
chr8	2591844	2591879	KHDRBS1_K562_rep02	1.53437	0.345756
chr8	2605009	2605044	KHDRBS1_K562_rep02	1.53437	0.345756
chr8	2610765	2610796	KHDRBS1_K562_rep02	1.53437	0.345756
chr8	2618293	2618326	KHDRBS1_K562_rep02	1.53437	0.345756
chr8	2621149	2621190	KHDRBS1_K562_rep02	1.53437	0.345756
chr8	2639232	2639288	KHDRBS1_K562_rep02	1.53437	0.345756
chr8	2640575	2640604	KHDRBS1_K562_rep02	1.53437	0.345756
chr8	2673057	2673089	KHDRBS1_K562_rep02	1.53437	0.345756
chr8	2591934	2591986	DDX6_K562_rep02	0.971691	0.345316
chr8	2591028	2591063	TAF15_K562_rep01	1.00608	0.344725
chr8	2594477	2594514	TAF15_K562_rep01	1.00608	0.344725
chr8	2602195	2602235	TAF15_K562_rep01	1.00608	0.344725
chr8	2636443	2636477	TAF15_K562_rep01	1.00608	0.344725
chr8	2650297	2650339	TAF15_K562_rep01	1.00608	0.344725
chr8	2670510	2670562	CPSF6_K562_rep01	1.31622	0.343776
chr8	2591867	2591906	TAF15_K562_rep02	1.31294	0.343767
chr8	2596461	2596520	AGGF1_K562_rep02	1.22932	0.342168
chr8	2600851	2600865	PPIL4_K562_rep01	1.45727	0.341594
chr8	2601147	2601175	PPIL4_K562_rep01	1.45727	0.341594
chr8	2605392	2605408	PPIL4_K562_rep01	1.45727	0.341594
chr8	2605860	2605891	PPIL4_K562_rep01	1.45727	0.341594
chr8	2612617	2612648	PPIL4_K562_rep01	1.45727	0.341594
chr8	2651066	2651106	PPIL4_K562_rep01	1.45727	0.341594
chr8	2668775	2668803	PPIL4_K562_rep01	1.45727	0.341594
chr8	2671619	2671667	PPIL4_K562_rep01	1.45727	0.341594
chr8	2672357	2672405	PPIL4_K562_rep01	1.45727	0.341594
chr8	2597282	2597319	UCHL5_K562_rep01	0.928712	0.340288
chr8	2605488	2605530	UCHL5_K562_rep01	0.928712	0.340288
chr8	2645443	2645489	UCHL5_K562_rep01	0.928712	0.340288
chr8	2670016	2670046	UCHL5_K562_rep01	0.928712	0.340288
chr8	2590542	2590578	PPIL4_K562_rep01	1.64991	0.337012
chr8	2595280	2595303	PPIL4_K562_rep01	1.64991	0.337012
chr8	2598336	2598366	PPIL4_K562_rep01	1.64991	0.337012
chr8	2598879	2598912	PPIL4_K562_rep01	1.64991	0.337012
chr8	2598209	2598268	SAFB2_K562_rep01	0.705737	0.334799
chr8	2599581	2599618	SAFB2_K562_rep01	0.705737	0.334799
chr8	2589185	2589233	KHDRBS1_K562_rep02	1.72701	0.3343
chr8	2602195	2602236	KHDRBS1_K562_rep02	1.72701	0.3343
chr8	2616352	2616379	KHDRBS1_K562_rep02	1.72701	0.3343
chr8	2635534	2635589	KHDRBS1_K562_rep02	1.72701	0.3343
chr8	2637578	2637617	KHDRBS1_K562_rep02	1.72701	0.3343
chr8	2641672	2641714	KHDRBS1_K562_rep02	1.72701	0.3343
chr8	2602346	2602389	HNRNPC_K562_rep01	1.40573	0.325412
chr8	2592269	2592311	XRCC6_K562_rep01	0.815316	0.324108
chr8	2602617	2602660	HLTF_K562_rep01	1.36795	0.31532
chr8	2610985	2611087	HLTF_K562_rep01	1.36795	0.31532
chr8	2604341	2604372	HLTF_K562_rep01	1.49348	0.314961
chr8	2597167	2597206	SLTM_K562_rep01	0.719807	0.312902
chr8	2587837	2587977	HLTF_K562_rep01	1.60896	0.307928
chr8	2628128	2628203	HNRNPL_K562_rep01	0.999054	0.299371
chr8	2606715	2606768	TAF15_K562_rep01	0.743048	0.29508
chr8	2663371	2663410	RBFOX2_K562_rep02	0.925767	0.293185
chr8	2599597	2599638	RBFOX2_K562_rep01	1.05511	0.292015
chr8	2605883	2605928	DROSHA_K562_rep02	0.575904	0.292
chr8	2634059	2634148	KHSRP_K562_rep01	1.04929	0.291912
chr8	2674007	2674066	KHSRP_K562_rep01	1.04929	0.291912
chr8	2598916	2598934	SAFB2_K562_rep02	0.969275	0.289147
chr8	2590689	2590731	KHDRBS1_K562_rep01	0.901608	0.284934
chr8	2595291	2595317	KHDRBS1_K562_rep01	0.901608	0.284934
chr8	2610888	2610925	KHDRBS1_K562_rep01	0.901608	0.284934
chr8	2640089	2640118	KHDRBS1_K562_rep01	0.901608	0.284934
chr8	2618360	2618413	KHDRBS1_K562_rep01	1.07153	0.283921
chr8	2619792	2619862	KHDRBS1_K562_rep01	1.07153	0.283921
chr8	2598525	2598570	HNRNPL_K562_rep02	1.07714	0.283885
chr8	2616483	2616534	HNRNPL_K562_rep02	1.07714	0.283885
chr8	2592271	2592324	SAFB_K562_rep01	0.985115	0.282854
chr8	2611920	2611980	SAFB_K562_rep01	0.985115	0.282854
chr8	2621226	2621248	SAFB2_K562_rep02	1.1392	0.282621
chr8	2674980	2675015	SAFB2_K562_rep02	1.1392	0.282621
chr8	2613344	2613378	SAFB2_K562_rep01	0.968771	0.282316
chr8	2601235	2601298	KHDRBS1_K562_rep02	0.896936	0.278736
chr8	2615913	2615930	KHDRBS1_K562_rep02	0.896936	0.278736
chr8	2669230	2669290	CPSF6_K562_rep02	0.619704	0.278399
chr8	2610680	2610725	KHDRBS1_K562_rep02	1.04894	0.277357
chr8	2641098	2641163	KHDRBS1_K562_rep02	1.04894	0.277357
chr8	2593365	2593418	PPIL4_K562_rep01	0.97184	0.276754
chr8	2666164	2666176	SAFB2_K562_rep01	1.12077	0.275699
chr8	2667913	2667993	FUS_K562_rep01	0.997634	0.261072
chr8	2626269	2626339	NONO_K562_rep02	0.708109	0.247812
chr8	2623239	2623310	KHDRBS1_K562_rep01	0.776077	0.244631
chr8	2668021	2668051	SAFB2_K562_rep02	0.843744	0.244019
chr8	2588921	2588996	SAFB_K562_rep02	0.824896	0.239491
chr8	2601253	2601307	HLTF_K562_rep01	0.645487	0.220617
chr8	2607429	2607456	CPSF6_K562_rep01	1.57926	0.204118
chr8	2611149	2611183	CPSF6_K562_rep01	1.57926	0.204118
chr8	2662648	2662678	CPSF6_K562_rep01	1.57926	0.204118
chr8	2664456	2664488	CPSF6_K562_rep01	1.57926	0.204118
chr8	2672286	2672324	CPSF6_K562_rep01	1.57926	0.204118
chr8	2593597	2593633	TAF15_K562_rep02	1.57597	0.204115
chr8	2594463	2594489	TAF15_K562_rep02	1.57597	0.204115
chr8	2595862	2595893	TAF15_K562_rep02	1.57597	0.204115
chr8	2596390	2596425	TAF15_K562_rep02	1.57597	0.204115
chr8	2596466	2596500	TAF15_K562_rep02	1.57597	0.204115
chr8	2600153	2600187	TAF15_K562_rep02	1.57597	0.204115
chr8	2600769	2600802	TAF15_K562_rep02	1.57597	0.204115
chr8	2602465	2602482	TAF15_K562_rep02	1.57597	0.204115
chr8	2606291	2606309	TAF15_K562_rep02	1.57597	0.204115
chr8	2607201	2607235	TAF15_K562_rep02	1.57597	0.204115
chr8	2610701	2610737	TAF15_K562_rep02	1.57597	0.204115
chr8	2610872	2610900	TAF15_K562_rep02	1.57597	0.204115
chr8	2611392	2611422	TAF15_K562_rep02	1.57597	0.204115
chr8	2611941	2611974	TAF15_K562_rep02	1.57597	0.204115
chr8	2622196	2622214	TAF15_K562_rep02	1.57597	0.204115
chr8	2650908	2650928	TAF15_K562_rep02	1.57597	0.204115
chr8	2651117	2651152	TAF15_K562_rep02	1.57597	0.204115
chr8	2662823	2662839	TAF15_K562_rep02	1.57597	0.204115
chr8	2601358	2601388	BUD13_K562_rep02	1.57589	0.204115
chr8	2667941	2667983	BUD13_K562_rep02	1.57589	0.204115
chr8	2670263	2670295	BUD13_K562_rep02	1.57589	0.204115
chr8	2670604	2670640	BUD13_K562_rep02	1.57589	0.204115
chr8	2622799	2622823	HNRNPA1_K562_rep02	1.57146	0.204109
chr8	2588940	2588970	YWHAG_K562_rep02	1.56271	0.204089
chr8	2589659	2589681	YWHAG_K562_rep02	1.56271	0.204089
chr8	2646299	2646314	YWHAG_K562_rep02	1.56271	0.204089
chr8	2654801	2654827	YWHAG_K562_rep02	1.56271	0.204089
chr8	2664432	2664458	YWHAG_K562_rep02	1.56271	0.204089
chr8	2664687	2664694	YWHAG_K562_rep02	1.56271	0.204089
chr8	2665633	2665647	YWHAG_K562_rep02	1.56271	0.204089
chr8	2669597	2669610	YWHAG_K562_rep02	1.56271	0.204089
chr8	2670526	2670554	YWHAG_K562_rep02	1.56271	0.204089
chr8	2671309	2671340	YWHAG_K562_rep02	1.56271	0.204089
chr8	2671554	2671577	YWHAG_K562_rep02	1.56271	0.204089
chr8	2671986	2672009	YWHAG_K562_rep02	1.56271	0.204089
chr8	2675084	2675112	YWHAG_K562_rep02	1.56271	0.204089
chr8	2588120	2588149	MTPAP_K562_rep01	1.51985	0.203855
chr8	2627394	2627420	MTPAP_K562_rep01	1.51985	0.203855
chr8	2625880	2625911	RBFOX2_K562_rep02	1.51073	0.203775
chr8	2629880	2629904	RBFOX2_K562_rep02	1.51073	0.203775
chr8	2662167	2662193	RBFOX2_K562_rep02	1.51073	0.203775
chr8	2662758	2662791	RBFOX2_K562_rep02	1.51073	0.203775
chr8	2669282	2669318	RBFOX2_K562_rep02	1.51073	0.203775
chr8	2646120	2646150	SRSF1_K562_rep01	1.50954	0.203764
chr8	2670495	2670532	SRSF1_K562_rep01	1.50954	0.203764
chr8	2590249	2590277	NOLC1_K562_rep01	1.49439	0.203607
chr8	2597836	2597866	NOLC1_K562_rep01	1.49439	0.203607
chr8	2600997	2601018	NOLC1_K562_rep01	1.49439	0.203607
chr8	2645152	2645180	NOLC1_K562_rep01	1.49439	0.203607
chr8	2645838	2645867	NOLC1_K562_rep01	1.49439	0.203607
chr8	2666546	2666580	NOLC1_K562_rep01	1.49439	0.203607
chr8	2667919	2667949	NOLC1_K562_rep01	1.49439	0.203607
chr8	2670029	2670055	NOLC1_K562_rep01	1.49439	0.203607
chr8	2591552	2591582	AGGF1_K562_rep02	1.49235	0.203584
chr8	2594596	2594607	AGGF1_K562_rep02	1.49235	0.203584
chr8	2599826	2599855	AGGF1_K562_rep02	1.49235	0.203584
chr8	2601517	2601541	AGGF1_K562_rep02	1.49235	0.203584
chr8	2604428	2604450	AGGF1_K562_rep02	1.49235	0.203584
chr8	2612763	2612777	AGGF1_K562_rep02	1.49235	0.203584
chr8	2615811	2615843	AGGF1_K562_rep02	1.49235	0.203584
chr8	2634839	2634858	AGGF1_K562_rep02	1.49235	0.203584
chr8	2655766	2655785	AGGF1_K562_rep02	1.49235	0.203584
chr8	2662178	2662207	AGGF1_K562_rep02	1.49235	0.203584
chr8	2601558	2601591	TRA2A_K562_rep02	1.46556	0.20323
chr8	2595979	2595993	BUD13_K562_rep01	1.43154	0.202654
chr8	2602410	2602445	BUD13_K562_rep01	1.43154	0.202654
chr8	2606861	2606892	BUD13_K562_rep01	1.43154	0.202654
chr8	2645591	2645620	BUD13_K562_rep01	1.43154	0.202654
chr8	2665464	2665493	BUD13_K562_rep01	1.43154	0.202654
chr8	2671013	2671037	BUD13_K562_rep01	1.43154	0.202654
chr8	2671655	2671683	BUD13_K562_rep01	1.43154	0.202654
chr8	2610032	2610058	CSTF2T_K562_rep01	1.42755	0.202577
chr8	2625986	2626026	CSTF2T_K562_rep01	1.42755	0.202577
chr8	2670605	2670636	CSTF2T_K562_rep01	1.42755	0.202577
chr8	2670849	2670895	CSTF2T_K562_rep01	1.42755	0.202577
chr8	2626559	2626586	TARDBP_K562_rep01	1.34017	0.200416
chr8	2606930	2606961	APOBEC3C_K562_rep02	1.33398	0.200229
chr8	2601025	2601046	YWHAG_K562_rep01	1.33094	0.200135
chr8	2602197	2602228	YWHAG_K562_rep01	1.33094	0.200135
chr8	2607247	2607270	YWHAG_K562_rep01	1.33094	0.200135
chr8	2607670	2607692	YWHAG_K562_rep01	1.33094	0.200135
chr8	2608252	2608285	YWHAG_K562_rep01	1.33094	0.200135
chr8	2609350	2609380	YWHAG_K562_rep01	1.33094	0.200135
chr8	2609632	2609657	YWHAG_K562_rep01	1.33094	0.200135
chr8	2651531	2651557	YWHAG_K562_rep01	1.33094	0.200135
chr8	2651616	2651644	YWHAG_K562_rep01	1.33094	0.200135
chr8	2671830	2671857	YWHAG_K562_rep01	1.33094	0.200135
chr8	2671903	2671932	YWHAG_K562_rep01	1.33094	0.200135
chr8	2599741	2599751	ZC3H8_K562_rep02	1.32495	0.199948
chr8	2599751	2599783	ZC3H8_K562_rep02	1.32495	0.199948
chr8	2607408	2607432	NONO_K562_rep02	1.29307	0.198882
chr8	2633212	2633241	NONO_K562_rep02	1.29307	0.198882
chr8	2587934	2587970	ILF3_K562_rep02	1.29066	0.198796
chr8	2654361	2654395	ILF3_K562_rep02	1.29066	0.198796
chr8	2667258	2667296	MATR3_K562_rep02	1.21713	0.195887
chr8	2590211	2590239	TIA1_K562_rep01	1.20068	0.195158
chr8	2605529	2605565	TIA1_K562_rep01	1.20068	0.195158
chr8	2634096	2634125	TIA1_K562_rep01	1.20068	0.195158
chr8	2672285	2672308	TIA1_K562_rep01	1.20068	0.195158
chr8	2589628	2589656	HNRNPK_K562_rep02	1.06484	0.188109
chr8	2596505	2596529	HNRNPK_K562_rep02	1.06484	0.188109
chr8	2623387	2623414	HNRNPK_K562_rep02	1.06484	0.188109
chr8	2630746	2630779	HNRNPK_K562_rep02	1.06484	0.188109
chr8	2634930	2634966	HNRNPK_K562_rep02	1.06484	0.188109
chr8	2587918	2587946	ILF3_K562_rep01	1.03106	0.186094
chr8	2628588	2628617	ILF3_K562_rep01	1.03106	0.186094
chr8	2633791	2633812	ILF3_K562_rep01	1.03106	0.186094
chr8	2649565	2649604	ILF3_K562_rep01	1.03106	0.186094
chr8	2623916	2623963	TIA1_K562_rep02	1.40967	0.184155
chr8	2625564	2625599	TIA1_K562_rep02	1.40967	0.184155
chr8	2607562	2607603	NONO_K562_rep01	1.4039	0.184149
chr8	2631136	2631172	NONO_K562_rep01	1.4039	0.184149
chr8	2594846	2594897	RBM15_K562_rep02	1.38517	0.184098
chr8	2600716	2600746	RBM15_K562_rep02	1.38517	0.184098
chr8	2601061	2601083	RBM15_K562_rep02	1.38517	0.184098
chr8	2608007	2608038	RBM15_K562_rep02	1.38517	0.184098
chr8	2668533	2668574	RBM15_K562_rep02	1.38517	0.184098
chr8	2598208	2598254	ILF3_K562_rep01	1.4461	0.184093
chr8	2679251	2679290	ILF3_K562_rep01	1.4461	0.184093
chr8	2667685	2667708	HNRNPK_K562_rep02	1.47988	0.183878
chr8	2587902	2587950	TRA2A_K562_rep01	1.30982	0.18343
chr8	2626548	2626579	TARDBP_K562_rep02	1.30976	0.18343
chr8	2669742	2669782	GRWD1_K562_rep01	1.29373	0.183193
chr8	2668916	2668950	ZNF622_K562_rep02	1.00841	0.18243
chr8	2670118	2670145	ZNF622_K562_rep02	1.00841	0.18243
chr8	2594609	2594642	SRSF1_K562_rep02	1.22766	0.181874
chr8	2669251	2669298	SRSF1_K562_rep02	1.22766	0.181874
chr8	2606940	2606975	RBM15_K562_rep01	0.980159	0.181775
chr8	2669292	2669316	RBM15_K562_rep01	0.980159	0.181775
chr8	2597448	2597477	ZNF622_K562_rep01	0.958383	0.181201
chr8	2608262	2608293	ZNF622_K562_rep01	0.958383	0.181201
chr8	2651610	2651644	ZNF622_K562_rep01	0.958383	0.181201
chr8	2591638	2591676	NOLC1_K562_rep02	1.20122	0.181196
chr8	2597175	2597215	NOLC1_K562_rep02	1.20122	0.181196
chr8	2608226	2608268	NOLC1_K562_rep02	1.20122	0.181196
chr8	2651289	2651335	NOLC1_K562_rep02	1.20122	0.181196
chr8	2672062	2672098	NOLC1_K562_rep02	1.20122	0.181196
chr8	2597288	2597317	SLTM_K562_rep02	0.953111	0.181053
chr8	2607198	2607213	HNRNPL_K562_rep01	1.1917	0.180931
chr8	2612222	2612258	HNRNPL_K562_rep01	1.1917	0.180931
chr8	2634804	2634833	HNRNPL_K562_rep01	1.1917	0.180931
chr8	2667288	2667318	HNRNPL_K562_rep01	1.1917	0.180931
chr8	2596930	2596971	CSTF2T_K562_rep02	1.18871	0.180845
chr8	2609926	2609959	CSTF2T_K562_rep02	1.18871	0.180845
chr8	2631071	2631116	CSTF2T_K562_rep02	1.18871	0.180845
chr8	2671550	2671564	CSTF2T_K562_rep02	1.18871	0.180845
chr8	2612194	2612213	AKAP8L_K562_rep01	0.889158	0.178976
chr8	2592271	2592315	CPSF6_K562_rep02	0.882738	0.178739
chr8	2625816	2625826	CPSF6_K562_rep02	0.882738	0.178739
chr8	2625826	2625856	CPSF6_K562_rep02	0.882738	0.178739
chr8	2591910	2591946	XRN2_K562_rep01	0.870259	0.178265
chr8	2602620	2602662	XRN2_K562_rep01	0.870259	0.178265
chr8	2635011	2635051	XRN2_K562_rep01	0.870259	0.178265
chr8	2590188	2590222	MTPAP_K562_rep02	0.867791	0.178169
chr8	2590830	2590863	RBFOX2_K562_rep01	1.05511	0.175982
chr8	2591463	2591474	RBFOX2_K562_rep01	1.05511	0.175982
chr8	2605702	2605718	RBFOX2_K562_rep01	1.05511	0.175982
chr8	2606063	2606074	RBFOX2_K562_rep01	1.05511	0.175982
chr8	2622807	2622840	RBFOX2_K562_rep01	1.05511	0.175982
chr8	2624932	2624954	RBFOX2_K562_rep01	1.05511	0.175982
chr8	2642767	2642784	RBFOX2_K562_rep01	1.05511	0.175982
chr8	2671797	2671824	RBFOX2_K562_rep01	1.05511	0.175982
chr8	2591972	2592019	KHSRP_K562_rep01	1.04929	0.175726
chr8	2626495	2626532	KHSRP_K562_rep01	1.04929	0.175726
chr8	2631131	2631157	KHSRP_K562_rep01	1.04929	0.175726
chr8	2633889	2633909	KHSRP_K562_rep01	1.04929	0.175726
chr8	2645666	2645713	KHSRP_K562_rep01	1.04929	0.175726
chr8	2661983	2662020	KHSRP_K562_rep01	1.04929	0.175726
chr8	2674364	2674417	KHSRP_K562_rep01	1.04929	0.175726
chr8	2589423	2589427	PPIL4_K562_rep02	1.04023	0.17532
chr8	2595509	2595516	PPIL4_K562_rep02	1.04023	0.17532
chr8	2601819	2601841	PPIL4_K562_rep02	1.04023	0.17532
chr8	2609411	2609424	PPIL4_K562_rep02	1.04023	0.17532
chr8	2610356	2610381	PPIL4_K562_rep02	1.04023	0.17532
chr8	2621187	2621226	PPIL4_K562_rep02	1.04023	0.17532
chr8	2644666	2644703	PPIL4_K562_rep02	1.04023	0.17532
chr8	2662186	2662210	PPIL4_K562_rep02	1.04023	0.17532
chr8	2665461	2665501	PPIL4_K562_rep02	1.04023	0.17532
chr8	2666974	2667014	PPIL4_K562_rep02	1.04023	0.17532
chr8	2662170	2662201	YBX3_K562_rep01	1.01184	0.173995
chr8	2588926	2588973	KHSRP_K562_rep02	1.32092	0.173419
chr8	2630425	2630467	KHSRP_K562_rep02	1.32092	0.173419
chr8	2656581	2656599	KHSRP_K562_rep02	1.32092	0.173419
chr8	2590193	2590231	SND1_K562_rep01	0.762112	0.173389
chr8	2607381	2607412	SND1_K562_rep01	0.762112	0.173389
chr8	2665882	2665926	SND1_K562_rep01	0.762112	0.173389
chr8	2589186	2589204	PPIL4_K562_rep02	1.36216	0.173308
chr8	2590120	2590159	PPIL4_K562_rep02	1.36216	0.173308
chr8	2591626	2591650	PPIL4_K562_rep02	1.36216	0.173308
chr8	2593677	2593697	PPIL4_K562_rep02	1.36216	0.173308
chr8	2595383	2595417	PPIL4_K562_rep02	1.36216	0.173308
chr8	2597225	2597246	PPIL4_K562_rep02	1.36216	0.173308
chr8	2614739	2614793	PPIL4_K562_rep02	1.36216	0.173308
chr8	2645145	2645172	PPIL4_K562_rep02	1.36216	0.173308
chr8	2645889	2645932	PPIL4_K562_rep02	1.36216	0.173308
chr8	2626174	2626205	KHSRP_K562_rep01	1.37122	0.173252
chr8	2656603	2656624	KHSRP_K562_rep01	1.37122	0.173252
chr8	2607654	2607672	RBFOX2_K562_rep01	1.37704	0.173211
chr8	2608188	2608220	RBFOX2_K562_rep01	1.37704	0.173211
chr8	2608851	2608874	RBFOX2_K562_rep01	1.37704	0.173211
chr8	2611476	2611512	RBFOX2_K562_rep01	1.37704	0.173211
chr8	2619246	2619282	RBFOX2_K562_rep01	1.37704	0.173211
chr8	2620034	2620058	RBFOX2_K562_rep01	1.37704	0.173211
chr8	2621228	2621257	RBFOX2_K562_rep01	1.37704	0.173211
chr8	2653265	2653303	RBFOX2_K562_rep01	1.37704	0.173211
chr8	2663172	2663208	RBFOX2_K562_rep01	1.37704	0.173211
chr8	2669960	2669996	RBFOX2_K562_rep01	1.37704	0.173211
chr8	2670173	2670215	RBFOX2_K562_rep01	1.37704	0.173211
chr8	2598969	2598995	HNRNPL_K562_rep02	1.22914	0.172836
chr8	2616336	2616366	HNRNPL_K562_rep02	1.22914	0.172836
chr8	2625187	2625221	HNRNPL_K562_rep02	1.22914	0.172836
chr8	2635328	2635359	HNRNPL_K562_rep02	1.22914	0.172836
chr8	2637597	2637653	HNRNPL_K562_rep02	1.22914	0.172836
chr8	2645947	2645988	HNRNPL_K562_rep02	1.22914	0.172836
chr8	2667009	2667054	HNRNPL_K562_rep02	1.22914	0.172836
chr8	2588794	2588813	KHDRBS1_K562_rep01	1.22354	0.172764
chr8	2609054	2609083	KHDRBS1_K562_rep01	1.22354	0.172764
chr8	2609120	2609148	KHDRBS1_K562_rep01	1.22354	0.172764
chr8	2622348	2622380	KHDRBS1_K562_rep01	1.22354	0.172764
chr8	2625216	2625235	KHDRBS1_K562_rep01	1.22354	0.172764
chr8	2641672	2641707	KHDRBS1_K562_rep01	1.22354	0.172764
chr8	2644682	2644714	KHDRBS1_K562_rep01	1.22354	0.172764
chr8	2647381	2647411	KHDRBS1_K562_rep01	1.22354	0.172764
chr8	2654627	2654659	KHDRBS1_K562_rep01	1.22354	0.172764
chr8	2678924	2678955	KHDRBS1_K562_rep01	1.22354	0.172764
chr8	2590563	2590598	NSUN2_K562_rep01	0.728331	0.171598
chr8	2593779	2593805	SAFB_K562_rep02	1.14682	0.171369
chr8	2595985	2596011	SAFB_K562_rep02	1.14682	0.171369
chr8	2600703	2600713	SAFB_K562_rep02	1.14682	0.171369
chr8	2605888	2605911	SAFB_K562_rep02	1.14682	0.171369
chr8	2606933	2606956	SAFB_K562_rep02	1.14682	0.171369
chr8	2613711	2613746	SAFB_K562_rep02	1.14682	0.171369
chr8	2623808	2623834	SAFB_K562_rep02	1.14682	0.171369
chr8	2624963	2624998	SAFB_K562_rep02	1.14682	0.171369
chr8	2634987	2635013	SAFB_K562_rep02	1.14682	0.171369
chr8	2641672	2641716	SAFB_K562_rep02	1.14682	0.171369
chr8	2650929	2650967	SAFB_K562_rep02	1.14682	0.171369
chr8	2663881	2663917	SAFB_K562_rep02	1.14682	0.171369
chr8	2664173	2664205	SAFB_K562_rep02	1.14682	0.171369
chr8	2668431	2668474	SAFB_K562_rep02	1.14682	0.171369
chr8	2589671	2589691	SAFB_K562_rep01	1.13712	0.171139
chr8	2598680	2598721	SAFB_K562_rep01	1.13712	0.171139
chr8	2599151	2599208	SAFB_K562_rep01	1.13712	0.171139
chr8	2608851	2608881	SAFB_K562_rep01	1.13712	0.171139
chr8	2608929	2608952	SAFB_K562_rep01	1.13712	0.171139
chr8	2617366	2617409	SAFB_K562_rep01	1.13712	0.171139
chr8	2621210	2621244	SAFB_K562_rep01	1.13712	0.171139
chr8	2621733	2621769	SAFB_K562_rep01	1.13712	0.171139
chr8	2667790	2667849	SAFB_K562_rep01	1.13712	0.171139
chr8	2662178	2662207	PABPC4_K562_rep01	0.817421	0.17113
chr8	2631394	2631430	GTF2F1_K562_rep01	0.71049	0.170603
chr8	2626845	2626897	HNRNPA1_K562_rep01	1.06322	0.169013
chr8	2591026	2591057	KHDRBS1_K562_rep02	1.04894	0.168528
chr8	2593977	2594004	KHDRBS1_K562_rep02	1.04894	0.168528
chr8	2602909	2602917	KHDRBS1_K562_rep02	1.04894	0.168528
chr8	2614752	2614785	KHDRBS1_K562_rep02	1.04894	0.168528
chr8	2624913	2624943	KHDRBS1_K562_rep02	1.04894	0.168528
chr8	2625816	2625845	KHDRBS1_K562_rep02	1.04894	0.168528
chr8	2635267	2635299	KHDRBS1_K562_rep02	1.04894	0.168528
chr8	2638886	2638915	KHDRBS1_K562_rep02	1.04894	0.168528
chr8	2640143	2640159	KHDRBS1_K562_rep02	1.04894	0.168528
chr8	2670675	2670706	KHDRBS1_K562_rep02	1.04894	0.168528
chr8	2611938	2611969	SLTM_K562_rep01	0.719807	0.168052
chr8	2592587	2592597	PPIL4_K562_rep01	1.23487	0.166635
chr8	2593981	2594001	PPIL4_K562_rep01	1.23487	0.166635
chr8	2598225	2598232	PPIL4_K562_rep01	1.23487	0.166635
chr8	2599866	2599894	PPIL4_K562_rep01	1.23487	0.166635
chr8	2599928	2599952	PPIL4_K562_rep01	1.23487	0.166635
chr8	2601000	2601014	PPIL4_K562_rep01	1.23487	0.166635
chr8	2603969	2604002	PPIL4_K562_rep01	1.23487	0.166635
chr8	2609069	2609085	PPIL4_K562_rep01	1.23487	0.166635
chr8	2613041	2613076	PPIL4_K562_rep01	1.23487	0.166635
chr8	2615386	2615413	PPIL4_K562_rep01	1.23487	0.166635
chr8	2622032	2622072	PPIL4_K562_rep01	1.23487	0.166635
chr8	2641675	2641713	PPIL4_K562_rep01	1.23487	0.166635
chr8	2665461	2665492	PPIL4_K562_rep01	1.23487	0.166635
chr8	2669581	2669619	PPIL4_K562_rep01	1.23487	0.166635
chr8	2671980	2672016	PPIL4_K562_rep01	1.23487	0.166635
chr8	2611297	2611325	KHDRBS1_K562_rep02	1.31197	0.166522
chr8	2615053	2615074	KHDRBS1_K562_rep02	1.31197	0.166522
chr8	2615813	2615830	KHDRBS1_K562_rep02	1.31197	0.166522
chr8	2617358	2617393	KHDRBS1_K562_rep02	1.31197	0.166522
chr8	2639155	2639191	KHDRBS1_K562_rep02	1.31197	0.166522
chr8	2653606	2653642	KHDRBS1_K562_rep02	1.31197	0.166522
chr8	2592090	2592157	HNRNPA1_K562_rep01	1.32625	0.16641
chr8	2594372	2594405	ZC3H11A_K562_rep02	0.664106	0.165742
chr8	2600555	2600587	ZC3H11A_K562_rep02	0.664106	0.165742
chr8	2604005	2604014	ZC3H11A_K562_rep02	0.664106	0.165742
chr8	2604014	2604044	ZC3H11A_K562_rep02	0.664106	0.165742
chr8	2653271	2653297	ZC3H11A_K562_rep02	0.664106	0.165742
chr8	2613271	2613286	SAFB2_K562_rep01	1.38381	0.165665
chr8	2621515	2621523	SAFB2_K562_rep01	1.38381	0.165665
chr8	2625876	2625889	SAFB2_K562_rep01	1.38381	0.165665
chr8	2641671	2641683	SAFB2_K562_rep01	1.38381	0.165665
chr8	2647520	2647523	SAFB2_K562_rep01	1.38381	0.165665
chr8	2679803	2679819	SAFB2_K562_rep01	1.38381	0.165665
chr8	2594865	2594908	SAFB_K562_rep01	1.40015	0.165368
chr8	2619805	2619837	SAFB_K562_rep01	1.40015	0.165368
chr8	2635052	2635125	SAFB_K562_rep01	1.40015	0.165368
chr8	2595177	2595202	SAFB_K562_rep02	1.40986	0.165174
chr8	2599150	2599193	SAFB_K562_rep02	1.40986	0.165174
chr8	2600597	2600628	SAFB_K562_rep02	1.40986	0.165174
chr8	2613044	2613088	SAFB_K562_rep02	1.40986	0.165174
chr8	2613493	2613533	SAFB_K562_rep02	1.40986	0.165174
chr8	2619452	2619495	SAFB_K562_rep02	1.40986	0.165174
chr8	2635101	2635145	SAFB_K562_rep02	1.40986	0.165174
chr8	2642333	2642383	SAFB_K562_rep02	1.40986	0.165174
chr8	2663157	2663197	SAFB_K562_rep02	1.40986	0.165174
chr8	2669243	2669276	SAFB_K562_rep02	1.40986	0.165174
chr8	2662108	2662201	SRSF7_K562_rep02	1.42	0.164957
chr8	2590304	2590333	UCHL5_K562_rep02	0.605562	0.164119
chr8	2590410	2590438	UCHL5_K562_rep02	0.605562	0.164119
chr8	2600853	2600859	UCHL5_K562_rep02	0.605562	0.164119
chr8	2609153	2609167	UCHL5_K562_rep02	0.605562	0.164119
chr8	2610825	2610841	UCHL5_K562_rep02	0.605562	0.164119
chr8	2648511	2648543	UCHL5_K562_rep02	0.605562	0.164119
chr8	2663655	2663675	UCHL5_K562_rep02	0.605562	0.164119
chr8	2668099	2668117	UCHL5_K562_rep02	0.605562	0.164119
chr8	2591467	2591509	FUS_K562_rep02	1.05044	0.16364
chr8	2594521	2594574	FUS_K562_rep02	1.05044	0.16364
chr8	2602195	2602240	FUS_K562_rep02	1.05044	0.16364
chr8	2612541	2612582	FUS_K562_rep02	1.05044	0.16364
chr8	2627834	2627897	FUS_K562_rep02	1.05044	0.16364
chr8	2652896	2652948	FUS_K562_rep02	1.05044	0.16364
chr8	2592280	2592314	TAF15_K562_rep01	0.591045	0.163142
chr8	2597280	2597315	TAF15_K562_rep01	0.591045	0.163142
chr8	2620034	2620066	TAF15_K562_rep01	0.591045	0.163142
chr8	2644571	2644596	TAF15_K562_rep01	0.591045	0.163142
chr8	2621664	2621683	LSM11_K562_rep02	0.586805	0.162853
chr8	2667355	2667403	CPSF6_K562_rep01	0.994294	0.162725
chr8	2590589	2590638	TAF15_K562_rep02	0.991008	0.162722
chr8	2602195	2602243	TAF15_K562_rep02	0.991008	0.162722
chr8	2597008	2597045	NOLC1_K562_rep01	0.909428	0.162145
chr8	2598673	2598746	FUS_K562_rep02	1.27283	0.161891
chr8	2621493	2621529	FUS_K562_rep02	1.27283	0.161891
chr8	2652757	2652795	BUD13_K562_rep01	0.84658	0.161064
chr8	2666015	2666057	BUD13_K562_rep01	0.84658	0.161064
chr8	2668618	2668668	BUD13_K562_rep01	0.84658	0.161064
chr8	2622803	2622862	HNRNPU_K562_rep01	1.06182	0.160293
chr8	2601017	2601051	HNRNPC_K562_rep01	1.04316	0.159864
chr8	2604423	2604468	HNRNPC_K562_rep01	1.04316	0.159864
chr8	2608244	2608273	DROSHA_K562_rep02	0.646294	0.159158
chr8	2605140	2605182	FUS_K562_rep01	1.19028	0.158704
chr8	2607892	2607948	FUS_K562_rep01	1.19028	0.158704
chr8	2645672	2645727	FUS_K562_rep01	1.19028	0.158704
chr8	2592270	2592324	HNRNPC_K562_rep01	1.2358	0.15857
chr8	2594567	2594611	HNRNPC_K562_rep01	1.2358	0.15857
chr8	2590504	2590533	TARDBP_K562_rep01	0.755208	0.158536
chr8	2591888	2591960	HNRNPU_K562_rep01	1.25446	0.158429
chr8	2597167	2597186	UCHL5_K562_rep01	0.513674	0.15765
chr8	2607075	2607114	UCHL5_K562_rep01	0.513674	0.15765
chr8	2629830	2629866	NONO_K562_rep02	0.708109	0.156809
chr8	2587818	2587948	HLTF_K562_rep02	1.01077	0.154361
chr8	2589906	2589996	HLTF_K562_rep01	1.23045	0.153666
chr8	2594461	2594495	HLTF_K562_rep01	1.23045	0.153666
chr8	2595391	2595428	HLTF_K562_rep01	1.23045	0.153666
chr8	2597272	2597332	HLTF_K562_rep01	1.23045	0.153666
chr8	2602909	2602947	HLTF_K562_rep01	1.23045	0.153666
chr8	2611103	2611191	HLTF_K562_rep01	1.23045	0.153666
chr8	2669168	2669237	HLTF_K562_rep01	1.23045	0.153666
chr8	2597236	2597305	FUS_K562_rep01	1.3602	0.153482
chr8	2601020	2601053	FUS_K562_rep01	1.3602	0.153482
chr8	2601847	2601894	FUS_K562_rep01	1.3602	0.153482
chr8	2671989	2672013	SLTM_K562_rep02	0.783186	0.150881
chr8	2602194	2602233	HLTF_K562_rep02	1.30027	0.150514
chr8	2622511	2622556	XRN2_K562_rep01	0.700334	0.149794
chr8	2608959	2608990	XRCC6_K562_rep01	0.400278	0.147951
chr8	2619410	2619455	HNRNPL_K562_rep01	0.776661	0.143265
chr8	2671639	2671677	CSTF2T_K562_rep02	0.77367	0.143232
chr8	2588918	2588964	RBFOX2_K562_rep01	0.640076	0.140423
chr8	2591326	2591347	PPIL4_K562_rep02	0.62519	0.139955
chr8	2597484	2597506	PPIL4_K562_rep02	0.62519	0.139955
chr8	2599558	2599598	PPIL4_K562_rep02	0.62519	0.139955
chr8	2601112	2601138	UCHL5_K562_rep02	0.435637	0.13987
chr8	2665118	2665162	UCHL5_K562_rep02	0.435637	0.13987
chr8	2669910	2669923	UCHL5_K562_rep02	0.435637	0.13987
chr8	2666191	2666233	TAF15_K562_rep01	0.42112	0.13907
chr8	2671766	2671815	TAF15_K562_rep02	0.727974	0.138721
chr8	2647145	2647158	SAFB2_K562_rep02	0.77663	0.138469
chr8	2593183	2593231	RBFOX2_K562_rep01	0.862468	0.138304
chr8	2608409	2608447	RBFOX2_K562_rep01	0.862468	0.138304
chr8	2616542	2616587	RBFOX2_K562_rep01	0.862468	0.138304
chr8	2612631	2612666	KHDRBS1_K562_rep01	0.708963	0.137792
chr8	2617562	2617602	KHDRBS1_K562_rep01	0.708963	0.137792
chr8	2596476	2596530	BUD13_K562_rep01	0.583546	0.136894
chr8	2602195	2602232	AKAP8L_K562_rep02	0.527277	0.136753
chr8	2594742	2594771	SAFB_K562_rep02	0.632251	0.136196
chr8	2600149	2600196	SAFB_K562_rep02	0.632251	0.136196
chr8	2611938	2611980	SAFB_K562_rep02	0.632251	0.136196
chr8	2613357	2613387	SAFB_K562_rep02	0.632251	0.136196
chr8	2589415	2589454	SAFB_K562_rep01	0.622545	0.135933
chr8	2615351	2615440	SAFB_K562_rep01	0.622545	0.135933
chr8	2618681	2618737	SAFB_K562_rep01	0.622545	0.135933
chr8	2616553	2616568	SAFB2_K562_rep01	0.606201	0.135462
chr8	2617719	2617733	SAFB2_K562_rep01	0.606201	0.135462
chr8	2603998	2604040	RBM15_K562_rep01	0.395196	0.134865
chr8	2654919	2654938	SAFB2_K562_rep01	0.798846	0.134758
chr8	2610102	2610162	SAFB_K562_rep01	0.81519	0.134681
chr8	2597158	2597202	SAFB_K562_rep02	0.824896	0.134615
chr8	2592642	2592680	KHDRBS1_K562_rep02	0.727011	0.134591
chr8	2607453	2607518	ILF3_K562_rep02	0.442663	0.132127
chr8	2610583	2610624	PPIL4_K562_rep01	0.819837	0.131582
chr8	2669164	2669218	GRWD1_K562_rep02	0.824019	0.131537
chr8	2667877	2667940	FUS_K562_rep02	0.635403	0.130792
chr8	2621781	2621832	FUS_K562_rep01	0.64971	0.127387
chr8	2601507	2601534	HLTF_K562_rep01	0.608961	0.124331
chr8	2603238	2603288	HLTF_K562_rep01	0.815412	0.121523
chr8	2590179	2590228	HNRNPL_K562_rep01	0.606736	0.121391
chr8	2663395	2663429	KHSRP_K562_rep02	0.583952	0.118299
chr8	2610041	2610103	PPIL4_K562_rep02	0.62519	0.118158
chr8	2590183	2590231	HNRNPL_K562_rep02	0.492179	0.117558
chr8	2613036	2613073	KHDRBS1_K562_rep01	0.48657	0.117466
chr8	2612865	2612945	SAFB_K562_rep02	0.561862	0.115845
chr8	2608243	2608291	KHDRBS1_K562_rep01	0.638573	0.115394
chr8	2618424	2618493	KHDRBS1_K562_rep02	0.463977	0.114922
chr8	2615115	2615135	SAFB2_K562_rep02	0.428707	0.104658
chr8	2594732	2594809	HLTF_K562_rep01	0.367953	0.0942093
chr8	2595048	2595086	KHDRBS1_K562_rep01	0.164642	0.0161663
chr8	2588920	2588973	TAF15_K562_rep02	0.254043	0.00359779
chr8	2587871	2587968	HNRNPC_K562_rep01	0.557729	0
chr8	2587950	2587975	HNRNPA1_K562_rep01	-0.67375	0
chr8	2587951	2587979	HNRNPU_K562_rep02	-0.841451	0
chr8	2588106	2588113	RBFOX2_K562_rep01	0.640076	0
chr8	2588111	2588141	KHDRBS1_K562_rep02	-0.951061	0
chr8	2588113	2588149	BUD13_K562_rep01	0.431543	0
chr8	2588121	2588177	SAFB_K562_rep01	0.230227	0
chr8	2588125	2588147	PPIL4_K562_rep01	-0.350088	0
chr8	2588173	2588206	AQR_K562_rep01	0.280172	0
chr8	2588723	2588771	ILF3_K562_rep01	0.446102	0
chr8	2588914	2588962	ILF3_K562_rep02	-0.294303	0
chr8	2588926	2588964	HNRNPL_K562_rep02	-0.770856	0
chr8	2588927	2588968	HNRNPL_K562_rep01	-0.486373	0
chr8	2588931	2588962	ILF3_K562_rep01	-0.968935	0
chr8	2588933	2588963	NOLC1_K562_rep02	-0.213818	0
chr8	2589291	2589319	HNRNPL_K562_rep01	0.776661	0
chr8	2589332	2589371	RBM15_K562_rep02	0.385174	0
chr8	2589345	2589378	HLTF_K562_rep02	-2.15916	0
chr8	2589404	2589432	UCHL5_K562_rep01	0.0986365	0
chr8	2589408	2589451	FUS_K562_rep01	0.775241	0
chr8	2589412	2589443	RBM15_K562_rep02	-0.0298636	0
chr8	2589413	2589450	HNRNPU_K562_rep02	-1.42641	0
chr8	2589418	2589425	KHDRBS1_K562_rep01	0.223536	0
chr8	2589449	2589492	HLTF_K562_rep02	-0.159157	0
chr8	2589469	2589509	RBM15_K562_rep02	0.12214	0
chr8	2589571	2589594	CSTF2T_K562_rep02	0.77367	0
chr8	2589769	2589798	HNRNPL_K562_rep01	0.776661	0
chr8	2589813	2589841	HNRNPA1_K562_rep01	0.741288	0
chr8	2589866	2589890	AGGF1_K562_rep02	0.492354	0
chr8	2590030	2590101	HLTF_K562_rep02	0.425806	0
chr8	2590042	2590072	HLTF_K562_rep01	-0.0914791	0
chr8	2590052	2590078	KHDRBS1_K562_rep02	0.727011	0
chr8	2590061	2590072	PPIL4_K562_rep01	0.97184	0
chr8	2590107	2590160	FUS_K562_rep02	0.272833	0
chr8	2590128	2590146	HNRNPL_K562_rep02	0.907216	0
chr8	2590180	2590217	NOLC1_K562_rep02	-0.213818	0
chr8	2590184	2590239	HNRNPU_K562_rep02	-1.10449	0
chr8	2590190	2590206	KHDRBS1_K562_rep01	-0.0983923	0
chr8	2590199	2590236	KHDRBS1_K562_rep02	0.0489394	0
chr8	2590257	2590279	NONO_K562_rep02	0.293072	0
chr8	2590284	2590319	HNRNPC_K562_rep01	0.235801	0
chr8	2590326	2590374	HNRNPU_K562_rep01	-1.74554	0
chr8	2590354	2590378	TAF15_K562_rep02	0.575971	0
chr8	2590357	2590398	HNRNPA1_K562_rep01	-0.258712	0
chr8	2590493	2590528	KHSRP_K562_rep02	0.998989	0
chr8	2590527	2590573	KHDRBS1_K562_rep01	-0.51343	0
chr8	2590531	2590555	FUS_K562_rep02	0.465478	0
chr8	2590540	2590617	HNRNPU_K562_rep01	0.839426	0
chr8	2590548	2590591	HNRNPU_K562_rep02	0.158549	0
chr8	2590580	2590607	KHDRBS1_K562_rep02	0.534366	0
chr8	2590698	2590718	PPIL4_K562_rep01	0.97184	0
chr8	2591027	2591063	RBFOX2_K562_rep01	0.377041	0
chr8	2591027	2591060	SAFB_K562_rep01	0.81519	0
chr8	2591035	2591043	PPIL4_K562_rep01	0.649912	0
chr8	2591035	2591070	KHSRP_K562_rep01	0.63425	0
chr8	2591099	2591154	HNRNPC_K562_rep01	0.557729	0
chr8	2591225	2591288	HNRNPU_K562_rep02	-1.42641	0
chr8	2591323	2591347	PPIL4_K562_rep01	0.457267	0
chr8	2591470	2591494	SAFB2_K562_rep01	-0.201154	0
chr8	2591524	2591538	RBFOX2_K562_rep01	-0.207921	0
chr8	2591628	2591658	HNRNPL_K562_rep01	-0.223339	0
chr8	2591851	2591889	UCHL5_K562_rep01	-0.223292	0
chr8	2591851	2591880	HNRNPL_K562_rep02	-1.09278	0
chr8	2591853	2591888	NOLC1_K562_rep02	0.201219	0
chr8	2591857	2591890	SAFB_K562_rep01	0.400152	0
chr8	2591879	2591912	HNRNPU_K562_rep02	0.380941	0
chr8	2591979	2591996	HNRNPL_K562_rep02	0.492179	0
chr8	2592041	2592134	HNRNPC_K562_rep02	0.896843	0
chr8	2592153	2592187	SRSF7_K562_rep02	0.420004	0
chr8	2592264	2592316	HNRNPC_K562_rep02	0.896843	0
chr8	2592270	2592306	FXR1_K562_rep01	-0.350652	0
chr8	2592270	2592304	NOLC1_K562_rep02	-0.213818	0
chr8	2592271	2592314	HNRNPU_K562_rep02	-1.20402	0
chr8	2592272	2592322	HNRNPU_K562_rep01	-1.3305	0
chr8	2592272	2592282	SRSF7_K562_rep01	0.935981	0
chr8	2592275	2592308	KHDRBS1_K562_rep02	-1.27299	0
chr8	2592276	2592310	TAF15_K562_rep02	0.575971	0
chr8	2592279	2592313	BUD13_K562_rep01	-0.568457	0
chr8	2592282	2592313	SRSF7_K562_rep01	0.935981	0
chr8	2592584	2592594	KHDRBS1_K562_rep02	0.727011	0
chr8	2592623	2592652	NONO_K562_rep01	-0.0111413	0
chr8	2592886	2592928	HNRNPU_K562_rep02	-0.426414	0
chr8	2593037	2593069	KHDRBS1_K562_rep02	0.534366	0
chr8	2593041	2593091	SAFB_K562_rep01	0.81519	0
chr8	2593080	2593099	RBFOX2_K562_rep01	-0.529849	0
chr8	2593160	2593211	HNRNPU_K562_rep02	-0.426414	0
chr8	2593181	2593219	SND1_K562_rep01	-0.559817	0
chr8	2593188	2593209	SAFB_K562_rep01	0.400152	0
chr8	2593196	2593236	HNRNPC_K562_rep01	0.235801	0
chr8	2593221	2593255	HNRNPA1_K562_rep01	0.32625	0
chr8	2593346	2593381	HLTF_K562_rep02	-0.574194	0
chr8	2593371	2593415	RBFOX2_K562_rep01	0.0551131	0
chr8	2593373	2593429	HLTF_K562_rep01	0.230449	0
chr8	2593442	2593475	KHSRP_K562_rep02	0.583952	0
chr8	2593557	2593574	RBFOX2_K562_rep01	0.377041	0
chr8	2593557	2593576	HNRNPL_K562_rep02	0.492179	0
chr8	2593563	2593594	HLTF_K562_rep02	-0.574194	0
chr8	2593677	2593707	HNRNPU_K562_rep02	-0.841451	0
chr8	2594041	2594053	SAFB_K562_rep01	0.400152	0
chr8	2594043	2594079	NOLC1_K562_rep02	0.786182	0
chr8	2594047	2594081	KHDRBS1_K562_rep02	0.534366	0
chr8	2594174	2594213	HLTF_K562_rep01	0.908521	0
chr8	2594190	2594221	HLTF_K562_rep02	0.162771	0
chr8	2594256	2594280	BUD13_K562_rep01	0.431543	0
chr8	2594270	2594286	RBM15_K562_rep02	0.970136	0
chr8	2594274	2594309	FUS_K562_rep02	0.465478	0
chr8	2594376	2594412	FUS_K562_rep01	0.512207	0
chr8	2594463	2594493	AGGF1_K562_rep02	0.492354	0
chr8	2594546	2594580	HLTF_K562_rep01	0.908521	0
chr8	2594583	2594612	GRWD1_K562_rep01	0.878688	0
chr8	2594727	2594756	HNRNPC_K562_rep01	0.820764	0
chr8	2594747	2594779	HLTF_K562_rep02	-1.15916	0
chr8	2594853	2594860	HLTF_K562_rep02	-0.159157	0
chr8	2595005	2595016	HLTF_K562_rep01	0.493483	0
chr8	2595049	2595089	HLTF_K562_rep01	0.367953	0
chr8	2595180	2595239	FUS_K562_rep02	0.272833	0
chr8	2595206	2595218	PPIL4_K562_rep02	0.62519	0
chr8	2595288	2595314	NOLC1_K562_rep02	0.786182	0
chr8	2595535	2595551	SAFB_K562_rep01	0.81519	0
chr8	2595622	2595715	HLTF_K562_rep02	-0.159157	0
chr8	2595629	2595685	HLTF_K562_rep01	0.367953	0
chr8	2595643	2595681	SRSF1_K562_rep02	-0.18738	0
chr8	2595726	2595768	HLTF_K562_rep01	0.0784459	0
chr8	2595865	2595894	HLTF_K562_rep01	0.230449	0
chr8	2596145	2596177	HNRNPU_K562_rep02	-0.426414	0
chr8	2596263	2596309	HNRNPL_K562_rep01	0.513627	0
chr8	2596303	2596326	SAFB_K562_rep01	0.81519	0
chr8	2596306	2596343	SLTM_K562_rep02	-0.368817	0
chr8	2596463	2596505	HNRNPC_K562_rep01	0.235801	0
chr8	2596467	2596501	FUS_K562_rep01	0.512207	0
chr8	2596469	2596504	SAFB_K562_rep01	0.81519	0
chr8	2596470	2596503	KHDRBS1_K562_rep02	0.311974	0
chr8	2597023	2597057	FUS_K562_rep01	0.190279	0
chr8	2597134	2597164	AGGF1_K562_rep02	0.322429	0
chr8	2597163	2597224	HLTF_K562_rep02	-1.57419	0
chr8	2597177	2597197	SLTM_K562_rep02	-0.0468889	0
chr8	2597177	2597272	HLTF_K562_rep01	-0.391039	0
chr8	2597185	2597211	HNRNPU_K562_rep01	-1.16057	0
chr8	2597207	2597241	RBM15_K562_rep02	0.970136	0
chr8	2597286	2597321	RBM15_K562_rep02	0.970136	0
chr8	2597291	2597318	KHDRBS1_K562_rep02	0.727011	0
chr8	2597301	2597337	HLTF_K562_rep02	-0.574194	0
chr8	2597386	2597393	KHDRBS1_K562_rep02	-1.68803	0
chr8	2597402	2597440	KHDRBS1_K562_rep01	-1.09839	0
chr8	2597420	2597472	HNRNPL_K562_rep02	0.322254	0
chr8	2597439	2597461	BUD13_K562_rep02	-1.23147	0
chr8	2597447	2597470	HNRNPL_K562_rep01	-0.808301	0
chr8	2597889	2597917	HNRNPL_K562_rep01	0.776661	0
chr8	2598027	2598075	HNRNPU_K562_rep02	-0.104485	0
chr8	2598143	2598156	HNRNPL_K562_rep01	0.776661	0
chr8	2598431	2598439	HNRNPL_K562_rep02	0.492179	0
chr8	2598475	2598515	UCHL5_K562_rep02	0.0205992	0
chr8	2598477	2598505	TAF15_K562_rep02	0.575971	0
chr8	2598515	2598527	RBFOX2_K562_rep01	0.640076	0
chr8	2598523	2598538	KHDRBS1_K562_rep01	-0.0983923	0
chr8	2598553	2598597	HNRNPC_K562_rep01	0.235801	0
chr8	2598562	2598588	TAF15_K562_rep01	0.00608265	0
chr8	2598679	2598692	PPIL4_K562_rep01	0.97184	0
chr8	2598685	2598722	KHSRP_K562_rep02	0.583952	0
chr8	2598805	2598836	HNRNPU_K562_rep02	-1.10449	0
chr8	2599035	2599079	HNRNPU_K562_rep02	-1.42641	0
chr8	2599047	2599083	HNRNPU_K562_rep01	-1.16057	0
chr8	2599151	2599197	PPIL4_K562_rep02	-0.152418	0
chr8	2599228	2599234	KHDRBS1_K562_rep01	0.901608	0
chr8	2599555	2599614	HNRNPC_K562_rep02	0.0343465	0
chr8	2599571	2599591	KHDRBS1_K562_rep02	-0.272989	0
chr8	2599590	2599624	HNRNPU_K562_rep01	-1.16057	0
chr8	2599641	2599652	PPIL4_K562_rep01	0.97184	0
chr8	2599845	2599854	HLTF_K562_rep01	-0.506517	0
chr8	2600063	2600093	HNRNPU_K562_rep02	-0.841451	0
chr8	2600181	2600210	KHDRBS1_K562_rep02	0.0489394	0
chr8	2600277	2600298	FUS_K562_rep01	0.512207	0
chr8	2600370	2600414	HNRNPC_K562_rep01	0.820764	0
chr8	2600420	2600445	KHDRBS1_K562_rep02	0.727011	0
chr8	2600473	2600496	HNRNPC_K562_rep01	0.235801	0
chr8	2600548	2600620	FUS_K562_rep02	0.272833	0
chr8	2600632	2600661	HLTF_K562_rep02	-0.574194	0
chr8	2600648	2600660	KHDRBS1_K562_rep01	-0.0983923	0
chr8	2600890	2600919	GRWD1_K562_rep02	0.239057	0
chr8	2601019	2601050	TAF15_K562_rep02	0.575971	0
chr8	2601064	2601087	HNRNPU_K562_rep02	-2.42641	0
chr8	2601164	2601188	KHDRBS1_K562_rep01	0.901608	0
chr8	2601246	2601275	HLTF_K562_rep02	-0.837229	0
chr8	2601390	2601425	HLTF_K562_rep02	0.425806	0
chr8	2601428	2601455	SAFB_K562_rep02	0.824896	0
chr8	2601509	2601526	NOLC1_K562_rep02	0.786182	0
chr8	2601586	2601640	SAFB_K562_rep01	0.81519	0
chr8	2601617	2601646	CPSF6_K562_rep01	0.579257	0
chr8	2601734	2601768	HNRNPC_K562_rep01	0.557729	0
chr8	2601750	2601773	PPIL4_K562_rep01	-0.0281595	0
chr8	2602113	2602142	ZNF622_K562_rep01	0.37342	0
chr8	2602198	2602246	BUD13_K562_rep01	0.168508	0
chr8	2602199	2602231	METAP2_K562_rep01	-0.408391	0
chr8	2602201	2602242	DROSHA_K562_rep02	-0.201703	0
chr8	2602202	2602231	UCHL5_K562_rep02	-0.394438	0
chr8	2602204	2602240	HNRNPU_K562_rep02	-0.841451	0
chr8	2602341	2602366	HLTF_K562_rep02	0.162771	0
chr8	2602473	2602487	KHDRBS1_K562_rep01	-0.0983923	0
chr8	2602618	2602655	HNRNPC_K562_rep01	0.235801	0
chr8	2602637	2602656	HNRNPL_K562_rep02	0.492179	0
chr8	2602670	2602693	HNRNPL_K562_rep01	0.776661	0
chr8	2602798	2602813	FUS_K562_rep01	0.512207	0
chr8	2602802	2602816	HNRNPL_K562_rep02	0.492179	0
chr8	2603178	2603217	RBM15_K562_rep02	0.385174	0
chr8	2603185	2603210	NOLC1_K562_rep02	0.786182	0
chr8	2603197	2603208	PPIL4_K562_rep02	0.62519	0
chr8	2603348	2603355	HNRNPC_K562_rep01	0.235801	0
chr8	2603406	2603416	PPIL4_K562_rep01	0.234875	0
chr8	2603456	2603482	PPIL4_K562_rep01	0.649912	0
chr8	2603647	2603661	FUS_K562_rep01	0.190279	0
chr8	2603658	2603672	KHDRBS1_K562_rep02	0.727011	0
chr8	2603679	2603734	HLTF_K562_rep02	0.541283	0
chr8	2603683	2603717	HLTF_K562_rep01	0.493483	0
chr8	2603993	2604000	SAFB2_K562_rep01	0.383809	0
chr8	2604003	2604030	BUD13_K562_rep01	0.431543	0
chr8	2604205	2604231	FUS_K562_rep02	0.0504402	0
chr8	2604309	2604337	SLTM_K562_rep02	0.368149	0
chr8	2604401	2604449	HLTF_K562_rep02	0.840843	0
chr8	2604424	2604436	FUS_K562_rep01	0.775241	0
chr8	2604585	2604651	HLTF_K562_rep02	-0.159157	0
chr8	2604836	2604867	KHDRBS1_K562_rep01	0.48657	0
chr8	2605118	2605158	HNRNPC_K562_rep01	0.557729	0
chr8	2605129	2605152	NOLC1_K562_rep02	0.786182	0
chr8	2605156	2605188	HNRNPU_K562_rep01	-0.160574	0
chr8	2605287	2605326	HLTF_K562_rep01	0.230449	0
chr8	2605384	2605402	HLTF_K562_rep02	-0.574194	0
chr8	2605404	2605412	KHDRBS1_K562_rep01	0.223536	0
chr8	2605480	2605517	HLTF_K562_rep01	0.230449	0
chr8	2605691	2605734	SAFB_K562_rep02	0.409859	0
chr8	2605696	2605723	KHDRBS1_K562_rep01	0.223536	0
chr8	2605698	2605731	HNRNPU_K562_rep02	-0.841451	0
chr8	2605850	2605901	HLTF_K562_rep02	0.648198	0
chr8	2606040	2606072	HNRNPL_K562_rep02	0.492179	0
chr8	2606238	2606275	KHDRBS1_K562_rep01	-0.51343	0
chr8	2606248	2606320	HLTF_K562_rep01	0.493483	0
chr8	2606347	2606355	HNRNPU_K562_rep01	-0.160574	0
chr8	2606364	2606401	KHSRP_K562_rep02	0.583952	0
chr8	2606364	2606394	HNRNPU_K562_rep02	-0.841451	0
chr8	2606496	2606547	FUS_K562_rep01	0.997634	0
chr8	2606706	2606783	HLTF_K562_rep02	0.425806	0
chr8	2606710	2606754	HLTF_K562_rep01	0.493483	0
chr8	2606732	2606753	HNRNPA1_K562_rep01	0.32625	0
chr8	2606758	2606779	TAF15_K562_rep02	-0.0089915	0
chr8	2606759	2606786	KHDRBS1_K562_rep01	0.223536	0
chr8	2606818	2606844	KHDRBS1_K562_rep01	-0.683355	0
chr8	2606926	2606964	BUD13_K562_rep01	0.431543	0
chr8	2606931	2606978	HNRNPU_K562_rep02	-1.42641	0
chr8	2606932	2606960	KHDRBS1_K562_rep02	-0.857951	0
chr8	2606939	2606977	HNRNPC_K562_rep01	0.235801	0
chr8	2607000	2607034	HNRNPL_K562_rep02	-0.0927836	0
chr8	2607025	2607040	SAFB_K562_rep01	0.400152	0
chr8	2607087	2607106	SAFB_K562_rep02	0.824896	0
chr8	2607091	2607120	HNRNPUL1_K562_rep02	0.972429	0
chr8	2607377	2607393	BUD13_K562_rep02	-0.0090761	0
[truncated: 516 more rows]

## Sheet: ASAR9-23
Figure 1-table supplement 1
CHR	Start	Stop	RBP_Cell line_exp	Fold Enrichment	log10(pvalue)
chr9	22447635	22447645	SUPV3L1_HepG2_rep02	3.68864	1.63658
chr9	22447645	22447678	SUPV3L1_HepG2_rep02	3.68864	1.63658
chr9	22804639	22804682	HNRNPL_HepG2_rep01	2.69486	1.22456
chr9	22658437	22658463	PCBP2_HepG2_rep02	2.73565	1.15892
chr9	22792780	22792785	AGGF1_HepG2_rep02	2.04652	0.635552
chr9	22792785	22792801	AGGF1_HepG2_rep02	2.04652	0.635552
chr9	22674549	22674625	SRSF1_HepG2_rep02	1.81196	0.548822
chr9	22666419	22666457	QKI_HepG2_rep02	1.99133	0.493432
chr9	22723410	22723443	BCLAF1_HepG2_rep02	1.93222	0.485843
chr9	22683809	22683836	HLTF_HepG2_rep02	1.78031	0.462458
chr9	22732623	22732644	XRN2_HepG2_rep01	1.69731	0.447688
chr9	22447101	22447137	CSTF2T_HepG2_rep02	1.57928	0.396933
chr9	22447300	22447345	CSTF2T_HepG2_rep02	1.57928	0.396933
chr9	22762644	22762696	HNRNPC_HepG2_rep02	1.78916	0.362001
chr9	22674578	22674644	SRSF1_HepG2_rep01	1.57793	0.337495
chr9	22758145	22758167	MATR3_HepG2_rep01	1.48975	0.203554
chr9	22739337	22739372	HNRNPM_HepG2_rep01	1.32744	0.200026
chr9	22760304	22760328	HNRNPM_HepG2_rep01	1.32744	0.200026
chr9	22780270	22780294	HNRNPM_HepG2_rep01	1.32744	0.200026
chr9	22760018	22760028	HNRNPM_K562_rep01	1.26389	0.197805
chr9	22760028	22760062	HNRNPM_K562_rep01	1.26389	0.197805
chr9	22796764	22796796	PTBP1_HepG2_rep01	1.26054	0.197676
chr9	22447198	22447219	CSTF2T_HepG2_rep02	1.16424	0.193442
chr9	22792779	22792799	AGGF1_HepG2_rep01	1.43373	0.184134
chr9	22754152	22754191	HNRNPL_HepG2_rep01	1.37293	0.18404
chr9	22819786	22819826	HNRNPL_HepG2_rep01	1.37293	0.18404
chr9	22747839	22747884	IGF2BP1_K562_rep01	1.44394	0.172397
chr9	22447055	22447103	SRSF1_HepG2_rep01	0.577932	0
chr9	22447294	22447321	IGF2BP3_HepG2_rep01	-0.115088	0
chr9	22447504	22447531	U2AF1_HepG2_rep02	0.910358	0
chr9	22447546	22447581	GRWD1_HepG2_rep01	0.739185	0
chr9	22447591	22447625	SRSF1_HepG2_rep01	0.162895	0
chr9	22447759	22447781	TIA1_HepG2_rep02	-0.178955	0
chr9	22449246	22449269	HNRNPA1_HepG2_rep01	-1.23521	0
chr9	22451831	22451867	CSTF2_HepG2_rep01	0.362425	0
chr9	22451947	22451990	TIA1_HepG2_rep01	0.963472	0
chr9	22648690	22648723	HNRNPA1_HepG2_rep01	-1.23521	0
chr9	22682608	22682616	SRSF1_HepG2_rep01	0.162895	0
chr9	22689730	22689749	CSTF2_HepG2_rep01	-0.0526121	0
chr9	22739319	22739357	BCCIP_HepG2_rep01	0.925042	0
chr9	22740183	22740225	HNRNPA1_HepG2_rep01	-0.82017	0
chr9	22741669	22741700	HNRNPC_HepG2_rep02	0.789164	0
chr9	22765385	22765413	CSTF2_HepG2_rep01	-0.0526121	0
chr9	22804710	22804736	HNRNPL_HepG2_rep01	0.372929	0

## Sheet: XIST
Figure 1-table supplement 1
CHR	Start	Stop	RBP_Cell line_exp	Fold Enrichment	log10(pvalue)
chrX	73047088	73047143	PTBP1_K562_rep01	5.56932	400
chrX	73047143	73047160	PTBP1_K562_rep01	6.30628	400
chrX	73047160	73047221	PTBP1_K562_rep01	6.45983	400
chrX	73047167	73047229	PTBP1_K562_rep02	5.78731	400
chrX	73047221	73047243	PTBP1_K562_rep01	5.66516	400
chrX	73047229	73047275	PTBP1_K562_rep02	5.56735	400
chrX	73047243	73047265	PTBP1_K562_rep01	5.63235	400
chrX	73047294	73047353	PTBP1_K562_rep01	5.68367	400
chrX	73047296	73047428	MATR3_K562_rep01	4.23716	400
chrX	73047297	73047399	MATR3_K562_rep02	4.09929	400
chrX	73047298	73047352	PTBP1_K562_rep02	5.62729	400
chrX	73047352	73047385	PTBP1_K562_rep02	5.47786	400
chrX	73047353	73047392	PTBP1_K562_rep01	5.38584	400
chrX	73047385	73047395	PTBP1_K562_rep02	5.10771	400
chrX	73047392	73047420	PTBP1_K562_rep01	4.97396	400
chrX	73047395	73047431	PTBP1_K562_rep02	5.07272	400
chrX	73047445	73047478	PTBP1_K562_rep01	5.52867	400
chrX	73047477	73047552	PTBP1_K562_rep02	5.41937	400
chrX	73047478	73047545	PTBP1_K562_rep01	5.47841	400
chrX	73047576	73047630	PTBP1_K562_rep01	5.24171	400
chrX	73047577	73047629	PTBP1_K562_rep02	4.91778	400
chrX	73047652	73047695	PTBP1_K562_rep01	6.31355	400
chrX	73047655	73047695	PTBP1_K562_rep02	5.63605	400
chrX	73047695	73047727	PTBP1_K562_rep02	5.48439	400
chrX	73047695	73047738	PTBP1_K562_rep01	5.9013	400
chrX	73047730	73047792	PTBP1_K562_rep02	5.26125	400
chrX	73047738	73047793	PTBP1_K562_rep01	5.37736	400
chrX	73050939	73051043	ILF3_K562_rep01	4.76631	400
chrX	73065318	73065386	HNRNPK_K562_rep01	5.71969	400
chrX	73069614	73069697	HNRNPK_K562_rep01	6.62346	400
chrX	73070881	73070958	UCHL5_K562_rep01	3.49583	400
chrX	73071086	73071168	HNRNPM_K562_rep01	6.5772	400
chrX	73071095	73071152	HNRNPM_K562_rep02	6.25052	400
chrX	73071189	73071256	HNRNPM_K562_rep01	4.9966	400
chrX	73071194	73071256	HNRNPM_K562_rep02	4.86408	400
chrX	73071195	73071273	EXOSC5_K562_rep01	4.52944	400
chrX	73071197	73071265	UCHL5_K562_rep01	3.54187	400
chrX	73071215	73071259	UCHL5_K562_rep02	3.5219	400
chrX	73071256	73071287	HNRNPM_K562_rep01	6.18474	400
chrX	73071256	73071318	HNRNPM_K562_rep02	6.31534	400
chrX	73071287	73071321	HNRNPM_K562_rep01	6.32037	400
chrX	73071329	73071373	UCHL5_K562_rep02	4.53983	400
chrX	73071336	73071375	UCHL5_K562_rep01	4.46959	400
chrX	73071373	73071386	UCHL5_K562_rep02	4.51117	400
chrX	73071375	73071387	UCHL5_K562_rep01	4.42441	400
chrX	73071404	73071442	UCHL5_K562_rep01	3.7578	400
chrX	73071404	73071437	UCHL5_K562_rep02	3.74033	400
chrX	73071541	73071588	UCHL5_K562_rep01	3.65381	400
chrX	73071546	73071586	EXOSC5_K562_rep01	3.97142	400
chrX	73071547	73071567	UCHL5_K562_rep02	3.50299	400
chrX	73071548	73071606	RBM15_K562_rep01	3.99808	400
chrX	73071548	73071617	EXOSC5_K562_rep02	3.76458	400
chrX	73071567	73071588	UCHL5_K562_rep02	3.6011	400
chrX	73071588	73071597	UCHL5_K562_rep01	3.88523	400
chrX	73071588	73071599	UCHL5_K562_rep02	3.80545	400
chrX	73071597	73071606	UCHL5_K562_rep01	4.35679	400
chrX	73071599	73071606	UCHL5_K562_rep02	4.14654	400
chrX	73071606	73071618	UCHL5_K562_rep01	3.99217	400
chrX	73071606	73071618	UCHL5_K562_rep02	3.94614	400
chrX	73071618	73071632	UCHL5_K562_rep02	4.00009	400
chrX	73071629	73071655	UCHL5_K562_rep01	4.1622	400
chrX	73071632	73071656	UCHL5_K562_rep02	4.02325	400
chrX	73071655	73071701	UCHL5_K562_rep01	4.65416	400
chrX	73071691	73071773	NIPBL_K562_rep01	3.55699	400
chrX	73071693	73071750	RBM15_K562_rep01	5.00006	400
chrX	73071701	73071764	UCHL5_K562_rep01	3.82785	400
chrX	73071705	73071755	UCHL5_K562_rep02	3.67638	400
chrX	73071717	73071749	RBM15_K562_rep02	5.11309	400
chrX	73071749	73071757	RBM15_K562_rep02	5.43078	400
chrX	73071750	73071757	RBM15_K562_rep01	5.30742	400
chrX	73071757	73071766	RBM15_K562_rep02	5.22151	400
chrX	73071757	73071769	RBM15_K562_rep01	5.06885	400
chrX	73071766	73071807	RBM15_K562_rep02	5.86961	400
chrX	73071769	73071794	RBM15_K562_rep01	5.43285	400
chrX	73071806	73071848	RBM15_K562_rep01	5.29838	400
chrX	73071807	73071848	RBM15_K562_rep02	5.81144	400
chrX	73071895	73071938	RBM15_K562_rep01	4.34789	400
chrX	73071899	73071937	RBM15_K562_rep02	4.78605	400
chrX	73071996	73072028	RBM15_K562_rep02	5.07766	400
chrX	73071999	73072029	RBM15_K562_rep01	4.42762	400
chrX	73072028	73072044	RBM15_K562_rep02	4.18981	400
chrX	73072029	73072046	RBM15_K562_rep01	3.87369	400
chrX	73072044	73072056	RBM15_K562_rep02	3.8338	400
chrX	73072044	73072093	UCHL5_K562_rep01	4.04791	400
chrX	73072046	73072057	RBM15_K562_rep01	3.66285	400
chrX	73072056	73072063	RBM15_K562_rep02	3.90035	400
chrX	73072057	73072094	RBM15_K562_rep01	3.78072	400
chrX	73072063	73072080	RBM15_K562_rep02	4.05004	400
chrX	73072080	73072093	RBM15_K562_rep02	4.10835	400
chrX	73072099	73072138	RBM15_K562_rep02	4.21612	400
chrX	73072137	73072183	RBM15_K562_rep01	4.58434	400
chrX	73072138	73072167	RBM15_K562_rep02	4.93114	400
chrX	73072167	73072178	RBM15_K562_rep02	4.87574	400
chrX	73072178	73072183	RBM15_K562_rep02	4.934	400
chrX	73072186	73072223	RBM15_K562_rep02	5.0189	400
chrX	73072186	73072223	RBM15_K562_rep01	4.62016	400
chrX	73072223	73072246	RBM15_K562_rep02	4.56378	400
chrX	73072223	73072245	RBM15_K562_rep01	4.42622	400
chrX	73072245	73072267	RBM15_K562_rep01	4.7905	400
chrX	73072246	73072267	RBM15_K562_rep02	5.03557	400
chrX	73072267	73072284	RBM15_K562_rep02	4.81888	400
chrX	73072267	73072297	RBM15_K562_rep01	4.63108	400
chrX	73072352	73072377	UCHL5_K562_rep01	4.67914	400
chrX	73071028	73071086	HNRNPM_K562_rep01	6.72058	126.439
chrX	73065269	73065318	HNRNPK_K562_rep01	6.70842	117.155
chrX	73071047	73071083	HNRNPM_K562_rep02	6.46099	104.654
chrX	73065276	73065320	HNRNPK_K562_rep02	6.22135	90.5307
chrX	73071574	73071607	RBM15_K562_rep02	3.75441	87.3559
chrX	73070981	73071047	HNRNPM_K562_rep02	5.71201	87.3355
chrX	73047556	73047576	PTBP1_K562_rep01	5.31025	85.6434
chrX	73071096	73071153	EXOSC5_K562_rep01	5.04459	85.4898
chrX	73071203	73071255	RBM15_K562_rep01	4.60898	84.1756
chrX	73072357	73072379	UCHL5_K562_rep02	4.55803	81.9208
chrX	73065320	73065394	HNRNPK_K562_rep02	5.30516	81.1917
chrX	73072433	73072455	RBM15_K562_rep02	5.16176	80.3885
chrX	73047552	73047577	PTBP1_K562_rep02	5.19138	80.1084
chrX	73071195	73071215	UCHL5_K562_rep02	3.6804	79.9585
chrX	73071860	73071893	RBM15_K562_rep02	3.70922	79.5138
chrX	73071199	73071267	EXOSC5_K562_rep02	4.07228	79.3935
chrX	73072377	73072391	UCHL5_K562_rep01	4.22373	78.5729
chrX	73071386	73071404	UCHL5_K562_rep02	4.12912	77.6089
chrX	73071586	73071625	EXOSC5_K562_rep01	4.08904	77.4209
chrX	73070769	73070834	HNRNPM_K562_rep02	5.72682	77.3402
chrX	73065575	73065647	HNRNPK_K562_rep01	4.7103	76.8764
chrX	73072431	73072462	UCHL5_K562_rep01	3.66568	76.6084
chrX	73071387	73071404	UCHL5_K562_rep01	4.13816	76.426
chrX	73070923	73070953	UCHL5_K562_rep02	3.39406	76.0144
chrX	73047448	73047477	PTBP1_K562_rep02	5.00397	75.7639
chrX	73071618	73071629	UCHL5_K562_rep01	3.82157	75.5736
chrX	73070236	73070315	KHSRP_K562_rep01	3.65235	74.3978
chrX	73071794	73071806	RBM15_K562_rep01	5.20255	73.9601
chrX	73072379	73072391	UCHL5_K562_rep02	4.09323	72.28
chrX	73070875	73070923	UCHL5_K562_rep02	3.15305	72.0388
chrX	73072056	73072092	UCHL5_K562_rep02	3.62313	71.9488
chrX	73071627	73071652	RBM15_K562_rep01	4.40518	71.6971
chrX	73047175	73047284	MATR3_K562_rep01	4.70447	71.4865
chrX	73072431	73072473	RBM15_K562_rep01	5.02323	71.0237
chrX	73071101	73071147	UCHL5_K562_rep01	3.04042	70.2698
chrX	73071606	73071627	RBM15_K562_rep01	4.24819	70.1873
chrX	73071652	73071693	RBM15_K562_rep01	4.24819	70.1873
chrX	73070955	73071030	EXOSC5_K562_rep01	3.82455	69.5501
chrX	73047476	73047552	MATR3_K562_rep01	3.5812	69.3583
chrX	73070953	73070985	UCHL5_K562_rep02	3.76253	69.2061
chrX	73072017	73072097	NIPBL_K562_rep01	2.60273	68.3551
chrX	73047545	73047556	PTBP1_K562_rep01	5.01191	68.0403
chrX	73071227	73071256	RBM15_K562_rep02	4.29206	67.7456
chrX	73071755	73071765	UCHL5_K562_rep02	3.339	67.4832
chrX	73071708	73071717	RBM15_K562_rep02	4.80864	67.3678
chrX	73050986	73051048	ILF3_K562_rep02	4.36643	67.2996
chrX	73072100	73072137	RBM15_K562_rep01	3.97514	67.2316
chrX	73065876	73065957	HNRNPK_K562_rep01	5.06279	67.2001
chrX	73069612	73069691	HNRNPK_K562_rep02	5.3285	66.2317
chrX	73047420	73047432	PTBP1_K562_rep01	4.76112	65.9238
chrX	73071632	73071654	RBM15_K562_rep02	4.25417	65.7681
chrX	73072455	73072473	RBM15_K562_rep02	5.15483	65.5814
chrX	73071654	73071688	RBM15_K562_rep02	4.17891	65.3937
chrX	73071342	73071394	RBM15_K562_rep01	3.30666	65.3066
chrX	73040544	73040646	ZC3H11A_K562_rep02	6.10705	64.994
chrX	73070894	73070956	EXOSC5_K562_rep02	3.78685	64.9896
chrX	73071953	73071971	RBM15_K562_rep02	4.5436	64.1801
chrX	73070412	73070490	HNRNPM_K562_rep02	5.2878	64.1062
chrX	73071971	73071983	RBM15_K562_rep02	4.44118	63.5129
chrX	73070704	73070727	EXOSC5_K562_rep01	3.98666	62.7191
chrX	73072462	73072474	UCHL5_K562_rep01	3.90026	62.7065
chrX	73047069	73047149	TARDBP_K562_rep02	4.94784	62.5097
chrX	73071952	73071983	RBM15_K562_rep01	4.45985	62.5045
chrX	73071656	73071678	UCHL5_K562_rep02	4.20823	62.2128
chrX	73047066	73047148	TARDBP_K562_rep01	4.93313	61.349
chrX	73071459	73071510	UCHL5_K562_rep02	3.37031	61.0294
chrX	73071437	73071459	UCHL5_K562_rep02	3.29623	60.2374
chrX	73047265	73047278	PTBP1_K562_rep01	5.26189	60.149
chrX	73070366	73070412	HNRNPM_K562_rep02	5.71748	60.0589
chrX	73071259	73071266	UCHL5_K562_rep02	3.29231	60.0242
chrX	73062461	73062569	HNRNPK_K562_rep02	4.2094	59.8722
chrX	73071318	73071377	HNRNPM_K562_rep02	5.0228	59.2051
chrX	73071458	73071516	HNRNPM_K562_rep02	4.35866	59.1659
chrX	73065853	73065975	HNRNPK_K562_rep02	4.74837	58.9801
chrX	73070891	73070955	EXOSC5_K562_rep01	3.62379	58.5906
chrX	73047185	73047281	MATR3_K562_rep02	4.39087	56.735
chrX	73070958	73070986	UCHL5_K562_rep01	3.60114	56.4565
chrX	73072494	73072534	UCHL5_K562_rep01	3.98616	56.2693
chrX	73062505	73062545	HNRNPK_K562_rep01	4.29401	55.5959
chrX	73071569	73071574	RBM15_K562_rep02	3.42957	55.4595
chrX	73070985	73071008	UCHL5_K562_rep02	3.71176	54.9951
chrX	73071101	73071146	UCHL5_K562_rep02	2.74158	54.7894
chrX	73071884	73071895	RBM15_K562_rep01	3.28055	54.7464
chrX	73070692	73070727	UCHL5_K562_rep02	3.11013	54.732
chrX	73071850	73071895	SRSF1_K562_rep02	5.49444	54.5894
chrX	73070769	73070827	HNRNPM_K562_rep01	5.23351	53.9816
chrX	73071781	73071805	UCHL5_K562_rep01	4.05799	53.8168
chrX	73070689	73070704	EXOSC5_K562_rep01	4.03966	53.7263
chrX	73071607	73071621	RBM15_K562_rep02	3.85766	53.1921
chrX	73062595	73062671	HNRNPK_K562_rep01	4.3214	53.0707
chrX	73065573	73065624	HNRNPK_K562_rep02	4.20962	52.9249
chrX	73047480	73047555	MATR3_K562_rep02	3.24861	52.9206
chrX	73072435	73072463	UCHL5_K562_rep02	3.28909	52.0704
chrX	73072166	73072179	UCHL5_K562_rep01	3.82872	51.7211
chrX	73072463	73072473	UCHL5_K562_rep02	3.63531	51.535
chrX	73071753	73071770	SRSF1_K562_rep01	4.55791	50.4789
chrX	73071467	73071507	HNRNPM_K562_rep01	4.13836	49.7375
chrX	73070766	73070826	EXOSC5_K562_rep01	3.98754	48.6504
chrX	73070412	73070488	HNRNPM_K562_rep01	5.29853	48.6326
chrX	73069585	73069699	DROSHA_K562_rep01	2.68486	48.387
chrX	73064710	73064766	HNRNPK_K562_rep01	5.09283	48.3095
chrX	73071100	73071148	EXOSC5_K562_rep02	4.29524	47.891
chrX	73070956	73071013	EXOSC5_K562_rep02	3.47342	47.7448
chrX	73071895	73071899	RBM15_K562_rep02	3.50757	47.5871
chrX	73072147	73072179	UCHL5_K562_rep02	3.69437	47.5033
chrX	73072284	73072294	RBM15_K562_rep02	4.46102	47.4917
chrX	73072530	73072537	RBM15_K562_rep02	5.33937	47.464
chrX	73070983	73071028	HNRNPM_K562_rep01	5.04149	46.8436
chrX	73072147	73072166	UCHL5_K562_rep01	4.10663	46.7814
chrX	73070986	73071003	UCHL5_K562_rep01	3.60482	46.6382
chrX	73062396	73062450	HNRNPK_K562_rep01	3.72529	46.4365
chrX	73072507	73072530	RBM15_K562_rep02	5.46413	46.0274
chrX	73071863	73071884	RBM15_K562_rep01	3.6753	45.7125
chrX	73064993	73065060	HNRNPK_K562_rep01	4.84335	45.7034
chrX	73062545	73062595	HNRNPK_K562_rep01	4.55327	45.6326
chrX	73071854	73071897	SRSF1_K562_rep01	5.4084	45.4128
chrX	73071903	73071936	UCHL5_K562_rep02	3.53046	45.1552
chrX	73071778	73071804	UCHL5_K562_rep02	3.8815	45.1027
chrX	73070459	73070532	HNRNPK_K562_rep01	4.8239	45.0357
chrX	73071905	73071936	UCHL5_K562_rep01	3.55997	44.8331
chrX	73069566	73069701	DROSHA_K562_rep02	2.31473	44.7297
chrX	73068254	73068334	HNRNPK_K562_rep01	4.81078	44.5906
chrX	73072355	73072374	RBM15_K562_rep02	4.79032	44.5427
chrX	73071704	73071754	SRSF1_K562_rep02	4.36442	44.2406
chrX	73071356	73071436	EXOSC5_K562_rep02	3.01152	44.1724
chrX	73071734	73071753	SRSF1_K562_rep01	4.4914	43.6508
chrX	73071056	73071088	EXOSC5_K562_rep01	6.35925	43.4115
chrX	73071678	73071734	SRSF1_K562_rep01	3.90186	43.3937
chrX	73071558	73071569	RBM15_K562_rep02	3.26691	43.3852
chrX	73066443	73066512	HNRNPK_K562_rep01	4.06784	43.3444
chrX	73072358	73072383	RBM15_K562_rep01	4.78751	43.3231
chrX	73071711	73071762	EXOSC5_K562_rep01	3.45104	43.2561
chrX	73071459	73071511	EXOSC5_K562_rep01	3.77779	43.2146
chrX	73064949	73065032	HNRNPK_K562_rep02	4.9157	42.8184
chrX	73070639	73070677	EXOSC5_K562_rep01	4.76106	42.6475
chrX	73071813	73071829	UCHL5_K562_rep01	4.07264	42.4983
chrX	73071621	73071632	RBM15_K562_rep02	3.92537	42.3274
chrX	73071321	73071372	HNRNPM_K562_rep01	4.90499	42.3177
chrX	73072047	73072056	UCHL5_K562_rep02	3.23005	41.9806
chrX	73072058	73072095	SRSF1_K562_rep02	3.8982	41.6
chrX	73071442	73071456	UCHL5_K562_rep01	2.94523	41.4452
chrX	73070783	73070813	UCHL5_K562_rep02	3.17385	41.2776
chrX	73071390	73071437	EXOSC5_K562_rep01	3.01924	40.9464
chrX	73071754	73071768	SRSF1_K562_rep02	4.26408	40.9395
chrX	73046740	73046819	UCHL5_K562_rep01	3.49719	40.5863
chrX	73071344	73071390	EXOSC5_K562_rep01	3.99302	40.3551
chrX	73047474	73047541	TIA1_K562_rep02	3.95105	40.3465
chrX	73072183	73072186	RBM15_K562_rep02	4.65196	40.1424
chrX	73046819	73046917	UCHL5_K562_rep01	2.88648	40.099
chrX	73071770	73071807	SRSF1_K562_rep01	4.66605	40.0673
chrX	73071394	73071427	RBM15_K562_rep01	2.86468	39.7477
chrX	73072244	73072266	UCHL5_K562_rep02	2.34696	39.5798
chrX	73072249	73072286	UCHL5_K562_rep01	2.50118	39.4827
chrX	73072038	73072044	UCHL5_K562_rep01	4.16712	39.4366
chrX	73069589	73069614	HNRNPK_K562_rep01	4.64332	39.2515
chrX	73071539	73071547	UCHL5_K562_rep02	3.40666	38.7893
chrX	73072499	73072521	UCHL5_K562_rep02	3.50603	38.5264
chrX	73064697	73064771	HNRNPK_K562_rep02	4.59362	38.3355
chrX	73047577	73047631	MATR3_K562_rep02	5.1079	38.0785
chrX	73047578	73047628	MATR3_K562_rep01	5.21195	38.0174
chrX	73069468	73069563	HNRNPK_K562_rep01	3.99377	37.9451
chrX	73046917	73046983	UCHL5_K562_rep01	3.1233	37.7618
chrX	73072061	73072096	SRSF1_K562_rep01	3.87878	37.3359
chrX	73070426	73070467	DROSHA_K562_rep01	4.27629	37.2171
chrX	73070424	73070520	DROSHA_K562_rep02	3.44466	36.8168
chrX	73071507	73071516	HNRNPM_K562_rep01	4.71706	36.7487
chrX	73065624	73065646	HNRNPK_K562_rep02	4.38142	36.5919
chrX	73047664	73047694	MATR3_K562_rep01	5.16133	36.5601
chrX	73062599	73062699	HNRNPK_K562_rep02	3.66971	36.4758
chrX	73046491	73046575	UCHL5_K562_rep01	3.65503	36.1705
chrX	73070450	73070523	HNRNPK_K562_rep02	4.51331	36.0632
chrX	73071608	73071691	NIPBL_K562_rep01	3.08902	35.8859
chrX	73071702	73071768	NIPBL_K562_rep02	2.83865	35.8301
chrX	73070704	73070723	EXOSC5_K562_rep02	3.43888	35.763
chrX	73071211	73071221	RBM15_K562_rep02	3.88931	35.7226
chrX	73062469	73062505	HNRNPK_K562_rep01	4.68807	35.6144
chrX	73071625	73071674	EXOSC5_K562_rep01	3.6167	35.6043
chrX	73067680	73067684	LIN28B_K562_rep01	4.89495	35.425
chrX	73047120	73047125	PTBP1_K562_rep02	4.26125	35.3581
chrX	73046983	73047056	UCHL5_K562_rep01	3.33964	35.2087
chrX	73070467	73070512	DROSHA_K562_rep01	3.87719	35.0902
chrX	73072266	73072285	UCHL5_K562_rep02	2.52671	35.0495
chrX	73072132	73072184	NIPBL_K562_rep01	2.44808	34.065
chrX	73070186	73070236	KHSRP_K562_rep01	4.27597	34.0551
chrX	73065032	73065063	HNRNPK_K562_rep02	5.05277	34.0449
chrX	73070383	73070412	HNRNPM_K562_rep01	5.33237	33.7502
chrX	73071266	73071276	UCHL5_K562_rep02	3.19748	33.5886
chrX	73046912	73046994	ZNF622_K562_rep02	3.18721	33.5853
chrX	73072514	73072525	RBM15_K562_rep01	5.06195	33.5569
chrX	73070464	73070527	ILF3_K562_rep01	4.41765	33.5436
chrX	73047296	73047343	TIA1_K562_rep02	3.56449	33.4939
chrX	73046915	73046989	UCHL5_K562_rep02	2.88018	33.3855
chrX	73040803	73040936	LARP4_K562_rep02	3.96866	33.338
chrX	73071469	73071486	UCHL5_K562_rep01	2.95551	33.1824
chrX	73070690	73070704	EXOSC5_K562_rep02	3.46608	33.0292
chrX	73072199	73072286	NIPBL_K562_rep01	2.72992	33.0269
chrX	73047571	73047627	TIA1_K562_rep02	4.55651	32.7398
chrX	73071895	73071936	SRSF1_K562_rep02	5.20494	32.7216
chrX	73070794	73070807	UCHL5_K562_rep01	3.08002	32.5418
chrX	73071221	73071227	RBM15_K562_rep02	3.45253	32.362
chrX	73062429	73062461	HNRNPK_K562_rep02	3.52428	32.288
chrX	73072019	73072094	SDAD1_K562_rep02	3.49107	32.2744
chrX	73062693	73062766	HNRNPK_K562_rep01	3.79499	32.2214
chrX	73057280	73057351	U2AF2_K562_rep02	5.54303	32.1502
chrX	73071352	73071373	RBM15_K562_rep02	3.0576	32.0363
chrX	73070700	73070719	UCHL5_K562_rep01	2.7681	31.9646
chrX	73046680	73046740	UCHL5_K562_rep01	3.72869	31.8398
chrX	73071459	73071500	EXOSC5_K562_rep02	3.42196	31.765
chrX	73069563	73069589	HNRNPK_K562_rep01	4.2148	31.5683
chrX	73069505	73069567	HNRNPK_K562_rep02	4.05882	31.5363
chrX	73070255	73070309	TIA1_K562_rep01	4.32308	31.0477
chrX	73070332	73070471	SRSF1_K562_rep02	4.15576	30.9049
chrX	73071543	73071583	HNRNPM_K562_rep02	4.1685	30.8306
chrX	73071808	73071855	NIPBL_K562_rep02	3.11372	30.7575
chrX	73070262	73070315	KHSRP_K562_rep02	2.78847	30.5867
chrX	73071272	73071277	UCHL5_K562_rep01	3.22988	30.3968
chrX	73040532	73040617	ZC3H11A_K562_rep01	5.93844	30.3534
chrX	73066438	73066514	HNRNPK_K562_rep02	3.52136	30.2352
chrX	73071805	73071854	NIPBL_K562_rep01	2.74942	30.0613
chrX	73071716	73071761	EXOSC5_K562_rep02	3.04233	29.731
chrX	73071559	73071617	NIPBL_K562_rep02	3.54668	29.6944
chrX	73066174	73066235	HNRNPK_K562_rep01	3.88034	29.349
chrX	73046994	73047071	ZNF622_K562_rep02	2.99876	29.2196
chrX	73069314	73069370	HNRNPK_K562_rep01	3.08436	28.9392
chrX	73072138	73072190	SRSF1_K562_rep01	4.09451	28.8129
chrX	73062392	73062429	HNRNPK_K562_rep02	3.08756	28.747
chrX	73046989	73047057	UCHL5_K562_rep02	3.06101	28.3479
chrX	73072119	73072126	UCHL5_K562_rep01	3.67122	28.1744
chrX	73071807	73071854	SRSF1_K562_rep01	4.78256	27.5777
chrX	73050932	73050986	ILF3_K562_rep02	4.02763	27.5406
chrX	73066171	73066244	HNRNPK_K562_rep02	3.57386	27.4728
chrX	73072138	73072185	SRSF1_K562_rep02	4.15247	27.47
chrX	73070364	73070383	HNRNPM_K562_rep01	5.07124	27.4341
chrX	73071567	73071608	NIPBL_K562_rep01	3.36002	27.3416
chrX	73070236	73070262	KHSRP_K562_rep02	3.74413	27.275
chrX	73046482	73046572	UCHL5_K562_rep02	3.17355	27.2503
chrX	73046865	73046952	ZNF622_K562_rep01	2.99961	27.0838
chrX	73047694	73047729	MATR3_K562_rep01	3.78206	27.0644
chrX	73067608	73067680	LIN28B_K562_rep01	3.73006	26.9482
chrX	73072028	73072058	SRSF1_K562_rep02	3.63138	26.8974
chrX	73046818	73046915	UCHL5_K562_rep02	2.42659	26.87
chrX	73071897	73071936	SRSF1_K562_rep01	5.09451	26.832
chrX	73071280	73071307	EXOSC5_K562_rep01	3.89349	26.7061
chrX	73070727	73070737	UCHL5_K562_rep02	2.85248	26.3232
chrX	73067663	73067685	HNRNPK_K562_rep01	5.09489	26.1484
chrX	73071332	73071498	RBM22_K562_rep01	3.91154	26.0421
chrX	73072202	73072214	UCHL5_K562_rep01	2.92871	25.9626
chrX	73046875	73046992	LARP4_K562_rep02	3.29564	25.931
chrX	73071437	73071459	EXOSC5_K562_rep01	2.93733	25.7794
chrX	73071201	73071332	RBM22_K562_rep01	3.60093	25.7341
chrX	73053072	73053137	UCHL5_K562_rep01	2.79221	25.4056
chrX	73072041	73072070	NIPBL_K562_rep02	2.18411	25.2908
chrX	73072030	73072061	SRSF1_K562_rep01	3.58755	25.1702
chrX	73072096	73072138	SRSF1_K562_rep01	4.06413	25.0571
chrX	73070664	73070707	HNRNPM_K562_rep01	3.24117	25.0227
chrX	73071210	73071263	NIPBL_K562_rep01	3.26983	25.0084
chrX	73070466	73070524	ILF3_K562_rep02	4.04555	24.8961
chrX	73048915	73048986	ZNF622_K562_rep01	2.51092	24.7858
chrX	73068300	73068332	HNRNPK_K562_rep02	4.89492	24.711
chrX	73072286	73072292	UCHL5_K562_rep02	2.78613	24.6607
chrX	73040924	73041008	ZC3H11A_K562_rep01	3.76511	24.6316
chrX	73071773	73071805	NIPBL_K562_rep01	2.63951	24.5644
chrX	73072482	73072541	SRSF1_K562_rep02	4.17519	24.5405
chrX	73046695	73046834	ZNF622_K562_rep02	2.64584	24.4714
chrX	73071168	73071189	HNRNPM_K562_rep01	4.61438	24.4496
chrX	73071780	73071801	EXOSC5_K562_rep01	4.3905	24.1298
chrX	73070249	73070291	EXOSC5_K562_rep01	3.46767	24.0376
chrX	73070727	73070748	EXOSC5_K562_rep01	3.88571	23.9311
chrX	73047343	73047381	TIA1_K562_rep02	3.32342	23.9306
chrX	73067636	73067663	HNRNPK_K562_rep01	5.49543	23.8726
chrX	73072226	73072268	SRSF1_K562_rep01	3.84212	23.4914
chrX	73040810	73040925	NOLC1_K562_rep02	6.20122	23.3999
chrX	73071888	73071919	NIPBL_K562_rep01	2.50979	23.3319
chrX	73070361	73070409	UCHL5_K562_rep01	3.29328	23.1709
chrX	73069956	73070095	LSM11_K562_rep01	2.39759	23.1299
chrX	73072204	73072280	NIPBL_K562_rep02	2.61282	23.1218
chrX	73047069	73047153	SND1_K562_rep02	2.60734	23.0883
chrX	73048925	73048993	UCHL5_K562_rep01	2.48149	22.8907
chrX	73067663	73067685	HNRNPK_K562_rep02	4.78974	22.7476
chrX	73071196	73071247	AARS_K562_rep02	3.33669	22.6021
chrX	73072190	73072226	SRSF1_K562_rep01	4.09451	22.5286
chrX	73072488	73072540	SRSF1_K562_rep01	4.09451	22.5286
chrX	73071768	73071796	SRSF1_K562_rep02	4.48316	22.3732
chrX	73071436	73071459	EXOSC5_K562_rep02	2.79269	22.3545
chrX	73070677	73070689	EXOSC5_K562_rep01	4.29097	22.3131
chrX	73070794	73070822	EXOSC5_K562_rep02	3.38071	22.261
chrX	73071643	73071674	HNRNPM_K562_rep02	3.3302	22.1066
chrX	73067685	73067712	HNRNPK_K562_rep01	5.39355	22.0988
chrX	73068255	73068300	HNRNPK_K562_rep02	3.8722	21.8459
chrX	73070675	73070714	HNRNPM_K562_rep02	3.15852	21.8307
chrX	73066374	73066380	UTP3_K562_rep02	5.83774	21.8085
chrX	73069592	73069612	HNRNPK_K562_rep02	4.03008	21.7518
chrX	73070238	73070311	EXOSC5_K562_rep02	3.27379	21.7444
chrX	73047668	73047726	MATR3_K562_rep02	3.60486	21.6828
chrX	73064417	73064468	HNRNPK_K562_rep01	2.87394	21.5888
chrX	73046479	73046594	ZNF622_K562_rep02	2.62276	21.5486
chrX	73070189	73070236	KHSRP_K562_rep02	3.69325	21.5232
chrX	73057278	73057353	U2AF2_K562_rep01	4.56787	21.4254
chrX	73046745	73046799	UCHL5_K562_rep02	3.23561	21.3902
chrX	73045182	73045244	LIN28B_K562_rep01	6.04695	21.3818
chrX	73053070	73053151	ZNF622_K562_rep01	2.51092	21.3242
chrX	73047547	73047626	TIA1_K562_rep01	3.84454	21.2577
chrX	73053081	73053136	UCHL5_K562_rep02	2.63413	21.1587
chrX	73072095	73072138	SRSF1_K562_rep02	3.82011	21.1216
chrX	73051034	73051053	RBM15_K562_rep02	3.4493	21.0965
chrX	73070417	73070450	HNRNPK_K562_rep02	5.19413	21.079
chrX	73069462	73069505	HNRNPK_K562_rep02	4.18032	21.0578
chrX	73047552	73047578	MATR3_K562_rep01	3.85222	21.0021
chrX	73047002	73047047	RBM15_K562_rep02	4.67058	20.9932
chrX	73067685	73067713	HNRNPK_K562_rep02	5.18032	20.8438
chrX	73065546	73065575	HNRNPK_K562_rep01	3.99682	20.7316
chrX	73066380	73066403	UTP3_K562_rep02	5.51581	20.7233
chrX	73040873	73040983	NOLC1_K562_rep01	3.97244	20.4443
chrX	73046010	73046119	LARP4_K562_rep02	3.11061	20.4156
chrX	73072134	73072188	NIPBL_K562_rep02	2.2789	20.1363
chrX	73046692	73046745	UCHL5_K562_rep02	3.16744	20.11
chrX	73071532	73071588	HNRNPA1_K562_rep01	2.49404	20.0999
chrX	73064006	73064056	HNRNPK_K562_rep01	3.66049	20.0881
chrX	73048915	73049063	ZNF622_K562_rep02	1.91584	20.0664
chrX	73070771	73070794	EXOSC5_K562_rep02	3.34843	20.0031
chrX	73070353	73070388	UCHL5_K562_rep02	3.22705	19.7463
chrX	73070418	73070459	HNRNPK_K562_rep01	5.24545	19.7396
chrX	73046834	73046912	ZNF622_K562_rep02	2.92595	19.7383
chrX	73046462	73046582	LARP4_K562_rep02	2.91421	19.3523
chrX	73071956	73071984	SRSF1_K562_rep02	4.18185	19.3497
chrX	73047399	73047434	MATR3_K562_rep02	3.45999	19.1889
chrX	73040550	73040619	LARP4_K562_rep02	5.19961	19.0539
chrX	73070254	73070297	TIA1_K562_rep02	3.85971	19.0364
chrX	73047011	73047071	ZNF622_K562_rep01	2.77941	19.015
chrX	73065240	73065276	HNRNPK_K562_rep02	5.97174	19.0054
chrX	73072225	73072269	SRSF1_K562_rep02	3.54959	18.9939
chrX	73070647	73070669	EXOSC5_K562_rep02	4.08539	18.9407
chrX	73053070	73053151	ZNF622_K562_rep02	2.3992	18.7269
chrX	73046952	73047011	ZNF622_K562_rep01	2.51847	18.7025
chrX	73065060	73065101	HNRNPK_K562_rep01	3.45553	18.6898
chrX	73064417	73064468	HNRNPK_K562_rep02	2.68152	18.6852
chrX	73051053	73051066	RBM15_K562_rep02	3.41197	18.63
chrX	73048850	73048905	AQR_K562_rep02	6.55205	18.6236
chrX	73071321	73071463	RBFOX2_K562_rep02	2.07601	18.6229
chrX	73070334	73070457	ZNF622_K562_rep02	2.75973	18.5332
chrX	73047297	73047376	TIA1_K562_rep01	2.63279	18.4808
chrX	73071534	73071607	HNRNPA1_K562_rep02	2.33699	18.4705
chrX	73071552	73071579	HNRNPM_K562_rep01	3.53137	18.3581
chrX	73047182	73047262	TIA1_K562_rep02	3.10155	18.3135
chrX	73071854	73071888	NIPBL_K562_rep01	2.91406	18.2093
chrX	73069567	73069592	HNRNPK_K562_rep02	3.50963	18.1903
chrX	73047011	73047066	TARDBP_K562_rep01	4.21464	18.1015
chrX	73071805	73071835	SRSF1_K562_rep02	4.20035	18.0329
chrX	73071796	73071805	SRSF1_K562_rep02	3.61997	17.9547
chrX	73047089	73047121	UTP3_K562_rep02	3.79626	17.9159
chrX	73071835	73071850	SRSF1_K562_rep02	4.19113	17.9052
chrX	73065247	73065269	HNRNPK_K562_rep01	6.01327	17.7604
chrX	73070413	73070464	ILF3_K562_rep01	3.05855	17.5842
chrX	73062569	73062599	HNRNPK_K562_rep02	3.9502	17.5735
chrX	73072070	73072096	NIPBL_K562_rep02	1.95049	17.5434
chrX	73068617	73068679	HNRNPK_K562_rep01	2.88148	17.5016
chrX	73040922	73040985	ZC3H11A_K562_rep02	3.33396	17.5009
chrX	73047449	73047476	MATR3_K562_rep01	3.77928	17.3627
chrX	73046710	73046801	LARP4_K562_rep02	3.5348	17.3281
chrX	73046478	73046599	MTPAP_K562_rep02	3.28283	17.2954
chrX	73070338	73070449	SRSF1_K562_rep01	3.4689	17.1802
chrX	73071773	73071808	NIPBL_K562_rep02	2.44546	17.0266
chrX	73040781	73040834	UCHL5_K562_rep01	3.1955	17.0235
chrX	73070464	73070497	RBM15_K562_rep02	3.71737	16.9843
chrX	73070435	73070494	RBM15_K562_rep01	3.62401	16.9635
chrX	73072202	73072225	SRSF1_K562_rep02	3.7057	16.9163
chrX	73047084	73047089	UTP3_K562_rep02	4.51581	16.8851
chrX	73067641	73067663	HNRNPK_K562_rep02	4.92283	16.85
chrX	73064468	73064515	HNRNPK_K562_rep01	3.13753	16.8237
chrX	73071223	73071281	SDAD1_K562_rep02	3.48625	16.7826
chrX	73040695	73040768	NOLC1_K562_rep02	4.84508	16.7062
chrX	73071555	73071609	AARS_K562_rep02	2.58083	16.5675
chrX	73057274	73057342	ZNF622_K562_rep02	2.26367	16.5586
chrX	73065063	73065108	HNRNPK_K562_rep02	3.27689	16.5165
chrX	73066155	73066266	HNRNPL_K562_rep01	1.87396	16.4745
chrX	73065454	73065489	HNRNPK_K562_rep01	4.16528	16.4388
chrX	73070431	73070464	RBM15_K562_rep02	3.51446	16.3563
chrX	73071646	73071673	HNRNPM_K562_rep01	2.98971	16.2828
chrX	73063988	73064053	HNRNPK_K562_rep02	3.05479	16.1868
chrX	73072435	73072456	SRSF1_K562_rep02	3.96912	16.186
chrX	73065457	73065500	HNRNPK_K562_rep02	4.06484	16.1158
chrX	73046215	73046294	ZC3H11A_K562_rep02	2.70158	16.102
chrX	73070388	73070408	UCHL5_K562_rep02	3.28363	16.0911
chrX	73040834	73040885	UCHL5_K562_rep01	2.5461	16.076
chrX	73048986	73049010	ZNF622_K562_rep01	2.56607	15.9916
chrX	73070196	73070238	TIA1_K562_rep01	4.86365	15.9613
chrX	73062699	73062763	HNRNPK_K562_rep02	3.12897	15.9034
chrX	73072155	73072220	SDAD1_K562_rep02	3.05883	15.8652
chrX	73046675	73046808	XRCC6_K562_rep02	2.28067	15.8294
chrX	73071538	73071627	RBFOX2_K562_rep02	1.96139	15.7899
chrX	73070723	73070738	EXOSC5_K562_rep02	3.52775	15.7671
chrX	73069312	73069369	HNRNPK_K562_rep02	2.42133	15.7338
chrX	73072456	73072474	SRSF1_K562_rep02	3.9419	15.7185
chrX	73047743	73047779	MATR3_K562_rep01	3.06179	15.6968
chrX	73046478	73046603	GRWD1_K562_rep01	2.71158	15.6914
chrX	73040555	73040600	UCHL5_K562_rep01	3.30027	15.6911
chrX	73047474	73047547	TIA1_K562_rep01	2.79629	15.6583
chrX	73046741	73046803	GRWD1_K562_rep01	4.78558	15.6376
chrX	73071543	73071611	RBM22_K562_rep01	3.44339	15.5724
chrX	73064855	73064901	HNRNPK_K562_rep01	3.49543	15.568
chrX	73046808	73046922	XRCC6_K562_rep02	2.16819	15.4824
chrX	73070773	73070807	DROSHA_K562_rep01	3.27147	15.4666
chrX	73047381	73047429	TIA1_K562_rep02	3.4431	15.3898
chrX	73072268	73072292	SRSF1_K562_rep01	3.62502	15.3616
chrX	73047555	73047577	MATR3_K562_rep02	3.45235	15.351
chrX	73071784	73071798	EXOSC5_K562_rep02	3.82575	15.3246
chrX	73062816	73062850	HNRNPK_K562_rep01	4.01785	15.1886
chrX	73061082	73061164	EFTUD2_K562_rep02	3.14166	15.1381
chrX	73046702	73046803	ZNF622_K562_rep01	2.29096	15.0608
chrX	73071686	73071764	RBM22_K562_rep02	3.39472	15.0185
chrX	73072185	73072202	SRSF1_K562_rep02	3.96101	14.9705
chrX	73040511	73040544	ZC3H11A_K562_rep02	5.94951	14.6869
chrX	73071449	73071458	HNRNPM_K562_rep02	2.95849	14.6454
chrX	73068179	73068217	HNRNPU_K562_rep02	3.64505	14.5821
chrX	73041028	73041075	LARP4_K562_rep02	3.45853	14.5296
chrX	73067621	73067684	LIN28B_K562_rep02	3.01834	14.4613
chrX	73066845	73066881	HNRNPU_K562_rep02	4.45623	14.4487
chrX	73070268	73070292	HNRNPM_K562_rep01	3.92685	14.4262
chrX	73046743	73046870	TRA2A_K562_rep01	3.35422	14.336
chrX	73070297	73070306	TIA1_K562_rep02	3.8691	14.3191
chrX	73046668	73046865	GRWD1_K562_rep02	2.46716	14.3079
chrX	73070431	73070455	EXOSC5_K562_rep01	3.16811	14.2292
chrX	73047069	73047155	SND1_K562_rep01	2.12824	14.1748
chrX	73046677	73046743	TRA2A_K562_rep01	4.64967	14.0658
chrX	73065536	73065573	HNRNPK_K562_rep02	3.33786	14.0276
chrX	73071959	73071982	SRSF1_K562_rep01	3.94695	13.9281
chrX	73040915	73040979	WDR43_K562_rep02	3.01175	13.8001
chrX	73069751	73069777	HNRNPK_K562_rep01	4.28392	13.7207
chrX	73048842	73048903	AQR_K562_rep01	5.86513	13.6871
chrX	73070861	73070956	RBFOX2_K562_rep02	1.90614	13.6571
chrX	73070632	73070748	ILF3_K562_rep02	1.73741	13.5979
chrX	73046682	73046796	SRSF1_K562_rep02	3.61997	13.5916
chrX	73070687	73070717	TIA1_K562_rep02	1.34041	13.5739
chrX	73071438	73071524	TARDBP_K562_rep02	3.28704	13.5363
chrX	73053072	73053081	UCHL5_K562_rep02	3.09099	13.5245
chrX	73070670	73070739	PCBP1_K562_rep02	2.60938	13.5058
chrX	73047038	73047055	TARDBP_K562_rep02	4.09984	13.4183
chrX	73072435	73072473	SRSF1_K562_rep01	3.85058	13.3453
chrX	73051087	73051106	UCHL5_K562_rep02	2.49453	13.3094
chrX	73046595	73046616	UCHL5_K562_rep01	4.03724	13.2526
chrX	73062910	73062937	HNRNPK_K562_rep01	3.84335	13.191
chrX	73046480	73046576	TRA2A_K562_rep01	3.01026	13.1594
chrX	73047656	73047722	TIA1_K562_rep02	2.82471	13.1479
chrX	73040979	73041050	WDR43_K562_rep02	3.25276	13.1194
chrX	73070334	73070462	GRWD1_K562_rep01	3.24792	13.0974
chrX	73070670	73070741	HNRNPK_K562_rep01	1.99019	13.0048
chrX	73068301	73068338	HNRNPU_K562_rep02	3.52778	12.9881
chrX	73047682	73047819	TARDBP_K562_rep02	2.58278	12.9866
chrX	73048927	73048985	UCHL5_K562_rep02	2.08361	12.8469
chrX	73070667	73070753	ILF3_K562_rep01	1.69932	12.7707
chrX	73070333	73070422	ZNF622_K562_rep01	2.60224	12.765
chrX	73051066	73051079	RBM15_K562_rep02	2.87994	12.7502
chrX	73070418	73070466	ILF3_K562_rep02	2.73318	12.7451
chrX	73046956	73047053	DDX24_K562_rep02	2.3858	12.7194
chrX	73072097	73072132	NIPBL_K562_rep01	2.19159	12.6934
chrX	73046779	73046956	DDX24_K562_rep02	2.02009	12.6672
chrX	73053152	73053211	ZNF622_K562_rep02	2.54544	12.6663
chrX	73041935	73041997	ZC3H11A_K562_rep02	3.63373	12.6414
chrX	73046395	73046431	TIA1_K562_rep02	4.03416	12.5699
chrX	73040813	73040905	FASTKD2_K562_rep02	2.68402	12.5631
chrX	73045880	73046017	NOLC1_K562_rep01	2.48018	12.5524
chrX	73067191	73067214	HNRNPK_K562_rep01	3.78016	12.5261
chrX	73071711	73071765	XRCC6_K562_rep01	1.78675	12.437
chrX	73040702	73040766	NOLC1_K562_rep01	4.63735	12.4349
chrX	73070370	73070386	RBM15_K562_rep02	4.4937	12.3891
chrX	73072350	73072389	SRSF1_K562_rep01	3.09451	12.3438
chrX	73040834	73040896	ZC3H11A_K562_rep02	3.60271	12.3053
chrX	73057290	73057329	ZNF622_K562_rep01	2.03639	12.2948
chrX	73046294	73046391	ZC3H11A_K562_rep02	1.96109	12.2861
chrX	73051085	73051109	UCHL5_K562_rep01	2.47303	12.2263
chrX	73045184	73045249	LIN28B_K562_rep02	5.37823	12.2171
chrX	73047541	73047571	TIA1_K562_rep02	3.49713	12.1959
chrX	73070845	73070958	HNRNPU_K562_rep01	1.75946	12.1878
chrX	73070993	73071042	RBFOX2_K562_rep02	2.78375	12.1686
chrX	73040518	73040550	LARP4_K562_rep02	6.02274	12.1503
chrX	73070717	73070745	TIA1_K562_rep02	2.21703	12.1446
chrX	73071561	73071629	SDAD1_K562_rep02	2.41808	12.1064
chrX	73071203	73071256	AARS_K562_rep01	3.26531	12.0998
chrX	73047693	73047813	ZC3H11A_K562_rep01	2.38045	12.0079
chrX	73071692	73071771	DGCR8_K562_rep02	2.61909	12.002
chrX	73062802	73062843	HNRNPK_K562_rep02	3.47988	11.9843
chrX	73040533	73040596	FASTKD2_K562_rep02	3.31842	11.9127
chrX	73040810	73040873	NOLC1_K562_rep01	5.43299	11.8383
chrX	73046493	73046585	ZNF622_K562_rep01	2.11592	11.8138
chrX	73048899	73049056	GRWD1_K562_rep01	2.36613	11.7552
chrX	73072269	73072288	SRSF1_K562_rep02	3.26579	11.7302
chrX	73071197	73071279	RBFOX2_K562_rep01	1.70985	11.6906
chrX	73047072	73047135	UCHL5_K562_rep02	1.60556	11.6811
chrX	73046640	73046727	WDR43_K562_rep02	2.85975	11.6554
chrX	73071588	73071625	HNRNPA1_K562_rep01	2.22128	11.6273
chrX	73048993	73049037	UCHL5_K562_rep01	2.21893	11.6084
chrX	73046861	73047008	NOLC1_K562_rep01	2.35421	11.5934
chrX	73040814	73040896	NIPBL_K562_rep01	2.64602	11.5467
chrX	73046296	73046401	NOLC1_K562_rep01	1.79479	11.5305
chrX	73046037	73046041	UTP3_K562_rep02	4.75973	11.5271
chrX	73046688	73046818	XRCC6_K562_rep01	1.95016	11.4936
chrX	73071715	73071770	RBM22_K562_rep01	3.11476	11.4604
chrX	73071444	73071524	TARDBP_K562_rep01	3.26978	11.4522
chrX	73063840	73063859	HNRNPK_K562_rep01	3.73643	11.4247
chrX	73040559	73040612	NOLC1_K562_rep02	3.62076	11.42
chrX	73070461	73070519	PCBP1_K562_rep02	5.17572	11.4069
chrX	73069927	73069982	ILF3_K562_rep01	2.4003	11.3604
chrX	73046041	73046058	UTP3_K562_rep02	4.67227	11.3061
chrX	73041471	73041543	ILF3_K562_rep01	2.66849	11.2962
chrX	73064677	73064697	HNRNPK_K562_rep02	3.60917	11.2918
chrX	73047729	73047743	MATR3_K562_rep01	2.80143	11.2746
chrX	73047055	73047069	TARDBP_K562_rep02	4.37585	11.241
chrX	73046922	73047071	XRCC6_K562_rep02	1.64833	11.1334
chrX	73047009	73047038	TARDBP_K562_rep02	3.87455	11.125
chrX	73040799	73040920	RBFOX2_K562_rep01	2.47658	11.1105
chrX	73047075	73047144	NOLC1_K562_rep02	2.30358	11.0792
chrX	73046370	73046437	TIA1_K562_rep01	3.93765	11.027
chrX	73046218	73046305	NOLC1_K562_rep02	2.35097	10.9914
chrX	73057273	73057290	ZNF622_K562_rep01	3.01085	10.9797
chrX	73068611	73068666	HNRNPK_K562_rep02	2.31128	10.9257
chrX	73064769	73064791	HNRNPK_K562_rep01	3.40523	10.8997
chrX	73071112	73071152	XRCC6_K562_rep01	2.62267	10.8844
chrX	73043971	73043979	UTP3_K562_rep02	6.02277	10.8785
chrX	73071611	73071664	RBM22_K562_rep01	3.18035	10.8773
chrX	73040604	73040653	RBFOX2_K562_rep01	3.48138	10.862
chrX	73061217	73061316	SRSF1_K562_rep02	3.17519	10.849
chrX	73046083	73046158	ZC3H11A_K562_rep02	2.24907	10.7425
chrX	73046679	73046741	GRWD1_K562_rep01	3.33812	10.7266
chrX	73047075	73047146	NOLC1_K562_rep01	2.32976	10.686
chrX	73070956	73070993	RBFOX2_K562_rep02	2.1888	10.6478
chrX	73046218	73046296	NOLC1_K562_rep01	2.64639	10.6442
chrX	73046992	73047045	LARP4_K562_rep02	2.86841	10.6406
chrX	73064468	73064518	HNRNPK_K562_rep02	2.60917	10.6326
chrX	73041952	73042002	ZC3H11A_K562_rep01	3.79548	10.6095
chrX	73046594	73046673	ZNF622_K562_rep02	2.1287	10.5785
chrX	73071738	73071781	SDAD1_K562_rep02	3.76309	10.5495
chrX	73040612	73040674	NOLC1_K562_rep02	3.48662	10.5224
chrX	73071707	73071775	LSM11_K562_rep01	1.96105	10.5194
chrX	73067856	73067901	HNRNPK_K562_rep01	2.23101	10.4936
chrX	73040925	73041011	NOLC1_K562_rep02	3.13533	10.4921
chrX	73053158	73053210	SRSF1_K562_rep02	3.79244	10.4602
chrX	73053151	73053211	ZNF622_K562_rep01	2.31202	10.433
chrX	73040692	73040768	RBFOX2_K562_rep01	2.97398	10.4105
chrX	73047000	73047069	NOLC1_K562_rep02	2.48946	10.389
chrX	73046827	73046901	ZC3H11A_K562_rep01	2.35939	10.3758
chrX	73070969	73071018	RBM22_K562_rep01	3.85842	10.3373
chrX	73070291	73070306	EXOSC5_K562_rep01	2.65354	10.3342
chrX	73051051	73051084	ZNF622_K562_rep01	2.74688	10.3071
chrX	73046576	73046677	TRA2A_K562_rep01	3.11718	10.2725
chrX	73041259	73041321	ZC3H11A_K562_rep01	2.50175	10.2584
chrX	73053072	73053212	DDX24_K562_rep02	2.11916	10.217
chrX	73070876	73070994	ILF3_K562_rep02	1.52199	10.2162
chrX	73046985	73047082	GRWD1_K562_rep01	1.80207	10.2135
chrX	73062905	73062937	HNRNPK_K562_rep02	3.4978	10.2068
chrX	73066151	73066266	HNRNPL_K562_rep02	1.49776	10.1813
chrX	73041034	73041112	ZC3H11A_K562_rep02	2.48514	10.1561
chrX	73070238	73070255	TIA1_K562_rep01	4.31616	10.1329
chrX	73051106	73051109	UCHL5_K562_rep02	2.60556	10.1039
chrX	73047071	73047129	UCHL5_K562_rep01	1.57139	10.0899
chrX	73070371	73070388	RBM15_K562_rep01	4.48266	10.0686
chrX	73071919	73071935	NIPBL_K562_rep01	2.01102	9.96976
chrX	73050624	73050696	RBFOX2_K562_rep02	5.21117	9.9517
chrX	73057294	73057337	UCHL5_K562_rep02	1.75756	9.92559
chrX	73040891	73040924	ZC3H11A_K562_rep01	3.53245	9.92555
chrX	73072490	73072541	LSM11_K562_rep01	2.69046	9.91087
chrX	73061235	73061317	SRSF1_K562_rep01	3.11723	9.88847
chrX	73071208	73071276	RBM22_K562_rep02	3.06868	9.87196
chrX	73070435	73070520	GTF2F1_K562_rep01	3.29545	9.8386
chrX	73046803	73046865	ZNF622_K562_rep01	2.30833	9.83431
chrX	73043979	73044006	UTP3_K562_rep02	5.3447	9.82606
chrX	73071864	73071874	NIPBL_K562_rep02	2.92424	9.8253
chrX	73053070	73053150	GRWD1_K562_rep01	2.92308	9.82368
chrX	73070493	73070529	CSTF2T_K562_rep02	2.68696	9.8183
chrX	73072029	73072092	SDAD1_K562_rep01	3.05466	9.77636
chrX	73048937	73048978	RBM15_K562_rep01	2.69065	9.71249
chrX	73047049	73047136	NIPBL_K562_rep01	1.96795	9.66688
chrX	73041838	73041880	HNRNPL_K562_rep02	1.54193	9.65281
chrX	73050961	73051111	DDX24_K562_rep02	1.68567	9.58895
chrX	73053071	73053150	GRWD1_K562_rep02	2.86355	9.58855
chrX	73070667	73070726	PCBP1_K562_rep01	2.35769	9.58761
chrX	73047052	73047158	RBFOX2_K562_rep01	1.66244	9.55863
chrX	73069489	73069569	ILF3_K562_rep01	2.00798	9.5303
chrX	73070466	73070493	CSTF2T_K562_rep02	2.33555	9.52966
chrX	73072353	73072387	SRSF1_K562_rep02	3.02022	9.46829
chrX	73071902	73071936	SDAD1_K562_rep02	3.52277	9.46203
chrX	73065170	73065189	HNRNPK_K562_rep02	3.72781	9.46171
chrX	73072358	73072402	RBM22_K562_rep02	2.71617	9.45441
chrX	73070388	73070466	CSTF2T_K562_rep02	2.15653	9.45404
chrX	73047200	73047266	TIA1_K562_rep01	2.42308	9.40161
chrX	73041417	73041471	ILF3_K562_rep01	3.69403	9.37866
chrX	73047456	73047477	MATR3_K562_rep02	3.03427	9.36619
chrX	73046514	73046588	NOLC1_K562_rep02	2.85943	9.31612
chrX	73072499	73072546	NCBP2_K562_rep02	3.45022	9.30535
chrX	73047079	73047142	XRCC6_K562_rep01	2.32487	9.2371
chrX	73061262	73061306	UCHL5_K562_rep02	2.03767	9.22831
chrX	73040682	73040753	FUS_K562_rep02	3.20694	9.17582
chrX	73064863	73064897	HNRNPK_K562_rep02	2.85492	9.12407
chrX	73048932	73048979	PTBP1_K562_rep01	2.38388	9.12178
chrX	73071203	73071297	RBFOX2_K562_rep02	1.55804	9.12146
chrX	73051038	73051084	ZNF622_K562_rep02	2.34945	9.06643
chrX	73072243	73072283	SDAD1_K562_rep02	3.37077	9.05738
chrX	73057290	73057336	UCHL5_K562_rep01	1.75468	9.05124
chrX	73047869	73047948	AQR_K562_rep02	4.70405	9.04436
chrX	73067853	73067868	HNRNPK_K562_rep02	2.24542	9.02862
chrX	73071099	73071145	WRN_K562_rep01	3.49471	8.98723
chrX	73046585	73046665	ZNF622_K562_rep01	2.02251	8.97601
chrX	73046220	73046280	ZC3H11A_K562_rep01	2.43291	8.94842
chrX	73045920	73046014	NOLC1_K562_rep02	2.27651	8.94562
chrX	73071098	73071152	RBFOX2_K562_rep01	1.99701	8.85996
chrX	73060954	73061014	EFTUD2_K562_rep02	2.97174	8.84524
chrX	73064771	73064788	HNRNPK_K562_rep02	3.12374	8.83251
chrX	73070952	73071034	RBFOX2_K562_rep01	1.81	8.8187
chrX	73061014	73061082	EFTUD2_K562_rep02	2.46359	8.81702
chrX	73040985	73041021	ZC3H11A_K562_rep02	2.81611	8.77222
chrX	73067868	73067898	HNRNPK_K562_rep02	2.06484	8.7681
chrX	73040859	73040915	WDR43_K562_rep02	2.50925	8.72939
chrX	73046540	73046617	FASTKD2_K562_rep02	2.14405	8.71052
chrX	73046682	73046746	MTPAP_K562_rep02	2.86779	8.62841
chrX	73070466	73070524	CSTF2T_K562_rep01	2.18243	8.62565
chrX	73071335	73071409	RBFOX2_K562_rep01	1.75999	8.60239
chrX	73040549	73040682	FUS_K562_rep02	2.19728	8.60215
chrX	73053072	73053171	DDX24_K562_rep01	2.07477	8.60183
chrX	73046929	73046990	MTPAP_K562_rep02	2.28283	8.5859
chrX	73071549	73071669	XRCC6_K562_rep01	1.10072	8.56046
chrX	73062027	73062169	KHSRP_K562_rep01	1.36479	8.5583
chrX	73049010	73049061	ZNF622_K562_rep01	1.78223	8.54382
chrX	73057283	73057344	SRSF1_K562_rep02	3.06896	8.53182
chrX	73071900	73071934	SDAD1_K562_rep01	3.82333	8.52662
chrX	73048985	73049025	UCHL5_K562_rep02	1.93621	8.51527
chrX	73046688	73046748	TRA2A_K562_rep02	3.68795	8.51323
chrX	73040939	73040947	SF3B1_K562_rep02	3.89788	8.44681
chrX	73040981	73041020	LARP4_K562_rep02	2.36591	8.43767
chrX	73046698	73046792	DDX24_K562_rep01	2.0874	8.43632
chrX	73046709	73046787	NOLC1_K562_rep02	2.35772	8.41493
chrX	73041794	73041838	HNRNPL_K562_rep02	1.98522	8.39767
chrX	73046827	73046919	RBFOX2_K562_rep01	1.99371	8.38554
chrX	73071549	73071591	RBM22_K562_rep02	3.59064	8.37718
chrX	73070646	73070751	RBFOX2_K562_rep01	1.35116	8.37011
chrX	73046047	73046121	WDR43_K562_rep02	2.24308	8.36333
chrX	73047455	73047551	SND1_K562_rep02	1.11924	8.34987
chrX	73046853	73046916	NOLC1_K562_rep02	2.74038	8.34196
chrX	73046921	73047080	GRWD1_K562_rep02	1.49737	8.33764
chrX	73050058	73050143	QKI_K562_rep02	5.19525	8.33741
chrX	73070635	73070670	HNRNPK_K562_rep01	3.29903	8.33572
chrX	73057279	73057345	DDX24_K562_rep02	1.91187	8.32333
chrX	73048935	73049049	NOLC1_K562_rep01	2.21199	8.32114
chrX	73071565	73071611	AARS_K562_rep01	2.16098	8.31004
chrX	73047667	73047738	SND1_K562_rep02	1.57103	8.28784
chrX	73070894	73070948	DROSHA_K562_rep02	1.56882	8.28507
chrX	73067068	73067121	HNRNPU_K562_rep02	2.66634	8.2712
chrX	73043529	73043641	KHDRBS1_K562_rep01	1.84914	8.26448
chrX	73061020	73061149	EFTUD2_K562_rep01	2.27361	8.25943
chrX	73040753	73040815	FUS_K562_rep02	3.10933	8.22374
chrX	73065358	73065426	AKAP8L_K562_rep01	2.3042	8.20795
chrX	73070087	73070116	EXOSC5_K562_rep02	2.43089	8.18669
chrX	73071894	73071924	HNRNPC_K562_rep02	3.27535	8.18583
chrX	73046806	73046916	BUD13_K562_rep02	1.52436	8.17308
chrX	73071327	73071427	DDX51_K562_rep01	1.61628	8.1625
chrX	73071710	73071769	YWHAG_K562_rep01	2.89282	8.16246
chrX	73046108	73046185	NOLC1_K562_rep02	2.25567	8.15458
chrX	73070675	73070745	HNRNPK_K562_rep02	1.57791	8.11207
chrX	73040922	73041099	FUS_K562_rep02	1.5675	8.03722
chrX	73040935	73041030	LSM11_K562_rep01	2.36373	8.03518
chrX	73040546	73040637	ZNF622_K562_rep01	2.49895	7.98014
chrX	73046801	73046862	LARP4_K562_rep02	2.76221	7.93435
chrX	73040920	73040982	RBFOX2_K562_rep01	2.15465	7.92782
chrX	73065530	73065575	HNRNPU_K562_rep01	2.32641	7.90278
chrX	73061215	73061252	ZNF622_K562_rep01	2.11885	7.89123
chrX	73051084	73051110	ZNF622_K562_rep02	1.96187	7.88847
chrX	73072157	73072184	HNRNPC_K562_rep02	3.22836	7.87267
chrX	73046971	73047052	RBFOX2_K562_rep01	2.21265	7.87131
chrX	73071822	73071845	SDAD1_K562_rep02	4.17813	7.86489
chrX	73070413	73070466	CSTF2T_K562_rep01	2.34508	7.84567
chrX	73047008	73047075	NOLC1_K562_rep01	2.27508	7.78893
chrX	73066651	73066703	HNRNPL_K562_rep02	2.64868	7.77604
chrX	73046919	73046985	GRWD1_K562_rep01	1.94398	7.74545
chrX	73040551	73040604	RBFOX2_K562_rep01	2.78692	7.7349
chrX	73046214	73046294	RBFOX2_K562_rep01	1.64929	7.71965
chrX	73051084	73051110	ZNF622_K562_rep01	1.9353	7.69332
chrX	73040815	73040922	FUS_K562_rep02	2.09275	7.68561
chrX	73053150	73053210	GRWD1_K562_rep01	3.46365	7.68059
chrX	73046692	73046748	FASTKD2_K562_rep02	2.31842	7.64795
chrX	73065500	73065518	HNRNPK_K562_rep02	2.96101	7.6399
chrX	73070386	73070402	RBM15_K562_rep02	3.47264	7.62293
chrX	73064410	73064460	TIA1_K562_rep02	2.54353	7.61201
chrX	73057290	73057384	SF3B4_K562_rep02	1.70596	7.60878
chrX	73070634	73070687	TIA1_K562_rep02	1.00618	7.58047
chrX	73071347	73071405	AARS_K562_rep02	1.98877	7.55269
chrX	73071105	73071150	DDX51_K562_rep01	2.29435	7.55207
chrX	73046839	73046965	SRSF1_K562_rep01	2.3169	7.54195
chrX	73070454	73070522	PCBP1_K562_rep01	4.23216	7.53622
chrX	73070686	73070717	TIA1_K562_rep01	1.03526	7.50774
chrX	73070783	73070852	ILF3_K562_rep01	1.88468	7.46977
chrX	73071854	73071940	HNRNPC_K562_rep01	2.96372	7.42896
chrX	73045950	73045989	ZC3H11A_K562_rep01	2.96541	7.41966
chrX	73067783	73067839	HNRNPU_K562_rep02	2.43157	7.41389
chrX	73057278	73057351	BUD13_K562_rep01	1.44414	7.40801
chrX	73046698	73046793	RBFOX2_K562_rep01	2.09325	7.40727
chrX	73071217	73071255	SRSF1_K562_rep01	1.92458	7.40246
chrX	73040982	73041054	RBFOX2_K562_rep01	1.93343	7.40232
chrX	73046746	73046800	MTPAP_K562_rep02	2.70909	7.38351
chrX	73072250	73072307	HNRNPC_K562_rep02	2.86032	7.3361
chrX	73044747	73044806	DROSHA_K562_rep01	2.42034	7.33272
chrX	73046496	73046591	GRWD1_K562_rep02	1.94871	7.32958
chrX	73070654	73070729	GTF2F1_K562_rep01	1.97797	7.29888
chrX	73072026	73072041	NIPBL_K562_rep02	1.94791	7.28859
chrX	73046688	73046849	ZNF800_K562_rep02	2.0802	7.26956
chrX	73040505	73040545	WDR43_K562_rep02	4.23415	7.2597
chrX	73064392	73064468	HNRNPL_K562_rep02	1.67828	7.24718
chrX	73070324	73070437	GRWD1_K562_rep02	2.56098	7.24222
chrX	73071380	73071441	SDAD1_K562_rep02	1.94193	7.24104
chrX	73071463	73071519	RBFOX2_K562_rep02	1.94567	7.21792
chrX	73048939	73048973	RBM15_K562_rep02	2.30078	7.19664
chrX	73046606	73046682	SRSF1_K562_rep02	2.58521	7.1821
chrX	73041487	73041544	ILF3_K562_rep02	2.25002	7.18148
chrX	73041666	73041727	ZC3H11A_K562_rep02	2.36455	7.16618
chrX	73061236	73061357	ZNF622_K562_rep02	1.40696	7.16392
chrX	73046998	73047050	FASTKD2_K562_rep02	2.15261	7.16155
chrX	73071539	73071648	FTO_K562_rep01	1.46634	7.14492
chrX	73040768	73040810	NOLC1_K562_rep02	3.78618	7.12816
chrX	73040573	73040641	NOLC1_K562_rep01	3.11106	7.12719
chrX	73072431	73072471	RBM22_K562_rep01	2.6427	7.12295
chrX	73046305	73046393	NOLC1_K562_rep02	1.42664	7.11525
chrX	73050982	73051051	ZNF622_K562_rep01	1.90947	7.10563
chrX	73047025	73047038	RBM15_K562_rep01	3.61759	7.09919
chrX	73071218	73071257	SRSF1_K562_rep02	1.82522	7.0963
chrX	73071191	73071268	HNRNPU_K562_rep01	1.2171	7.09307
chrX	73061252	73061345	ZNF622_K562_rep01	1.52954	7.08879
chrX	73065293	73065348	AKAP8L_K562_rep01	2.3042	7.08401
chrX	73046149	73046194	ZC3H11A_K562_rep01	2.72148	7.06557
chrX	73048904	73048984	TRA2A_K562_rep01	2.27666	7.05871
chrX	73055598	73055603	SF3B1_K562_rep01	6.2136	7.04568
chrX	73040934	73041024	FASTKD2_K562_rep02	1.89179	7.03123
chrX	73066636	73066697	HNRNPL_K562_rep01	2.44804	7.0297
chrX	73062891	73062949	DDX42_K562_rep01	2.63928	7.02169
chrX	73051060	73051085	UCHL5_K562_rep01	1.91967	7.01725
chrX	73040713	73040730	UCHL5_K562_rep01	2.32103	6.99409
chrX	73047758	73047770	MATR3_K562_rep02	2.58636	6.97634
chrX	73046482	73046551	SRSF1_K562_rep02	2.54959	6.93704
chrX	73065543	73065639	DROSHA_K562_rep01	1.45979	6.93271
chrX	73047071	73047141	ZNF622_K562_rep01	1.28769	6.92329
chrX	73053096	73053118	RBM15_K562_rep02	2.68634	6.90053
chrX	73046864	73046928	UTP3_K562_rep01	3.2091	6.8855
chrX	73071102	73071147	RBM22_K562_rep01	2.7164	6.86764
chrX	73071708	73071762	YWHAG_K562_rep02	2.88464	6.85605
chrX	73072056	73072102	DDX51_K562_rep02	2.10883	6.84891
chrX	73046712	73046777	SRSF1_K562_rep01	3.13403	6.84845
chrX	73044751	73044823	TARDBP_K562_rep02	3.30976	6.83632
chrX	73072497	73072542	SLTM_K562_rep02	2.77025	6.83251
chrX	73070907	73070950	RBM22_K562_rep02	3.16179	6.83056
chrX	73068597	73068672	HNRNPU_K562_rep02	1.70936	6.81693
chrX	73050642	73050691	RBFOX2_K562_rep01	4.54697	6.81444
chrX	73072226	73072256	RBM22_K562_rep01	3.38199	6.80923
chrX	73063536	73063587	HNRNPU_K562_rep02	2.00757	6.77173
chrX	73065084	73065104	HNRNPU_K562_rep02	4.38094	6.77133
chrX	73051056	73051087	UCHL5_K562_rep02	1.72586	6.75343
chrX	73067183	73067201	HNRNPK_K562_rep02	3.01593	6.74644
chrX	73044860	73044869	SF3B1_K562_rep01	4.85103	6.72949
chrX	73046844	73046980	XRCC6_K562_rep01	1.35588	6.7071
chrX	73061018	73061100	PRPF8_K562_rep01	3.58151	6.70109
chrX	73053073	73053137	SRSF1_K562_rep02	2.51306	6.69255
chrX	73040566	73040616	XRCC6_K562_rep02	2.9458	6.68185
chrX	73046583	73046670	SRSF1_K562_rep01	2.56844	6.66865
chrX	73046658	73046792	SAFB_K562_rep01	2.04549	6.6624
chrX	73041033	73041076	NOLC1_K562_rep02	3.26011	6.66177
chrX	73070781	73070845	ILF3_K562_rep02	1.8577	6.65981
chrX	73061212	73061244	DDX24_K562_rep02	2.53419	6.65756
chrX	73040947	73040979	SF3B1_K562_rep02	2.99366	6.65477
chrX	73064391	73064464	HNRNPL_K562_rep01	1.63392	6.64764
chrX	73068182	73068205	HNRNPK_K562_rep02	2.64981	6.61795
chrX	73046720	73046783	CPEB4_K562_rep02	3.42081	6.61744
chrX	73072428	73072473	LSM11_K562_rep01	2.00116	6.58771
chrX	73071924	73071940	HNRNPC_K562_rep02	2.74484	6.56505
chrX	73040849	73040852	RBM15_K562_rep02	2.99988	6.55976
chrX	73047067	73047139	BUD13_K562_rep02	1.79828	6.55011
chrX	73040983	73041018	NOLC1_K562_rep01	3.07935	6.54743
chrX	73047309	73047375	SMNDC1_HepG2_rep01	5.05014	6.54106
chrX	73057282	73057294	UCHL5_K562_rep02	2.12751	6.50491
chrX	73046687	73046823	SAFB2_K562_rep01	1.85413	6.48966
chrX	73071659	73071752	SLTM_K562_rep01	2.16038	6.48492
chrX	73045070	73045111	HNRNPU_K562_rep02	3.49245	6.46241
chrX	73065529	73065572	HNRNPU_K562_rep02	2.10851	6.4587
chrX	73070717	73070746	TIA1_K562_rep01	1.67985	6.45445
chrX	73044869	73044900	SF3B1_K562_rep01	4.62864	6.44343
chrX	73071110	73071148	XRCC6_K562_rep02	2.2613	6.42314
chrX	73066399	73066431	HNRNPU_K562_rep02	2.02754	6.4225
chrX	73071909	73071934	AARS_K562_rep02	3.16837	6.41991
chrX	73046878	73046958	FASTKD2_K562_rep02	1.59451	6.41498
chrX	73071771	73071804	DGCR8_K562_rep02	2.87285	6.407
chrX	73061215	73061236	ZNF622_K562_rep02	2.2308	6.40326
chrX	73042065	73042118	ILF3_K562_rep01	1.72409	6.39319
chrX	73046825	73047044	RBFOX2_K562_rep02	1.47937	6.37572
chrX	73048787	73048883	PRPF8_K562_rep01	3.97383	6.35873
chrX	73040690	73040817	FUS_K562_rep01	2.69278	6.35869
chrX	73071822	73071841	SDAD1_K562_rep01	4.35583	6.34658
chrX	73072095	73072138	HNRNPC_K562_rep02	3.44528	6.32379
chrX	73048939	73049048	NOLC1_K562_rep02	1.96372	6.31126
chrX	73046709	73046809	FUS_K562_rep02	1.86237	6.30864
chrX	73046916	73046987	TRA2A_K562_rep01	2.25468	6.30249
chrX	73072234	73072279	DGCR8_K562_rep02	3.20405	6.3023
chrX	73040871	73040983	XRCC6_K562_rep01	1.34006	6.29867
chrX	73046870	73046929	MTPAP_K562_rep02	1.92329	6.29771
chrX	73068587	73068678	HNRNPU_K562_rep01	1.63298	6.28322
chrX	73040541	73040633	ZNF622_K562_rep02	2.28594	6.27523
chrX	73046997	73047063	SRSF1_K562_rep02	2.16054	6.27109
chrX	73041282	73041324	NOLC1_K562_rep02	2.72478	6.25749
chrX	73070353	73070417	MTPAP_K562_rep02	3.00529	6.25571
chrX	73071711	73071769	RBFOX2_K562_rep01	1.51978	6.22162
chrX	73061213	73061331	GRWD1_K562_rep01	1.80618	6.20152
chrX	73068300	73068327	HNRNPU_K562_rep01	2.77803	6.19679
chrX	73041952	73042035	ILF3_K562_rep01	1.81807	6.19307
chrX	73072493	73072543	YWHAG_K562_rep01	2.19344	6.18745
chrX	73051043	73051068	ILF3_K562_rep01	2.34227	6.1863
chrX	73041029	73041078	XRCC6_K562_rep01	2.09144	6.18629
chrX	73072251	73072306	HNRNPC_K562_rep01	2.77496	6.18086
chrX	73072359	73072393	RBFOX2_K562_rep01	2.69897	6.16104
chrX	73040560	73040624	AARS_K562_rep01	3.40282	6.12875
chrX	73057329	73057341	ZNF622_K562_rep01	1.6711	6.11979
chrX	73072188	73072226	DDX51_K562_rep01	2.63539	6.11923
chrX	73046400	73046435	ZC3H11A_K562_rep02	2.571	6.082
chrX	73047444	73047474	TIA1_K562_rep02	2.07264	6.07213
chrX	73070092	73070153	U2AF2_K562_rep02	2.82984	6.06993
chrX	73046753	73046826	TRA2A_K562_rep02	2.5968	6.0691
chrX	73070871	73070946	ILF3_K562_rep01	1.32805	6.06905
chrX	73070808	73070853	DDX51_K562_rep02	2.21525	6.06616
chrX	73043796	73043853	HNRNPU_K562_rep02	2.61798	6.03819
chrX	73046842	73046911	DDX24_K562_rep01	1.79991	6.03421
chrX	73047656	73047701	TIA1_K562_rep01	2.15629	6.02066
chrX	73071855	73071895	U2AF1_K562_rep01	2.72387	6.01994
chrX	73070882	73070957	GTF2F1_K562_rep02	1.86571	6.0138
chrX	73072486	73072537	DGCR8_K562_rep02	2.98904	6.00954
chrX	73064997	73065051	DDX42_K562_rep02	2.29863	5.99161
chrX	73040727	73040763	XRCC6_K562_rep01	3.63974	5.98478
chrX	73071212	73071271	DDX51_K562_rep01	1.49435	5.97815
chrX	73046707	73046783	LARP4_K562_rep01	2.59025	5.91851
chrX	73042795	73042860	KHDRBS1_K562_rep02	2.6339	5.89698
chrX	73071606	73071628	RBFOX2_K562_rep01	1.70537	5.89032
chrX	73051004	73051034	RBM15_K562_rep02	1.69184	5.8816
chrX	73047071	73047133	ZNF622_K562_rep02	1.21045	5.84927
chrX	73062394	73062447	DROSHA_K562_rep02	1.7838	5.84143
chrX	73046831	73046878	FASTKD2_K562_rep02	1.97002	5.83342
chrX	73046205	73046299	SAFB_K562_rep02	1.45716	5.81539
chrX	73070644	73070728	RBM22_K562_rep01	1.54808	5.81352
chrX	73067787	73067847	HNRNPU_K562_rep01	2.03344	5.80557
chrX	73047078	73047127	DDX24_K562_rep01	2.15981	5.80546
chrX	73046987	73047066	TRA2A_K562_rep01	2.50247	5.8044
chrX	73040978	73041050	SAFB_K562_rep01	2.79247	5.80018
chrX	73063665	73063714	HNRNPU_K562_rep02	1.35008	5.79631
chrX	73062281	73062311	ILF3_K562_rep01	1.5519	5.76123
chrX	73071101	73071143	RBM22_K562_rep02	2.53817	5.75878
chrX	73070869	73070952	RBFOX2_K562_rep01	1.28053	5.75078
chrX	73046503	73046572	MTPAP_K562_rep01	2.31955	5.74912
chrX	73070952	73070985	AARS_K562_rep02	2.56747	5.74509
chrX	73047084	73047126	WDR43_K562_rep02	2.27479	5.74323
chrX	73069112	73069142	HNRNPU_K562_rep02	2.7515	5.74184
chrX	73071736	73071763	SDAD1_K562_rep01	3.50783	5.72897
chrX	73040571	73040617	DROSHA_K562_rep01	3.23976	5.72619
chrX	73065965	73066017	AKAP8L_K562_rep01	2.26767	5.71656
chrX	73072138	73072157	HNRNPC_K562_rep02	3.31638	5.69546
chrX	73071546	73071639	FTO_K562_rep02	1.38912	5.69452
chrX	73053147	73053209	MTPAP_K562_rep02	2.45275	5.67278
chrX	73071107	73071154	RBFOX2_K562_rep02	1.75584	5.66605
chrX	73041793	73041884	HNRNPL_K562_rep01	1.14166	5.64981
chrX	73053072	73053151	NOLC1_K562_rep01	2.52834	5.64919
chrX	73051040	73051067	RBM15_K562_rep01	2.05231	5.62395
chrX	73047094	73047141	ZC3H11A_K562_rep01	1.99712	5.61662
chrX	73050067	73050167	QKI_K562_rep01	5.14007	5.61339
chrX	73046911	73046975	DDX24_K562_rep01	1.751	5.60859
chrX	73053150	73053210	GRWD1_K562_rep02	3.02333	5.60102
chrX	73069041	73069076	HNRNPU_K562_rep02	2.53552	5.59616
chrX	73053184	73053207	UCHL5_K562_rep02	1.65065	5.59144
chrX	73055603	73055621	SF3B1_K562_rep01	4.62864	5.58586
chrX	73065238	73065275	HNRNPU_K562_rep02	2.38094	5.57991
chrX	73047067	73047143	BUD13_K562_rep01	1.5966	5.56633
chrX	73061095	73061167	U2AF2_K562_rep02	2.54444	5.55505
chrX	73071097	73071147	HNRNPU_K562_rep01	1.69741	5.54609
chrX	73047747	73047800	TARDBP_K562_rep01	1.96166	5.53721
chrX	73066431	73066469	HNRNPU_K562_rep02	1.15521	5.53423
chrX	73070946	73071004	ILF3_K562_rep01	1.4461	5.53377
chrX	73057274	73057344	PUM1_K562_rep01	3.38168	5.53232
chrX	73040604	73040690	FUS_K562_rep01	2.15991	5.53083
chrX	73071560	73071594	SRSF1_K562_rep01	1.69902	5.52542
chrX	73046823	73046915	SAFB2_K562_rep01	1.87977	5.51184
chrX	73070708	73070747	SDAD1_K562_rep01	4.1859	5.49979
chrX	73046757	73046796	FASTKD2_K562_rep02	2.06688	5.49492
chrX	73070901	73070936	DROSHA_K562_rep01	1.68651	5.47585
chrX	73071855	73071892	U2AF1_K562_rep02	2.97826	5.46818
chrX	73041037	73041077	NOLC1_K562_rep01	3.18245	5.46637
chrX	73046719	73046751	ZC3H11A_K562_rep01	2.42352	5.46469
[truncated: 7,497 more rows]
